# Supplementary material for: Comparison of Proangiogenic Effects of Adipose-Derived Stem Cells and Foreskin Fibroblast Exosomes on Artificial Dermis Prefabricated Flaps
Source: Stem Cells Int. 2020 Jan 31;2020:5293850. doi: 10.1155/2020/5293850 (PMC7013349; doi:10.1155/2020/5293850)
Supplement: Supplementary Materials — The supplementary material is the raw data of the target gene prediction result. [file 5293850.f1.xlsx]

## Sheet: appendix1
miRNA_id	Transcript	Total score	Total energy	Max score	Max energy	Strand	miRNAlength	Transcript length	Position	gene	Dbxref	product	GO_id	GO_term	pathway	pathway_description
hsa-miR-1180-3p	NM_000037.3	161	-34.22	161	-34.22	24	22	8300	1762	ANK1	GeneID:286,Genbank:NM_001142446.1,HGNC:HGNC:492,MIM:612641	ankyrin 1			path:hsa05205	Proteoglycans in cancer
hsa-miR-1180-3p	NM_000048.3	161	-30.37	161	-30.37	35	22	1937	432	ASL	GeneID:435,Genbank:NM_000048.3,HGNC:HGNC:746,MIM:608310	argininosuccinate lyase	GO:0000050,GO:0004056,GO:0005737,GO:0005829,GO:0042450,GO:0042802,GO:0070062	urea cycle|argininosuccinate lyase activity|cytoplasm|cytosol|arginine biosynthetic process via ornithine|identical protein binding|extracellular exosome	path:hsa00220,path:hsa00250	Arginine biosynthesis|Alanine, aspartate and glutamate metabolism
hsa-miR-1180-3p	NM_000094.3	162	-32.89	162	-32.89	80	22	9169	1768	COL7A1	GeneID:1294,Genbank:XM_017005688.1,HGNC:HGNC:2214,MIM:120120	collagen type VII alpha 1 chain	GO:0000139,GO:0004867,GO:0005576,GO:0005590,GO:0005604,GO:0005615,GO:0005788,GO:0006888,GO:0007155,GO:0008544,GO:0030134,GO:0030198,GO:0030574,GO:0033116,GO:0035987,GO:0042802,GO:0048208	Golgi membrane|serine-type endopeptidase inhibitor activity|extracellular region|collagen type VII trimer|basement membrane|extracellular space|endoplasmic reticulum lumen|ER to Golgi vesicle-mediated transport|cell adhesion|epidermis development|COPII-coated ER to Golgi transport vesicle|extracellular matrix organization|collagen catabolic process|endoplasmic reticulum-Golgi intermediate compart…	path:hsa04974	Protein digestion and absorption
hsa-miR-1180-3p	NM_000512.4	155	-30.18	155	-30.18	479	22	2380	7	GALNS	GeneID:2588,Genbank:NM_001323543.1,HGNC:HGNC:4122,MIM:612222	galactosamine (N-acetyl)-6-sulfatase	GO:0003943,GO:0005576,GO:0008484,GO:0035578,GO:0042340,GO:0043202,GO:0043312,GO:0043890,GO:0046872,GO:0070062	N-acetylgalactosamine-4-sulfatase activity|extracellular region|sulfuric ester hydrolase activity|azurophil granule lumen|keratan sulfate catabolic process|lysosomal lumen|neutrophil degranulation|N-acetylgalactosamine-6-sulfatase activity|metal ion binding|extracellular exosome	path:hsa00531,path:hsa04142	Glycosaminoglycan degradation|Lysosome
hsa-miR-1180-3p	NM_000681.3	162	-33.94	162	-33.94	627	22	3889	903	ADRA2A	GeneID:150,Genbank:NM_000681.3,HGNC:HGNC:281,MIM:104210	adrenoceptor alpha 2A			path:hsa04022,path:hsa04080	cGMP-PKG signaling pathway|Neuroactive ligand-receptor interaction
hsa-miR-1180-3p	NM_000979.3	159	-30.83	159	-30.83	903	22	893	770	RPL18	GeneID:6141,Genbank:NM_001270490.1,HGNC:HGNC:10310,MIM:604179	ribosomal protein L18	GO:0000184,GO:0003723,GO:0003735,GO:0005634,GO:0005730,GO:0005783,GO:0005829,GO:0005925,GO:0006364,GO:0006412,GO:0006413,GO:0006614,GO:0016020,GO:0019083,GO:0022625	nuclear-transcribed mRNA catabolic process, nonsense-mediated decay|RNA binding|structural constituent of ribosome|nucleus|nucleolus|endoplasmic reticulum|cytosol|focal adhesion|rRNA processing|translation|translational initiation|SRP-dependent cotranslational protein targeting to membrane|membrane|viral transcription|cytosolic large ribosomal subunit	path:hsa03010	Ribosome
hsa-miR-1180-3p	NM_001002811.2	166	-31.7	166	-31.7	1173	22	5688	149	PDE4DIP	GeneID:9659,Genbank:NM_001350521.1,HGNC:HGNC:15580,MIM:608117	phosphodiesterase 4D interacting protein
hsa-miR-1180-3p	NM_001005498.3	162	-30.96	162	-30.96	1648	22	3453	264	RHBDF2	GeneID:79651,Genbank:XM_011525250.2,HGNC:HGNC:20788,MIM:614404	rhomboid 5 homolog 2	GO:0005789,GO:0005886,GO:0006508,GO:0015031,GO:0016021,GO:0019838,GO:0042058,GO:0050708,GO:0050709	endoplasmic reticulum membrane|plasma membrane|proteolysis|protein transport|integral component of membrane|growth factor binding|regulation of epidermal growth factor receptor signaling pathway|regulation of protein secretion|negative regulation of protein secretion
hsa-miR-1180-3p	NM_001012478.1	160	-31.11	160	-31.11	2217	22	3136	941	U2AF2	GeneID:11338,Genbank:NM_007279.2,HGNC:HGNC:23156,MIM:191318	U2 small nuclear RNA auxiliary factor 2	GO:0000243,GO:0000398,GO:0003723,GO:0005634,GO:0005654,GO:0005681,GO:0006369,GO:0006397,GO:0006405,GO:0006406,GO:0008187,GO:0016607,GO:0019899,GO:0030628,GO:0031124,GO:0031397,GO:0033120,GO:0048025,GO:0070742,GO:0071004,GO:0089701,GO:1903146,GO:1903955	commitment complex|mRNA splicing, via spliceosome|RNA binding|nucleus|nucleoplasm|spliceosomal complex|termination of RNA polymerase II transcription|mRNA processing|RNA export from nucleus|mRNA export from nucleus|poly-pyrimidine tract binding|nuclear speck|enzyme binding|pre-mRNA 3'-splice site binding|mRNA 3'-end processing|negative regulation of protein ubiquitination|positive regulation of R…	path:hsa03040	Spliceosome
hsa-miR-1180-3p	NM_001012759.2	175	-34.51	175	-34.51	2262	22	1793	1660	CTU2	GeneID:348180,Genbank:NM_001318507.1,HGNC:HGNC:28005,MIM:617057	cytosolic thiouridylase subunit 2	GO:0000049,GO:0002098,GO:0002143,GO:0005829,GO:0006400,GO:0016783,GO:0034227,GO:0043234	tRNA binding|tRNA wobble uridine modification|tRNA wobble position uridine thiolation|cytosol|tRNA modification|sulfurtransferase activity|tRNA thio-modification|protein complex	path:hsa04122	Sulfur relay system
hsa-miR-1180-3p	NM_001012762.2	175	-34.51	175	-34.51	2264	22	1734	1601	CTU2	GeneID:348180,Genbank:NM_001318507.1,HGNC:HGNC:28005,MIM:617057	cytosolic thiouridylase subunit 2	GO:0000049,GO:0002098,GO:0002143,GO:0005829,GO:0006400,GO:0016783,GO:0034227,GO:0043234	tRNA binding|tRNA wobble uridine modification|tRNA wobble position uridine thiolation|cytosol|tRNA modification|sulfurtransferase activity|tRNA thio-modification|protein complex	path:hsa04122	Sulfur relay system
hsa-miR-1180-3p	NM_001018.4	161	-32.78	161	-32.78	2539	22	550	262	RPS15	GeneID:6209,Genbank:NM_001018.4,HGNC:HGNC:10388,MIM:180535	ribosomal protein S15	GO:0000028,GO:0003723,GO:0003735,GO:0006412,GO:0022627,GO:0098556	ribosomal small subunit assembly|RNA binding|structural constituent of ribosome|translation|cytosolic small ribosomal subunit|cytoplasmic side of rough endoplasmic reticulum membrane	path:hsa03010	Ribosome
hsa-miR-1180-3p	NM_001024940.2	168	-30.16	168	-30.16	2710	22	2049	1459	TRIM17	GeneID:51127,Genbank:XM_011544210.3,HGNC:HGNC:13430,MIM:606123	tripartite motif containing 17	GO:0004842,GO:0005622,GO:0006914,GO:0008270,GO:0030674,GO:0032880,GO:0051865	ubiquitin-protein transferase activity|intracellular|autophagy|zinc ion binding|protein binding, bridging|regulation of protein localization|protein autoubiquitination
hsa-miR-1180-3p	NM_001024943.1	161	-30.37	161	-30.37	2711	22	2061	556	ASL	GeneID:435,Genbank:NM_000048.3,HGNC:HGNC:746,MIM:608310	argininosuccinate lyase	GO:0000050,GO:0004056,GO:0005737,GO:0005829,GO:0042450,GO:0042802,GO:0070062	urea cycle|argininosuccinate lyase activity|cytoplasm|cytosol|arginine biosynthetic process via ornithine|identical protein binding|extracellular exosome	path:hsa00220,path:hsa00250	Arginine biosynthesis|Alanine, aspartate and glutamate metabolism
hsa-miR-1180-3p	NM_001024944.1	161	-30.37	161	-30.37	2712	22	2001	556	ASL	GeneID:435,Genbank:NM_000048.3,HGNC:HGNC:746,MIM:608310	argininosuccinate lyase	GO:0000050,GO:0004056,GO:0005737,GO:0005829,GO:0042450,GO:0042802,GO:0070062	urea cycle|argininosuccinate lyase activity|cytoplasm|cytosol|arginine biosynthetic process via ornithine|identical protein binding|extracellular exosome	path:hsa00220,path:hsa00250	Arginine biosynthesis|Alanine, aspartate and glutamate metabolism
hsa-miR-1180-3p	NM_001024946.1	161	-30.37	161	-30.37	2713	22	1983	556	ASL	GeneID:435,Genbank:NM_000048.3,HGNC:HGNC:746,MIM:608310	argininosuccinate lyase	GO:0000050,GO:0004056,GO:0005737,GO:0005829,GO:0042450,GO:0042802,GO:0070062	urea cycle|argininosuccinate lyase activity|cytoplasm|cytosol|arginine biosynthetic process via ornithine|identical protein binding|extracellular exosome	path:hsa00220,path:hsa00250	Arginine biosynthesis|Alanine, aspartate and glutamate metabolism
hsa-miR-1180-3p	NM_001039920.2	163	-33.52	163	-33.52	3362	22	2903	671	ZNF384	GeneID:171017,Genbank:NM_001039920.2,HGNC:HGNC:11955,MIM:609951	zinc finger protein 384
hsa-miR-1180-3p	NM_001040442.1	168	-30.06	168	-30.06	3480	22	672	141	FABP6	GeneID:2172,Genbank:NM_001130958.1,HGNC:HGNC:3561,MIM:600422	fatty acid binding protein 6	GO:0005737,GO:0005829,GO:0006629,GO:0008285,GO:0008289,GO:0015721,GO:0016020,GO:0019433,GO:0032052	cytoplasm|cytosol|lipid metabolic process|negative regulation of cell proliferation|lipid binding|bile acid and bile salt transport|membrane|triglyceride catabolic process|bile acid binding	path:hsa03320	PPAR signaling pathway
hsa-miR-1180-3p	NM_001042428.1	159	-31.3	159	-31.3	3584	22	2009	1224	ZNF205	GeneID:7755,Genbank:NM_003456.2,HGNC:HGNC:12996,MIM:603436	zinc finger protein 205	GO:0000122,GO:0000977,GO:0001227,GO:0005634,GO:0005739,GO:0006351,GO:0006355,GO:0008270,GO:0010729,GO:1901030	negative regulation of transcription from RNA polymerase II promoter|RNA polymerase II regulatory region sequence-specific DNA binding|transcriptional repressor activity, RNA polymerase II transcription regulatory region sequence-specific DNA binding|nucleus|mitochondrion|transcription, DNA-templated|regulation of transcription, DNA-templated|zinc ion binding|positive regulation of hydrogen perox…
hsa-miR-1180-3p	NM_001048172.1	155	-30.89	155	-30.89	3758	22	1794	89	MUTYH	GeneID:4595,Genbank:NM_001350651.1,HGNC:HGNC:7527,MIM:604933	mutY DNA glycosylase			path:hsa03410	Base excision repair
hsa-miR-1180-3p	NM_001048173.1	155	-30.89	155	-30.89	3759	22	1791	89	MUTYH	GeneID:4595,Genbank:NM_001350651.1,HGNC:HGNC:7527,MIM:604933	mutY DNA glycosylase			path:hsa03410	Base excision repair
hsa-miR-1180-3p	NM_001077180.2	156	-30.81	156	-30.81	3831	22	3264	45	METTL9	GeneID:51108,Genbank:NM_001288659.1,HGNC:HGNC:24586,MIM:609388	methyltransferase like 9
hsa-miR-1180-3p	NM_001077186.1	162	-34.16	162	-34.16	3835	22	6831	3365	MYH14	GeneID:79784,Genbank:XM_011527320.2,HGNC:HGNC:23212,MIM:608568	myosin heavy chain 14	GO:0000146,GO:0001725,GO:0003009,GO:0005516,GO:0005524,GO:0005829,GO:0005903,GO:0007519,GO:0007605,GO:0008360,GO:0016020,GO:0016460,GO:0016887,GO:0019228,GO:0030048,GO:0030424,GO:0030426,GO:0030898,GO:0031032,GO:0042641,GO:0043209,GO:0051015,GO:0070062,GO:0070584,GO:0071625,GO:0097513	microfilament motor activity|stress fiber|skeletal muscle contraction|calmodulin binding|ATP binding|cytosol|brush border|skeletal muscle tissue development|sensory perception of sound|regulation of cell shape|membrane|myosin II complex|ATPase activity|neuronal action potential|actin filament-based movement|axon|growth cone|actin-dependent ATPase activity|actomyosin structure organization|actomyo…	path:hsa04530,path:hsa04810,path:hsa05132	Tight junction|Regulation of actin cytoskeleton|Salmonella infection
hsa-miR-1180-3p	NM_001077241.2	180	-35.76	180	-35.76	3850	22	2252	1171	SLC25A45	GeneID:283130,Genbank:NM_001278251.2,HGNC:HGNC:27442,MIM:610825	solute carrier family 25 member 45	GO:0005743,GO:0006839,GO:0016021,GO:0022857	mitochondrial inner membrane|mitochondrial transport|integral component of membrane|transmembrane transporter activity
hsa-miR-1180-3p	NM_001080424.2	168	-33.87	168	-33.87	4084	22	6731	210	KDM6B	GeneID:23135,Genbank:XM_005256549.3,HGNC:HGNC:29012,MIM:611577	lysine demethylase 6B	GO:0002437,GO:0003682,GO:0005634,GO:0005654,GO:0006338,GO:0008013,GO:0014823,GO:0021766,GO:0032452,GO:0043565,GO:0045165,GO:0045446,GO:0045944,GO:0046872,GO:0048333,GO:0051213,GO:0055007,GO:0060992,GO:0070301,GO:0071557,GO:0071558	inflammatory response to antigenic stimulus|chromatin binding|nucleus|nucleoplasm|chromatin remodeling|beta-catenin binding|response to activity|hippocampus development|histone demethylase activity|sequence-specific DNA binding|cell fate commitment|endothelial cell differentiation|positive regulation of transcription from RNA polymerase II promoter|metal ion binding|mesodermal cell differentiatio…
hsa-miR-1180-3p	NM_001098832.1	162	-33.52	162	-33.52	4596	22	2905	534	FAM104A	GeneID:84923,Genbank:NM_001289410.1,HGNC:HGNC:25918	family with sequence similarity 104 member A
hsa-miR-1180-3p	NM_001100122.1	173	-36.28	173	-36.28	4747	22	4616	789	SBNO2	GeneID:22904,Genbank:NM_014963.2,HGNC:HGNC:29158,MIM:615729	strawberry notch homolog 2
hsa-miR-1180-3p	NM_001110503.2	154	-30.83	154	-30.83	5062	22	2788	103	TMEM87A	GeneID:25963,Genbank:NM_001286487.1,HGNC:HGNC:24522	transmembrane protein 87A	GO:0005829,GO:0016021,GO:0032580,GO:0042147	cytosol|integral component of membrane|Golgi cisterna membrane|retrograde transport, endosome to Golgi
hsa-miR-1180-3p	NM_001113567.2	162	-30.22	162	-30.22	5171	22	2831	555	LRRC75A	GeneID:388341,Genbank:NM_207387.3,HGNC:HGNC:32403	leucine rich repeat containing 75A
hsa-miR-1180-3p	NM_001122957.2	165	-31.79	165	-31.79	5325	22	2237	874	BCKDK	GeneID:10295,Genbank:NM_001122957.2,HGNC:HGNC:16902,MIM:614901	branched chain ketoacid dehydrogenase kinase
hsa-miR-1180-3p	NM_001123226.1	162	-30.33	162	-30.33	5340	22	3048	1495	MTO1	GeneID:25821,Genbank:NM_133645.2,HGNC:HGNC:19261,MIM:614667	mitochondrial tRNA translation optimization 1	GO:0003723,GO:0005739,GO:0030488,GO:0050660,GO:0070899	RNA binding|mitochondrion|tRNA methylation|flavin adenine dinucleotide binding|mitochondrial tRNA wobble uridine modification
hsa-miR-1180-3p	NM_001127464.2	169	-30.93	169	-30.93	5517	22	13203	749	ZNF469	GeneID:84627,Genbank:XM_017023785.1,HGNC:HGNC:23216,MIM:612078	zinc finger protein 469	GO:0003677,GO:0005634,GO:0006351,GO:0006355,GO:0046872	DNA binding|nucleus|transcription, DNA-templated|regulation of transcription, DNA-templated|metal ion binding
hsa-miR-1180-3p	NM_001130029.1	170	-31.37	170	-31.37	5822	22	2171	738	RELL2	GeneID:285613,Genbank:NM_173828.4,HGNC:HGNC:26902,MIM:611213	RELT like 2	GO:0005518,GO:0005604,GO:0005886,GO:0010811,GO:0016021	collagen binding|basement membrane|plasma membrane|positive regulation of cell-substrate adhesion|integral component of membrane
hsa-miR-1180-3p	NM_001130702.2	172	-31.27	172	-31.27	5955	22	1378	1	BSCL2	GeneID:26580,Genbank:NM_001122955.3,HGNC:HGNC:15832,MIM:606158	BSCL2, seipin lipid droplet biogenesis associated	GO:0016042,GO:0019915,GO:0030176,GO:0034389,GO:0045444,GO:0050995	lipid catabolic process|lipid storage|integral component of endoplasmic reticulum membrane|lipid particle organization|fat cell differentiation|negative regulation of lipid catabolic process
hsa-miR-1180-3p	NM_001130958.1	168	-30.06	168	-30.06	6023	22	752	221	FABP6	GeneID:2172,Genbank:NM_001130958.1,HGNC:HGNC:3561,MIM:600422	fatty acid binding protein 6	GO:0005737,GO:0005829,GO:0006629,GO:0008285,GO:0008289,GO:0015721,GO:0016020,GO:0019433,GO:0032052	cytoplasm|cytosol|lipid metabolic process|negative regulation of cell proliferation|lipid binding|bile acid and bile salt transport|membrane|triglyceride catabolic process|bile acid binding	path:hsa03320	PPAR signaling pathway
hsa-miR-1180-3p	NM_001134658.2	167	-32.93	167	-32.93	6163	22	3496	223	SLC35G1	GeneID:159371,Genbank:XM_011539373.3,HGNC:HGNC:26607,MIM:617167	solute carrier family 35 member G1	GO:0005789,GO:0005886,GO:0016021,GO:0051480,GO:1990034	endoplasmic reticulum membrane|plasma membrane|integral component of membrane|regulation of cytosolic calcium ion concentration|calcium ion export across plasma membrane
hsa-miR-1180-3p	NM_001135176.1	166	-30.92	166	-30.92	6266	22	3724	7	NEDD1	GeneID:121441,Genbank:XM_017018801.2,HGNC:HGNC:7723,MIM:600372	neural precursor cell expressed, developmentally down-regulated 1	GO:0000086,GO:0000242,GO:0000922,GO:0005813,GO:0005814,GO:0005829,GO:0010389,GO:0036064,GO:0045177,GO:0051301,GO:0071539,GO:0097711	G2/M transition of mitotic cell cycle|pericentriolar material|spindle pole|centrosome|centriole|cytosol|regulation of G2/M transition of mitotic cell cycle|ciliary basal body|apical part of cell|cell division|protein localization to centrosome|ciliary basal body-plasma membrane docking
hsa-miR-1180-3p	NM_001135177.1	166	-30.92	166	-30.92	6267	22	3738	7	NEDD1	GeneID:121441,Genbank:XM_017018801.2,HGNC:HGNC:7723,MIM:600372	neural precursor cell expressed, developmentally down-regulated 1	GO:0000086,GO:0000242,GO:0000922,GO:0005813,GO:0005814,GO:0005829,GO:0010389,GO:0036064,GO:0045177,GO:0051301,GO:0071539,GO:0097711	G2/M transition of mitotic cell cycle|pericentriolar material|spindle pole|centrosome|centriole|cytosol|regulation of G2/M transition of mitotic cell cycle|ciliary basal body|apical part of cell|cell division|protein localization to centrosome|ciliary basal body-plasma membrane docking
hsa-miR-1180-3p	NM_001135734.2	163	-33.52	163	-33.52	6374	22	3251	836	ZNF384	GeneID:171017,Genbank:NM_001039920.2,HGNC:HGNC:11955,MIM:609951	zinc finger protein 384
hsa-miR-1180-3p	NM_001142446.1	161	-34.22	161	-34.22	6782	22	8486	2059	ANK1	GeneID:286,Genbank:NM_001142446.1,HGNC:HGNC:492,MIM:612641	ankyrin 1			path:hsa05205	Proteoglycans in cancer
hsa-miR-1180-3p	NM_001142602.1	165	-30.84	165	-30.84	6881	22	1884	2	SPHK1	GeneID:8877,Genbank:NM_001355139.1,HGNC:HGNC:11240,MIM:603730	sphingosine kinase 1	GO:0000287,GO:0001568,GO:0003677,GO:0003951,GO:0005516,GO:0005524,GO:0005634,GO:0005737,GO:0005829,GO:0005886,GO:0006457,GO:0006670,GO:0006954,GO:0007165,GO:0007420,GO:0008481,GO:0010800,GO:0010803,GO:0017050,GO:0019722,GO:0030148,GO:0030307,GO:0030335,GO:0031398,GO:0032651,GO:0035556,GO:0038036,GO:0042346,GO:0043066,GO:0045766,GO:0045931,GO:0045987,GO:0046512,GO:0046521,GO:0048146,GO:0051092,GO:…	magnesium ion binding|blood vessel development|DNA binding|NAD+ kinase activity|calmodulin binding|ATP binding|nucleus|cytoplasm|cytosol|plasma membrane|protein folding|sphingosine metabolic process|inflammatory response|signal transduction|brain development|sphinganine kinase activity|positive regulation of peptidyl-threonine phosphorylation|regulation of tumor necrosis factor-mediated signaling…	path:hsa00600,path:hsa04020,path:hsa04071,path:hsa04072,path:hsa04370,path:hsa04371,path:hsa04666,path:hsa05152	Sphingolipid metabolism|Calcium signaling pathway|Sphingolipid signaling pathway|Phospholipase D signaling pathway|VEGF signaling pathway|Apelin signaling pathway|Fc gamma R-mediated phagocytosis|Tuberculosis
hsa-miR-1180-3p	NM_001142853.2	163	-34.63	163	-34.63	6960	22	1464	67	HES6	GeneID:55502,Genbank:NM_001142853.2,HGNC:HGNC:18254,MIM:610331	hes family bHLH transcription factor 6	GO:0000977,GO:0001227,GO:0003700,GO:0003712,GO:0005634,GO:0005667,GO:0006351,GO:0006355,GO:0007399,GO:0008134,GO:0030154,GO:0046983	RNA polymerase II regulatory region sequence-specific DNA binding|transcriptional repressor activity, RNA polymerase II transcription regulatory region sequence-specific DNA binding|DNA binding transcription factor activity|transcription cofactor activity|nucleus|transcription factor complex|transcription, DNA-templated|regulation of transcription, DNA-templated|nervous system development|transcr…	path:hsa05165	Human papillomavirus infection
hsa-miR-1180-3p	NM_001142933.1	154	-30.28	154	-30.28	6971	22	2528	459	CHAT	GeneID:1103,Genbank:NM_020984.3,HGNC:HGNC:1912,MIM:118490	choline O-acetyltransferase			path:hsa00564,path:hsa04725	Glycerophospholipid metabolism|Cholinergic synapse
hsa-miR-1180-3p	NM_001142934.1	154	-30.28	154	-30.28	6972	22	2528	459	CHAT	GeneID:1103,Genbank:NM_020984.3,HGNC:HGNC:1912,MIM:118490	choline O-acetyltransferase			path:hsa00564,path:hsa04725	Glycerophospholipid metabolism|Cholinergic synapse
hsa-miR-1180-3p	NM_001144884.1	156	-30.64	156	-30.64	7208	22	7918	1	SLC30A7	GeneID:148867,Genbank:NM_001144884.1,HGNC:HGNC:19306,MIM:611149	solute carrier family 30 member 7	GO:0005385,GO:0005737,GO:0005794,GO:0010043,GO:0016020,GO:0016021,GO:0031410,GO:0031982,GO:0032119,GO:0048471,GO:0061088,GO:0070062	zinc ion transmembrane transporter activity|cytoplasm|Golgi apparatus|response to zinc ion|membrane|integral component of membrane|cytoplasmic vesicle|vesicle|sequestering of zinc ion|perinuclear region of cytoplasm|regulation of sequestering of zinc ion|extracellular exosome
hsa-miR-1180-3p	NM_001145542.1	164	-30.41	164	-30.41	7576	22	2605	1494	ZSCAN18	GeneID:65982,Genbank:XM_006723335.2,HGNC:HGNC:21037	zinc finger and SCAN domain containing 18	GO:0000981,GO:0003677,GO:0005634,GO:0006351,GO:0046872	RNA polymerase II transcription factor activity, sequence-specific DNA binding|DNA binding|nucleus|transcription, DNA-templated|metal ion binding
hsa-miR-1180-3p	NM_001145543.1	164	-30.41	164	-30.41	7577	22	2716	1605	ZSCAN18	GeneID:65982,Genbank:XM_006723335.2,HGNC:HGNC:21037	zinc finger and SCAN domain containing 18	GO:0000981,GO:0003677,GO:0005634,GO:0006351,GO:0046872	RNA polymerase II transcription factor activity, sequence-specific DNA binding|DNA binding|nucleus|transcription, DNA-templated|metal ion binding
hsa-miR-1180-3p	NM_001145544.1	164	-30.41	164	-30.41	7578	22	2250	1139	ZSCAN18	GeneID:65982,Genbank:XM_006723335.2,HGNC:HGNC:21037	zinc finger and SCAN domain containing 18	GO:0000981,GO:0003677,GO:0005634,GO:0006351,GO:0046872	RNA polymerase II transcription factor activity, sequence-specific DNA binding|DNA binding|nucleus|transcription, DNA-templated|metal ion binding
hsa-miR-1180-3p	NM_001145809.1	162	-34.16	162	-34.16	7651	22	6930	3464	MYH14	GeneID:79784,Genbank:XM_011527320.2,HGNC:HGNC:23212,MIM:608568	myosin heavy chain 14	GO:0000146,GO:0001725,GO:0003009,GO:0005516,GO:0005524,GO:0005829,GO:0005903,GO:0007519,GO:0007605,GO:0008360,GO:0016020,GO:0016460,GO:0016887,GO:0019228,GO:0030048,GO:0030424,GO:0030426,GO:0030898,GO:0031032,GO:0042641,GO:0043209,GO:0051015,GO:0070062,GO:0070584,GO:0071625,GO:0097513	microfilament motor activity|stress fiber|skeletal muscle contraction|calmodulin binding|ATP binding|cytosol|brush border|skeletal muscle tissue development|sensory perception of sound|regulation of cell shape|membrane|myosin II complex|ATPase activity|neuronal action potential|actin filament-based movement|axon|growth cone|actin-dependent ATPase activity|actomyosin structure organization|actomyo…	path:hsa04530,path:hsa04810,path:hsa05132	Tight junction|Regulation of actin cytoskeleton|Salmonella infection
hsa-miR-1180-3p	NM_001162499.1	175	-32.13	175	-32.13	8201	22	4599	427	CAND2	GeneID:23066,Genbank:XM_011533503.2,HGNC:HGNC:30689,MIM:610403	cullin associated and neddylation dissociated 2 (putative)	GO:0005622,GO:0005634,GO:0006351,GO:0010265,GO:0016567,GO:0017025,GO:0045893	intracellular|nucleus|transcription, DNA-templated|SCF complex assembly|protein ubiquitination|TBP-class protein binding|positive regulation of transcription, DNA-templated
hsa-miR-1180-3p	NM_001164680.1	173	-33.01	173	-33.01	8491	22	1777	1257	CCR3	GeneID:1232,Genbank:XM_017005686.1,HGNC:HGNC:1604,MIM:601268	C-C motif chemokine receptor 3			path:hsa04060,path:hsa04062,path:hsa05163,path:hsa05167,path:hsa05203	Cytokine-cytokine receptor interaction|Chemokine signaling pathway|Human cytomegalovirus infection|Kaposi sarcoma-associated herpesvirus infection|Viral carcinogenesis
hsa-miR-1180-3p	NM_001168241.1	161	-33.61	161	-33.61	8930	22	4173	1500	GAREM2	GeneID:150946,Genbank:NM_001168241.1,HGNC:HGNC:27172	GRB2 associated regulator of MAPK1 subtype 2	GO:0070062	extracellular exosome
hsa-miR-1180-3p	NM_001170464.2	164	-37.15	164	-37.15	9041	22	4722	422	CDK17	GeneID:5128,Genbank:NM_002595.4,HGNC:HGNC:8750,MIM:603440	cyclin dependent kinase 17	GO:0004672,GO:0004674,GO:0005524,GO:0005634,GO:0005737,GO:0006468	protein kinase activity|protein serine/threonine kinase activity|ATP binding|nucleus|cytoplasm|protein phosphorylation
hsa-miR-1180-3p	NM_001178100.1	162	-31.09	162	-31.09	9733	22	944	365	CD8B	GeneID:926,Genbank:NM_001178100.1,HGNC:HGNC:1707,MIM:186730	CD8b molecule			path:hsa04514,path:hsa04612,path:hsa04640,path:hsa04660,path:hsa05340	Cell adhesion molecules (CAMs)|Antigen processing and presentation|Hematopoietic cell lineage|T cell receptor signaling pathway|Primary immunodeficiency
hsa-miR-1180-3p	NM_001178117.1	163	-30.41	163	-30.41	9746	22	2674	382	MINPP1	GeneID:9562,Genbank:NM_004897.4,HGNC:HGNC:7102,MIM:605391	multiple inositol-polyphosphate phosphatase 1	GO:0001503,GO:0003993,GO:0005783,GO:0005788,GO:0006797,GO:0030282,GO:0030351,GO:0034417,GO:0043647,GO:0051717,GO:0052745,GO:0052826,GO:0070062,GO:0101006	ossification|acid phosphatase activity|endoplasmic reticulum|endoplasmic reticulum lumen|polyphosphate metabolic process|bone mineralization|inositol-1,3,4,5,6-pentakisphosphate 3-phosphatase activity|bisphosphoglycerate 3-phosphatase activity|inositol phosphate metabolic process|inositol-1,3,4,5-tetrakisphosphate 3-phosphatase activity|inositol phosphate phosphatase activity|inositol hexakisphos…	path:hsa00010,path:hsa00562	Glycolysis / Gluconeogenesis|Inositol phosphate metabolism
hsa-miR-1180-3p	NM_001191033.1	161	-33.61	161	-33.61	10165	22	5169	2895	GAREM2	GeneID:150946,Genbank:NM_001168241.1,HGNC:HGNC:27172	GRB2 associated regulator of MAPK1 subtype 2	GO:0070062	extracellular exosome
hsa-miR-1180-3p	NM_001193452.1	164	-30.4	164	-30.4	10261	22	1437	759	NUDT16L1	GeneID:84309,Genbank:XM_005255633.5,HGNC:HGNC:28154,MIM:617338	nudix hydrolase 16 like 1	GO:0003723,GO:0005634,GO:0016787,GO:0030515,GO:2001033	RNA binding|nucleus|hydrolase activity|snoRNA binding|negative regulation of double-strand break repair via nonhomologous end joining	path:hsa05205	Proteoglycans in cancer
hsa-miR-1180-3p	NM_001195278.1	158	-33.66	158	-33.66	10443	22	10558	4904	TMEM178B	GeneID:100507421,Genbank:XM_011515705.2,HGNC:HGNC:44112	transmembrane protein 178B	GO:0016021	integral component of membrane
hsa-miR-1180-3p	NM_001199196.1	160	-33.93	160	-33.93	10889	22	2505	264	ARMC6	GeneID:93436,Genbank:NM_001199196.1,HGNC:HGNC:25049	armadillo repeat containing 6	GO:0002244,GO:0005829	hematopoietic progenitor cell differentiation|cytosol
hsa-miR-1180-3p	NM_001205.2	167	-32.13	167	-32.13	11605	22	1259	650	BNIP1	GeneID:662,Genbank:NM_013979.2,HGNC:HGNC:1082,MIM:603291	BCL2 interacting protein 1			path:hsa04130	SNARE interactions in vesicular transport
hsa-miR-1180-3p	NM_001207055.1	157	-30.58	157	-30.58	11845	22	3978	1734	DNMT3B	GeneID:1789,Genbank:NM_006892.3,HGNC:HGNC:2979,MIM:602900	DNA methyltransferase 3 beta			path:hsa00270,path:hsa05206	Cysteine and methionine metabolism|MicroRNAs in cancer
hsa-miR-1180-3p	NM_001207056.1	157	-30.58	157	-30.58	11846	22	3876	1632	DNMT3B	GeneID:1789,Genbank:NM_006892.3,HGNC:HGNC:2979,MIM:602900	DNA methyltransferase 3 beta			path:hsa00270,path:hsa05206	Cysteine and methionine metabolism|MicroRNAs in cancer
hsa-miR-1180-3p	NM_001242412.1	180	-38.06	180	-38.06	11975	22	5622	74	AHRR	GeneID:57491,Genbank:NM_020731.4,HGNC:HGNC:346,MIM:606517	aryl-hydrocarbon receptor repressor	GO:0001191,GO:0003677,GO:0005654,GO:0005829,GO:0006351,GO:0006805,GO:0009410,GO:0046983	transcriptional repressor activity, RNA polymerase II transcription factor binding|DNA binding|nucleoplasm|cytosol|transcription, DNA-templated|xenobiotic metabolic process|response to xenobiotic stimulus|protein dimerization activity
hsa-miR-1180-3p	NM_001242786.1	162	-30.96	162	-30.96	12100	22	3452	430	BRF1	GeneID:2972,Genbank:NM_001242787.1,HGNC:HGNC:11551,MIM:604902	BRF1, RNA polymerase III transcription initiation factor subunit	GO:0000126,GO:0001026,GO:0005654,GO:0006383,GO:0006384,GO:0009303,GO:0009304,GO:0017025,GO:0045945,GO:0046872,GO:0070897	transcription factor TFIIIB complex|TFIIIB-type transcription factor activity|nucleoplasm|transcription from RNA polymerase III promoter|transcription initiation from RNA polymerase III promoter|rRNA transcription|tRNA transcription|TBP-class protein binding|positive regulation of transcription from RNA polymerase III promoter|metal ion binding|DNA-templated transcriptional preinitiation complex …
hsa-miR-1180-3p	NM_001242787.1	162	-30.96	162	-30.96	12101	22	3386	430	BRF1	GeneID:2972,Genbank:NM_001242787.1,HGNC:HGNC:11551,MIM:604902	BRF1, RNA polymerase III transcription initiation factor subunit	GO:0000126,GO:0001026,GO:0005654,GO:0006383,GO:0006384,GO:0009303,GO:0009304,GO:0017025,GO:0045945,GO:0046872,GO:0070897	transcription factor TFIIIB complex|TFIIIB-type transcription factor activity|nucleoplasm|transcription from RNA polymerase III promoter|transcription initiation from RNA polymerase III promoter|rRNA transcription|tRNA transcription|TBP-class protein binding|positive regulation of transcription from RNA polymerase III promoter|metal ion binding|DNA-templated transcriptional preinitiation complex …
hsa-miR-1180-3p	NM_001242788.1	162	-30.96	162	-30.96	12102	22	3596	640	BRF1	GeneID:2972,Genbank:NM_001242787.1,HGNC:HGNC:11551,MIM:604902	BRF1, RNA polymerase III transcription initiation factor subunit	GO:0000126,GO:0001026,GO:0005654,GO:0006383,GO:0006384,GO:0009303,GO:0009304,GO:0017025,GO:0045945,GO:0046872,GO:0070897	transcription factor TFIIIB complex|TFIIIB-type transcription factor activity|nucleoplasm|transcription from RNA polymerase III promoter|transcription initiation from RNA polymerase III promoter|rRNA transcription|tRNA transcription|TBP-class protein binding|positive regulation of transcription from RNA polymerase III promoter|metal ion binding|DNA-templated transcriptional preinitiation complex …
hsa-miR-1180-3p	NM_001242790.1	162	-30.96	162	-30.96	12104	22	1170	721	BRF1	GeneID:2972,Genbank:NM_001242787.1,HGNC:HGNC:11551,MIM:604902	BRF1, RNA polymerase III transcription initiation factor subunit	GO:0000126,GO:0001026,GO:0005654,GO:0006383,GO:0006384,GO:0009303,GO:0009304,GO:0017025,GO:0045945,GO:0046872,GO:0070897	transcription factor TFIIIB complex|TFIIIB-type transcription factor activity|nucleoplasm|transcription from RNA polymerase III promoter|transcription initiation from RNA polymerase III promoter|rRNA transcription|tRNA transcription|TBP-class protein binding|positive regulation of transcription from RNA polymerase III promoter|metal ion binding|DNA-templated transcriptional preinitiation complex …
hsa-miR-1180-3p	NM_001242881.1	176	-36.3	176	-36.3	12189	22	2620	96	NAXD	GeneID:55739,Genbank:NM_001242882.1,HGNC:HGNC:25576,MIM:615910	NAD(P)HX dehydratase	GO:0005524,GO:0005739,GO:0047453,GO:0052855	ATP binding|mitochondrion|ATP-dependent NAD(P)H-hydrate dehydratase activity|ADP-dependent NAD(P)H-hydrate dehydratase activity
hsa-miR-1180-3p	NM_001242924.1	165	-30.4	165	-30.4	12231	22	2814	218	ZNF410	GeneID:57862,Genbank:NM_001242924.1,HGNC:HGNC:20144	zinc finger protein 410	GO:0003677,GO:0005634,GO:0006351,GO:0006355,GO:0046872	DNA binding|nucleus|transcription, DNA-templated|regulation of transcription, DNA-templated|metal ion binding
hsa-miR-1180-3p	NM_001242926.1	165	-30.4	165	-30.4	12233	22	2504	218	ZNF410	GeneID:57862,Genbank:NM_001242924.1,HGNC:HGNC:20144	zinc finger protein 410	GO:0003677,GO:0005634,GO:0006351,GO:0006355,GO:0046872	DNA binding|nucleus|transcription, DNA-templated|regulation of transcription, DNA-templated|metal ion binding
hsa-miR-1180-3p	NM_001242927.1	165	-30.4	165	-30.4	12234	22	2426	218	ZNF410	GeneID:57862,Genbank:NM_001242924.1,HGNC:HGNC:20144	zinc finger protein 410	GO:0003677,GO:0005634,GO:0006351,GO:0006355,GO:0046872	DNA binding|nucleus|transcription, DNA-templated|regulation of transcription, DNA-templated|metal ion binding
hsa-miR-1180-3p	NM_001242928.1	165	-30.4	165	-30.4	12235	22	2738	218	ZNF410	GeneID:57862,Genbank:NM_001242924.1,HGNC:HGNC:20144	zinc finger protein 410	GO:0003677,GO:0005634,GO:0006351,GO:0006355,GO:0046872	DNA binding|nucleus|transcription, DNA-templated|regulation of transcription, DNA-templated|metal ion binding
hsa-miR-1180-3p	NM_001252156.1	172	-30.12	172	-30.12	12725	22	5401	2430	GEMIN5	GeneID:25929,Genbank:NM_001252156.1,HGNC:HGNC:20043,MIM:607005	gem nuclear organelle associated protein 5	GO:0000340,GO:0000387,GO:0000398,GO:0003723,GO:0003730,GO:0005654,GO:0005737,GO:0005829,GO:0006412,GO:0006417,GO:0006461,GO:0016020,GO:0016604,GO:0017069,GO:0030619,GO:0030621,GO:0030622,GO:0032797,GO:0034718,GO:0034719,GO:0043022,GO:0051170,GO:0097504	RNA 7-methylguanosine cap binding|spliceosomal snRNP assembly|mRNA splicing, via spliceosome|RNA binding|mRNA 3'-UTR binding|nucleoplasm|cytoplasm|cytosol|translation|regulation of translation|protein complex assembly|membrane|nuclear body|snRNA binding|U1 snRNA binding|U4 snRNA binding|U4atac snRNA binding|SMN complex|SMN-Gemin2 complex|SMN-Sm protein complex|ribosome binding|nuclear import|Gemi…	path:hsa03013	RNA transport
hsa-miR-1180-3p	NM_001253379.2	165	-31.63	165	-31.63	12786	22	2743	478	RPL15	GeneID:6138,Genbank:NM_001253384.2,HGNC:HGNC:10306,MIM:604174	ribosomal protein L15	GO:0002181,GO:0003723,GO:0003735,GO:0005634,GO:0016020,GO:0022625,GO:0031672,GO:0045296,GO:0045471,GO:0070062	cytoplasmic translation|RNA binding|structural constituent of ribosome|nucleus|membrane|cytosolic large ribosomal subunit|A band|cadherin binding|response to ethanol|extracellular exosome	path:hsa03010	Ribosome
hsa-miR-1180-3p	NM_001253384.2	165	-31.63	165	-31.63	12790	22	4033	478	RPL15	GeneID:6138,Genbank:NM_001253384.2,HGNC:HGNC:10306,MIM:604174	ribosomal protein L15	GO:0002181,GO:0003723,GO:0003735,GO:0005634,GO:0016020,GO:0022625,GO:0031672,GO:0045296,GO:0045471,GO:0070062	cytoplasmic translation|RNA binding|structural constituent of ribosome|nucleus|membrane|cytosolic large ribosomal subunit|A band|cadherin binding|response to ethanol|extracellular exosome	path:hsa03010	Ribosome
hsa-miR-1180-3p	NM_001256046.1	161	-30.46	161	-30.46	12927	22	4628	243	C19orf12	GeneID:83636,Genbank:NM_001256047.1,HGNC:HGNC:25443,MIM:614297	chromosome 19 open reading frame 12	GO:0005739,GO:0005783,GO:0005829,GO:0006914,GO:0006915,GO:0006979,GO:0016021,GO:0031966,GO:0051560	mitochondrion|endoplasmic reticulum|cytosol|autophagy|apoptotic process|response to oxidative stress|integral component of membrane|mitochondrial membrane|mitochondrial calcium ion homeostasis
hsa-miR-1180-3p	NM_001256577.2	159	-30.99	159	-30.99	13181	22	2337	47	RPL10	GeneID:6134,Genbank:NM_001303625.1,HGNC:HGNC:10298,MIM:312173	ribosomal protein L10	GO:0000027,GO:0000122,GO:0003723,GO:0003735,GO:0005634,GO:0005737,GO:0005790,GO:0006412,GO:0006417,GO:0016020,GO:0022625,GO:0043066,GO:0043234,GO:0045182,GO:0097421,GO:1990403	ribosomal large subunit assembly|negative regulation of transcription from RNA polymerase II promoter|RNA binding|structural constituent of ribosome|nucleus|cytoplasm|smooth endoplasmic reticulum|translation|regulation of translation|membrane|cytosolic large ribosomal subunit|negative regulation of apoptotic process|protein complex|translation regulator activity|liver regeneration|embryonic brain…	path:hsa03010	Ribosome
hsa-miR-1180-3p	NM_001256580.2	159	-30.99	159	-30.99	13183	22	2392	47	RPL10	GeneID:6134,Genbank:NM_001303625.1,HGNC:HGNC:10298,MIM:312173	ribosomal protein L10	GO:0000027,GO:0000122,GO:0003723,GO:0003735,GO:0005634,GO:0005737,GO:0005790,GO:0006412,GO:0006417,GO:0016020,GO:0022625,GO:0043066,GO:0043234,GO:0045182,GO:0097421,GO:1990403	ribosomal large subunit assembly|negative regulation of transcription from RNA polymerase II promoter|RNA binding|structural constituent of ribosome|nucleus|cytoplasm|smooth endoplasmic reticulum|translation|regulation of translation|membrane|cytosolic large ribosomal subunit|negative regulation of apoptotic process|protein complex|translation regulator activity|liver regeneration|embryonic brain…	path:hsa03010	Ribosome
hsa-miR-1180-3p	NM_001256658.1	160	-31.58	160	-31.58	13218	22	2237	314	TEAD2	GeneID:8463,Genbank:NM_001256662.1,HGNC:HGNC:11715,MIM:601729	TEA domain transcription factor 2	GO:0001085,GO:0001134,GO:0001223,GO:0001570,GO:0001843,GO:0003143,GO:0003700,GO:0003705,GO:0005634,GO:0005654,GO:0005829,GO:0006355,GO:0006367,GO:0006461,GO:0030903,GO:0035329,GO:0043231,GO:0043565,GO:0044212,GO:0045893,GO:0045944,GO:0046982,GO:0048339,GO:0048368,GO:0048568,GO:0060548,GO:0071149,GO:0071300,GO:0097718,GO:2000736	RNA polymerase II transcription factor binding|transcription factor activity, transcription factor recruiting|transcription coactivator binding|vasculogenesis|neural tube closure|embryonic heart tube morphogenesis|DNA binding transcription factor activity|transcription factor activity, RNA polymerase II distal enhancer sequence-specific binding|nucleus|nucleoplasm|cytosol|regulation of transcript…	path:hsa04390,path:hsa04392	Hippo signaling pathway|Hippo signaling pathway - multiple species
hsa-miR-1180-3p	NM_001256659.1	160	-31.58	160	-31.58	13219	22	2193	270	TEAD2	GeneID:8463,Genbank:NM_001256662.1,HGNC:HGNC:11715,MIM:601729	TEA domain transcription factor 2	GO:0001085,GO:0001134,GO:0001223,GO:0001570,GO:0001843,GO:0003143,GO:0003700,GO:0003705,GO:0005634,GO:0005654,GO:0005829,GO:0006355,GO:0006367,GO:0006461,GO:0030903,GO:0035329,GO:0043231,GO:0043565,GO:0044212,GO:0045893,GO:0045944,GO:0046982,GO:0048339,GO:0048368,GO:0048568,GO:0060548,GO:0071149,GO:0071300,GO:0097718,GO:2000736	RNA polymerase II transcription factor binding|transcription factor activity, transcription factor recruiting|transcription coactivator binding|vasculogenesis|neural tube closure|embryonic heart tube morphogenesis|DNA binding transcription factor activity|transcription factor activity, RNA polymerase II distal enhancer sequence-specific binding|nucleus|nucleoplasm|cytosol|regulation of transcript…	path:hsa04390,path:hsa04392	Hippo signaling pathway|Hippo signaling pathway - multiple species
hsa-miR-1180-3p	NM_001256660.1	160	-31.58	160	-31.58	13220	22	2236	310	TEAD2	GeneID:8463,Genbank:NM_001256662.1,HGNC:HGNC:11715,MIM:601729	TEA domain transcription factor 2	GO:0001085,GO:0001134,GO:0001223,GO:0001570,GO:0001843,GO:0003143,GO:0003700,GO:0003705,GO:0005634,GO:0005654,GO:0005829,GO:0006355,GO:0006367,GO:0006461,GO:0030903,GO:0035329,GO:0043231,GO:0043565,GO:0044212,GO:0045893,GO:0045944,GO:0046982,GO:0048339,GO:0048368,GO:0048568,GO:0060548,GO:0071149,GO:0071300,GO:0097718,GO:2000736	RNA polymerase II transcription factor binding|transcription factor activity, transcription factor recruiting|transcription coactivator binding|vasculogenesis|neural tube closure|embryonic heart tube morphogenesis|DNA binding transcription factor activity|transcription factor activity, RNA polymerase II distal enhancer sequence-specific binding|nucleus|nucleoplasm|cytosol|regulation of transcript…	path:hsa04390,path:hsa04392	Hippo signaling pathway|Hippo signaling pathway - multiple species
hsa-miR-1180-3p	NM_001256661.1	160	-31.58	160	-31.58	13221	22	2211	285	TEAD2	GeneID:8463,Genbank:NM_001256662.1,HGNC:HGNC:11715,MIM:601729	TEA domain transcription factor 2	GO:0001085,GO:0001134,GO:0001223,GO:0001570,GO:0001843,GO:0003143,GO:0003700,GO:0003705,GO:0005634,GO:0005654,GO:0005829,GO:0006355,GO:0006367,GO:0006461,GO:0030903,GO:0035329,GO:0043231,GO:0043565,GO:0044212,GO:0045893,GO:0045944,GO:0046982,GO:0048339,GO:0048368,GO:0048568,GO:0060548,GO:0071149,GO:0071300,GO:0097718,GO:2000736	RNA polymerase II transcription factor binding|transcription factor activity, transcription factor recruiting|transcription coactivator binding|vasculogenesis|neural tube closure|embryonic heart tube morphogenesis|DNA binding transcription factor activity|transcription factor activity, RNA polymerase II distal enhancer sequence-specific binding|nucleus|nucleoplasm|cytosol|regulation of transcript…	path:hsa04390,path:hsa04392	Hippo signaling pathway|Hippo signaling pathway - multiple species
hsa-miR-1180-3p	NM_001256672.1	158	-30.65	158	-30.65	13228	22	2038	15	STOML1	GeneID:9399,Genbank:NM_001256676.1,HGNC:HGNC:14560,MIM:608326	stomatin like 1	GO:0005886,GO:0006869,GO:0016021,GO:0031902,GO:0045121	plasma membrane|lipid transport|integral component of membrane|late endosome membrane|membrane raft
hsa-miR-1180-3p	NM_001256673.1	158	-30.65	158	-30.65	13229	22	1891	15	STOML1	GeneID:9399,Genbank:NM_001256676.1,HGNC:HGNC:14560,MIM:608326	stomatin like 1	GO:0005886,GO:0006869,GO:0016021,GO:0031902,GO:0045121	plasma membrane|lipid transport|integral component of membrane|late endosome membrane|membrane raft
hsa-miR-1180-3p	NM_001256674.1	158	-30.65	158	-30.65	13230	22	1888	15	STOML1	GeneID:9399,Genbank:NM_001256676.1,HGNC:HGNC:14560,MIM:608326	stomatin like 1	GO:0005886,GO:0006869,GO:0016021,GO:0031902,GO:0045121	plasma membrane|lipid transport|integral component of membrane|late endosome membrane|membrane raft
hsa-miR-1180-3p	NM_001256675.1	158	-30.65	158	-30.65	13231	22	1828	15	STOML1	GeneID:9399,Genbank:NM_001256676.1,HGNC:HGNC:14560,MIM:608326	stomatin like 1	GO:0005886,GO:0006869,GO:0016021,GO:0031902,GO:0045121	plasma membrane|lipid transport|integral component of membrane|late endosome membrane|membrane raft
hsa-miR-1180-3p	NM_001256677.1	158	-30.65	158	-30.65	13233	22	2169	15	STOML1	GeneID:9399,Genbank:NM_001256676.1,HGNC:HGNC:14560,MIM:608326	stomatin like 1	GO:0005886,GO:0006869,GO:0016021,GO:0031902,GO:0045121	plasma membrane|lipid transport|integral component of membrane|late endosome membrane|membrane raft
hsa-miR-1180-3p	NM_001257359.1	166	-35.08	166	-35.08	13465	22	3232	980	SAMD14	GeneID:201191,Genbank:NM_001257359.1,HGNC:HGNC:27312	sterile alpha motif domain containing 14
hsa-miR-1180-3p	NM_001258040.2	159	-32.22	159	-32.22	13557	22	2202	272	HARS	GeneID:3035,Genbank:NM_001289094.1,HGNC:HGNC:4816,MIM:142810	histidyl-tRNA synthetase	GO:0004821,GO:0005524,GO:0005737,GO:0005739,GO:0005829,GO:0006412,GO:0006418,GO:0006427,GO:0032543,GO:0042802	histidine-tRNA ligase activity|ATP binding|cytoplasm|mitochondrion|cytosol|translation|tRNA aminoacylation for protein translation|histidyl-tRNA aminoacylation|mitochondrial translation|identical protein binding	path:hsa00970	Aminoacyl-tRNA biosynthesis
hsa-miR-1180-3p	NM_001258041.2	159	-32.22	159	-32.22	13558	22	2262	272	HARS	GeneID:3035,Genbank:NM_001289094.1,HGNC:HGNC:4816,MIM:142810	histidyl-tRNA synthetase	GO:0004821,GO:0005524,GO:0005737,GO:0005739,GO:0005829,GO:0006412,GO:0006418,GO:0006427,GO:0032543,GO:0042802	histidine-tRNA ligase activity|ATP binding|cytoplasm|mitochondrion|cytosol|translation|tRNA aminoacylation for protein translation|histidyl-tRNA aminoacylation|mitochondrial translation|identical protein binding	path:hsa00970	Aminoacyl-tRNA biosynthesis
hsa-miR-1180-3p	NM_001258042.2	159	-32.22	159	-32.22	13559	22	2142	272	HARS	GeneID:3035,Genbank:NM_001289094.1,HGNC:HGNC:4816,MIM:142810	histidyl-tRNA synthetase	GO:0004821,GO:0005524,GO:0005737,GO:0005739,GO:0005829,GO:0006412,GO:0006418,GO:0006427,GO:0032543,GO:0042802	histidine-tRNA ligase activity|ATP binding|cytoplasm|mitochondrion|cytosol|translation|tRNA aminoacylation for protein translation|histidyl-tRNA aminoacylation|mitochondrial translation|identical protein binding	path:hsa00970	Aminoacyl-tRNA biosynthesis
hsa-miR-1180-3p	NM_001270490.1	159	-30.83	159	-30.83	14183	22	806	683	RPL18	GeneID:6141,Genbank:NM_001270490.1,HGNC:HGNC:10310,MIM:604179	ribosomal protein L18	GO:0000184,GO:0003723,GO:0003735,GO:0005634,GO:0005730,GO:0005783,GO:0005829,GO:0005925,GO:0006364,GO:0006412,GO:0006413,GO:0006614,GO:0016020,GO:0019083,GO:0022625	nuclear-transcribed mRNA catabolic process, nonsense-mediated decay|RNA binding|structural constituent of ribosome|nucleus|nucleolus|endoplasmic reticulum|cytosol|focal adhesion|rRNA processing|translation|translational initiation|SRP-dependent cotranslational protein targeting to membrane|membrane|viral transcription|cytosolic large ribosomal subunit	path:hsa03010	Ribosome
hsa-miR-1180-3p	NM_001270707.1	168	-32.81	168	-32.81	14242	22	1588	8	NRM	GeneID:11270,Genbank:NM_007243.2,HGNC:HGNC:8003	nurim	GO:0005635,GO:0005637,GO:0016020,GO:0016021,GO:0031965	nuclear envelope|nuclear inner membrane|membrane|integral component of membrane|nuclear membrane
hsa-miR-1180-3p	NM_001270708.1	168	-32.81	168	-32.81	14243	22	1415	8	NRM	GeneID:11270,Genbank:NM_007243.2,HGNC:HGNC:8003	nurim	GO:0005635,GO:0005637,GO:0016020,GO:0016021,GO:0031965	nuclear envelope|nuclear inner membrane|membrane|integral component of membrane|nuclear membrane
hsa-miR-1180-3p	NM_001270709.1	168	-32.81	168	-32.81	14244	22	1393	8	NRM	GeneID:11270,Genbank:NM_007243.2,HGNC:HGNC:8003	nurim	GO:0005635,GO:0005637,GO:0016020,GO:0016021,GO:0031965	nuclear envelope|nuclear inner membrane|membrane|integral component of membrane|nuclear membrane
hsa-miR-1180-3p	NM_001270710.1	168	-32.81	168	-32.81	14245	22	1196	8	NRM	GeneID:11270,Genbank:NM_007243.2,HGNC:HGNC:8003	nurim	GO:0005635,GO:0005637,GO:0016020,GO:0016021,GO:0031965	nuclear envelope|nuclear inner membrane|membrane|integral component of membrane|nuclear membrane
hsa-miR-1180-3p	NM_001271926.1	165	-31.79	165	-31.79	14576	22	2147	874	BCKDK	GeneID:10295,Genbank:NM_001122957.2,HGNC:HGNC:16902,MIM:614901	branched chain ketoacid dehydrogenase kinase
hsa-miR-1180-3p	NM_001271938.1	166	-31.01	166	-31.01	14583	22	11167	9110	MEGF8	GeneID:1954,Genbank:NM_001271938.1,HGNC:HGNC:3233,MIM:604267	multiple EGF like domains 8	GO:0003143,GO:0005509,GO:0005634,GO:0010468,GO:0016021,GO:0030326,GO:0030509,GO:0035108,GO:0042074,GO:0048704,GO:0048842,GO:0055113,GO:0060971,GO:0060972,GO:0060976,GO:0061371,GO:0070062,GO:0071907,GO:0097094,GO:0097155	embryonic heart tube morphogenesis|calcium ion binding|nucleus|regulation of gene expression|integral component of membrane|embryonic limb morphogenesis|BMP signaling pathway|limb morphogenesis|cell migration involved in gastrulation|embryonic skeletal system morphogenesis|positive regulation of axon extension involved in axon guidance|epiboly involved in gastrulation with mouth forming second|em…
hsa-miR-1180-3p	NM_001278158.1	159	-31.3	159	-31.3	14921	22	2327	1543	ZNF205	GeneID:7755,Genbank:NM_003456.2,HGNC:HGNC:12996,MIM:603436	zinc finger protein 205	GO:0000122,GO:0000977,GO:0001227,GO:0005634,GO:0005739,GO:0006351,GO:0006355,GO:0008270,GO:0010729,GO:1901030	negative regulation of transcription from RNA polymerase II promoter|RNA polymerase II regulatory region sequence-specific DNA binding|transcriptional repressor activity, RNA polymerase II transcription regulatory region sequence-specific DNA binding|nucleus|mitochondrion|transcription, DNA-templated|regulation of transcription, DNA-templated|zinc ion binding|positive regulation of hydrogen perox…
hsa-miR-1180-3p	NM_001278250.2	180	-35.76	180	-35.76	15002	22	2463	1382	SLC25A45	GeneID:283130,Genbank:NM_001278251.2,HGNC:HGNC:27442,MIM:610825	solute carrier family 25 member 45	GO:0005743,GO:0006839,GO:0016021,GO:0022857	mitochondrial inner membrane|mitochondrial transport|integral component of membrane|transmembrane transporter activity
hsa-miR-1180-3p	NM_001278251.2	180	-35.76	180	-35.76	15003	22	3109	2028	SLC25A45	GeneID:283130,Genbank:NM_001278251.2,HGNC:HGNC:27442,MIM:610825	solute carrier family 25 member 45	GO:0005743,GO:0006839,GO:0016021,GO:0022857	mitochondrial inner membrane|mitochondrial transport|integral component of membrane|transmembrane transporter activity
hsa-miR-1180-3p	NM_001278346.1	161	-32.52	161	-32.52	15072	22	2921	61	PHYKPL	GeneID:85007,Genbank:NM_153373.3,HGNC:HGNC:28249,MIM:614683	5-phosphohydroxy-L-lysine phospho-lyase	GO:0005739,GO:0005759,GO:0006554,GO:0008453,GO:0016829,GO:0030170,GO:0030574,GO:0042802	mitochondrion|mitochondrial matrix|lysine catabolic process|alanine-glyoxylate transaminase activity|lyase activity|pyridoxal phosphate binding|collagen catabolic process|identical protein binding	path:hsa00310	Lysine degradation
hsa-miR-1180-3p	NM_001282434.1	163	-34.63	163	-34.63	15780	22	1430	67	HES6	GeneID:55502,Genbank:NM_001142853.2,HGNC:HGNC:18254,MIM:610331	hes family bHLH transcription factor 6	GO:0000977,GO:0001227,GO:0003700,GO:0003712,GO:0005634,GO:0005667,GO:0006351,GO:0006355,GO:0007399,GO:0008134,GO:0030154,GO:0046983	RNA polymerase II regulatory region sequence-specific DNA binding|transcriptional repressor activity, RNA polymerase II transcription regulatory region sequence-specific DNA binding|DNA binding transcription factor activity|transcription cofactor activity|nucleus|transcription factor complex|transcription, DNA-templated|regulation of transcription, DNA-templated|nervous system development|transcr…	path:hsa05165	Human papillomavirus infection
hsa-miR-1180-3p	NM_001282930.1	161	-30.46	161	-30.46	16193	22	4513	243	C19orf12	GeneID:83636,Genbank:NM_001256047.1,HGNC:HGNC:25443,MIM:614297	chromosome 19 open reading frame 12	GO:0005739,GO:0005783,GO:0005829,GO:0006914,GO:0006915,GO:0006979,GO:0016021,GO:0031966,GO:0051560	mitochondrion|endoplasmic reticulum|cytosol|autophagy|apoptotic process|response to oxidative stress|integral component of membrane|mitochondrial membrane|mitochondrial calcium ion homeostasis
hsa-miR-1180-3p	NM_001282931.1	161	-30.46	161	-30.46	16194	22	4804	243	C19orf12	GeneID:83636,Genbank:NM_001256047.1,HGNC:HGNC:25443,MIM:614297	chromosome 19 open reading frame 12	GO:0005739,GO:0005783,GO:0005829,GO:0006914,GO:0006915,GO:0006979,GO:0016021,GO:0031966,GO:0051560	mitochondrion|endoplasmic reticulum|cytosol|autophagy|apoptotic process|response to oxidative stress|integral component of membrane|mitochondrial membrane|mitochondrial calcium ion homeostasis
hsa-miR-1180-3p	NM_001282944.1	161	-32.53	161	-32.53	16205	22	2087	1402	PMPCA	GeneID:23203,Genbank:NM_015160.2,HGNC:HGNC:18667,MIM:613036	peptidase, mitochondrial processing alpha subunit	GO:0004222,GO:0005615,GO:0005739,GO:0005743,GO:0005759,GO:0006508,GO:0006627,GO:0006851,GO:0008270	metalloendopeptidase activity|extracellular space|mitochondrion|mitochondrial inner membrane|mitochondrial matrix|proteolysis|protein processing involved in protein targeting to mitochondrion|mitochondrial calcium ion transmembrane transport|zinc ion binding
hsa-miR-1180-3p	NM_001282946.1	161	-32.53	161	-32.53	16206	22	2180	1495	PMPCA	GeneID:23203,Genbank:NM_015160.2,HGNC:HGNC:18667,MIM:613036	peptidase, mitochondrial processing alpha subunit	GO:0004222,GO:0005615,GO:0005739,GO:0005743,GO:0005759,GO:0006508,GO:0006627,GO:0006851,GO:0008270	metalloendopeptidase activity|extracellular space|mitochondrion|mitochondrial inner membrane|mitochondrial matrix|proteolysis|protein processing involved in protein targeting to mitochondrion|mitochondrial calcium ion transmembrane transport|zinc ion binding
hsa-miR-1180-3p	NM_001282985.1	163	-33.48	163	-33.48	16237	22	2823	257	TRIB1	GeneID:10221,Genbank:NM_025195.3,HGNC:HGNC:16891,MIM:609461	tribbles pseudokinase 1	GO:0004860,GO:0005634,GO:0005737,GO:0006469,GO:0007254,GO:0008134,GO:0014912,GO:0031434,GO:0031625,GO:0031665,GO:0032436,GO:0032496,GO:0043405,GO:0043433,GO:0045645,GO:0045651,GO:0045659,GO:0048662,GO:0055106	protein kinase inhibitor activity|nucleus|cytoplasm|negative regulation of protein kinase activity|JNK cascade|transcription factor binding|negative regulation of smooth muscle cell migration|mitogen-activated protein kinase kinase binding|ubiquitin protein ligase binding|negative regulation of lipopolysaccharide-mediated signaling pathway|positive regulation of proteasomal ubiquitin-dependent pr…
hsa-miR-1180-3p	NM_001286487.1	154	-30.83	154	-30.83	16781	22	3049	103	TMEM87A	GeneID:25963,Genbank:NM_001286487.1,HGNC:HGNC:24522	transmembrane protein 87A	GO:0005829,GO:0016021,GO:0032580,GO:0042147	cytosol|integral component of membrane|Golgi cisterna membrane|retrograde transport, endosome to Golgi
hsa-miR-1180-3p	NM_001286732.1	159	-33.76	159	-33.76	16946	22	1849	1	GRTP1	GeneID:79774,Genbank:XM_017020755.2,HGNC:HGNC:20310	growth hormone regulated TBC protein 1	GO:0005096,GO:0005622,GO:0006886,GO:0012505,GO:0017137,GO:0031338,GO:0090630	GTPase activator activity|intracellular|intracellular protein transport|endomembrane system|Rab GTPase binding|regulation of vesicle fusion|activation of GTPase activity
hsa-miR-1180-3p	NM_001286733.1	159	-33.76	159	-33.76	16947	22	1073	1	GRTP1	GeneID:79774,Genbank:XM_017020755.2,HGNC:HGNC:20310	growth hormone regulated TBC protein 1	GO:0005096,GO:0005622,GO:0006886,GO:0012505,GO:0017137,GO:0031338,GO:0090630	GTPase activator activity|intracellular|intracellular protein transport|endomembrane system|Rab GTPase binding|regulation of vesicle fusion|activation of GTPase activity
hsa-miR-1180-3p	NM_001286752.1	176	-35.92	176	-35.92	16959	22	3568	242	SETD4	GeneID:54093,Genbank:XM_011529642.2,HGNC:HGNC:1258	SET domain containing 4	GO:0005730,GO:0016279,GO:0018023,GO:0018026,GO:0042254	nucleolus|protein-lysine N-methyltransferase activity|peptidyl-lysine trimethylation|peptidyl-lysine monomethylation|ribosome biogenesis
hsa-miR-1180-3p	NM_001289092.1	159	-32.22	159	-32.22	17624	22	2100	272	HARS	GeneID:3035,Genbank:NM_001289094.1,HGNC:HGNC:4816,MIM:142810	histidyl-tRNA synthetase	GO:0004821,GO:0005524,GO:0005737,GO:0005739,GO:0005829,GO:0006412,GO:0006418,GO:0006427,GO:0032543,GO:0042802	histidine-tRNA ligase activity|ATP binding|cytoplasm|mitochondrion|cytosol|translation|tRNA aminoacylation for protein translation|histidyl-tRNA aminoacylation|mitochondrial translation|identical protein binding	path:hsa00970	Aminoacyl-tRNA biosynthesis
hsa-miR-1180-3p	NM_001289093.1	159	-32.22	159	-32.22	17625	22	1964	272	HARS	GeneID:3035,Genbank:NM_001289094.1,HGNC:HGNC:4816,MIM:142810	histidyl-tRNA synthetase	GO:0004821,GO:0005524,GO:0005737,GO:0005739,GO:0005829,GO:0006412,GO:0006418,GO:0006427,GO:0032543,GO:0042802	histidine-tRNA ligase activity|ATP binding|cytoplasm|mitochondrion|cytosol|translation|tRNA aminoacylation for protein translation|histidyl-tRNA aminoacylation|mitochondrial translation|identical protein binding	path:hsa00970	Aminoacyl-tRNA biosynthesis
hsa-miR-1180-3p	NM_001289094.1	159	-32.22	159	-32.22	17626	22	2219	272	HARS	GeneID:3035,Genbank:NM_001289094.1,HGNC:HGNC:4816,MIM:142810	histidyl-tRNA synthetase	GO:0004821,GO:0005524,GO:0005737,GO:0005739,GO:0005829,GO:0006412,GO:0006418,GO:0006427,GO:0032543,GO:0042802	histidine-tRNA ligase activity|ATP binding|cytoplasm|mitochondrion|cytosol|translation|tRNA aminoacylation for protein translation|histidyl-tRNA aminoacylation|mitochondrial translation|identical protein binding	path:hsa00970	Aminoacyl-tRNA biosynthesis
hsa-miR-1180-3p	NM_001289410.1	162	-33.52	162	-33.52	17729	22	2742	371	FAM104A	GeneID:84923,Genbank:NM_001289410.1,HGNC:HGNC:25918	family with sequence similarity 104 member A
hsa-miR-1180-3p	NM_001289411.1	162	-33.52	162	-33.52	17730	22	2760	389	FAM104A	GeneID:84923,Genbank:NM_001289410.1,HGNC:HGNC:25918	family with sequence similarity 104 member A
hsa-miR-1180-3p	NM_001289412.1	162	-33.52	162	-33.52	17731	22	2678	307	FAM104A	GeneID:84923,Genbank:NM_001289410.1,HGNC:HGNC:25918	family with sequence similarity 104 member A
hsa-miR-1180-3p	NM_001289973.1	153	-30.21	153	-30.21	17791	22	5046	65	XKR5	GeneID:389610,Genbank:NM_207411.4,HGNC:HGNC:20782	XK related 5	GO:0016021	integral component of membrane
hsa-miR-1180-3p	NM_001291333.1	164	-31.23	164	-31.23	18029	22	2098	14	TTC4	GeneID:7268,Genbank:NM_004623.4,HGNC:HGNC:12394,MIM:606753	tetratricopeptide repeat domain 4
hsa-miR-1180-3p	NM_001293196.1	155	-30.89	155	-30.89	18332	22	1728	90	MUTYH	GeneID:4595,Genbank:NM_001350651.1,HGNC:HGNC:7527,MIM:604933	mutY DNA glycosylase			path:hsa03410	Base excision repair
hsa-miR-1180-3p	NM_001294335.1	163	-32.04	163	-32.04	18395	22	5455	1681	ADGRB2	GeneID:576,Genbank:XM_011541849.2,HGNC:HGNC:944,MIM:602683	adhesion G protein-coupled receptor B2	GO:0004930,GO:0005813,GO:0005886,GO:0007166,GO:0007186,GO:0007422,GO:0016021,GO:0016525,GO:0033173,GO:0051965	G-protein coupled receptor activity|centrosome|plasma membrane|cell surface receptor signaling pathway|G-protein coupled receptor signaling pathway|peripheral nervous system development|integral component of membrane|negative regulation of angiogenesis|calcineurin-NFAT signaling cascade|positive regulation of synapse assembly
hsa-miR-1180-3p	NM_001294336.1	163	-32.04	163	-32.04	18396	22	5356	1681	ADGRB2	GeneID:576,Genbank:XM_011541849.2,HGNC:HGNC:944,MIM:602683	adhesion G protein-coupled receptor B2	GO:0004930,GO:0005813,GO:0005886,GO:0007166,GO:0007186,GO:0007422,GO:0016021,GO:0016525,GO:0033173,GO:0051965	G-protein coupled receptor activity|centrosome|plasma membrane|cell surface receptor signaling pathway|G-protein coupled receptor signaling pathway|peripheral nervous system development|integral component of membrane|negative regulation of angiogenesis|calcineurin-NFAT signaling cascade|positive regulation of synapse assembly
hsa-miR-1180-3p	NM_001297605.1	172	-32.31	172	-32.31	18479	22	3376	609	TNFRSF14	GeneID:8764,Genbank:NM_003820.3,HGNC:HGNC:11912,MIM:602746	TNF receptor superfamily member 14			path:hsa04060,path:hsa05168	Cytokine-cytokine receptor interaction|Herpes simplex infection
hsa-miR-1180-3p	NM_001300820.1	180	-35.76	180	-35.76	18699	22	2349	1268	SLC25A45	GeneID:283130,Genbank:NM_001278251.2,HGNC:HGNC:27442,MIM:610825	solute carrier family 25 member 45	GO:0005743,GO:0006839,GO:0016021,GO:0022857	mitochondrial inner membrane|mitochondrial transport|integral component of membrane|transmembrane transporter activity
hsa-miR-1180-3p	NM_001300900.1	163	-35.42	163	-35.42	18762	22	1041	493	MRPS34	GeneID:65993,Genbank:XM_017023595.1,HGNC:HGNC:16618,MIM:611994	mitochondrial ribosomal protein S34	GO:0003735,GO:0005739,GO:0005743,GO:0005763,GO:0032543,GO:0070125,GO:0070126	structural constituent of ribosome|mitochondrion|mitochondrial inner membrane|mitochondrial small ribosomal subunit|mitochondrial translation|mitochondrial translational elongation|mitochondrial translational termination
hsa-miR-1180-3p	NM_001303486.2	162	-30.84	162	-30.84	19373	22	3882	4	PARG	GeneID:8505,Genbank:NM_001303486.2,HGNC:HGNC:8605,MIM:603501	poly(ADP-ribose) glycohydrolase	GO:0004649,GO:0005634,GO:0005654,GO:0005737,GO:0005759,GO:0005829,GO:0005975,GO:0043231,GO:1990966	poly(ADP-ribose) glycohydrolase activity|nucleus|nucleoplasm|cytoplasm|mitochondrial matrix|cytosol|carbohydrate metabolic process|intracellular membrane-bounded organelle|ATP generation from poly-ADP-D-ribose
hsa-miR-1180-3p	NM_001303487.2	162	-30.84	162	-30.84	19374	22	4245	4	PARG	GeneID:8505,Genbank:NM_001303486.2,HGNC:HGNC:8605,MIM:603501	poly(ADP-ribose) glycohydrolase	GO:0004649,GO:0005634,GO:0005654,GO:0005737,GO:0005759,GO:0005829,GO:0005975,GO:0043231,GO:1990966	poly(ADP-ribose) glycohydrolase activity|nucleus|nucleoplasm|cytoplasm|mitochondrial matrix|cytosol|carbohydrate metabolic process|intracellular membrane-bounded organelle|ATP generation from poly-ADP-D-ribose
hsa-miR-1180-3p	NM_001303489.2	162	-30.84	162	-30.84	19375	22	3074	4	PARG	GeneID:8505,Genbank:NM_001303486.2,HGNC:HGNC:8605,MIM:603501	poly(ADP-ribose) glycohydrolase	GO:0004649,GO:0005634,GO:0005654,GO:0005737,GO:0005759,GO:0005829,GO:0005975,GO:0043231,GO:1990966	poly(ADP-ribose) glycohydrolase activity|nucleus|nucleoplasm|cytoplasm|mitochondrial matrix|cytosol|carbohydrate metabolic process|intracellular membrane-bounded organelle|ATP generation from poly-ADP-D-ribose
hsa-miR-1180-3p	NM_001303503.1	158	-30.16	158	-30.16	19383	22	1435	3	PPP4C	GeneID:5531,Genbank:NM_001303503.1,HGNC:HGNC:9319,MIM:602035	protein phosphatase 4 catalytic subunit	GO:0004704,GO:0004722,GO:0005634,GO:0005654,GO:0005815,GO:0005829,GO:0005886,GO:0010569,GO:0030289,GO:0046872	NF-kappaB-inducing kinase activity|protein serine/threonine phosphatase activity|nucleus|nucleoplasm|microtubule organizing center|cytosol|plasma membrane|regulation of double-strand break repair via homologous recombination|protein phosphatase 4 complex|metal ion binding	path:hsa04922	Glucagon signaling pathway
hsa-miR-1180-3p	NM_001303504.1	158	-30.16	158	-30.16	19384	22	1327	3	PPP4C	GeneID:5531,Genbank:NM_001303503.1,HGNC:HGNC:9319,MIM:602035	protein phosphatase 4 catalytic subunit	GO:0004704,GO:0004722,GO:0005634,GO:0005654,GO:0005815,GO:0005829,GO:0005886,GO:0010569,GO:0030289,GO:0046872	NF-kappaB-inducing kinase activity|protein serine/threonine phosphatase activity|nucleus|nucleoplasm|microtubule organizing center|cytosol|plasma membrane|regulation of double-strand break repair via homologous recombination|protein phosphatase 4 complex|metal ion binding	path:hsa04922	Glucagon signaling pathway
hsa-miR-1180-3p	NM_001303506.1	158	-30.16	158	-30.16	19385	22	1488	3	PPP4C	GeneID:5531,Genbank:NM_001303503.1,HGNC:HGNC:9319,MIM:602035	protein phosphatase 4 catalytic subunit	GO:0004704,GO:0004722,GO:0005634,GO:0005654,GO:0005815,GO:0005829,GO:0005886,GO:0010569,GO:0030289,GO:0046872	NF-kappaB-inducing kinase activity|protein serine/threonine phosphatase activity|nucleus|nucleoplasm|microtubule organizing center|cytosol|plasma membrane|regulation of double-strand break repair via homologous recombination|protein phosphatase 4 complex|metal ion binding	path:hsa04922	Glucagon signaling pathway
hsa-miR-1180-3p	NM_001303507.1	158	-30.16	158	-30.16	19386	22	1377	3	PPP4C	GeneID:5531,Genbank:NM_001303503.1,HGNC:HGNC:9319,MIM:602035	protein phosphatase 4 catalytic subunit	GO:0004704,GO:0004722,GO:0005634,GO:0005654,GO:0005815,GO:0005829,GO:0005886,GO:0010569,GO:0030289,GO:0046872	NF-kappaB-inducing kinase activity|protein serine/threonine phosphatase activity|nucleus|nucleoplasm|microtubule organizing center|cytosol|plasma membrane|regulation of double-strand break repair via homologous recombination|protein phosphatase 4 complex|metal ion binding	path:hsa04922	Glucagon signaling pathway
hsa-miR-1180-3p	NM_001303625.1	159	-30.99	159	-30.99	19421	22	2504	47	RPL10	GeneID:6134,Genbank:NM_001303625.1,HGNC:HGNC:10298,MIM:312173	ribosomal protein L10	GO:0000027,GO:0000122,GO:0003723,GO:0003735,GO:0005634,GO:0005737,GO:0005790,GO:0006412,GO:0006417,GO:0016020,GO:0022625,GO:0043066,GO:0043234,GO:0045182,GO:0097421,GO:1990403	ribosomal large subunit assembly|negative regulation of transcription from RNA polymerase II promoter|RNA binding|structural constituent of ribosome|nucleus|cytoplasm|smooth endoplasmic reticulum|translation|regulation of translation|membrane|cytosolic large ribosomal subunit|negative regulation of apoptotic process|protein complex|translation regulator activity|liver regeneration|embryonic brain…	path:hsa03010	Ribosome
hsa-miR-1180-3p	NM_001304360.1	163	-31.38	163	-31.38	19460	22	5412	2264	CFAP74	GeneID:85452,Genbank:NM_001304360.1,HGNC:HGNC:29368	cilia and flagella associated protein 74	GO:0005930,GO:0035082	axoneme|axoneme assembly
hsa-miR-1180-3p	NM_001304363.1	158	-30.1	158	-30.1	19462	22	2008	1028	ZBTB26	GeneID:57684,Genbank:NM_020924.3,HGNC:HGNC:23383	zinc finger and BTB domain containing 26	GO:0003677,GO:0005634,GO:0006351,GO:0006355,GO:0042802,GO:0046872	DNA binding|nucleus|transcription, DNA-templated|regulation of transcription, DNA-templated|identical protein binding|metal ion binding
hsa-miR-1180-3p	NM_001304364.1	158	-30.1	158	-30.1	19463	22	2137	1157	ZBTB26	GeneID:57684,Genbank:NM_020924.3,HGNC:HGNC:23383	zinc finger and BTB domain containing 26	GO:0003677,GO:0005634,GO:0006351,GO:0006355,GO:0042802,GO:0046872	DNA binding|nucleus|transcription, DNA-templated|regulation of transcription, DNA-templated|identical protein binding|metal ion binding
hsa-miR-1180-3p	NM_001306158.1	162	-30.46	162	-30.46	19826	22	2201	22	RABL2A	GeneID:11159,Genbank:XM_017003211.1,HGNC:HGNC:9799,MIM:605412	RAB, member of RAS oncogene family like 2A	GO:0003924,GO:0005525	GTPase activity|GTP binding
hsa-miR-1180-3p	NM_001306159.1	162	-30.46	162	-30.46	19827	22	1157	22	RABL2A	GeneID:11159,Genbank:XM_017003211.1,HGNC:HGNC:9799,MIM:605412	RAB, member of RAS oncogene family like 2A	GO:0003924,GO:0005525	GTPase activity|GTP binding
hsa-miR-1180-3p	NM_001306160.2	162	-30.46	162	-30.46	19828	22	2211	22	RABL2A	GeneID:11159,Genbank:XM_017003211.1,HGNC:HGNC:9799,MIM:605412	RAB, member of RAS oncogene family like 2A	GO:0003924,GO:0005525	GTPase activity|GTP binding
hsa-miR-1180-3p	NM_001306161.1	162	-30.46	162	-30.46	19829	22	2013	22	RABL2A	GeneID:11159,Genbank:XM_017003211.1,HGNC:HGNC:9799,MIM:605412	RAB, member of RAS oncogene family like 2A	GO:0003924,GO:0005525	GTPase activity|GTP binding
hsa-miR-1180-3p	NM_001307977.1	171	-30.42	171	-30.42	19882	22	1254	39	WDR74	GeneID:54663,Genbank:XM_024448586.1,HGNC:HGNC:25529	WD repeat domain 74	GO:0005634,GO:0005730,GO:0030687,GO:0042273	nucleus|nucleolus|preribosome, large subunit precursor|ribosomal large subunit biogenesis
hsa-miR-1180-3p	NM_001308226.1	161	-32.78	161	-32.78	20051	22	641	353	RPS15	GeneID:6209,Genbank:NM_001018.4,HGNC:HGNC:10388,MIM:180535	ribosomal protein S15	GO:0000028,GO:0003723,GO:0003735,GO:0006412,GO:0022627,GO:0098556	ribosomal small subunit assembly|RNA binding|structural constituent of ribosome|translation|cytosolic small ribosomal subunit|cytoplasmic side of rough endoplasmic reticulum membrane	path:hsa03010	Ribosome
hsa-miR-1180-3p	NM_001308277.1	165	-32.09	165	-32.09	20083	22	2042	871	C19orf66	GeneID:55337,Genbank:NM_018381.3,HGNC:HGNC:25649,MIM:616808	chromosome 19 open reading frame 66	GO:0003723,GO:0005634,GO:0005654,GO:0005737,GO:0005829,GO:0034340,GO:0034341,GO:0034342,GO:0045071,GO:0051607	RNA binding|nucleus|nucleoplasm|cytoplasm|cytosol|response to type I interferon|response to interferon-gamma|response to type III interferon|negative regulation of viral genome replication|defense response to virus
hsa-miR-1180-3p	NM_001310338.1	165	-31.22	165	-31.22	20224	22	2417	404	MGME1	GeneID:92667,Genbank:XM_017028128.1,HGNC:HGNC:16205,MIM:615076	mitochondrial genome maintenance exonuclease 1	GO:0000002,GO:0003677,GO:0005739,GO:0006264,GO:0008297,GO:0043504	mitochondrial genome maintenance|DNA binding|mitochondrion|mitochondrial DNA replication|single-stranded DNA exodeoxyribonuclease activity|mitochondrial DNA repair
hsa-miR-1180-3p	NM_001310339.1	165	-31.22	165	-31.22	20225	22	2019	404	MGME1	GeneID:92667,Genbank:XM_017028128.1,HGNC:HGNC:16205,MIM:615076	mitochondrial genome maintenance exonuclease 1	GO:0000002,GO:0003677,GO:0005739,GO:0006264,GO:0008297,GO:0043504	mitochondrial genome maintenance|DNA binding|mitochondrion|mitochondrial DNA replication|single-stranded DNA exodeoxyribonuclease activity|mitochondrial DNA repair
hsa-miR-1180-3p	NM_001318507.1	175	-34.51	175	-34.51	21049	22	2006	1873	CTU2	GeneID:348180,Genbank:NM_001318507.1,HGNC:HGNC:28005,MIM:617057	cytosolic thiouridylase subunit 2	GO:0000049,GO:0002098,GO:0002143,GO:0005829,GO:0006400,GO:0016783,GO:0034227,GO:0043234	tRNA binding|tRNA wobble uridine modification|tRNA wobble position uridine thiolation|cytosol|tRNA modification|sulfurtransferase activity|tRNA thio-modification|protein complex	path:hsa04122	Sulfur relay system
hsa-miR-1180-3p	NM_001318511.1	167	-37.26	167	-37.26	21053	22	3598	368	CTDP1	GeneID:9150,Genbank:NM_004715.4,HGNC:HGNC:2498,MIM:604927	CTD phosphatase subunit 1	GO:0000922,GO:0001096,GO:0004721,GO:0005634,GO:0005654,GO:0005737,GO:0005813,GO:0005819,GO:0006366,GO:0006368,GO:0006470,GO:0008420,GO:0010458,GO:0016591,GO:0030496,GO:0030957,GO:0043231,GO:0043234,GO:0043923,GO:0050434,GO:0051233,GO:0051301,GO:0061052,GO:0070940	spindle pole|TFIIF-class transcription factor binding|phosphoprotein phosphatase activity|nucleus|nucleoplasm|cytoplasm|centrosome|spindle|transcription from RNA polymerase II promoter|transcription elongation from RNA polymerase II promoter|protein dephosphorylation|CTD phosphatase activity|exit from mitosis|DNA-directed RNA polymerase II, holoenzyme|midbody|Tat protein binding|intracellular mem…
hsa-miR-1180-3p	NM_001318513.1	175	-34.51	175	-34.51	21055	22	1714	1581	CTU2	GeneID:348180,Genbank:NM_001318507.1,HGNC:HGNC:28005,MIM:617057	cytosolic thiouridylase subunit 2	GO:0000049,GO:0002098,GO:0002143,GO:0005829,GO:0006400,GO:0016783,GO:0034227,GO:0043234	tRNA binding|tRNA wobble uridine modification|tRNA wobble position uridine thiolation|cytosol|tRNA modification|sulfurtransferase activity|tRNA thio-modification|protein complex	path:hsa04122	Sulfur relay system
hsa-miR-1180-3p	NM_001318758.1	167	-30.82	167	-30.82	21129	22	4712	65	NFX1	GeneID:4799,Genbank:NM_001318758.1,HGNC:HGNC:7803,MIM:603255	nuclear transcription factor, X-box binding 1	GO:0000122,GO:0000977,GO:0001078,GO:0003700,GO:0003723,GO:0005634,GO:0005730,GO:0005829,GO:0005886,GO:0006366,GO:0006954,GO:0008270,GO:0016032,GO:0016874,GO:0045347	negative regulation of transcription from RNA polymerase II promoter|RNA polymerase II regulatory region sequence-specific DNA binding|transcriptional repressor activity, RNA polymerase II proximal promoter sequence-specific DNA binding|DNA binding transcription factor activity|RNA binding|nucleus|nucleolus|cytosol|plasma membrane|transcription from RNA polymerase II promoter|inflammatory respons…	path:hsa05165	Human papillomavirus infection
hsa-miR-1180-3p	NM_001320845.1	171	-30.34	171	-30.34	21979	22	1021	534	SAT2	GeneID:112483,Genbank:XM_017024074.1,HGNC:HGNC:23160,MIM:611463	spermidine/spermine N1-acetyltransferase family member 2	GO:0004145,GO:0005737,GO:0009447,GO:0032918,GO:0032919,GO:0032920,GO:0042802,GO:0046204,GO:0070062	diamine N-acetyltransferase activity|cytoplasm|putrescine catabolic process|spermidine acetylation|spermine acetylation|putrescine acetylation|identical protein binding|nor-spermidine metabolic process|extracellular exosome	path:hsa00330,path:hsa04216	Arginine and proline metabolism|Ferroptosis
hsa-miR-1180-3p	NM_001322182.1	166	-30.42	166	-30.42	22950	22	3803	10	DCT	GeneID:1638,Genbank:NM_001322182.1,HGNC:HGNC:2709,MIM:191275	dopachrome tautomerase	GO:0002052,GO:0004167,GO:0005507,GO:0005829,GO:0006583,GO:0008544,GO:0016021,GO:0016491,GO:0021847,GO:0033162,GO:0042438,GO:0042470,GO:0048066,GO:0048468	positive regulation of neuroblast proliferation|dopachrome isomerase activity|copper ion binding|cytosol|melanin biosynthetic process from tyrosine|epidermis development|integral component of membrane|oxidoreductase activity|ventricular zone neuroblast division|melanosome membrane|melanin biosynthetic process|melanosome|developmental pigmentation|cell development	path:hsa00350,path:hsa04916	Tyrosine metabolism|Melanogenesis
hsa-miR-1180-3p	NM_001322183.1	166	-30.42	166	-30.42	22951	22	3857	10	DCT	GeneID:1638,Genbank:NM_001322182.1,HGNC:HGNC:2709,MIM:191275	dopachrome tautomerase	GO:0002052,GO:0004167,GO:0005507,GO:0005829,GO:0006583,GO:0008544,GO:0016021,GO:0016491,GO:0021847,GO:0033162,GO:0042438,GO:0042470,GO:0048066,GO:0048468	positive regulation of neuroblast proliferation|dopachrome isomerase activity|copper ion binding|cytosol|melanin biosynthetic process from tyrosine|epidermis development|integral component of membrane|oxidoreductase activity|ventricular zone neuroblast division|melanosome membrane|melanin biosynthetic process|melanosome|developmental pigmentation|cell development	path:hsa00350,path:hsa04916	Tyrosine metabolism|Melanogenesis
hsa-miR-1180-3p	NM_001322184.1	166	-30.42	166	-30.42	22952	22	4157	10	DCT	GeneID:1638,Genbank:NM_001322182.1,HGNC:HGNC:2709,MIM:191275	dopachrome tautomerase	GO:0002052,GO:0004167,GO:0005507,GO:0005829,GO:0006583,GO:0008544,GO:0016021,GO:0016491,GO:0021847,GO:0033162,GO:0042438,GO:0042470,GO:0048066,GO:0048468	positive regulation of neuroblast proliferation|dopachrome isomerase activity|copper ion binding|cytosol|melanin biosynthetic process from tyrosine|epidermis development|integral component of membrane|oxidoreductase activity|ventricular zone neuroblast division|melanosome membrane|melanin biosynthetic process|melanosome|developmental pigmentation|cell development	path:hsa00350,path:hsa04916	Tyrosine metabolism|Melanogenesis
hsa-miR-1180-3p	NM_001322185.1	166	-30.42	166	-30.42	22953	22	4103	10	DCT	GeneID:1638,Genbank:NM_001322182.1,HGNC:HGNC:2709,MIM:191275	dopachrome tautomerase	GO:0002052,GO:0004167,GO:0005507,GO:0005829,GO:0006583,GO:0008544,GO:0016021,GO:0016491,GO:0021847,GO:0033162,GO:0042438,GO:0042470,GO:0048066,GO:0048468	positive regulation of neuroblast proliferation|dopachrome isomerase activity|copper ion binding|cytosol|melanin biosynthetic process from tyrosine|epidermis development|integral component of membrane|oxidoreductase activity|ventricular zone neuroblast division|melanosome membrane|melanin biosynthetic process|melanosome|developmental pigmentation|cell development	path:hsa00350,path:hsa04916	Tyrosine metabolism|Melanogenesis
hsa-miR-1180-3p	NM_001322186.1	166	-30.42	166	-30.42	22954	22	4372	10	DCT	GeneID:1638,Genbank:NM_001322182.1,HGNC:HGNC:2709,MIM:191275	dopachrome tautomerase	GO:0002052,GO:0004167,GO:0005507,GO:0005829,GO:0006583,GO:0008544,GO:0016021,GO:0016491,GO:0021847,GO:0033162,GO:0042438,GO:0042470,GO:0048066,GO:0048468	positive regulation of neuroblast proliferation|dopachrome isomerase activity|copper ion binding|cytosol|melanin biosynthetic process from tyrosine|epidermis development|integral component of membrane|oxidoreductase activity|ventricular zone neuroblast division|melanosome membrane|melanin biosynthetic process|melanosome|developmental pigmentation|cell development	path:hsa00350,path:hsa04916	Tyrosine metabolism|Melanogenesis
hsa-miR-1180-3p	NM_001323543.1	155	-30.18	155	-30.18	23567	22	2260	11	GALNS	GeneID:2588,Genbank:NM_001323543.1,HGNC:HGNC:4122,MIM:612222	galactosamine (N-acetyl)-6-sulfatase	GO:0003943,GO:0005576,GO:0008484,GO:0035578,GO:0042340,GO:0043202,GO:0043312,GO:0043890,GO:0046872,GO:0070062	N-acetylgalactosamine-4-sulfatase activity|extracellular region|sulfuric ester hydrolase activity|azurophil granule lumen|keratan sulfate catabolic process|lysosomal lumen|neutrophil degranulation|N-acetylgalactosamine-6-sulfatase activity|metal ion binding|extracellular exosome	path:hsa00531,path:hsa04142	Glycosaminoglycan degradation|Lysosome
hsa-miR-1180-3p	NM_001323544.1	155	-30.18	155	-30.18	23568	22	2554	11	GALNS	GeneID:2588,Genbank:NM_001323543.1,HGNC:HGNC:4122,MIM:612222	galactosamine (N-acetyl)-6-sulfatase	GO:0003943,GO:0005576,GO:0008484,GO:0035578,GO:0042340,GO:0043202,GO:0043312,GO:0043890,GO:0046872,GO:0070062	N-acetylgalactosamine-4-sulfatase activity|extracellular region|sulfuric ester hydrolase activity|azurophil granule lumen|keratan sulfate catabolic process|lysosomal lumen|neutrophil degranulation|N-acetylgalactosamine-6-sulfatase activity|metal ion binding|extracellular exosome	path:hsa00531,path:hsa04142	Glycosaminoglycan degradation|Lysosome
hsa-miR-1180-3p	NM_001324228.1	158	-30.65	158	-30.65	23960	22	1919	15	STOML1	GeneID:9399,Genbank:NM_001256676.1,HGNC:HGNC:14560,MIM:608326	stomatin like 1	GO:0005886,GO:0006869,GO:0016021,GO:0031902,GO:0045121	plasma membrane|lipid transport|integral component of membrane|late endosome membrane|membrane raft
hsa-miR-1180-3p	NM_001324229.1	158	-30.65	158	-30.65	23961	22	2346	15	STOML1	GeneID:9399,Genbank:NM_001256676.1,HGNC:HGNC:14560,MIM:608326	stomatin like 1	GO:0005886,GO:0006869,GO:0016021,GO:0031902,GO:0045121	plasma membrane|lipid transport|integral component of membrane|late endosome membrane|membrane raft
hsa-miR-1180-3p	NM_001324230.1	158	-30.65	158	-30.65	23962	22	2172	15	STOML1	GeneID:9399,Genbank:NM_001256676.1,HGNC:HGNC:14560,MIM:608326	stomatin like 1	GO:0005886,GO:0006869,GO:0016021,GO:0031902,GO:0045121	plasma membrane|lipid transport|integral component of membrane|late endosome membrane|membrane raft
hsa-miR-1180-3p	NM_001324381.2	162	-30.84	162	-30.84	24092	22	3886	4	PARG	GeneID:8505,Genbank:NM_001303486.2,HGNC:HGNC:8605,MIM:603501	poly(ADP-ribose) glycohydrolase	GO:0004649,GO:0005634,GO:0005654,GO:0005737,GO:0005759,GO:0005829,GO:0005975,GO:0043231,GO:1990966	poly(ADP-ribose) glycohydrolase activity|nucleus|nucleoplasm|cytoplasm|mitochondrial matrix|cytosol|carbohydrate metabolic process|intracellular membrane-bounded organelle|ATP generation from poly-ADP-D-ribose
hsa-miR-1180-3p	NM_001330216.1	163	-30.98	163	-30.98	24748	22	5328	1445	CNP	GeneID:1267,Genbank:NM_033133.4,HGNC:HGNC:2158,MIM:123830	2',3'-cyclic nucleotide 3' phosphodiesterase	GO:0000226,GO:0003723,GO:0004113,GO:0005615,GO:0005634,GO:0005654,GO:0005737,GO:0005741,GO:0005743,GO:0005829,GO:0005874,GO:0005886,GO:0005902,GO:0007268,GO:0007409,GO:0007568,GO:0008344,GO:0009214,GO:0009636,GO:0016020,GO:0021762,GO:0030551,GO:0030900,GO:0031143,GO:0032496,GO:0035748,GO:0035749,GO:0042470,GO:0046902,GO:0048471,GO:0048709,GO:0070062	microtubule cytoskeleton organization|RNA binding|2',3'-cyclic-nucleotide 3'-phosphodiesterase activity|extracellular space|nucleus|nucleoplasm|cytoplasm|mitochondrial outer membrane|mitochondrial inner membrane|cytosol|microtubule|plasma membrane|microvillus|chemical synaptic transmission|axonogenesis|aging|adult locomotory behavior|cyclic nucleotide catabolic process|response to toxic substance…
hsa-miR-1180-3p	NM_001331018.1	167	-32.04	167	-32.04	25270	22	3476	768	VPS26C	GeneID:10311,Genbank:NM_001331018.1,HGNC:HGNC:3044,MIM:605298	VPS26 endosomal protein sorting factor C	GO:0005634,GO:0005768,GO:0006886,GO:0008565	nucleus|endosome|intracellular protein transport|protein transporter activity
hsa-miR-1180-3p	NM_001331021.1	167	-32.04	167	-32.04	25273	22	3707	768	VPS26C	GeneID:10311,Genbank:NM_001331018.1,HGNC:HGNC:3044,MIM:605298	VPS26 endosomal protein sorting factor C	GO:0005634,GO:0005768,GO:0006886,GO:0008565	nucleus|endosome|intracellular protein transport|protein transporter activity
hsa-miR-1180-3p	NM_001331022.1	167	-32.04	167	-32.04	25274	22	3770	768	VPS26C	GeneID:10311,Genbank:NM_001331018.1,HGNC:HGNC:3044,MIM:605298	VPS26 endosomal protein sorting factor C	GO:0005634,GO:0005768,GO:0006886,GO:0008565	nucleus|endosome|intracellular protein transport|protein transporter activity
hsa-miR-1180-3p	NM_001346506.1	169	-33.52	169	-33.52	25737	22	7782	537	SASH1	GeneID:23328,Genbank:XM_017010599.1,HGNC:HGNC:19182,MIM:607955	SAM and SH3 domain containing 1	GO:0000209,GO:0008022,GO:0010595,GO:0019901,GO:0031435,GO:0031666,GO:0032947,GO:0043234,GO:0043507,GO:0045766,GO:1900044,GO:1900745,GO:1901224,GO:1902498	protein polyubiquitination|protein C-terminus binding|positive regulation of endothelial cell migration|protein kinase binding|mitogen-activated protein kinase kinase kinase binding|positive regulation of lipopolysaccharide-mediated signaling pathway|protein complex scaffold activity|protein complex|positive regulation of JUN kinase activity|positive regulation of angiogenesis|regulation of prote…
hsa-miR-1180-3p	NM_001346810.1	162	-34.84	162	-34.84	25821	22	10333	172	DLGAP2	GeneID:9228,Genbank:NM_001346810.1,HGNC:HGNC:2906,MIM:605438	DLG associated protein 2	GO:0005883,GO:0005886,GO:0006461,GO:0007270,GO:0014069,GO:0019904,GO:0030054,GO:0045202,GO:0045211	neurofilament|plasma membrane|protein complex assembly|neuron-neuron synaptic transmission|postsynaptic density|protein domain specific binding|cell junction|synapse|postsynaptic membrane
hsa-miR-1180-3p	NM_001348716.1	168	-33.87	168	-33.87	26455	22	6625	221	KDM6B	GeneID:23135,Genbank:XM_005256549.3,HGNC:HGNC:29012,MIM:611577	lysine demethylase 6B	GO:0002437,GO:0003682,GO:0005634,GO:0005654,GO:0006338,GO:0008013,GO:0014823,GO:0021766,GO:0032452,GO:0043565,GO:0045165,GO:0045446,GO:0045944,GO:0046872,GO:0048333,GO:0051213,GO:0055007,GO:0060992,GO:0070301,GO:0071557,GO:0071558	inflammatory response to antigenic stimulus|chromatin binding|nucleus|nucleoplasm|chromatin remodeling|beta-catenin binding|response to activity|hippocampus development|histone demethylase activity|sequence-specific DNA binding|cell fate commitment|endothelial cell differentiation|positive regulation of transcription from RNA polymerase II promoter|metal ion binding|mesodermal cell differentiatio…
hsa-miR-1180-3p	NM_001349608.1	161	-32.23	161	-32.23	26976	22	8374	1538	CAMTA1	GeneID:23261,Genbank:NM_015215.3,HGNC:HGNC:18806,MIM:611501	calmodulin binding transcription activator 1
hsa-miR-1180-3p	NM_001349609.1	161	-32.23	161	-32.23	26977	22	8095	1608	CAMTA1	GeneID:23261,Genbank:NM_015215.3,HGNC:HGNC:18806,MIM:611501	calmodulin binding transcription activator 1
hsa-miR-1180-3p	NM_001349610.1	161	-32.23	161	-32.23	26978	22	8120	1608	CAMTA1	GeneID:23261,Genbank:NM_015215.3,HGNC:HGNC:18806,MIM:611501	calmodulin binding transcription activator 1
hsa-miR-1180-3p	NM_001349612.1	161	-32.23	161	-32.23	26979	22	8056	1538	CAMTA1	GeneID:23261,Genbank:NM_015215.3,HGNC:HGNC:18806,MIM:611501	calmodulin binding transcription activator 1
hsa-miR-1180-3p	NM_001350095.1	163	-34.71	163	-34.71	27270	22	5535	161	CNTN4	GeneID:152330,Genbank:NM_001350095.1,HGNC:HGNC:2174,MIM:607280	contactin 4	GO:0005576,GO:0005886,GO:0006501,GO:0007158,GO:0007399,GO:0007409,GO:0007411,GO:0007413,GO:0007420,GO:0030424,GO:0031175,GO:0031225,GO:0045665,GO:0048167	extracellular region|plasma membrane|C-terminal protein lipidation|neuron cell-cell adhesion|nervous system development|axonogenesis|axon guidance|axonal fasciculation|brain development|axon|neuron projection development|anchored component of membrane|negative regulation of neuron differentiation|regulation of synaptic plasticity
hsa-miR-1180-3p	NM_001351273.1	158	-30.33	158	-30.33	28218	22	9958	4633	APC2	GeneID:10297,Genbank:XM_005259475.2,HGNC:HGNC:24036,MIM:612034	APC2, WNT signaling pathway regulator	GO:0000226,GO:0005737,GO:0005794,GO:0005829,GO:0005874,GO:0005884,GO:0008013,GO:0008017,GO:0015630,GO:0016055,GO:0016342,GO:0030496,GO:0031258,GO:0035414,GO:0045171,GO:0048471,GO:0090090,GO:0090630	microtubule cytoskeleton organization|cytoplasm|Golgi apparatus|cytosol|microtubule|actin filament|beta-catenin binding|microtubule binding|microtubule cytoskeleton|Wnt signaling pathway|catenin complex|midbody|lamellipodium membrane|negative regulation of catenin import into nucleus|intercellular bridge|perinuclear region of cytoplasm|negative regulation of canonical Wnt signaling pathway|activa…	path:hsa04310,path:hsa04390,path:hsa04550,path:hsa04810,path:hsa04934,path:hsa05165,path:hsa05166,path:hsa05200,path:hsa05206,path:hsa05210,path:hsa05213,path:hsa05217,path:hsa05224,path:hsa05225,path:hsa05226	Wnt signaling pathway|Hippo signaling pathway|Signaling pathways regulating pluripotency of stem cells|Regulation of actin cytoskeleton|Cushing syndrome|Human papillomavirus infection|Human T-cell leukemia virus 1 infection|Pathways in cancer|MicroRNAs in cancer|Colorectal cancer|Endometrial cancer|Basal cell carcinoma|Breast cancer|Hepatocellular carcinoma|Gastric cancer
hsa-miR-1180-3p	NM_001352381.1	180	-35.76	180	-35.76	28986	22	2517	1454	SLC25A45	GeneID:283130,Genbank:NM_001278251.2,HGNC:HGNC:27442,MIM:610825	solute carrier family 25 member 45	GO:0005743,GO:0006839,GO:0016021,GO:0022857	mitochondrial inner membrane|mitochondrial transport|integral component of membrane|transmembrane transporter activity
hsa-miR-1180-3p	NM_001352382.1	180	-35.76	180	-35.76	28987	22	2348	1285	SLC25A45	GeneID:283130,Genbank:NM_001278251.2,HGNC:HGNC:27442,MIM:610825	solute carrier family 25 member 45	GO:0005743,GO:0006839,GO:0016021,GO:0022857	mitochondrial inner membrane|mitochondrial transport|integral component of membrane|transmembrane transporter activity
hsa-miR-1180-3p	NM_001352383.1	180	-35.76	180	-35.76	28988	22	2048	985	SLC25A45	GeneID:283130,Genbank:NM_001278251.2,HGNC:HGNC:27442,MIM:610825	solute carrier family 25 member 45	GO:0005743,GO:0006839,GO:0016021,GO:0022857	mitochondrial inner membrane|mitochondrial transport|integral component of membrane|transmembrane transporter activity
hsa-miR-1180-3p	NM_001352384.1	180	-35.76	180	-35.76	28989	22	2390	1327	SLC25A45	GeneID:283130,Genbank:NM_001278251.2,HGNC:HGNC:27442,MIM:610825	solute carrier family 25 member 45	GO:0005743,GO:0006839,GO:0016021,GO:0022857	mitochondrial inner membrane|mitochondrial transport|integral component of membrane|transmembrane transporter activity
hsa-miR-1180-3p	NM_001354405.1	162	-30.46	162	-30.46	30543	22	2456	22	RABL2A	GeneID:11159,Genbank:XM_017003211.1,HGNC:HGNC:9799,MIM:605412	RAB, member of RAS oncogene family like 2A	GO:0003924,GO:0005525	GTPase activity|GTP binding
hsa-miR-1180-3p	NM_001354406.1	162	-30.46	162	-30.46	30544	22	2218	22	RABL2A	GeneID:11159,Genbank:XM_017003211.1,HGNC:HGNC:9799,MIM:605412	RAB, member of RAS oncogene family like 2A	GO:0003924,GO:0005525	GTPase activity|GTP binding
hsa-miR-1180-3p	NM_001354407.1	162	-30.46	162	-30.46	30545	22	2214	22	RABL2A	GeneID:11159,Genbank:XM_017003211.1,HGNC:HGNC:9799,MIM:605412	RAB, member of RAS oncogene family like 2A	GO:0003924,GO:0005525	GTPase activity|GTP binding
hsa-miR-1180-3p	NM_001354408.1	162	-30.46	162	-30.46	30546	22	2373	22	RABL2A	GeneID:11159,Genbank:XM_017003211.1,HGNC:HGNC:9799,MIM:605412	RAB, member of RAS oncogene family like 2A	GO:0003924,GO:0005525	GTPase activity|GTP binding
hsa-miR-1180-3p	NM_001354409.1	162	-30.46	162	-30.46	30547	22	2466	22	RABL2A	GeneID:11159,Genbank:XM_017003211.1,HGNC:HGNC:9799,MIM:605412	RAB, member of RAS oncogene family like 2A	GO:0003924,GO:0005525	GTPase activity|GTP binding
hsa-miR-1180-3p	NM_001354410.1	162	-30.46	162	-30.46	30548	22	2215	22	RABL2A	GeneID:11159,Genbank:XM_017003211.1,HGNC:HGNC:9799,MIM:605412	RAB, member of RAS oncogene family like 2A	GO:0003924,GO:0005525	GTPase activity|GTP binding
hsa-miR-1180-3p	NM_001354412.1	162	-30.46	162	-30.46	30550	22	2188	22	RABL2A	GeneID:11159,Genbank:XM_017003211.1,HGNC:HGNC:9799,MIM:605412	RAB, member of RAS oncogene family like 2A	GO:0003924,GO:0005525	GTPase activity|GTP binding
hsa-miR-1180-3p	NM_001354413.1	162	-30.46	162	-30.46	30551	22	2343	22	RABL2A	GeneID:11159,Genbank:XM_017003211.1,HGNC:HGNC:9799,MIM:605412	RAB, member of RAS oncogene family like 2A	GO:0003924,GO:0005525	GTPase activity|GTP binding
hsa-miR-1180-3p	NM_001354414.1	162	-30.46	162	-30.46	30552	22	2436	22	RABL2A	GeneID:11159,Genbank:XM_017003211.1,HGNC:HGNC:9799,MIM:605412	RAB, member of RAS oncogene family like 2A	GO:0003924,GO:0005525	GTPase activity|GTP binding
hsa-miR-1180-3p	NM_001354416.1	162	-30.46	162	-30.46	30553	22	2185	22	RABL2A	GeneID:11159,Genbank:XM_017003211.1,HGNC:HGNC:9799,MIM:605412	RAB, member of RAS oncogene family like 2A	GO:0003924,GO:0005525	GTPase activity|GTP binding
hsa-miR-1180-3p	NM_001354417.1	162	-30.46	162	-30.46	30554	22	1103	22	RABL2A	GeneID:11159,Genbank:XM_017003211.1,HGNC:HGNC:9799,MIM:605412	RAB, member of RAS oncogene family like 2A	GO:0003924,GO:0005525	GTPase activity|GTP binding
hsa-miR-1180-3p	NM_001354418.1	162	-30.46	162	-30.46	30555	22	2022	22	RABL2A	GeneID:11159,Genbank:XM_017003211.1,HGNC:HGNC:9799,MIM:605412	RAB, member of RAS oncogene family like 2A	GO:0003924,GO:0005525	GTPase activity|GTP binding
hsa-miR-1180-3p	NM_001354419.1	162	-30.46	162	-30.46	30556	22	2026	22	RABL2A	GeneID:11159,Genbank:XM_017003211.1,HGNC:HGNC:9799,MIM:605412	RAB, member of RAS oncogene family like 2A	GO:0003924,GO:0005525	GTPase activity|GTP binding
hsa-miR-1180-3p	NM_001354421.1	162	-30.46	162	-30.46	30558	22	1992	22	RABL2A	GeneID:11159,Genbank:XM_017003211.1,HGNC:HGNC:9799,MIM:605412	RAB, member of RAS oncogene family like 2A	GO:0003924,GO:0005525	GTPase activity|GTP binding
hsa-miR-1180-3p	NM_001354423.1	162	-30.46	162	-30.46	30560	22	2151	22	RABL2A	GeneID:11159,Genbank:XM_017003211.1,HGNC:HGNC:9799,MIM:605412	RAB, member of RAS oncogene family like 2A	GO:0003924,GO:0005525	GTPase activity|GTP binding
hsa-miR-1180-3p	NM_001354424.1	162	-30.46	162	-30.46	30561	22	1989	22	RABL2A	GeneID:11159,Genbank:XM_017003211.1,HGNC:HGNC:9799,MIM:605412	RAB, member of RAS oncogene family like 2A	GO:0003924,GO:0005525	GTPase activity|GTP binding
hsa-miR-1180-3p	NM_001354425.1	162	-30.46	162	-30.46	30562	22	2237	22	RABL2A	GeneID:11159,Genbank:XM_017003211.1,HGNC:HGNC:9799,MIM:605412	RAB, member of RAS oncogene family like 2A	GO:0003924,GO:0005525	GTPase activity|GTP binding
hsa-miR-1180-3p	NM_001354426.1	162	-30.46	162	-30.46	30563	22	2180	22	RABL2A	GeneID:11159,Genbank:XM_017003211.1,HGNC:HGNC:9799,MIM:605412	RAB, member of RAS oncogene family like 2A	GO:0003924,GO:0005525	GTPase activity|GTP binding
hsa-miR-1180-3p	NM_001354427.1	162	-30.46	162	-30.46	30564	22	2104	22	RABL2A	GeneID:11159,Genbank:XM_017003211.1,HGNC:HGNC:9799,MIM:605412	RAB, member of RAS oncogene family like 2A	GO:0003924,GO:0005525	GTPase activity|GTP binding
hsa-miR-1180-3p	NM_001354428.1	162	-30.46	162	-30.46	30565	22	2101	22	RABL2A	GeneID:11159,Genbank:XM_017003211.1,HGNC:HGNC:9799,MIM:605412	RAB, member of RAS oncogene family like 2A	GO:0003924,GO:0005525	GTPase activity|GTP binding
hsa-miR-1180-3p	NM_001410.2	166	-31.01	166	-31.01	31204	22	10966	8909	MEGF8	GeneID:1954,Genbank:NM_001271938.1,HGNC:HGNC:3233,MIM:604267	multiple EGF like domains 8	GO:0003143,GO:0005509,GO:0005634,GO:0010468,GO:0016021,GO:0030326,GO:0030509,GO:0035108,GO:0042074,GO:0048704,GO:0048842,GO:0055113,GO:0060971,GO:0060972,GO:0060976,GO:0061371,GO:0070062,GO:0071907,GO:0097094,GO:0097155	embryonic heart tube morphogenesis|calcium ion binding|nucleus|regulation of gene expression|integral component of membrane|embryonic limb morphogenesis|BMP signaling pathway|limb morphogenesis|cell migration involved in gastrulation|embryonic skeletal system morphogenesis|positive regulation of axon extension involved in axon guidance|epiboly involved in gastrulation with mouth forming second|em…
hsa-miR-1180-3p	NM_001519.3	162	-30.96	162	-30.96	31298	22	3677	721	BRF1	GeneID:2972,Genbank:NM_001242787.1,HGNC:HGNC:11551,MIM:604902	BRF1, RNA polymerase III transcription initiation factor subunit	GO:0000126,GO:0001026,GO:0005654,GO:0006383,GO:0006384,GO:0009303,GO:0009304,GO:0017025,GO:0045945,GO:0046872,GO:0070897	transcription factor TFIIIB complex|TFIIIB-type transcription factor activity|nucleoplasm|transcription from RNA polymerase III promoter|transcription initiation from RNA polymerase III promoter|rRNA transcription|tRNA transcription|TBP-class protein binding|positive regulation of transcription from RNA polymerase III promoter|metal ion binding|DNA-templated transcriptional preinitiation complex …
hsa-miR-1180-3p	NM_001837.3	173	-33.01	173	-33.01	31577	22	1796	1276	CCR3	GeneID:1232,Genbank:XM_017005686.1,HGNC:HGNC:1604,MIM:601268	C-C motif chemokine receptor 3			path:hsa04060,path:hsa04062,path:hsa05163,path:hsa05167,path:hsa05203	Cytokine-cytokine receptor interaction|Chemokine signaling pathway|Human cytomegalovirus infection|Kaposi sarcoma-associated herpesvirus infection|Viral carcinogenesis
hsa-miR-1180-3p	NM_002109.5	159	-32.22	159	-32.22	31840	22	2322	272	HARS	GeneID:3035,Genbank:NM_001289094.1,HGNC:HGNC:4816,MIM:142810	histidyl-tRNA synthetase	GO:0004821,GO:0005524,GO:0005737,GO:0005739,GO:0005829,GO:0006412,GO:0006418,GO:0006427,GO:0032543,GO:0042802	histidine-tRNA ligase activity|ATP binding|cytoplasm|mitochondrion|cytosol|translation|tRNA aminoacylation for protein translation|histidyl-tRNA aminoacylation|mitochondrial translation|identical protein binding	path:hsa00970	Aminoacyl-tRNA biosynthesis
hsa-miR-1180-3p	NM_002419.3	161	-30.95	161	-30.95	32124	22	3574	3005	MAP3K11	GeneID:4296,Genbank:NM_002419.3,HGNC:HGNC:6850,MIM:600050	mitogen-activated protein kinase kinase kinase 11	GO:0000187,GO:0004672,GO:0004674,GO:0004706,GO:0005524,GO:0005737,GO:0005813,GO:0005874,GO:0006468,GO:0007017,GO:0007254,GO:0007257,GO:0008219,GO:0008283,GO:0016020,GO:0031434,GO:0031435,GO:0042802,GO:0042803,GO:0043065,GO:0043507,GO:0043525,GO:0046330,GO:0046777,GO:0048365	activation of MAPK activity|protein kinase activity|protein serine/threonine kinase activity|JUN kinase kinase kinase activity|ATP binding|cytoplasm|centrosome|microtubule|protein phosphorylation|microtubule-based process|JNK cascade|activation of JUN kinase activity|cell death|cell proliferation|membrane|mitogen-activated protein kinase kinase binding|mitogen-activated protein kinase kinase kina…	path:hsa04010,path:hsa04932	MAPK signaling pathway|Non-alcoholic fatty liver disease (NAFLD)
hsa-miR-1180-3p	NM_002504.5	167	-30.82	167	-30.82	32206	22	4709	65	NFX1	GeneID:4799,Genbank:NM_001318758.1,HGNC:HGNC:7803,MIM:603255	nuclear transcription factor, X-box binding 1	GO:0000122,GO:0000977,GO:0001078,GO:0003700,GO:0003723,GO:0005634,GO:0005730,GO:0005829,GO:0005886,GO:0006366,GO:0006954,GO:0008270,GO:0016032,GO:0016874,GO:0045347	negative regulation of transcription from RNA polymerase II promoter|RNA polymerase II regulatory region sequence-specific DNA binding|transcriptional repressor activity, RNA polymerase II proximal promoter sequence-specific DNA binding|DNA binding transcription factor activity|RNA binding|nucleus|nucleolus|cytosol|plasma membrane|transcription from RNA polymerase II promoter|inflammatory respons…	path:hsa05165	Human papillomavirus infection
hsa-miR-1180-3p	NM_002595.4	164	-37.15	164	-37.15	32295	22	4194	422	CDK17	GeneID:5128,Genbank:NM_002595.4,HGNC:HGNC:8750,MIM:603440	cyclin dependent kinase 17	GO:0004672,GO:0004674,GO:0005524,GO:0005634,GO:0005737,GO:0006468	protein kinase activity|protein serine/threonine kinase activity|ATP binding|nucleus|cytoplasm|protein phosphorylation
hsa-miR-1180-3p	NM_002720.2	158	-30.16	158	-30.16	32405	22	1429	3	PPP4C	GeneID:5531,Genbank:NM_001303503.1,HGNC:HGNC:9319,MIM:602035	protein phosphatase 4 catalytic subunit	GO:0004704,GO:0004722,GO:0005634,GO:0005654,GO:0005815,GO:0005829,GO:0005886,GO:0010569,GO:0030289,GO:0046872	NF-kappaB-inducing kinase activity|protein serine/threonine phosphatase activity|nucleus|nucleoplasm|microtubule organizing center|cytosol|plasma membrane|regulation of double-strand break repair via homologous recombination|protein phosphatase 4 complex|metal ion binding	path:hsa04922	Glucagon signaling pathway
hsa-miR-1180-3p	NM_002817.3	157	-30.09	157	-30.09	32499	22	1757	140	PSMD13	GeneID:5719,Genbank:NM_002817.3,HGNC:HGNC:9558,MIM:603481	proteasome 26S subunit, non-ATPase 13	GO:0000165,GO:0000209,GO:0000502,GO:0002223,GO:0002479,GO:0005198,GO:0005576,GO:0005634,GO:0005654,GO:0005829,GO:0005838,GO:0006511,GO:0006521,GO:0007127,GO:0008541,GO:0010972,GO:0016020,GO:0016579,GO:0022624,GO:0031145,GO:0031146,GO:0033209,GO:0034774,GO:0038061,GO:0038095,GO:0043161,GO:0043248,GO:0043312,GO:0043488,GO:0043687,GO:0050852,GO:0051436,GO:0051437,GO:0055085,GO:0060071,GO:0061418,GO:…	MAPK cascade|protein polyubiquitination|proteasome complex|stimulatory C-type lectin receptor signaling pathway|antigen processing and presentation of exogenous peptide antigen via MHC class I, TAP-dependent|structural molecule activity|extracellular region|nucleus|nucleoplasm|cytosol|proteasome regulatory particle|ubiquitin-dependent protein catabolic process|regulation of cellular amino acid me…	path:hsa03050,path:hsa05169	Proteasome|Epstein-Barr virus infection
hsa-miR-1180-3p	NM_002850.3	157	-31.84	157	-31.84	32532	22	7347	2149	PTPRS	GeneID:5802,Genbank:XM_017027066.1,HGNC:HGNC:9681,MIM:601576	protein tyrosine phosphatase, receptor type S	GO:0004721,GO:0004725,GO:0005886,GO:0005887,GO:0006470,GO:0007155,GO:0008201,GO:0010977,GO:0021510,GO:0021549,GO:0021766,GO:0021987,GO:0022038,GO:0030054,GO:0030285,GO:0030424,GO:0030517,GO:0032687,GO:0032688,GO:0034164,GO:0035335,GO:0035374,GO:0043204,GO:0043395,GO:0048671,GO:0048681,GO:0061000,GO:0070062,GO:0090557,GO:0099061	phosphoprotein phosphatase activity|protein tyrosine phosphatase activity|plasma membrane|integral component of plasma membrane|protein dephosphorylation|cell adhesion|heparin binding|negative regulation of neuron projection development|spinal cord development|cerebellum development|hippocampus development|cerebral cortex development|corpus callosum development|cell junction|integral component of…
hsa-miR-1180-3p	NM_002948.4	165	-31.63	165	-31.63	32627	22	2730	478	RPL15	GeneID:6138,Genbank:NM_001253384.2,HGNC:HGNC:10306,MIM:604174	ribosomal protein L15	GO:0002181,GO:0003723,GO:0003735,GO:0005634,GO:0016020,GO:0022625,GO:0031672,GO:0045296,GO:0045471,GO:0070062	cytoplasmic translation|RNA binding|structural constituent of ribosome|nucleus|membrane|cytosolic large ribosomal subunit|A band|cadherin binding|response to ethanol|extracellular exosome	path:hsa03010	Ribosome
hsa-miR-1180-3p	NM_003370.3	157	-30.15	157	-30.15	33011	22	2298	480	VASP	GeneID:7408,Genbank:NM_003370.3,HGNC:HGNC:12652,MIM:601703	vasodilator stimulated phosphoprotein	GO:0001843,GO:0003779,GO:0005522,GO:0005829,GO:0005886,GO:0005923,GO:0005925,GO:0007411,GO:0008154,GO:0015629,GO:0017124,GO:0030838,GO:0031258,GO:0031527,GO:0034329,GO:0045296,GO:0051289,GO:0070062	neural tube closure|actin binding|profilin binding|cytosol|plasma membrane|bicellular tight junction|focal adhesion|axon guidance|actin polymerization or depolymerization|actin cytoskeleton|SH3 domain binding|positive regulation of actin filament polymerization|lamellipodium membrane|filopodium membrane|cell junction assembly|cadherin binding|protein homotetramerization|extracellular exosome	path:hsa04015,path:hsa04022,path:hsa04510,path:hsa04530,path:hsa04611,path:hsa04666,path:hsa04670	Rap1 signaling pathway|cGMP-PKG signaling pathway|Focal adhesion|Tight junction|Platelet activation|Fc gamma R-mediated phagocytosis|Leukocyte transendothelial migration
hsa-miR-1180-3p	NM_003456.2	159	-31.3	159	-31.3	33091	22	2077	1292	ZNF205	GeneID:7755,Genbank:NM_003456.2,HGNC:HGNC:12996,MIM:603436	zinc finger protein 205	GO:0000122,GO:0000977,GO:0001227,GO:0005634,GO:0005739,GO:0006351,GO:0006355,GO:0008270,GO:0010729,GO:1901030	negative regulation of transcription from RNA polymerase II promoter|RNA polymerase II regulatory region sequence-specific DNA binding|transcriptional repressor activity, RNA polymerase II transcription regulatory region sequence-specific DNA binding|nucleus|mitochondrion|transcription, DNA-templated|regulation of transcription, DNA-templated|zinc ion binding|positive regulation of hydrogen perox…
hsa-miR-1180-3p	NM_003462.3	158	-31.27	158	-31.27	33097	22	2663	109	DNALI1	GeneID:7802,Genbank:NM_003462.3,HGNC:HGNC:14353,MIM:602135	dynein axonemal light intermediate chain 1	GO:0003774,GO:0005737,GO:0005930,GO:0030175,GO:0030286,GO:0045504	motor activity|cytoplasm|axoneme|filopodium|dynein complex|dynein heavy chain binding	path:hsa05016	Huntington disease
hsa-miR-1180-3p	NM_003598.1	160	-31.58	160	-31.58	33225	22	2220	270	TEAD2	GeneID:8463,Genbank:NM_001256662.1,HGNC:HGNC:11715,MIM:601729	TEA domain transcription factor 2	GO:0001085,GO:0001134,GO:0001223,GO:0001570,GO:0001843,GO:0003143,GO:0003700,GO:0003705,GO:0005634,GO:0005654,GO:0005829,GO:0006355,GO:0006367,GO:0006461,GO:0030903,GO:0035329,GO:0043231,GO:0043565,GO:0044212,GO:0045893,GO:0045944,GO:0046982,GO:0048339,GO:0048368,GO:0048568,GO:0060548,GO:0071149,GO:0071300,GO:0097718,GO:2000736	RNA polymerase II transcription factor binding|transcription factor activity, transcription factor recruiting|transcription coactivator binding|vasculogenesis|neural tube closure|embryonic heart tube morphogenesis|DNA binding transcription factor activity|transcription factor activity, RNA polymerase II distal enhancer sequence-specific binding|nucleus|nucleoplasm|cytosol|regulation of transcript…	path:hsa04390,path:hsa04392	Hippo signaling pathway|Hippo signaling pathway - multiple species
hsa-miR-1180-3p	NM_003631.4	162	-30.84	162	-30.84	33255	22	4312	4	PARG	GeneID:8505,Genbank:NM_001303486.2,HGNC:HGNC:8605,MIM:603501	poly(ADP-ribose) glycohydrolase	GO:0004649,GO:0005634,GO:0005654,GO:0005737,GO:0005759,GO:0005829,GO:0005975,GO:0043231,GO:1990966	poly(ADP-ribose) glycohydrolase activity|nucleus|nucleoplasm|cytoplasm|mitochondrial matrix|cytosol|carbohydrate metabolic process|intracellular membrane-bounded organelle|ATP generation from poly-ADP-D-ribose
hsa-miR-1180-3p	NM_003776.3	172	-32.31	172	-32.31	33391	22	1408	537	MRPL40	GeneID:64976,Genbank:NM_003776.3,HGNC:HGNC:14491,MIM:605089	mitochondrial ribosomal protein L40	GO:0003723,GO:0005634,GO:0005743,GO:0005761,GO:0005762,GO:0009653,GO:0070125,GO:0070126	RNA binding|nucleus|mitochondrial inner membrane|mitochondrial ribosome|mitochondrial large ribosomal subunit|anatomical structure morphogenesis|mitochondrial translational elongation|mitochondrial translational termination
hsa-miR-1180-3p	NM_003820.3	172	-32.31	172	-32.31	33433	22	3519	609	TNFRSF14	GeneID:8764,Genbank:NM_003820.3,HGNC:HGNC:11912,MIM:602746	TNF receptor superfamily member 14			path:hsa04060,path:hsa05168	Cytokine-cytokine receptor interaction|Herpes simplex infection
hsa-miR-1180-3p	NM_004322.3	160	-30.48	160	-30.48	33886	22	1240	1040	BAD	GeneID:572,Genbank:NM_032989.2,HGNC:HGNC:936,MIM:603167	BCL2 associated agonist of cell death			path:hsa01521,path:hsa01522,path:hsa01524,path:hsa04012,path:hsa04014,path:hsa04022,path:hsa04024,path:hsa04062,path:hsa04140,path:hsa04151,path:hsa04210,path:hsa04370,path:hsa04510,path:hsa04722,path:hsa04910,path:hsa04919,path:hsa05010,path:hsa05014,path:hsa05145,path:hsa05152,path:hsa05160,path:hsa05161,path:hsa05165,path:hsa05170,path:hsa05200,path:hsa05203,path:hsa05210,path:hsa05211,path:hs…	EGFR tyrosine kinase inhibitor resistance|Endocrine resistance|Platinum drug resistance|ErbB signaling pathway|Ras signaling pathway|cGMP-PKG signaling pathway|cAMP signaling pathway|Chemokine signaling pathway|Autophagy - animal|PI3K-Akt signaling pathway|Apoptosis|VEGF signaling pathway|Focal adhesion|Neurotrophin signaling pathway|Insulin signaling pathway|Thyroid hormone signaling pathway|Alz…
hsa-miR-1180-3p	NM_004561.3	166	-32.56	166	-32.56	34111	22	3039	461	OVOL1	GeneID:5017,Genbank:NM_004561.3,HGNC:HGNC:8525,MIM:602313	ovo like transcriptional repressor 1	GO:0000978,GO:0000981,GO:0001078,GO:0001822,GO:0005634,GO:0006351,GO:0007283,GO:0007498,GO:0008544,GO:0043588,GO:0046872,GO:0051729,GO:1901994,GO:2000647	RNA polymerase II proximal promoter sequence-specific DNA binding|RNA polymerase II transcription factor activity, sequence-specific DNA binding|transcriptional repressor activity, RNA polymerase II proximal promoter sequence-specific DNA binding|kidney development|nucleus|transcription, DNA-templated|spermatogenesis|mesoderm development|epidermis development|skin development|metal ion binding|ge…
hsa-miR-1180-3p	NM_004623.4	164	-31.23	164	-31.23	34170	22	2395	14	TTC4	GeneID:7268,Genbank:NM_004623.4,HGNC:HGNC:12394,MIM:606753	tetratricopeptide repeat domain 4
hsa-miR-1180-3p	NM_004715.4	167	-37.26	167	-37.26	34255	22	3765	368	CTDP1	GeneID:9150,Genbank:NM_004715.4,HGNC:HGNC:2498,MIM:604927	CTD phosphatase subunit 1	GO:0000922,GO:0001096,GO:0004721,GO:0005634,GO:0005654,GO:0005737,GO:0005813,GO:0005819,GO:0006366,GO:0006368,GO:0006470,GO:0008420,GO:0010458,GO:0016591,GO:0030496,GO:0030957,GO:0043231,GO:0043234,GO:0043923,GO:0050434,GO:0051233,GO:0051301,GO:0061052,GO:0070940	spindle pole|TFIIF-class transcription factor binding|phosphoprotein phosphatase activity|nucleus|nucleoplasm|cytoplasm|centrosome|spindle|transcription from RNA polymerase II promoter|transcription elongation from RNA polymerase II promoter|protein dephosphorylation|CTD phosphatase activity|exit from mitosis|DNA-directed RNA polymerase II, holoenzyme|midbody|Tat protein binding|intracellular mem…
hsa-miR-1180-3p	NM_004716.3	165	-30.99	165	-30.99	34256	22	3940	2746	PCSK7	GeneID:9159,Genbank:XM_024448764.1,HGNC:HGNC:8748,MIM:604872	proprotein convertase subtilisin/kexin type 7	GO:0004252,GO:0008233,GO:0016485,GO:0016486,GO:0030173	serine-type endopeptidase activity|peptidase activity|protein processing|peptide hormone processing|integral component of Golgi membrane
hsa-miR-1180-3p	NM_004809.4	158	-30.65	158	-30.65	34344	22	2041	15	STOML1	GeneID:9399,Genbank:NM_001256676.1,HGNC:HGNC:14560,MIM:608326	stomatin like 1	GO:0005886,GO:0006869,GO:0016021,GO:0031902,GO:0045121	plasma membrane|lipid transport|integral component of membrane|late endosome membrane|membrane raft
hsa-miR-1180-3p	NM_004887.4	159	-30.07	159	-30.07	34414	22	1989	365	CXCL14	GeneID:9547,Genbank:NM_004887.4,HGNC:HGNC:10640,MIM:604186	C-X-C motif chemokine ligand 14			path:hsa04060,path:hsa04062	Cytokine-cytokine receptor interaction|Chemokine signaling pathway
hsa-miR-1180-3p	NM_004897.4	163	-30.41	163	-30.41	34424	22	2906	382	MINPP1	GeneID:9562,Genbank:NM_004897.4,HGNC:HGNC:7102,MIM:605391	multiple inositol-polyphosphate phosphatase 1	GO:0001503,GO:0003993,GO:0005783,GO:0005788,GO:0006797,GO:0030282,GO:0030351,GO:0034417,GO:0043647,GO:0051717,GO:0052745,GO:0052826,GO:0070062,GO:0101006	ossification|acid phosphatase activity|endoplasmic reticulum|endoplasmic reticulum lumen|polyphosphate metabolic process|bone mineralization|inositol-1,3,4,5,6-pentakisphosphate 3-phosphatase activity|bisphosphoglycerate 3-phosphatase activity|inositol phosphate metabolic process|inositol-1,3,4,5-tetrakisphosphate 3-phosphatase activity|inositol phosphate phosphatase activity|inositol hexakisphos…	path:hsa00010,path:hsa00562	Glycolysis / Gluconeogenesis|Inositol phosphate metabolism
hsa-miR-1180-3p	NM_004931.4	162	-31.09	162	-31.09	34452	22	1433	365	CD8B	GeneID:926,Genbank:NM_001178100.1,HGNC:HGNC:1707,MIM:186730	CD8b molecule			path:hsa04514,path:hsa04612,path:hsa04640,path:hsa04660,path:hsa05340	Cell adhesion molecules (CAMs)|Antigen processing and presentation|Hematopoietic cell lineage|T cell receptor signaling pathway|Primary immunodeficiency
hsa-miR-1180-3p	NM_005253.3	162	-30.83	162	-30.83	34749	22	4015	576	FOSL2	GeneID:2355,Genbank:XM_006711976.3,HGNC:HGNC:3798,MIM:601575	FOS like 2, AP-1 transcription factor subunit	GO:0000977,GO:0001228,GO:0003334,GO:0003682,GO:0003700,GO:0005634,GO:0005654,GO:0006357,GO:0008219,GO:0045944,GO:0048146	RNA polymerase II regulatory region sequence-specific DNA binding|transcriptional activator activity, RNA polymerase II transcription regulatory region sequence-specific DNA binding|keratinocyte development|chromatin binding|DNA binding transcription factor activity|nucleus|nucleoplasm|regulation of transcription from RNA polymerase II promoter|cell death|positive regulation of transcription from…	path:hsa04380	Osteoclast differentiation
hsa-miR-1180-3p	NM_005761.2	172	-33.99	172	-33.99	35217	22	7346	744	PLXNC1	GeneID:10154,Genbank:NM_005761.2,HGNC:HGNC:9106,MIM:604259	plexin C1	GO:0005102,GO:0005886,GO:0007155,GO:0007162,GO:0008360,GO:0016020,GO:0016021,GO:0017154,GO:0043087,GO:0050772	receptor binding|plasma membrane|cell adhesion|negative regulation of cell adhesion|regulation of cell shape|membrane|integral component of membrane|semaphorin receptor activity|regulation of GTPase activity|positive regulation of axonogenesis	path:hsa04360	Axon guidance
hsa-miR-1180-3p	NM_005768.5	157	-30.1	157	-30.1	35224	22	2297	14	LPCAT3	GeneID:10162,Genbank:NM_005768.5,HGNC:HGNC:30244,MIM:611950	lysophosphatidylcholine acyltransferase 3	GO:0003841,GO:0005789,GO:0008654,GO:0016020,GO:0016021,GO:0036150,GO:0036151,GO:0036152,GO:0047144,GO:0047184,GO:0097006	1-acylglycerol-3-phosphate O-acyltransferase activity|endoplasmic reticulum membrane|phospholipid biosynthetic process|membrane|integral component of membrane|phosphatidylserine acyl-chain remodeling|phosphatidylcholine acyl-chain remodeling|phosphatidylethanolamine acyl-chain remodeling|2-acylglycerol-3-phosphate O-acyltransferase activity|1-acylglycerophosphocholine O-acyltransferase activity|r…	path:hsa00564,path:hsa04216	Glycerophospholipid metabolism|Ferroptosis
hsa-miR-1180-3p	NM_005881.3	165	-31.79	165	-31.79	35322	22	2144	874	BCKDK	GeneID:10295,Genbank:NM_001122957.2,HGNC:HGNC:16902,MIM:614901	branched chain ketoacid dehydrogenase kinase
hsa-miR-1180-3p	NM_005883.2	158	-30.33	158	-30.33	35324	22	10151	4826	APC2	GeneID:10297,Genbank:XM_005259475.2,HGNC:HGNC:24036,MIM:612034	APC2, WNT signaling pathway regulator	GO:0000226,GO:0005737,GO:0005794,GO:0005829,GO:0005874,GO:0005884,GO:0008013,GO:0008017,GO:0015630,GO:0016055,GO:0016342,GO:0030496,GO:0031258,GO:0035414,GO:0045171,GO:0048471,GO:0090090,GO:0090630	microtubule cytoskeleton organization|cytoplasm|Golgi apparatus|cytosol|microtubule|actin filament|beta-catenin binding|microtubule binding|microtubule cytoskeleton|Wnt signaling pathway|catenin complex|midbody|lamellipodium membrane|negative regulation of catenin import into nucleus|intercellular bridge|perinuclear region of cytoplasm|negative regulation of canonical Wnt signaling pathway|activa…	path:hsa04310,path:hsa04390,path:hsa04550,path:hsa04810,path:hsa04934,path:hsa05165,path:hsa05166,path:hsa05200,path:hsa05206,path:hsa05210,path:hsa05213,path:hsa05217,path:hsa05224,path:hsa05225,path:hsa05226	Wnt signaling pathway|Hippo signaling pathway|Signaling pathways regulating pluripotency of stem cells|Regulation of actin cytoskeleton|Cushing syndrome|Human papillomavirus infection|Human T-cell leukemia virus 1 infection|Pathways in cancer|MicroRNAs in cancer|Colorectal cancer|Endometrial cancer|Basal cell carcinoma|Breast cancer|Hepatocellular carcinoma|Gastric cancer
hsa-miR-1180-3p	NM_006013.4	159	-30.99	159	-30.99	35441	22	2500	47	RPL10	GeneID:6134,Genbank:NM_001303625.1,HGNC:HGNC:10298,MIM:312173	ribosomal protein L10	GO:0000027,GO:0000122,GO:0003723,GO:0003735,GO:0005634,GO:0005737,GO:0005790,GO:0006412,GO:0006417,GO:0016020,GO:0022625,GO:0043066,GO:0043234,GO:0045182,GO:0097421,GO:1990403	ribosomal large subunit assembly|negative regulation of transcription from RNA polymerase II promoter|RNA binding|structural constituent of ribosome|nucleus|cytoplasm|smooth endoplasmic reticulum|translation|regulation of translation|membrane|cytosolic large ribosomal subunit|negative regulation of apoptotic process|protein complex|translation regulator activity|liver regeneration|embryonic brain…	path:hsa03010	Ribosome
hsa-miR-1180-3p	NM_006052.1	167	-32.04	167	-32.04	35477	22	3252	192	VPS26C	GeneID:10311,Genbank:NM_001331018.1,HGNC:HGNC:3044,MIM:605298	VPS26 endosomal protein sorting factor C	GO:0005634,GO:0005768,GO:0006886,GO:0008565	nucleus|endosome|intracellular protein transport|protein transporter activity
hsa-miR-1180-3p	NM_006349.2	162	-30.98	162	-30.98	35751	22	1208	288	ZNHIT1	GeneID:10467,Genbank:NM_006349.2,HGNC:HGNC:21688	zinc finger HIT-type containing 1	GO:0000812,GO:0005634,GO:0005654,GO:0031063,GO:0031491,GO:0042826,GO:0043486,GO:0046872	Swr1 complex|nucleus|nucleoplasm|regulation of histone deacetylation|nucleosome binding|histone deacetylase binding|histone exchange|metal ion binding
hsa-miR-1180-3p	NM_006442.3	168	-34.13	168	-34.13	35840	22	1022	563	DRAP1	GeneID:10589,Genbank:NM_006442.3,HGNC:HGNC:3019,MIM:602289	DR1 associated protein 1	GO:0000122,GO:0003677,GO:0003700,GO:0003714,GO:0005634,GO:0006351,GO:0042802,GO:0046982	negative regulation of transcription from RNA polymerase II promoter|DNA binding|DNA binding transcription factor activity|transcription corepressor activity|nucleus|transcription, DNA-templated|identical protein binding|protein heterodimerization activity
hsa-miR-1180-3p	NM_006773.3	162	-30.47	162	-30.47	36140	22	3790	5	DDX18	GeneID:8886,Genbank:NM_006773.3,HGNC:HGNC:2741,MIM:606355	DEAD-box helicase 18	GO:0003723,GO:0004004,GO:0005524,GO:0005694,GO:0005730,GO:0005737,GO:0010501,GO:0016020,GO:0071392	RNA binding|ATP-dependent RNA helicase activity|ATP binding|chromosome|nucleolus|cytoplasm|RNA secondary structure unwinding|membrane|cellular response to estradiol stimulus
hsa-miR-1180-3p	NM_006842.2	163	-37	163	-37	36204	22	2902	2460	SF3B2	GeneID:10992,Genbank:NM_006842.2,HGNC:HGNC:10769,MIM:605591	splicing factor 3b subunit 2	GO:0000398,GO:0003723,GO:0005654,GO:0005681,GO:0005684,GO:0005686,GO:0005689,GO:0006397,GO:0008380,GO:0016032,GO:0016607,GO:0071011,GO:0071013	mRNA splicing, via spliceosome|RNA binding|nucleoplasm|spliceosomal complex|U2-type spliceosomal complex|U2 snRNP|U12-type spliceosomal complex|mRNA processing|RNA splicing|viral process|nuclear speck|precatalytic spliceosome|catalytic step 2 spliceosome	path:hsa03040	Spliceosome
hsa-miR-1180-3p	NM_006892.3	157	-30.58	157	-30.58	36247	22	4353	1920	DNMT3B	GeneID:1789,Genbank:NM_006892.3,HGNC:HGNC:2979,MIM:602900	DNA methyltransferase 3 beta			path:hsa00270,path:hsa05206	Cysteine and methionine metabolism|MicroRNAs in cancer
hsa-miR-1180-3p	NM_007082.4	162	-30.46	162	-30.46	36413	22	1154	22	RABL2A	GeneID:11159,Genbank:XM_017003211.1,HGNC:HGNC:9799,MIM:605412	RAB, member of RAS oncogene family like 2A	GO:0003924,GO:0005525	GTPase activity|GTP binding
hsa-miR-1180-3p	NM_007243.2	168	-32.81	168	-32.81	36548	22	1767	205	NRM	GeneID:11270,Genbank:NM_007243.2,HGNC:HGNC:8003	nurim	GO:0005635,GO:0005637,GO:0016020,GO:0016021,GO:0031965	nuclear envelope|nuclear inner membrane|membrane|integral component of membrane|nuclear membrane
hsa-miR-1180-3p	NM_007279.2	160	-31.11	160	-31.11	36581	22	3148	941	U2AF2	GeneID:11338,Genbank:NM_007279.2,HGNC:HGNC:23156,MIM:191318	U2 small nuclear RNA auxiliary factor 2	GO:0000243,GO:0000398,GO:0003723,GO:0005634,GO:0005654,GO:0005681,GO:0006369,GO:0006397,GO:0006405,GO:0006406,GO:0008187,GO:0016607,GO:0019899,GO:0030628,GO:0031124,GO:0031397,GO:0033120,GO:0048025,GO:0070742,GO:0071004,GO:0089701,GO:1903146,GO:1903955	commitment complex|mRNA splicing, via spliceosome|RNA binding|nucleus|nucleoplasm|spliceosomal complex|termination of RNA polymerase II transcription|mRNA processing|RNA export from nucleus|mRNA export from nucleus|poly-pyrimidine tract binding|nuclear speck|enzyme binding|pre-mRNA 3'-splice site binding|mRNA 3'-end processing|negative regulation of protein ubiquitination|positive regulation of R…	path:hsa03040	Spliceosome
hsa-miR-1180-3p	NM_013412.3	162	-30.46	162	-30.46	37170	22	2198	22	RABL2A	GeneID:11159,Genbank:XM_017003211.1,HGNC:HGNC:9799,MIM:605412	RAB, member of RAS oncogene family like 2A	GO:0003924,GO:0005525	GTPase activity|GTP binding
hsa-miR-1180-3p	NM_013978.2	167	-32.13	167	-32.13	37221	22	1157	548	BNIP1	GeneID:662,Genbank:NM_013979.2,HGNC:HGNC:1082,MIM:603291	BCL2 interacting protein 1			path:hsa04130	SNARE interactions in vesicular transport
hsa-miR-1180-3p	NM_013979.2	167	-32.13	167	-32.13	37222	22	1388	779	BNIP1	GeneID:662,Genbank:NM_013979.2,HGNC:HGNC:1082,MIM:603291	BCL2 interacting protein 1			path:hsa04130	SNARE interactions in vesicular transport
hsa-miR-1180-3p	NM_013980.2	167	-32.13	167	-32.13	37223	22	1286	677	BNIP1	GeneID:662,Genbank:NM_013979.2,HGNC:HGNC:1082,MIM:603291	BCL2 interacting protein 1			path:hsa04130	SNARE interactions in vesicular transport
hsa-miR-1180-3p	NM_014706.3	161	-30.1	161	-30.1	37766	22	4377	1801	SART3	GeneID:9733,Genbank:NM_014706.3,HGNC:HGNC:16860,MIM:611684	squamous cell carcinoma antigen recognized by T cells 3	GO:0000244,GO:0000387,GO:0000398,GO:0000902,GO:0003723,GO:0005634,GO:0005654,GO:0005737,GO:0006334,GO:0010468,GO:0015030,GO:0016607,GO:0017070,GO:0030621,GO:0030624,GO:0042393,GO:0048872,GO:0071425,GO:1903586,GO:1990381	spliceosomal tri-snRNP complex assembly|spliceosomal snRNP assembly|mRNA splicing, via spliceosome|cell morphogenesis|RNA binding|nucleus|nucleoplasm|cytoplasm|nucleosome assembly|regulation of gene expression|Cajal body|nuclear speck|U6 snRNA binding|U4 snRNA binding|U6atac snRNA binding|histone binding|homeostasis of number of cells|hematopoietic stem cell proliferation|positive regulation of h…
hsa-miR-1180-3p	NM_014963.2	173	-36.28	173	-36.28	38000	22	4948	1121	SBNO2	GeneID:22904,Genbank:NM_014963.2,HGNC:HGNC:29158,MIM:615729	strawberry notch homolog 2
hsa-miR-1180-3p	NM_015160.2	161	-32.53	161	-32.53	38162	22	2182	1497	PMPCA	GeneID:23203,Genbank:NM_015160.2,HGNC:HGNC:18667,MIM:613036	peptidase, mitochondrial processing alpha subunit	GO:0004222,GO:0005615,GO:0005739,GO:0005743,GO:0005759,GO:0006508,GO:0006627,GO:0006851,GO:0008270	metalloendopeptidase activity|extracellular space|mitochondrion|mitochondrial inner membrane|mitochondrial matrix|proteolysis|protein processing involved in protein targeting to mitochondrion|mitochondrial calcium ion transmembrane transport|zinc ion binding
hsa-miR-1180-3p	NM_015215.3	161	-32.23	161	-32.23	38210	22	8444	1608	CAMTA1	GeneID:23261,Genbank:NM_015215.3,HGNC:HGNC:18806,MIM:611501	calmodulin binding transcription activator 1
hsa-miR-1180-3p	NM_015278.4	169	-33.52	169	-33.52	38262	22	7717	537	SASH1	GeneID:23328,Genbank:XM_017010599.1,HGNC:HGNC:19182,MIM:607955	SAM and SH3 domain containing 1	GO:0000209,GO:0008022,GO:0010595,GO:0019901,GO:0031435,GO:0031666,GO:0032947,GO:0043234,GO:0043507,GO:0045766,GO:1900044,GO:1900745,GO:1901224,GO:1902498	protein polyubiquitination|protein C-terminus binding|positive regulation of endothelial cell migration|protein kinase binding|mitogen-activated protein kinase kinase kinase binding|positive regulation of lipopolysaccharide-mediated signaling pathway|protein complex scaffold activity|protein complex|positive regulation of JUN kinase activity|positive regulation of angiogenesis|regulation of prote…
hsa-miR-1180-3p	NM_015456.4	155	-30.12	155	-30.12	38403	22	2629	1994	NELFB	GeneID:25920,Genbank:NM_015456.4,HGNC:HGNC:24324,MIM:611180	negative elongation factor complex member B	GO:0003723,GO:0005654,GO:0005737,GO:0006366,GO:0006368,GO:0032021,GO:0034244,GO:0050434	RNA binding|nucleoplasm|cytoplasm|transcription from RNA polymerase II promoter|transcription elongation from RNA polymerase II promoter|NELF complex|negative regulation of transcription elongation from RNA polymerase II promoter|positive regulation of viral transcription
hsa-miR-1180-3p	NM_015465.4	172	-30.12	172	-30.12	38412	22	5404	2433	GEMIN5	GeneID:25929,Genbank:NM_001252156.1,HGNC:HGNC:20043,MIM:607005	gem nuclear organelle associated protein 5	GO:0000340,GO:0000387,GO:0000398,GO:0003723,GO:0003730,GO:0005654,GO:0005737,GO:0005829,GO:0006412,GO:0006417,GO:0006461,GO:0016020,GO:0016604,GO:0017069,GO:0030619,GO:0030621,GO:0030622,GO:0032797,GO:0034718,GO:0034719,GO:0043022,GO:0051170,GO:0097504	RNA 7-methylguanosine cap binding|spliceosomal snRNP assembly|mRNA splicing, via spliceosome|RNA binding|mRNA 3'-UTR binding|nucleoplasm|cytoplasm|cytosol|translation|regulation of translation|protein complex assembly|membrane|nuclear body|snRNA binding|U1 snRNA binding|U4 snRNA binding|U4atac snRNA binding|SMN complex|SMN-Gemin2 complex|SMN-Sm protein complex|ribosome binding|nuclear import|Gemi…	path:hsa03013	RNA transport
hsa-miR-1180-3p	NM_015497.4	154	-30.83	154	-30.83	38436	22	3110	103	TMEM87A	GeneID:25963,Genbank:NM_001286487.1,HGNC:HGNC:24522	transmembrane protein 87A	GO:0005829,GO:0016021,GO:0032580,GO:0042147	cytosol|integral component of membrane|Golgi cisterna membrane|retrograde transport, endosome to Golgi
hsa-miR-1180-3p	NM_015656.1	167	-32.27	167	-32.27	38540	22	6757	2610	KIF26A	GeneID:26153,Genbank:NM_015656.1,HGNC:HGNC:20226,MIM:613231	kinesin family member 26A	GO:0001560,GO:0003777,GO:0005524,GO:0005829,GO:0005871,GO:0005874,GO:0006890,GO:0007018,GO:0008017,GO:0009968,GO:0019886,GO:0048484	regulation of cell growth by extracellular stimulus|microtubule motor activity|ATP binding|cytosol|kinesin complex|microtubule|retrograde vesicle-mediated transport, Golgi to ER|microtubule-based movement|microtubule binding|negative regulation of signal transduction|antigen processing and presentation of exogenous peptide antigen via MHC class II|enteric nervous system development
hsa-miR-1180-3p	NM_015676.2	165	-30.55	165	-30.55	38554	22	926	4	TMEM251	GeneID:26175,Genbank:NM_015676.2,HGNC:HGNC:20218	transmembrane protein 251	GO:0016021	integral component of membrane
hsa-miR-1180-3p	NM_016025.4	156	-30.81	156	-30.81	38741	22	3267	45	METTL9	GeneID:51108,Genbank:NM_001288659.1,HGNC:HGNC:24586,MIM:609388	methyltransferase like 9
hsa-miR-1180-3p	NM_016102.3	168	-30.16	168	-30.16	38810	22	2085	1495	TRIM17	GeneID:51127,Genbank:XM_011544210.3,HGNC:HGNC:13430,MIM:606123	tripartite motif containing 17	GO:0004842,GO:0005622,GO:0006914,GO:0008270,GO:0030674,GO:0032880,GO:0051865	ubiquitin-protein transferase activity|intracellular|autophagy|zinc ion binding|protein binding, bridging|regulation of protein localization|protein autoubiquitination
hsa-miR-1180-3p	NM_017438.4	176	-35.92	176	-35.92	39302	22	3301	242	SETD4	GeneID:54093,Genbank:XM_011529642.2,HGNC:HGNC:1258	SET domain containing 4	GO:0005730,GO:0016279,GO:0018023,GO:0018026,GO:0042254	nucleolus|protein-lysine N-methyltransferase activity|peptidyl-lysine trimethylation|peptidyl-lysine monomethylation|ribosome biogenesis
hsa-miR-1180-3p	NM_018093.3	171	-30.42	171	-30.42	39808	22	1390	118	WDR74	GeneID:54663,Genbank:XM_024448586.1,HGNC:HGNC:25529	WD repeat domain 74	GO:0005634,GO:0005730,GO:0030687,GO:0042273	nucleus|nucleolus|preribosome, large subunit precursor|ribosomal large subunit biogenesis
hsa-miR-1180-3p	NM_018210.3	176	-36.3	176	-36.3	39913	22	2756	96	NAXD	GeneID:55739,Genbank:NM_001242882.1,HGNC:HGNC:25576,MIM:615910	NAD(P)HX dehydratase	GO:0005524,GO:0005739,GO:0047453,GO:0052855	ATP binding|mitochondrion|ATP-dependent NAD(P)H-hydrate dehydratase activity|ADP-dependent NAD(P)H-hydrate dehydratase activity
hsa-miR-1180-3p	NM_018381.3	165	-32.09	165	-32.09	40061	22	2150	979	C19orf66	GeneID:55337,Genbank:NM_018381.3,HGNC:HGNC:25649,MIM:616808	chromosome 19 open reading frame 66	GO:0003723,GO:0005634,GO:0005654,GO:0005737,GO:0005829,GO:0034340,GO:0034341,GO:0034342,GO:0045071,GO:0051607	RNA binding|nucleus|nucleoplasm|cytoplasm|cytosol|response to type I interferon|response to interferon-gamma|response to type III interferon|negative regulation of viral genome replication|defense response to virus
hsa-miR-1180-3p	NM_018645.5	163	-34.63	163	-34.63	40184	22	1470	67	HES6	GeneID:55502,Genbank:NM_001142853.2,HGNC:HGNC:18254,MIM:610331	hes family bHLH transcription factor 6	GO:0000977,GO:0001227,GO:0003700,GO:0003712,GO:0005634,GO:0005667,GO:0006351,GO:0006355,GO:0007399,GO:0008134,GO:0030154,GO:0046983	RNA polymerase II regulatory region sequence-specific DNA binding|transcriptional repressor activity, RNA polymerase II transcription regulatory region sequence-specific DNA binding|DNA binding transcription factor activity|transcription cofactor activity|nucleus|transcription factor complex|transcription, DNA-templated|regulation of transcription, DNA-templated|nervous system development|transcr…	path:hsa05165	Human papillomavirus infection
hsa-miR-1180-3p	NM_020475.2	161	-34.22	161	-34.22	40800	22	8165	1762	ANK1	GeneID:286,Genbank:NM_001142446.1,HGNC:HGNC:492,MIM:612641	ankyrin 1			path:hsa05205	Proteoglycans in cancer
hsa-miR-1180-3p	NM_020476.2	161	-34.22	161	-34.22	40801	22	8240	1762	ANK1	GeneID:286,Genbank:NM_001142446.1,HGNC:HGNC:492,MIM:612641	ankyrin 1			path:hsa05205	Proteoglycans in cancer
hsa-miR-1180-3p	NM_020477.2	161	-34.22	161	-34.22	40802	22	7754	1762	ANK1	GeneID:286,Genbank:NM_001142446.1,HGNC:HGNC:492,MIM:612641	ankyrin 1			path:hsa05205	Proteoglycans in cancer
hsa-miR-1180-3p	NM_020686.5	169	-31.23	169	-31.23	40865	22	4814	35	ABAT	GeneID:18,Genbank:NM_020686.5,HGNC:HGNC:23,MIM:137150	4-aminobutyrate aminotransferase			path:hsa00250,path:hsa00280,path:hsa00410,path:hsa00640,path:hsa00650,path:hsa04727	Alanine, aspartate and glutamate metabolism|Valine, leucine and isoleucine degradation|beta-Alanine metabolism|Propanoate metabolism|Butanoate metabolism|GABAergic synapse
hsa-miR-1180-3p	NM_020731.4	180	-38.06	180	-38.06	40903	22	5676	74	AHRR	GeneID:57491,Genbank:NM_020731.4,HGNC:HGNC:346,MIM:606517	aryl-hydrocarbon receptor repressor	GO:0001191,GO:0003677,GO:0005654,GO:0005829,GO:0006351,GO:0006805,GO:0009410,GO:0046983	transcriptional repressor activity, RNA polymerase II transcription factor binding|DNA binding|nucleoplasm|cytosol|transcription, DNA-templated|xenobiotic metabolic process|response to xenobiotic stimulus|protein dimerization activity
hsa-miR-1180-3p	NM_020924.3	158	-30.1	158	-30.1	41059	22	2050	1070	ZBTB26	GeneID:57684,Genbank:NM_020924.3,HGNC:HGNC:23383	zinc finger and BTB domain containing 26	GO:0003677,GO:0005634,GO:0006351,GO:0006355,GO:0042802,GO:0046872	DNA binding|nucleus|transcription, DNA-templated|regulation of transcription, DNA-templated|identical protein binding|metal ion binding
hsa-miR-1180-3p	NM_021188.2	165	-30.4	165	-30.4	41258	22	2645	218	ZNF410	GeneID:57862,Genbank:NM_001242924.1,HGNC:HGNC:20144	zinc finger protein 410	GO:0003677,GO:0005634,GO:0006351,GO:0006355,GO:0046872	DNA binding|nucleus|transcription, DNA-templated|regulation of transcription, DNA-templated|metal ion binding
hsa-miR-1180-3p	NM_021959.2	166	-40.39	166	-40.39	41469	22	1664	45	PPP1R11	GeneID:6992,Genbank:XM_006715174.4,HGNC:HGNC:9285,MIM:606670	protein phosphatase 1 regulatory inhibitor subunit 11	GO:0000164,GO:0004865,GO:0005634,GO:0005737,GO:0008157,GO:0032515,GO:0042787,GO:0050710,GO:0050830,GO:0061630	protein phosphatase type 1 complex|protein serine/threonine phosphatase inhibitor activity|nucleus|cytoplasm|protein phosphatase 1 binding|negative regulation of phosphoprotein phosphatase activity|protein ubiquitination involved in ubiquitin-dependent protein catabolic process|negative regulation of cytokine secretion|defense response to Gram-positive bacterium|ubiquitin protein ligase activity
hsa-miR-1180-3p	NM_022132.4	166	-30.39	166	-30.39	41584	22	3696	1464	MCCC2	GeneID:64087,Genbank:NM_022132.4,HGNC:HGNC:6937,MIM:609014	methylcrotonoyl-CoA carboxylase 2	GO:0002169,GO:0004485,GO:0005524,GO:0005739,GO:0005759,GO:0005829,GO:0006552,GO:0006768,GO:0009083,GO:0015936,GO:0051291,GO:1905202	3-methylcrotonyl-CoA carboxylase complex, mitochondrial|methylcrotonoyl-CoA carboxylase activity|ATP binding|mitochondrion|mitochondrial matrix|cytosol|leucine catabolic process|biotin metabolic process|branched-chain amino acid catabolic process|coenzyme A metabolic process|protein heterooligomerization|methylcrotonoyl-CoA carboxylase complex	path:hsa00280	Valine, leucine and isoleucine degradation
hsa-miR-1180-3p	NM_023926.4	164	-30.41	164	-30.41	41935	22	2960	1849	ZSCAN18	GeneID:65982,Genbank:XM_006723335.2,HGNC:HGNC:21037	zinc finger and SCAN domain containing 18	GO:0000981,GO:0003677,GO:0005634,GO:0006351,GO:0046872	RNA polymerase II transcription factor activity, sequence-specific DNA binding|DNA binding|nucleus|transcription, DNA-templated|metal ion binding
hsa-miR-1180-3p	NM_023936.1	163	-35.42	163	-35.42	41945	22	1020	472	MRPS34	GeneID:65993,Genbank:XM_017023595.1,HGNC:HGNC:16618,MIM:611994	mitochondrial ribosomal protein S34	GO:0003735,GO:0005739,GO:0005743,GO:0005763,GO:0032543,GO:0070125,GO:0070126	structural constituent of ribosome|mitochondrion|mitochondrial inner membrane|mitochondrial small ribosomal subunit|mitochondrial translation|mitochondrial translational elongation|mitochondrial translational termination
hsa-miR-1180-3p	NM_024599.5	162	-30.96	162	-30.96	42213	22	3615	339	RHBDF2	GeneID:79651,Genbank:XM_011525250.2,HGNC:HGNC:20788,MIM:614404	rhomboid 5 homolog 2	GO:0005789,GO:0005886,GO:0006508,GO:0015031,GO:0016021,GO:0019838,GO:0042058,GO:0050708,GO:0050709	endoplasmic reticulum membrane|plasma membrane|proteolysis|protein transport|integral component of membrane|growth factor binding|regulation of epidermal growth factor receptor signaling pathway|regulation of protein secretion|negative regulation of protein secretion
hsa-miR-1180-3p	NM_024656.3	175	-35.3	175	-35.3	42261	22	3724	1509	COLGALT1	GeneID:79709,Genbank:NM_024656.3,HGNC:HGNC:26182,MIM:617531	collagen beta(1-O)galactosyltransferase 1	GO:0005788,GO:0016020,GO:0050211,GO:1904028	endoplasmic reticulum lumen|membrane|procollagen galactosyltransferase activity|positive regulation of collagen fibril organization	path:hsa00310,path:hsa00514	Lysine degradation|Other types of O-glycan biosynthesis
hsa-miR-1180-3p	NM_024719.3	159	-33.76	159	-33.76	42316	22	1432	1	GRTP1	GeneID:79774,Genbank:XM_017020755.2,HGNC:HGNC:20310	growth hormone regulated TBC protein 1	GO:0005096,GO:0005622,GO:0006886,GO:0012505,GO:0017137,GO:0031338,GO:0090630	GTPase activator activity|intracellular|intracellular protein transport|endomembrane system|Rab GTPase binding|regulation of vesicle fusion|activation of GTPase activity
hsa-miR-1180-3p	NM_024729.3	162	-34.16	162	-34.16	42323	22	6807	3341	MYH14	GeneID:79784,Genbank:XM_011527320.2,HGNC:HGNC:23212,MIM:608568	myosin heavy chain 14	GO:0000146,GO:0001725,GO:0003009,GO:0005516,GO:0005524,GO:0005829,GO:0005903,GO:0007519,GO:0007605,GO:0008360,GO:0016020,GO:0016460,GO:0016887,GO:0019228,GO:0030048,GO:0030424,GO:0030426,GO:0030898,GO:0031032,GO:0042641,GO:0043209,GO:0051015,GO:0070062,GO:0070584,GO:0071625,GO:0097513	microfilament motor activity|stress fiber|skeletal muscle contraction|calmodulin binding|ATP binding|cytosol|brush border|skeletal muscle tissue development|sensory perception of sound|regulation of cell shape|membrane|myosin II complex|ATPase activity|neuronal action potential|actin filament-based movement|axon|growth cone|actin-dependent ATPase activity|actomyosin structure organization|actomyo…	path:hsa04530,path:hsa04810,path:hsa05132	Tight junction|Regulation of actin cytoskeleton|Salmonella infection
hsa-miR-1180-3p	NM_025195.3	163	-33.48	163	-33.48	42616	22	3649	1083	TRIB1	GeneID:10221,Genbank:NM_025195.3,HGNC:HGNC:16891,MIM:609461	tribbles pseudokinase 1	GO:0004860,GO:0005634,GO:0005737,GO:0006469,GO:0007254,GO:0008134,GO:0014912,GO:0031434,GO:0031625,GO:0031665,GO:0032436,GO:0032496,GO:0043405,GO:0043433,GO:0045645,GO:0045651,GO:0045659,GO:0048662,GO:0055106	protein kinase inhibitor activity|nucleus|cytoplasm|negative regulation of protein kinase activity|JNK cascade|transcription factor binding|negative regulation of smooth muscle cell migration|mitogen-activated protein kinase kinase binding|ubiquitin protein ligase binding|negative regulation of lipopolysaccharide-mediated signaling pathway|positive regulation of proteasomal ubiquitin-dependent pr…
hsa-miR-1180-3p	NM_031448.4	161	-30.46	161	-30.46	42994	22	4683	243	C19orf12	GeneID:83636,Genbank:NM_001256047.1,HGNC:HGNC:25443,MIM:614297	chromosome 19 open reading frame 12	GO:0005739,GO:0005783,GO:0005829,GO:0006914,GO:0006915,GO:0006979,GO:0016021,GO:0031966,GO:0051560	mitochondrion|endoplasmic reticulum|cytosol|autophagy|apoptotic process|response to oxidative stress|integral component of membrane|mitochondrial membrane|mitochondrial calcium ion homeostasis
hsa-miR-1180-3p	NM_032188.2	166	-32.61	166	-32.61	43251	22	1546	155	KAT8	GeneID:84148,Genbank:NM_182958.2,HGNC:HGNC:17933,MIM:609912	lysine acetyltransferase 8	GO:0000123,GO:0000776,GO:0004402,GO:0005634,GO:0005654,GO:0006351,GO:0008134,GO:0010506,GO:0016407,GO:0016573,GO:0019899,GO:0030099,GO:0035064,GO:0043981,GO:0043982,GO:0043984,GO:0045892,GO:0045893,GO:0046872,GO:0071339,GO:0072487	histone acetyltransferase complex|kinetochore|histone acetyltransferase activity|nucleus|nucleoplasm|transcription, DNA-templated|transcription factor binding|regulation of autophagy|acetyltransferase activity|histone acetylation|enzyme binding|myeloid cell differentiation|methylated histone binding|histone H4-K5 acetylation|histone H4-K8 acetylation|histone H4-K16 acetylation|negative regulation…
hsa-miR-1180-3p	NM_032349.3	164	-30.4	164	-30.4	43365	22	1367	689	NUDT16L1	GeneID:84309,Genbank:XM_005255633.5,HGNC:HGNC:28154,MIM:617338	nudix hydrolase 16 like 1	GO:0003723,GO:0005634,GO:0016787,GO:0030515,GO:2001033	RNA binding|nucleus|hydrolase activity|snoRNA binding|negative regulation of double-strand break repair via nonhomologous end joining	path:hsa05205	Proteoglycans in cancer
hsa-miR-1180-3p	NM_032595.4	169	-30.82	169	-30.82	43552	22	4072	1325	PPP1R9B	GeneID:84687,Genbank:NM_032595.4,HGNC:HGNC:9298,MIM:603325	protein phosphatase 1 regulatory subunit 9B
hsa-miR-1180-3p	NM_032667.6	172	-31.27	172	-31.27	43593	22	1520	1	BSCL2	GeneID:26580,Genbank:NM_001122955.3,HGNC:HGNC:15832,MIM:606158	BSCL2, seipin lipid droplet biogenesis associated	GO:0016042,GO:0019915,GO:0030176,GO:0034389,GO:0045444,GO:0050995	lipid catabolic process|lipid storage|integral component of endoplasmic reticulum membrane|lipid particle organization|fat cell differentiation|negative regulation of lipid catabolic process
hsa-miR-1180-3p	NM_032837.2	162	-33.52	162	-33.52	43689	22	2842	471	FAM104A	GeneID:84923,Genbank:NM_001289410.1,HGNC:HGNC:25918	family with sequence similarity 104 member A
hsa-miR-1180-3p	NM_032859.2	171	-36.24	171	-36.24	43708	22	5316	54	ABHD13	GeneID:84945,Genbank:NM_032859.2,HGNC:HGNC:20293	abhydrolase domain containing 13	GO:0002084,GO:0008474,GO:0016020,GO:0016021,GO:0032839	protein depalmitoylation|palmitoyl-(protein) hydrolase activity|membrane|integral component of membrane|dendrite cytoplasm
hsa-miR-1180-3p	NM_032989.2	160	-30.48	160	-30.48	43793	22	986	786	BAD	GeneID:572,Genbank:NM_032989.2,HGNC:HGNC:936,MIM:603167	BCL2 associated agonist of cell death			path:hsa01521,path:hsa01522,path:hsa01524,path:hsa04012,path:hsa04014,path:hsa04022,path:hsa04024,path:hsa04062,path:hsa04140,path:hsa04151,path:hsa04210,path:hsa04370,path:hsa04510,path:hsa04722,path:hsa04910,path:hsa04919,path:hsa05010,path:hsa05014,path:hsa05145,path:hsa05152,path:hsa05160,path:hsa05161,path:hsa05165,path:hsa05170,path:hsa05200,path:hsa05203,path:hsa05210,path:hsa05211,path:hs…	EGFR tyrosine kinase inhibitor resistance|Endocrine resistance|Platinum drug resistance|ErbB signaling pathway|Ras signaling pathway|cGMP-PKG signaling pathway|cAMP signaling pathway|Chemokine signaling pathway|Autophagy - animal|PI3K-Akt signaling pathway|Apoptosis|VEGF signaling pathway|Focal adhesion|Neurotrophin signaling pathway|Insulin signaling pathway|Thyroid hormone signaling pathway|Alz…
hsa-miR-1180-3p	NM_033067.2	166	-31.5	166	-31.5	43852	22	1923	416	DMRTB1	GeneID:63948,Genbank:NM_033067.2,HGNC:HGNC:13913,MIM:614805	DMRT like family B with proline rich C-terminal 1	GO:0003700,GO:0005634,GO:0006351,GO:0043565,GO:0046872	DNA binding transcription factor activity|nucleus|transcription, DNA-templated|sequence-specific DNA binding|metal ion binding
hsa-miR-1180-3p	NM_033119.4	167	-32.04	167	-32.04	43888	22	8716	1107	NKD1	GeneID:85407,Genbank:NM_033119.4,HGNC:HGNC:17045,MIM:607851	naked cuticle homolog 1	GO:0001754,GO:0005509,GO:0005737,GO:0005886,GO:0007525,GO:0016055,GO:0030165,GO:0045732,GO:0090090,GO:0090249,GO:1901231,GO:1901233,GO:2000096	eye photoreceptor cell differentiation|calcium ion binding|cytoplasm|plasma membrane|somatic muscle development|Wnt signaling pathway|PDZ domain binding|positive regulation of protein catabolic process|negative regulation of canonical Wnt signaling pathway|regulation of cell motility involved in somitogenic axis elongation|positive regulation of non-canonical Wnt signaling pathway via JNK cascade…	path:hsa04310,path:hsa04390	Wnt signaling pathway|Hippo signaling pathway
hsa-miR-1180-3p	NM_033129.3	162	-33.23	162	-33.23	43898	22	3594	1794	SCRT2	GeneID:85508,Genbank:NM_033129.3,HGNC:HGNC:15952	scratch family transcriptional repressor 2	GO:0000122,GO:0000790,GO:0001078,GO:0003677,GO:0006351,GO:0046872,GO:1902042,GO:2001222	negative regulation of transcription from RNA polymerase II promoter|nuclear chromatin|transcriptional repressor activity, RNA polymerase II proximal promoter sequence-specific DNA binding|DNA binding|transcription, DNA-templated|metal ion binding|negative regulation of extrinsic apoptotic signaling pathway via death domain receptors|regulation of neuron migration
hsa-miR-1180-3p	NM_033133.4	163	-30.98	163	-30.98	43902	22	5222	1356	CNP	GeneID:1267,Genbank:NM_033133.4,HGNC:HGNC:2158,MIM:123830	2',3'-cyclic nucleotide 3' phosphodiesterase	GO:0000226,GO:0003723,GO:0004113,GO:0005615,GO:0005634,GO:0005654,GO:0005737,GO:0005741,GO:0005743,GO:0005829,GO:0005874,GO:0005886,GO:0005902,GO:0007268,GO:0007409,GO:0007568,GO:0008344,GO:0009214,GO:0009636,GO:0016020,GO:0021762,GO:0030551,GO:0030900,GO:0031143,GO:0032496,GO:0035748,GO:0035749,GO:0042470,GO:0046902,GO:0048471,GO:0048709,GO:0070062	microtubule cytoskeleton organization|RNA binding|2',3'-cyclic-nucleotide 3'-phosphodiesterase activity|extracellular space|nucleus|nucleoplasm|cytoplasm|mitochondrial outer membrane|mitochondrial inner membrane|cytosol|microtubule|plasma membrane|microvillus|chemical synaptic transmission|axonogenesis|aging|adult locomotory behavior|cyclic nucleotide catabolic process|response to toxic substance…
hsa-miR-1180-3p	NM_033212.3	160	-31.13	160	-31.13	43955	22	2450	726	CCDC102A	GeneID:92922,Genbank:XM_011523469.2,HGNC:HGNC:28097	coiled-coil domain containing 102A	GO:0003774,GO:0016459	motor activity|myosin complex
hsa-miR-1180-3p	NM_033415.3	160	-33.93	160	-33.93	44078	22	2397	264	ARMC6	GeneID:93436,Genbank:NM_001199196.1,HGNC:HGNC:25049	armadillo repeat containing 6	GO:0002244,GO:0005829	hematopoietic progenitor cell differentiation|cytosol
hsa-miR-1180-3p	NM_048368.3	167	-37.26	167	-37.26	44169	22	3602	368	CTDP1	GeneID:9150,Genbank:NM_004715.4,HGNC:HGNC:2498,MIM:604927	CTD phosphatase subunit 1	GO:0000922,GO:0001096,GO:0004721,GO:0005634,GO:0005654,GO:0005737,GO:0005813,GO:0005819,GO:0006366,GO:0006368,GO:0006470,GO:0008420,GO:0010458,GO:0016591,GO:0030496,GO:0030957,GO:0043231,GO:0043234,GO:0043923,GO:0050434,GO:0051233,GO:0051301,GO:0061052,GO:0070940	spindle pole|TFIIF-class transcription factor binding|phosphoprotein phosphatase activity|nucleus|nucleoplasm|cytoplasm|centrosome|spindle|transcription from RNA polymerase II promoter|transcription elongation from RNA polymerase II promoter|protein dephosphorylation|CTD phosphatase activity|exit from mitosis|DNA-directed RNA polymerase II, holoenzyme|midbody|Tat protein binding|intracellular mem…
hsa-miR-1180-3p	NM_052865.3	165	-31.22	165	-31.22	44209	22	2372	404	MGME1	GeneID:92667,Genbank:XM_017028128.1,HGNC:HGNC:16205,MIM:615076	mitochondrial genome maintenance exonuclease 1	GO:0000002,GO:0003677,GO:0005739,GO:0006264,GO:0008297,GO:0043504	mitochondrial genome maintenance|DNA binding|mitochondrion|mitochondrial DNA replication|single-stranded DNA exodeoxyribonuclease activity|mitochondrial DNA repair
hsa-miR-1180-3p	NM_058243.2	157	-30.16	157	-30.16	44454	22	5198	3656	BRD4	GeneID:23476,Genbank:XM_011527854.2,HGNC:HGNC:13575,MIM:608749	bromodomain containing 4
hsa-miR-1180-3p	NM_130854.2	157	-31.84	157	-31.84	44788	22	7233	2110	PTPRS	GeneID:5802,Genbank:XM_017027066.1,HGNC:HGNC:9681,MIM:601576	protein tyrosine phosphatase, receptor type S	GO:0004721,GO:0004725,GO:0005886,GO:0005887,GO:0006470,GO:0007155,GO:0008201,GO:0010977,GO:0021510,GO:0021549,GO:0021766,GO:0021987,GO:0022038,GO:0030054,GO:0030285,GO:0030424,GO:0030517,GO:0032687,GO:0032688,GO:0034164,GO:0035335,GO:0035374,GO:0043204,GO:0043395,GO:0048671,GO:0048681,GO:0061000,GO:0070062,GO:0090557,GO:0099061	phosphoprotein phosphatase activity|protein tyrosine phosphatase activity|plasma membrane|integral component of plasma membrane|protein dephosphorylation|cell adhesion|heparin binding|negative regulation of neuron projection development|spinal cord development|cerebellum development|hippocampus development|cerebral cortex development|corpus callosum development|cell junction|integral component of…
hsa-miR-1180-3p	NM_133476.4	163	-33.52	163	-33.52	44884	22	3141	909	ZNF384	GeneID:171017,Genbank:NM_001039920.2,HGNC:HGNC:11955,MIM:609951	zinc finger protein 384
hsa-miR-1180-3p	NM_133491.4	171	-30.34	171	-30.34	44892	22	1004	517	SAT2	GeneID:112483,Genbank:XM_017024074.1,HGNC:HGNC:23160,MIM:611463	spermidine/spermine N1-acetyltransferase family member 2	GO:0004145,GO:0005737,GO:0009447,GO:0032918,GO:0032919,GO:0032920,GO:0042802,GO:0046204,GO:0070062	diamine N-acetyltransferase activity|cytoplasm|putrescine catabolic process|spermidine acetylation|spermine acetylation|putrescine acetylation|identical protein binding|nor-spermidine metabolic process|extracellular exosome	path:hsa00330,path:hsa04216	Arginine and proline metabolism|Ferroptosis
hsa-miR-1180-3p	NM_138783.3	166	-38.77	166	-38.77	45214	22	2255	2068	ZNF653	GeneID:115950,Genbank:NM_138783.3,HGNC:HGNC:25196,MIM:611371	zinc finger protein 653	GO:0003677,GO:0003714,GO:0005576,GO:0005634,GO:0006351,GO:0006355,GO:0008134,GO:0046872,GO:0048019,GO:0050682,GO:1900116,GO:1903507	DNA binding|transcription corepressor activity|extracellular region|nucleus|transcription, DNA-templated|regulation of transcription, DNA-templated|transcription factor binding|metal ion binding|receptor antagonist activity|AF-2 domain binding|extracellular negative regulation of signal transduction|negative regulation of nucleic acid-templated transcription
hsa-miR-1180-3p	NM_147134.3	167	-30.82	167	-30.82	45939	22	3656	65	NFX1	GeneID:4799,Genbank:NM_001318758.1,HGNC:HGNC:7803,MIM:603255	nuclear transcription factor, X-box binding 1	GO:0000122,GO:0000977,GO:0001078,GO:0003700,GO:0003723,GO:0005634,GO:0005730,GO:0005829,GO:0005886,GO:0006366,GO:0006954,GO:0008270,GO:0016032,GO:0016874,GO:0045347	negative regulation of transcription from RNA polymerase II promoter|RNA polymerase II regulatory region sequence-specific DNA binding|transcriptional repressor activity, RNA polymerase II proximal promoter sequence-specific DNA binding|DNA binding transcription factor activity|RNA binding|nucleus|nucleolus|cytosol|plasma membrane|transcription from RNA polymerase II promoter|inflammatory respons…	path:hsa05165	Human papillomavirus infection
hsa-miR-1180-3p	NM_152569.2	166	-32.53	166	-32.53	46322	22	2786	1264	C9orf66	GeneID:157983,Genbank:NM_152569.2,HGNC:HGNC:26436	chromosome 9 open reading frame 66
hsa-miR-1180-3p	NM_152745.2	162	-33.39	162	-33.39	46458	22	2931	57	NXPH1	GeneID:30010,Genbank:NM_152745.2,HGNC:HGNC:20693,MIM:604639	neurexophilin 1	GO:0005102,GO:0005576	receptor binding|extracellular region
hsa-miR-1180-3p	NM_152905.3	166	-30.92	166	-30.92	46545	22	3977	7	NEDD1	GeneID:121441,Genbank:XM_017018801.2,HGNC:HGNC:7723,MIM:600372	neural precursor cell expressed, developmentally down-regulated 1	GO:0000086,GO:0000242,GO:0000922,GO:0005813,GO:0005814,GO:0005829,GO:0010389,GO:0036064,GO:0045177,GO:0051301,GO:0071539,GO:0097711	G2/M transition of mitotic cell cycle|pericentriolar material|spindle pole|centrosome|centriole|cytosol|regulation of G2/M transition of mitotic cell cycle|ciliary basal body|apical part of cell|cell division|protein localization to centrosome|ciliary basal body-plasma membrane docking
hsa-miR-1180-3p	NM_153358.2	174	-35.82	174	-35.82	46705	22	2495	142	ZNF791	GeneID:163049,Genbank:NM_153358.2,HGNC:HGNC:26895	zinc finger protein 791	GO:0003677,GO:0005634,GO:0006351,GO:0006355,GO:0046872	DNA binding|nucleus|transcription, DNA-templated|regulation of transcription, DNA-templated|metal ion binding
hsa-miR-1180-3p	NM_153373.3	161	-32.52	161	-32.52	46719	22	2098	61	PHYKPL	GeneID:85007,Genbank:NM_153373.3,HGNC:HGNC:28249,MIM:614683	5-phosphohydroxy-L-lysine phospho-lyase	GO:0005739,GO:0005759,GO:0006554,GO:0008453,GO:0016829,GO:0030170,GO:0030574,GO:0042802	mitochondrion|mitochondrial matrix|lysine catabolic process|alanine-glyoxylate transaminase activity|lyase activity|pyridoxal phosphate binding|collagen catabolic process|identical protein binding	path:hsa00310	Lysine degradation
hsa-miR-1180-3p	NM_172101.3	162	-31.09	162	-31.09	46984	22	1125	365	CD8B	GeneID:926,Genbank:NM_001178100.1,HGNC:HGNC:1707,MIM:186730	CD8b molecule			path:hsa04514,path:hsa04612,path:hsa04640,path:hsa04660,path:hsa05340	Cell adhesion molecules (CAMs)|Antigen processing and presentation|Hematopoietic cell lineage|T cell receptor signaling pathway|Primary immunodeficiency
hsa-miR-1180-3p	NM_172102.3	162	-31.09	162	-31.09	46985	22	981	365	CD8B	GeneID:926,Genbank:NM_001178100.1,HGNC:HGNC:1707,MIM:186730	CD8b molecule			path:hsa04514,path:hsa04612,path:hsa04640,path:hsa04660,path:hsa05340	Cell adhesion molecules (CAMs)|Antigen processing and presentation|Hematopoietic cell lineage|T cell receptor signaling pathway|Primary immunodeficiency
hsa-miR-1180-3p	NM_172213.3	162	-31.09	162	-31.09	47030	22	1071	365	CD8B	GeneID:926,Genbank:NM_001178100.1,HGNC:HGNC:1707,MIM:186730	CD8b molecule			path:hsa04514,path:hsa04612,path:hsa04640,path:hsa04660,path:hsa05340	Cell adhesion molecules (CAMs)|Antigen processing and presentation|Hematopoietic cell lineage|T cell receptor signaling pathway|Primary immunodeficiency
hsa-miR-1180-3p	NM_173828.4	170	-31.37	170	-31.37	47367	22	2599	738	RELL2	GeneID:285613,Genbank:NM_173828.4,HGNC:HGNC:26902,MIM:611213	RELT like 2	GO:0005518,GO:0005604,GO:0005886,GO:0010811,GO:0016021	collagen binding|basement membrane|plasma membrane|positive regulation of cell-substrate adhesion|integral component of membrane
hsa-miR-1180-3p	NM_174920.3	166	-35.08	166	-35.08	47432	22	3316	980	SAMD14	GeneID:201191,Genbank:NM_001257359.1,HGNC:HGNC:27312	sterile alpha motif domain containing 14
hsa-miR-1180-3p	NM_175848.1	157	-30.58	157	-30.58	47563	22	4293	1860	DNMT3B	GeneID:1789,Genbank:NM_006892.3,HGNC:HGNC:2979,MIM:602900	DNA methyltransferase 3 beta			path:hsa00270,path:hsa05206	Cysteine and methionine metabolism|MicroRNAs in cancer
hsa-miR-1180-3p	NM_175849.1	157	-30.58	157	-30.58	47564	22	4104	1860	DNMT3B	GeneID:1789,Genbank:NM_006892.3,HGNC:HGNC:2979,MIM:602900	DNA methyltransferase 3 beta			path:hsa00270,path:hsa05206	Cysteine and methionine metabolism|MicroRNAs in cancer
hsa-miR-1180-3p	NM_175850.2	157	-30.58	157	-30.58	47565	22	4272	1839	DNMT3B	GeneID:1789,Genbank:NM_006892.3,HGNC:HGNC:2979,MIM:602900	DNA methyltransferase 3 beta			path:hsa00270,path:hsa05206	Cysteine and methionine metabolism|MicroRNAs in cancer
hsa-miR-1180-3p	NM_175932.2	157	-30.09	157	-30.09	47606	22	1763	140	PSMD13	GeneID:5719,Genbank:NM_002817.3,HGNC:HGNC:9558,MIM:603481	proteasome 26S subunit, non-ATPase 13	GO:0000165,GO:0000209,GO:0000502,GO:0002223,GO:0002479,GO:0005198,GO:0005576,GO:0005634,GO:0005654,GO:0005829,GO:0005838,GO:0006511,GO:0006521,GO:0007127,GO:0008541,GO:0010972,GO:0016020,GO:0016579,GO:0022624,GO:0031145,GO:0031146,GO:0033209,GO:0034774,GO:0038061,GO:0038095,GO:0043161,GO:0043248,GO:0043312,GO:0043488,GO:0043687,GO:0050852,GO:0051436,GO:0051437,GO:0055085,GO:0060071,GO:0061418,GO:…	MAPK cascade|protein polyubiquitination|proteasome complex|stimulatory C-type lectin receptor signaling pathway|antigen processing and presentation of exogenous peptide antigen via MHC class I, TAP-dependent|structural molecule activity|extracellular region|nucleus|nucleoplasm|cytosol|proteasome regulatory particle|ubiquitin-dependent protein catabolic process|regulation of cellular amino acid me…	path:hsa03050,path:hsa05169	Proteasome|Epstein-Barr virus infection
hsa-miR-1180-3p	NM_178328.1	173	-33.01	173	-33.01	47835	22	1786	1266	CCR3	GeneID:1232,Genbank:XM_017005686.1,HGNC:HGNC:1604,MIM:601268	C-C motif chemokine receptor 3			path:hsa04060,path:hsa04062,path:hsa05163,path:hsa05167,path:hsa05203	Cytokine-cytokine receptor interaction|Chemokine signaling pathway|Human cytomegalovirus infection|Kaposi sarcoma-associated herpesvirus infection|Viral carcinogenesis
hsa-miR-1180-3p	NM_178329.2	173	-33.01	173	-33.01	47836	22	1717	1197	CCR3	GeneID:1232,Genbank:XM_017005686.1,HGNC:HGNC:1604,MIM:601268	C-C motif chemokine receptor 3			path:hsa04060,path:hsa04062,path:hsa05163,path:hsa05167,path:hsa05203	Cytokine-cytokine receptor interaction|Chemokine signaling pathway|Human cytomegalovirus infection|Kaposi sarcoma-associated herpesvirus infection|Viral carcinogenesis
hsa-miR-1180-3p	NM_178549.3	170	-32.88	170	-32.88	47919	22	8565	183	ZNF678	GeneID:339500,Genbank:NM_178549.3,HGNC:HGNC:28652	zinc finger protein 678	GO:0003677,GO:0003700,GO:0005634,GO:0006351,GO:0006355,GO:0046872	DNA binding|DNA binding transcription factor activity|nucleus|transcription, DNA-templated|regulation of transcription, DNA-templated|metal ion binding
hsa-miR-1180-3p	NM_178557.3	157	-31.66	157	-31.66	47925	22	5894	669	NAT8L	GeneID:339983,Genbank:NM_178557.3,HGNC:HGNC:26742,MIM:610647	N-acetyltransferase 8 like	GO:0005737,GO:0005739,GO:0005759,GO:0008652,GO:0016021,GO:0017188,GO:0030867,GO:0031966	cytoplasm|mitochondrion|mitochondrial matrix|cellular amino acid biosynthetic process|integral component of membrane|aspartate N-acetyltransferase activity|rough endoplasmic reticulum membrane|mitochondrial membrane	path:hsa00250	Alanine, aspartate and glutamate metabolism
hsa-miR-1180-3p	NM_178820.4	168	-31.25	168	-31.25	47951	22	2376	155	FBXO27	GeneID:126433,Genbank:XM_017026290.1,HGNC:HGNC:18753,MIM:609099	F-box protein 27	GO:0000209,GO:0004842,GO:0005829,GO:0019005,GO:0043687	protein polyubiquitination|ubiquitin-protein transferase activity|cytosol|SCF ubiquitin ligase complex|post-translational protein modification
hsa-miR-1180-3p	NM_182556.3	180	-35.76	180	-35.76	48337	22	2307	1226	SLC25A45	GeneID:283130,Genbank:NM_001278251.2,HGNC:HGNC:27442,MIM:610825	solute carrier family 25 member 45	GO:0005743,GO:0006839,GO:0016021,GO:0022857	mitochondrial inner membrane|mitochondrial transport|integral component of membrane|transmembrane transporter activity
hsa-miR-1180-3p	NM_182958.2	166	-32.61	166	-32.61	48519	22	1840	155	KAT8	GeneID:84148,Genbank:NM_182958.2,HGNC:HGNC:17933,MIM:609912	lysine acetyltransferase 8	GO:0000123,GO:0000776,GO:0004402,GO:0005634,GO:0005654,GO:0006351,GO:0008134,GO:0010506,GO:0016407,GO:0016573,GO:0019899,GO:0030099,GO:0035064,GO:0043981,GO:0043982,GO:0043984,GO:0045892,GO:0045893,GO:0046872,GO:0071339,GO:0072487	histone acetyltransferase complex|kinetochore|histone acetyltransferase activity|nucleus|nucleoplasm|transcription, DNA-templated|transcription factor binding|regulation of autophagy|acetyltransferase activity|histone acetylation|enzyme binding|myeloid cell differentiation|methylated histone binding|histone H4-K5 acetylation|histone H4-K8 acetylation|histone H4-K16 acetylation|negative regulation…
hsa-miR-1180-3p	NM_182973.2	161	-30.09	161	-30.09	48530	22	3365	1869	TMPRSS9	GeneID:360200,Genbank:XM_011527978.2,HGNC:HGNC:30079,MIM:610477	transmembrane serine protease 9	GO:0004252,GO:0005887	serine-type endopeptidase activity|integral component of plasma membrane
hsa-miR-1180-3p	NM_183401.2	158	-31.92	158	-31.92	48611	22	4201	68	RNF14	GeneID:9604,Genbank:XM_024446265.1,HGNC:HGNC:10058,MIM:605675	ring finger protein 14	GO:0000151,GO:0000209,GO:0003713,GO:0005634,GO:0005737,GO:0005829,GO:0006351,GO:0006355,GO:0006357,GO:0007165,GO:0016567,GO:0019787,GO:0030521,GO:0031624,GO:0032436,GO:0042787,GO:0045893,GO:0046872,GO:0050681,GO:0060765,GO:0061630	ubiquitin ligase complex|protein polyubiquitination|transcription coactivator activity|nucleus|cytoplasm|cytosol|transcription, DNA-templated|regulation of transcription, DNA-templated|regulation of transcription from RNA polymerase II promoter|signal transduction|protein ubiquitination|ubiquitin-like protein transferase activity|androgen receptor signaling pathway|ubiquitin conjugating enzyme bi…
hsa-miR-1180-3p	NM_199350.3	155	-30.13	155	-30.13	49256	22	1624	373	C9orf50	GeneID:375759,Genbank:XM_011518662.2,HGNC:HGNC:23677	chromosome 9 open reading frame 50
hsa-miR-1180-3p	NM_203397.2	157	-33.88	157	-33.88	49516	22	1518	1028	MBLAC1	GeneID:255374,Genbank:NM_203397.2,HGNC:HGNC:22180	metallo-beta-lactamase domain containing 1	GO:0016787,GO:0046872	hydrolase activity|metal ion binding
hsa-miR-1180-3p	NM_207111.3	159	-30.44	159	-30.44	49724	22	5867	61	RNF216	GeneID:54476,Genbank:NM_207116.2,HGNC:HGNC:21698,MIM:609948	ring finger protein 216	GO:0005634,GO:0005654,GO:0005829,GO:0006915,GO:0016032,GO:0032480,GO:0032648,GO:0043161,GO:0046872,GO:0050691,GO:0061630,GO:0070936	nucleus|nucleoplasm|cytosol|apoptotic process|viral process|negative regulation of type I interferon production|regulation of interferon-beta production|proteasome-mediated ubiquitin-dependent protein catabolic process|metal ion binding|regulation of defense response to virus by host|ubiquitin protein ligase activity|protein K48-linked ubiquitination
hsa-miR-1180-3p	NM_207116.2	159	-30.44	159	-30.44	49727	22	5696	61	RNF216	GeneID:54476,Genbank:NM_207116.2,HGNC:HGNC:21698,MIM:609948	ring finger protein 216	GO:0005634,GO:0005654,GO:0005829,GO:0006915,GO:0016032,GO:0032480,GO:0032648,GO:0043161,GO:0046872,GO:0050691,GO:0061630,GO:0070936	nucleus|nucleoplasm|cytosol|apoptotic process|viral process|negative regulation of type I interferon production|regulation of interferon-beta production|proteasome-mediated ubiquitin-dependent protein catabolic process|metal ion binding|regulation of defense response to virus by host|ubiquitin protein ligase activity|protein K48-linked ubiquitination
hsa-miR-1180-3p	NM_207356.2	175	-38.26	175	-38.26	49799	22	1705	100	C1orf174	GeneID:339448,Genbank:NM_207356.2,HGNC:HGNC:27915	chromosome 1 open reading frame 174	GO:0005634	nucleus
hsa-miR-1180-3p	NM_207411.4	153	-30.21	153	-30.21	49836	22	4908	65	XKR5	GeneID:389610,Genbank:NM_207411.4,HGNC:HGNC:20782	XK related 5	GO:0016021	integral component of membrane
hsa-miR-1180-3p	XM_005244743.3	175	-38.26	175	-38.26	49988	22	1962	100	C1orf174	GeneID:339448,Genbank:NM_207356.2,HGNC:HGNC:27915	chromosome 1 open reading frame 174	GO:0005634	nucleus
hsa-miR-1180-3p	XM_005248567.1	166	-30.39	166	-30.39	51037	22	3464	1252	MCCC2	GeneID:64087,Genbank:NM_022132.4,HGNC:HGNC:6937,MIM:609014	methylcrotonoyl-CoA carboxylase 2	GO:0002169,GO:0004485,GO:0005524,GO:0005739,GO:0005759,GO:0005829,GO:0006552,GO:0006768,GO:0009083,GO:0015936,GO:0051291,GO:1905202	3-methylcrotonyl-CoA carboxylase complex, mitochondrial|methylcrotonoyl-CoA carboxylase activity|ATP binding|mitochondrion|mitochondrial matrix|cytosol|leucine catabolic process|biotin metabolic process|branched-chain amino acid catabolic process|coenzyme A metabolic process|protein heterooligomerization|methylcrotonoyl-CoA carboxylase complex	path:hsa00280	Valine, leucine and isoleucine degradation
hsa-miR-1180-3p	XM_005250250.3	157	-33.88	157	-33.88	51467	22	1542	1071	MBLAC1	GeneID:255374,Genbank:NM_203397.2,HGNC:HGNC:22180	metallo-beta-lactamase domain containing 1	GO:0016787,GO:0046872	hydrolase activity|metal ion binding
hsa-miR-1180-3p	XM_005252775.2	163	-34.74	163	-34.74	52058	22	3598	795	LRRC56	GeneID:115399,Genbank:XM_017017167.1,HGNC:HGNC:25430	leucine rich repeat containing 56
hsa-miR-1180-3p	XM_005252776.2	163	-34.74	163	-34.74	52059	22	3421	795	LRRC56	GeneID:115399,Genbank:XM_017017167.1,HGNC:HGNC:25430	leucine rich repeat containing 56
hsa-miR-1180-3p	XM_005255558.2	159	-31.3	159	-31.3	52656	22	2027	1259	ZNF205	GeneID:7755,Genbank:NM_003456.2,HGNC:HGNC:12996,MIM:603436	zinc finger protein 205	GO:0000122,GO:0000977,GO:0001227,GO:0005634,GO:0005739,GO:0006351,GO:0006355,GO:0008270,GO:0010729,GO:1901030	negative regulation of transcription from RNA polymerase II promoter|RNA polymerase II regulatory region sequence-specific DNA binding|transcriptional repressor activity, RNA polymerase II transcription regulatory region sequence-specific DNA binding|nucleus|mitochondrion|transcription, DNA-templated|regulation of transcription, DNA-templated|zinc ion binding|positive regulation of hydrogen perox…
hsa-miR-1180-3p	XM_005255633.5	164	-30.4	164	-30.4	52669	22	6832	6171	NUDT16L1	GeneID:84309,Genbank:XM_005255633.5,HGNC:HGNC:28154,MIM:617338	nudix hydrolase 16 like 1	GO:0003723,GO:0005634,GO:0016787,GO:0030515,GO:2001033	RNA binding|nucleus|hydrolase activity|snoRNA binding|negative regulation of double-strand break repair via nonhomologous end joining	path:hsa05205	Proteoglycans in cancer
hsa-miR-1180-3p	XM_005256301.3	155	-30.18	155	-30.18	52849	22	5255	7	GALNS	GeneID:2588,Genbank:NM_001323543.1,HGNC:HGNC:4122,MIM:612222	galactosamine (N-acetyl)-6-sulfatase	GO:0003943,GO:0005576,GO:0008484,GO:0035578,GO:0042340,GO:0043202,GO:0043312,GO:0043890,GO:0046872,GO:0070062	N-acetylgalactosamine-4-sulfatase activity|extracellular region|sulfuric ester hydrolase activity|azurophil granule lumen|keratan sulfate catabolic process|lysosomal lumen|neutrophil degranulation|N-acetylgalactosamine-6-sulfatase activity|metal ion binding|extracellular exosome	path:hsa00531,path:hsa04142	Glycosaminoglycan degradation|Lysosome
hsa-miR-1180-3p	XM_005256549.3	168	-33.87	168	-33.87	52900	22	6852	362	KDM6B	GeneID:23135,Genbank:XM_005256549.3,HGNC:HGNC:29012,MIM:611577	lysine demethylase 6B	GO:0002437,GO:0003682,GO:0005634,GO:0005654,GO:0006338,GO:0008013,GO:0014823,GO:0021766,GO:0032452,GO:0043565,GO:0045165,GO:0045446,GO:0045944,GO:0046872,GO:0048333,GO:0051213,GO:0055007,GO:0060992,GO:0070301,GO:0071557,GO:0071558	inflammatory response to antigenic stimulus|chromatin binding|nucleus|nucleoplasm|chromatin remodeling|beta-catenin binding|response to activity|hippocampus development|histone demethylase activity|sequence-specific DNA binding|cell fate commitment|endothelial cell differentiation|positive regulation of transcription from RNA polymerase II promoter|metal ion binding|mesodermal cell differentiatio…
hsa-miR-1180-3p	XM_005256550.4	168	-33.87	168	-33.87	52901	22	6694	204	KDM6B	GeneID:23135,Genbank:XM_005256549.3,HGNC:HGNC:29012,MIM:611577	lysine demethylase 6B	GO:0002437,GO:0003682,GO:0005634,GO:0005654,GO:0006338,GO:0008013,GO:0014823,GO:0021766,GO:0032452,GO:0043565,GO:0045165,GO:0045446,GO:0045944,GO:0046872,GO:0048333,GO:0051213,GO:0055007,GO:0060992,GO:0070301,GO:0071557,GO:0071558	inflammatory response to antigenic stimulus|chromatin binding|nucleus|nucleoplasm|chromatin remodeling|beta-catenin binding|response to activity|hippocampus development|histone demethylase activity|sequence-specific DNA binding|cell fate commitment|endothelial cell differentiation|positive regulation of transcription from RNA polymerase II promoter|metal ion binding|mesodermal cell differentiatio…
hsa-miR-1180-3p	XM_005256551.3	168	-33.87	168	-33.87	52902	22	6733	243	KDM6B	GeneID:23135,Genbank:XM_005256549.3,HGNC:HGNC:29012,MIM:611577	lysine demethylase 6B	GO:0002437,GO:0003682,GO:0005634,GO:0005654,GO:0006338,GO:0008013,GO:0014823,GO:0021766,GO:0032452,GO:0043565,GO:0045165,GO:0045446,GO:0045944,GO:0046872,GO:0048333,GO:0051213,GO:0055007,GO:0060992,GO:0070301,GO:0071557,GO:0071558	inflammatory response to antigenic stimulus|chromatin binding|nucleus|nucleoplasm|chromatin remodeling|beta-catenin binding|response to activity|hippocampus development|histone demethylase activity|sequence-specific DNA binding|cell fate commitment|endothelial cell differentiation|positive regulation of transcription from RNA polymerase II promoter|metal ion binding|mesodermal cell differentiatio…
hsa-miR-1180-3p	XM_005256552.5	168	-33.87	168	-33.87	52903	22	7713	1223	KDM6B	GeneID:23135,Genbank:XM_005256549.3,HGNC:HGNC:29012,MIM:611577	lysine demethylase 6B	GO:0002437,GO:0003682,GO:0005634,GO:0005654,GO:0006338,GO:0008013,GO:0014823,GO:0021766,GO:0032452,GO:0043565,GO:0045165,GO:0045446,GO:0045944,GO:0046872,GO:0048333,GO:0051213,GO:0055007,GO:0060992,GO:0070301,GO:0071557,GO:0071558	inflammatory response to antigenic stimulus|chromatin binding|nucleus|nucleoplasm|chromatin remodeling|beta-catenin binding|response to activity|hippocampus development|histone demethylase activity|sequence-specific DNA binding|cell fate commitment|endothelial cell differentiation|positive regulation of transcription from RNA polymerase II promoter|metal ion binding|mesodermal cell differentiatio…
hsa-miR-1180-3p	XM_005257669.3	162	-30.96	162	-30.96	53178	22	3966	700	RHBDF2	GeneID:79651,Genbank:XM_011525250.2,HGNC:HGNC:20788,MIM:614404	rhomboid 5 homolog 2	GO:0005789,GO:0005886,GO:0006508,GO:0015031,GO:0016021,GO:0019838,GO:0042058,GO:0050708,GO:0050709	endoplasmic reticulum membrane|plasma membrane|proteolysis|protein transport|integral component of membrane|growth factor binding|regulation of epidermal growth factor receptor signaling pathway|regulation of protein secretion|negative regulation of protein secretion
hsa-miR-1180-3p	XM_005257670.1	162	-30.96	162	-30.96	53179	22	3475	296	RHBDF2	GeneID:79651,Genbank:XM_011525250.2,HGNC:HGNC:20788,MIM:614404	rhomboid 5 homolog 2	GO:0005789,GO:0005886,GO:0006508,GO:0015031,GO:0016021,GO:0019838,GO:0042058,GO:0050708,GO:0050709	endoplasmic reticulum membrane|plasma membrane|proteolysis|protein transport|integral component of membrane|growth factor binding|regulation of epidermal growth factor receptor signaling pathway|regulation of protein secretion|negative regulation of protein secretion
hsa-miR-1180-3p	XM_005259174.5	164	-30.41	164	-30.41	53503	22	2569	1481	ZSCAN18	GeneID:65982,Genbank:XM_006723335.2,HGNC:HGNC:21037	zinc finger and SCAN domain containing 18	GO:0000981,GO:0003677,GO:0005634,GO:0006351,GO:0046872	RNA polymerase II transcription factor activity, sequence-specific DNA binding|DNA binding|nucleus|transcription, DNA-templated|metal ion binding
hsa-miR-1180-3p	XM_005259199.2	157	-30.15	157	-30.15	53508	22	2265	451	VASP	GeneID:7408,Genbank:NM_003370.3,HGNC:HGNC:12652,MIM:601703	vasodilator stimulated phosphoprotein	GO:0001843,GO:0003779,GO:0005522,GO:0005829,GO:0005886,GO:0005923,GO:0005925,GO:0007411,GO:0008154,GO:0015629,GO:0017124,GO:0030838,GO:0031258,GO:0031527,GO:0034329,GO:0045296,GO:0051289,GO:0070062	neural tube closure|actin binding|profilin binding|cytosol|plasma membrane|bicellular tight junction|focal adhesion|axon guidance|actin polymerization or depolymerization|actin cytoskeleton|SH3 domain binding|positive regulation of actin filament polymerization|lamellipodium membrane|filopodium membrane|cell junction assembly|cadherin binding|protein homotetramerization|extracellular exosome	path:hsa04015,path:hsa04022,path:hsa04510,path:hsa04530,path:hsa04611,path:hsa04666,path:hsa04670	Rap1 signaling pathway|cGMP-PKG signaling pathway|Focal adhesion|Tight junction|Platelet activation|Fc gamma R-mediated phagocytosis|Leukocyte transendothelial migration
hsa-miR-1180-3p	XM_005259200.2	157	-30.15	157	-30.15	53509	22	2265	451	VASP	GeneID:7408,Genbank:NM_003370.3,HGNC:HGNC:12652,MIM:601703	vasodilator stimulated phosphoprotein	GO:0001843,GO:0003779,GO:0005522,GO:0005829,GO:0005886,GO:0005923,GO:0005925,GO:0007411,GO:0008154,GO:0015629,GO:0017124,GO:0030838,GO:0031258,GO:0031527,GO:0034329,GO:0045296,GO:0051289,GO:0070062	neural tube closure|actin binding|profilin binding|cytosol|plasma membrane|bicellular tight junction|focal adhesion|axon guidance|actin polymerization or depolymerization|actin cytoskeleton|SH3 domain binding|positive regulation of actin filament polymerization|lamellipodium membrane|filopodium membrane|cell junction assembly|cadherin binding|protein homotetramerization|extracellular exosome	path:hsa04015,path:hsa04022,path:hsa04510,path:hsa04530,path:hsa04611,path:hsa04666,path:hsa04670	Rap1 signaling pathway|cGMP-PKG signaling pathway|Focal adhesion|Tight junction|Platelet activation|Fc gamma R-mediated phagocytosis|Leukocyte transendothelial migration
hsa-miR-1180-3p	XM_005259334.4	160	-31.58	160	-31.58	53544	22	2456	670	TEAD2	GeneID:8463,Genbank:NM_001256662.1,HGNC:HGNC:11715,MIM:601729	TEA domain transcription factor 2	GO:0001085,GO:0001134,GO:0001223,GO:0001570,GO:0001843,GO:0003143,GO:0003700,GO:0003705,GO:0005634,GO:0005654,GO:0005829,GO:0006355,GO:0006367,GO:0006461,GO:0030903,GO:0035329,GO:0043231,GO:0043565,GO:0044212,GO:0045893,GO:0045944,GO:0046982,GO:0048339,GO:0048368,GO:0048568,GO:0060548,GO:0071149,GO:0071300,GO:0097718,GO:2000736	RNA polymerase II transcription factor binding|transcription factor activity, transcription factor recruiting|transcription coactivator binding|vasculogenesis|neural tube closure|embryonic heart tube morphogenesis|DNA binding transcription factor activity|transcription factor activity, RNA polymerase II distal enhancer sequence-specific binding|nucleus|nucleoplasm|cytosol|regulation of transcript…	path:hsa04390,path:hsa04392	Hippo signaling pathway|Hippo signaling pathway - multiple species
hsa-miR-1180-3p	XM_005259475.2	158	-30.33	158	-30.33	53580	22	10035	4710	APC2	GeneID:10297,Genbank:XM_005259475.2,HGNC:HGNC:24036,MIM:612034	APC2, WNT signaling pathway regulator	GO:0000226,GO:0005737,GO:0005794,GO:0005829,GO:0005874,GO:0005884,GO:0008013,GO:0008017,GO:0015630,GO:0016055,GO:0016342,GO:0030496,GO:0031258,GO:0035414,GO:0045171,GO:0048471,GO:0090090,GO:0090630	microtubule cytoskeleton organization|cytoplasm|Golgi apparatus|cytosol|microtubule|actin filament|beta-catenin binding|microtubule binding|microtubule cytoskeleton|Wnt signaling pathway|catenin complex|midbody|lamellipodium membrane|negative regulation of catenin import into nucleus|intercellular bridge|perinuclear region of cytoplasm|negative regulation of canonical Wnt signaling pathway|activa…	path:hsa04310,path:hsa04390,path:hsa04550,path:hsa04810,path:hsa04934,path:hsa05165,path:hsa05166,path:hsa05200,path:hsa05206,path:hsa05210,path:hsa05213,path:hsa05217,path:hsa05224,path:hsa05225,path:hsa05226	Wnt signaling pathway|Hippo signaling pathway|Signaling pathways regulating pluripotency of stem cells|Regulation of actin cytoskeleton|Cushing syndrome|Human papillomavirus infection|Human T-cell leukemia virus 1 infection|Pathways in cancer|MicroRNAs in cancer|Colorectal cancer|Endometrial cancer|Basal cell carcinoma|Breast cancer|Hepatocellular carcinoma|Gastric cancer
hsa-miR-1180-3p	XM_005259600.2	157	-31.84	157	-31.84	53613	22	7281	2078	PTPRS	GeneID:5802,Genbank:XM_017027066.1,HGNC:HGNC:9681,MIM:601576	protein tyrosine phosphatase, receptor type S	GO:0004721,GO:0004725,GO:0005886,GO:0005887,GO:0006470,GO:0007155,GO:0008201,GO:0010977,GO:0021510,GO:0021549,GO:0021766,GO:0021987,GO:0022038,GO:0030054,GO:0030285,GO:0030424,GO:0030517,GO:0032687,GO:0032688,GO:0034164,GO:0035335,GO:0035374,GO:0043204,GO:0043395,GO:0048671,GO:0048681,GO:0061000,GO:0070062,GO:0090557,GO:0099061	phosphoprotein phosphatase activity|protein tyrosine phosphatase activity|plasma membrane|integral component of plasma membrane|protein dephosphorylation|cell adhesion|heparin binding|negative regulation of neuron projection development|spinal cord development|cerebellum development|hippocampus development|cerebral cortex development|corpus callosum development|cell junction|integral component of…
hsa-miR-1180-3p	XM_005259606.2	157	-31.84	157	-31.84	53614	22	7206	2078	PTPRS	GeneID:5802,Genbank:XM_017027066.1,HGNC:HGNC:9681,MIM:601576	protein tyrosine phosphatase, receptor type S	GO:0004721,GO:0004725,GO:0005886,GO:0005887,GO:0006470,GO:0007155,GO:0008201,GO:0010977,GO:0021510,GO:0021549,GO:0021766,GO:0021987,GO:0022038,GO:0030054,GO:0030285,GO:0030424,GO:0030517,GO:0032687,GO:0032688,GO:0034164,GO:0035335,GO:0035374,GO:0043204,GO:0043395,GO:0048671,GO:0048681,GO:0061000,GO:0070062,GO:0090557,GO:0099061	phosphoprotein phosphatase activity|protein tyrosine phosphatase activity|plasma membrane|integral component of plasma membrane|protein dephosphorylation|cell adhesion|heparin binding|negative regulation of neuron projection development|spinal cord development|cerebellum development|hippocampus development|cerebral cortex development|corpus callosum development|cell junction|integral component of…
hsa-miR-1180-3p	XM_005259607.2	157	-31.84	157	-31.84	53615	22	7194	2078	PTPRS	GeneID:5802,Genbank:XM_017027066.1,HGNC:HGNC:9681,MIM:601576	protein tyrosine phosphatase, receptor type S	GO:0004721,GO:0004725,GO:0005886,GO:0005887,GO:0006470,GO:0007155,GO:0008201,GO:0010977,GO:0021510,GO:0021549,GO:0021766,GO:0021987,GO:0022038,GO:0030054,GO:0030285,GO:0030424,GO:0030517,GO:0032687,GO:0032688,GO:0034164,GO:0035335,GO:0035374,GO:0043204,GO:0043395,GO:0048671,GO:0048681,GO:0061000,GO:0070062,GO:0090557,GO:0099061	phosphoprotein phosphatase activity|protein tyrosine phosphatase activity|plasma membrane|integral component of plasma membrane|protein dephosphorylation|cell adhesion|heparin binding|negative regulation of neuron projection development|spinal cord development|cerebellum development|hippocampus development|cerebral cortex development|corpus callosum development|cell junction|integral component of…
hsa-miR-1180-3p	XM_005259912.4	159	-31.71	159	-31.71	53685	22	4094	531	LYL1	GeneID:4066,Genbank:XM_005259912.4,HGNC:HGNC:6734,MIM:151440	LYL1, basic helix-loop-helix family member			path:hsa05202	Transcriptional misregulation in cancer
hsa-miR-1180-3p	XM_005260080.4	175	-35.3	175	-35.3	53722	22	3350	1155	COLGALT1	GeneID:79709,Genbank:NM_024656.3,HGNC:HGNC:26182,MIM:617531	collagen beta(1-O)galactosyltransferase 1	GO:0005788,GO:0016020,GO:0050211,GO:1904028	endoplasmic reticulum lumen|membrane|procollagen galactosyltransferase activity|positive regulation of collagen fibril organization	path:hsa00310,path:hsa00514	Lysine degradation|Other types of O-glycan biosynthesis
hsa-miR-1180-3p	XM_005260157.3	160	-33.93	160	-33.93	53736	22	2429	232	ARMC6	GeneID:93436,Genbank:NM_001199196.1,HGNC:HGNC:25049	armadillo repeat containing 6	GO:0002244,GO:0005829	hematopoietic progenitor cell differentiation|cytosol
hsa-miR-1180-3p	XM_005260763.3	165	-31.87	165	-31.87	53897	22	2188	89	APMAP	GeneID:57136,Genbank:XM_005260763.3,HGNC:HGNC:13238,MIM:615884	adipocyte plasma membrane associated protein	GO:0004064,GO:0005783,GO:0009058,GO:0009986,GO:0016020,GO:0016021,GO:0016844,GO:0070062	arylesterase activity|endoplasmic reticulum|biosynthetic process|cell surface|membrane|integral component of membrane|strictosidine synthase activity|extracellular exosome
hsa-miR-1180-3p	XM_005260867.3	165	-31.22	165	-31.22	53915	22	2370	371	MGME1	GeneID:92667,Genbank:XM_017028128.1,HGNC:HGNC:16205,MIM:615076	mitochondrial genome maintenance exonuclease 1	GO:0000002,GO:0003677,GO:0005739,GO:0006264,GO:0008297,GO:0043504	mitochondrial genome maintenance|DNA binding|mitochondrion|mitochondrial DNA replication|single-stranded DNA exodeoxyribonuclease activity|mitochondrial DNA repair
hsa-miR-1180-3p	XM_005260870.4	165	-31.22	165	-31.22	53916	22	2180	359	MGME1	GeneID:92667,Genbank:XM_017028128.1,HGNC:HGNC:16205,MIM:615076	mitochondrial genome maintenance exonuclease 1	GO:0000002,GO:0003677,GO:0005739,GO:0006264,GO:0008297,GO:0043504	mitochondrial genome maintenance|DNA binding|mitochondrion|mitochondrial DNA replication|single-stranded DNA exodeoxyribonuclease activity|mitochondrial DNA repair
hsa-miR-1180-3p	XM_005263824.4	171	-31.56	171	-31.56	54571	22	2029	1730	CHCHD5	GeneID:84269,Genbank:NM_032309.3,HGNC:HGNC:17840,MIM:616978	coiled-coil-helix-coiled-coil-helix domain containing 5	GO:0005758,GO:0009060	mitochondrial intermembrane space|aerobic respiration
hsa-miR-1180-3p	XM_005264231.4	162	-30.83	162	-30.83	54677	22	1585	633	FOSL2	GeneID:2355,Genbank:XM_006711976.3,HGNC:HGNC:3798,MIM:601575	FOS like 2, AP-1 transcription factor subunit	GO:0000977,GO:0001228,GO:0003334,GO:0003682,GO:0003700,GO:0005634,GO:0005654,GO:0006357,GO:0008219,GO:0045944,GO:0048146	RNA polymerase II regulatory region sequence-specific DNA binding|transcriptional activator activity, RNA polymerase II transcription regulatory region sequence-specific DNA binding|keratinocyte development|chromatin binding|DNA binding transcription factor activity|nucleus|nucleoplasm|regulation of transcription from RNA polymerase II promoter|cell death|positive regulation of transcription from…	path:hsa04380	Osteoclast differentiation
hsa-miR-1180-3p	XM_005267561.4	162	-30.96	162	-30.96	55487	22	3355	417	BRF1	GeneID:2972,Genbank:NM_001242787.1,HGNC:HGNC:11551,MIM:604902	BRF1, RNA polymerase III transcription initiation factor subunit	GO:0000126,GO:0001026,GO:0005654,GO:0006383,GO:0006384,GO:0009303,GO:0009304,GO:0017025,GO:0045945,GO:0046872,GO:0070897	transcription factor TFIIIB complex|TFIIIB-type transcription factor activity|nucleoplasm|transcription from RNA polymerase III promoter|transcription initiation from RNA polymerase III promoter|rRNA transcription|tRNA transcription|TBP-class protein binding|positive regulation of transcription from RNA polymerase III promoter|metal ion binding|DNA-templated transcriptional preinitiation complex …
hsa-miR-1180-3p	XM_005268414.4	170	-31.37	170	-31.37	55668	22	2498	727	RELL2	GeneID:285613,Genbank:NM_173828.4,HGNC:HGNC:26902,MIM:611213	RELT like 2	GO:0005518,GO:0005604,GO:0005886,GO:0010811,GO:0016021	collagen binding|basement membrane|plasma membrane|positive regulation of cell-substrate adhesion|integral component of membrane
hsa-miR-1180-3p	XM_005268539.3	158	-31.92	158	-31.92	55717	22	2902	30	RNF14	GeneID:9604,Genbank:XM_024446265.1,HGNC:HGNC:10058,MIM:605675	ring finger protein 14	GO:0000151,GO:0000209,GO:0003713,GO:0005634,GO:0005737,GO:0005829,GO:0006351,GO:0006355,GO:0006357,GO:0007165,GO:0016567,GO:0019787,GO:0030521,GO:0031624,GO:0032436,GO:0042787,GO:0045893,GO:0046872,GO:0050681,GO:0060765,GO:0061630	ubiquitin ligase complex|protein polyubiquitination|transcription coactivator activity|nucleus|cytoplasm|cytosol|transcription, DNA-templated|regulation of transcription, DNA-templated|regulation of transcription from RNA polymerase II promoter|signal transduction|protein ubiquitination|ubiquitin-like protein transferase activity|androgen receptor signaling pathway|ubiquitin conjugating enzyme bi…
hsa-miR-1180-3p	XM_005268962.3	163	-30.08	163	-30.08	55827	22	3357	13	PPHLN1	GeneID:51535,Genbank:XM_017019449.1,HGNC:HGNC:19369,MIM:608150	periphilin 1	GO:0003723,GO:0005654,GO:0005694,GO:0005794,GO:0005829,GO:0006351,GO:0031424,GO:0045892	RNA binding|nucleoplasm|chromosome|Golgi apparatus|cytosol|transcription, DNA-templated|keratinization|negative regulation of transcription, DNA-templated
hsa-miR-1180-3p	XM_005269241.5	161	-30.1	161	-30.1	55908	22	4208	1639	SART3	GeneID:9733,Genbank:NM_014706.3,HGNC:HGNC:16860,MIM:611684	squamous cell carcinoma antigen recognized by T cells 3	GO:0000244,GO:0000387,GO:0000398,GO:0000902,GO:0003723,GO:0005634,GO:0005654,GO:0005737,GO:0006334,GO:0010468,GO:0015030,GO:0016607,GO:0017070,GO:0030621,GO:0030624,GO:0042393,GO:0048872,GO:0071425,GO:1903586,GO:1990381	spliceosomal tri-snRNP complex assembly|spliceosomal snRNP assembly|mRNA splicing, via spliceosome|cell morphogenesis|RNA binding|nucleus|nucleoplasm|cytoplasm|nucleosome assembly|regulation of gene expression|Cajal body|nuclear speck|U6 snRNA binding|U4 snRNA binding|U6atac snRNA binding|histone binding|homeostasis of number of cells|hematopoietic stem cell proliferation|positive regulation of h…
hsa-miR-1180-3p	XM_005271172.3	158	-31.27	158	-31.27	56364	22	764	91	DNALI1	GeneID:7802,Genbank:NM_003462.3,HGNC:HGNC:14353,MIM:602135	dynein axonemal light intermediate chain 1	GO:0003774,GO:0005737,GO:0005930,GO:0030175,GO:0030286,GO:0045504	motor activity|cytoplasm|axoneme|filopodium|dynein complex|dynein heavy chain binding	path:hsa05016	Huntington disease
hsa-miR-1180-3p	XM_005273476.4	161	-34.22	161	-34.22	56867	22	8590	2036	ANK1	GeneID:286,Genbank:NM_001142446.1,HGNC:HGNC:492,MIM:612641	ankyrin 1			path:hsa05205	Proteoglycans in cancer
hsa-miR-1180-3p	XM_005273726.4	163	-37	163	-37	56928	22	2864	2441	SF3B2	GeneID:10992,Genbank:NM_006842.2,HGNC:HGNC:10769,MIM:605591	splicing factor 3b subunit 2	GO:0000398,GO:0003723,GO:0005654,GO:0005681,GO:0005684,GO:0005686,GO:0005689,GO:0006397,GO:0008380,GO:0016032,GO:0016607,GO:0071011,GO:0071013	mRNA splicing, via spliceosome|RNA binding|nucleoplasm|spliceosomal complex|U2-type spliceosomal complex|U2 snRNP|U12-type spliceosomal complex|mRNA processing|RNA splicing|viral process|nuclear speck|precatalytic spliceosome|catalytic step 2 spliceosome	path:hsa03040	Spliceosome
hsa-miR-1180-3p	XM_005274018.3	166	-32.56	166	-32.56	56983	22	2840	279	OVOL1	GeneID:5017,Genbank:NM_004561.3,HGNC:HGNC:8525,MIM:602313	ovo like transcriptional repressor 1	GO:0000978,GO:0000981,GO:0001078,GO:0001822,GO:0005634,GO:0006351,GO:0007283,GO:0007498,GO:0008544,GO:0043588,GO:0046872,GO:0051729,GO:1901994,GO:2000647	RNA polymerase II proximal promoter sequence-specific DNA binding|RNA polymerase II transcription factor activity, sequence-specific DNA binding|transcriptional repressor activity, RNA polymerase II proximal promoter sequence-specific DNA binding|kidney development|nucleus|transcription, DNA-templated|spermatogenesis|mesoderm development|epidermis development|skin development|metal ion binding|ge…
hsa-miR-1180-3p	XM_005274055.3	171	-30.42	171	-30.42	56997	22	1846	596	WDR74	GeneID:54663,Genbank:XM_024448586.1,HGNC:HGNC:25529	WD repeat domain 74	GO:0005634,GO:0005730,GO:0030687,GO:0042273	nucleus|nucleolus|preribosome, large subunit precursor|ribosomal large subunit biogenesis
hsa-miR-1180-3p	XM_006711019.3	172	-32.31	172	-32.31	57515	22	1598	603	TNFRSF14	GeneID:8764,Genbank:NM_003820.3,HGNC:HGNC:11912,MIM:602746	TNF receptor superfamily member 14			path:hsa04060,path:hsa05168	Cytokine-cytokine receptor interaction|Herpes simplex infection
hsa-miR-1180-3p	XM_006711779.3	168	-30.16	168	-30.16	57723	22	3170	1522	TRIM17	GeneID:51127,Genbank:XM_011544210.3,HGNC:HGNC:13430,MIM:606123	tripartite motif containing 17	GO:0004842,GO:0005622,GO:0006914,GO:0008270,GO:0030674,GO:0032880,GO:0051865	ubiquitin-protein transferase activity|intracellular|autophagy|zinc ion binding|protein binding, bridging|regulation of protein localization|protein autoubiquitination
hsa-miR-1180-3p	XM_006711951.4	161	-33.61	161	-33.61	57781	22	3719	1457	GAREM2	GeneID:150946,Genbank:NM_001168241.1,HGNC:HGNC:27172	GRB2 associated regulator of MAPK1 subtype 2	GO:0070062	extracellular exosome
hsa-miR-1180-3p	XM_006711976.3	162	-30.83	162	-30.83	57787	22	6762	633	FOSL2	GeneID:2355,Genbank:XM_006711976.3,HGNC:HGNC:3798,MIM:601575	FOS like 2, AP-1 transcription factor subunit	GO:0000977,GO:0001228,GO:0003334,GO:0003682,GO:0003700,GO:0005634,GO:0005654,GO:0006357,GO:0008219,GO:0045944,GO:0048146	RNA polymerase II regulatory region sequence-specific DNA binding|transcriptional activator activity, RNA polymerase II transcription regulatory region sequence-specific DNA binding|keratinocyte development|chromatin binding|DNA binding transcription factor activity|nucleus|nucleoplasm|regulation of transcription from RNA polymerase II promoter|cell death|positive regulation of transcription from…	path:hsa04380	Osteoclast differentiation
hsa-miR-1180-3p	XM_006712960.3	173	-33.01	173	-33.01	58134	22	1726	1303	CCR3	GeneID:1232,Genbank:XM_017005686.1,HGNC:HGNC:1604,MIM:601268	C-C motif chemokine receptor 3			path:hsa04060,path:hsa04062,path:hsa05163,path:hsa05167,path:hsa05203	Cytokine-cytokine receptor interaction|Chemokine signaling pathway|Human cytomegalovirus infection|Kaposi sarcoma-associated herpesvirus infection|Viral carcinogenesis
hsa-miR-1180-3p	XM_006714925.2	161	-32.52	161	-32.52	58720	22	1824	23	PHYKPL	GeneID:85007,Genbank:NM_153373.3,HGNC:HGNC:28249,MIM:614683	5-phosphohydroxy-L-lysine phospho-lyase	GO:0005739,GO:0005759,GO:0006554,GO:0008453,GO:0016829,GO:0030170,GO:0030574,GO:0042802	mitochondrion|mitochondrial matrix|lysine catabolic process|alanine-glyoxylate transaminase activity|lyase activity|pyridoxal phosphate binding|collagen catabolic process|identical protein binding	path:hsa00310	Lysine degradation
hsa-miR-1180-3p	XM_006715174.4	166	-40.39	166	-40.39	58799	22	1616	247	PPP1R11	GeneID:6992,Genbank:XM_006715174.4,HGNC:HGNC:9285,MIM:606670	protein phosphatase 1 regulatory inhibitor subunit 11	GO:0000164,GO:0004865,GO:0005634,GO:0005737,GO:0008157,GO:0032515,GO:0042787,GO:0050710,GO:0050830,GO:0061630	protein phosphatase type 1 complex|protein serine/threonine phosphatase inhibitor activity|nucleus|cytoplasm|protein phosphatase 1 binding|negative regulation of phosphoprotein phosphatase activity|protein ubiquitination involved in ubiquitin-dependent protein catabolic process|negative regulation of cytokine secretion|defense response to Gram-positive bacterium|ubiquitin protein ligase activity
hsa-miR-1180-3p	XM_006718132.2	163	-34.74	163	-34.74	59716	22	3673	795	LRRC56	GeneID:115399,Genbank:XM_017017167.1,HGNC:HGNC:25430	leucine rich repeat containing 56
hsa-miR-1180-3p	XM_006718940.4	165	-30.99	165	-30.99	59955	22	4128	2963	PCSK7	GeneID:9159,Genbank:XM_024448764.1,HGNC:HGNC:8748,MIM:604872	proprotein convertase subtilisin/kexin type 7	GO:0004252,GO:0008233,GO:0016485,GO:0016486,GO:0030173	serine-type endopeptidase activity|peptidase activity|protein processing|peptide hormone processing|integral component of Golgi membrane
hsa-miR-1180-3p	XM_006719186.4	172	-33.99	172	-33.99	60031	22	7299	736	PLXNC1	GeneID:10154,Genbank:NM_005761.2,HGNC:HGNC:9106,MIM:604259	plexin C1	GO:0005102,GO:0005886,GO:0007155,GO:0007162,GO:0008360,GO:0016020,GO:0016021,GO:0017154,GO:0043087,GO:0050772	receptor binding|plasma membrane|cell adhesion|negative regulation of cell adhesion|regulation of cell shape|membrane|integral component of membrane|semaphorin receptor activity|regulation of GTPase activity|positive regulation of axonogenesis	path:hsa04360	Axon guidance
hsa-miR-1180-3p	XM_006721483.3	168	-33.87	168	-33.87	60713	22	6797	307	KDM6B	GeneID:23135,Genbank:XM_005256549.3,HGNC:HGNC:29012,MIM:611577	lysine demethylase 6B	GO:0002437,GO:0003682,GO:0005634,GO:0005654,GO:0006338,GO:0008013,GO:0014823,GO:0021766,GO:0032452,GO:0043565,GO:0045165,GO:0045446,GO:0045944,GO:0046872,GO:0048333,GO:0051213,GO:0055007,GO:0060992,GO:0070301,GO:0071557,GO:0071558	inflammatory response to antigenic stimulus|chromatin binding|nucleus|nucleoplasm|chromatin remodeling|beta-catenin binding|response to activity|hippocampus development|histone demethylase activity|sequence-specific DNA binding|cell fate commitment|endothelial cell differentiation|positive regulation of transcription from RNA polymerase II promoter|metal ion binding|mesodermal cell differentiatio…
hsa-miR-1180-3p	XM_006722607.2	158	-30.33	158	-30.33	61055	22	10032	4707	APC2	GeneID:10297,Genbank:XM_005259475.2,HGNC:HGNC:24036,MIM:612034	APC2, WNT signaling pathway regulator	GO:0000226,GO:0005737,GO:0005794,GO:0005829,GO:0005874,GO:0005884,GO:0008013,GO:0008017,GO:0015630,GO:0016055,GO:0016342,GO:0030496,GO:0031258,GO:0035414,GO:0045171,GO:0048471,GO:0090090,GO:0090630	microtubule cytoskeleton organization|cytoplasm|Golgi apparatus|cytosol|microtubule|actin filament|beta-catenin binding|microtubule binding|microtubule cytoskeleton|Wnt signaling pathway|catenin complex|midbody|lamellipodium membrane|negative regulation of catenin import into nucleus|intercellular bridge|perinuclear region of cytoplasm|negative regulation of canonical Wnt signaling pathway|activa…	path:hsa04310,path:hsa04390,path:hsa04550,path:hsa04810,path:hsa04934,path:hsa05165,path:hsa05166,path:hsa05200,path:hsa05206,path:hsa05210,path:hsa05213,path:hsa05217,path:hsa05224,path:hsa05225,path:hsa05226	Wnt signaling pathway|Hippo signaling pathway|Signaling pathways regulating pluripotency of stem cells|Regulation of actin cytoskeleton|Cushing syndrome|Human papillomavirus infection|Human T-cell leukemia virus 1 infection|Pathways in cancer|MicroRNAs in cancer|Colorectal cancer|Endometrial cancer|Basal cell carcinoma|Breast cancer|Hepatocellular carcinoma|Gastric cancer
hsa-miR-1180-3p	XM_006722608.3	158	-30.33	158	-30.33	61056	22	10296	4971	APC2	GeneID:10297,Genbank:XM_005259475.2,HGNC:HGNC:24036,MIM:612034	APC2, WNT signaling pathway regulator	GO:0000226,GO:0005737,GO:0005794,GO:0005829,GO:0005874,GO:0005884,GO:0008013,GO:0008017,GO:0015630,GO:0016055,GO:0016342,GO:0030496,GO:0031258,GO:0035414,GO:0045171,GO:0048471,GO:0090090,GO:0090630	microtubule cytoskeleton organization|cytoplasm|Golgi apparatus|cytosol|microtubule|actin filament|beta-catenin binding|microtubule binding|microtubule cytoskeleton|Wnt signaling pathway|catenin complex|midbody|lamellipodium membrane|negative regulation of catenin import into nucleus|intercellular bridge|perinuclear region of cytoplasm|negative regulation of canonical Wnt signaling pathway|activa…	path:hsa04310,path:hsa04390,path:hsa04550,path:hsa04810,path:hsa04934,path:hsa05165,path:hsa05166,path:hsa05200,path:hsa05206,path:hsa05210,path:hsa05213,path:hsa05217,path:hsa05224,path:hsa05225,path:hsa05226	Wnt signaling pathway|Hippo signaling pathway|Signaling pathways regulating pluripotency of stem cells|Regulation of actin cytoskeleton|Cushing syndrome|Human papillomavirus infection|Human T-cell leukemia virus 1 infection|Pathways in cancer|MicroRNAs in cancer|Colorectal cancer|Endometrial cancer|Basal cell carcinoma|Breast cancer|Hepatocellular carcinoma|Gastric cancer
hsa-miR-1180-3p	XM_006722609.3	158	-30.33	158	-30.33	61057	22	10105	4780	APC2	GeneID:10297,Genbank:XM_005259475.2,HGNC:HGNC:24036,MIM:612034	APC2, WNT signaling pathway regulator	GO:0000226,GO:0005737,GO:0005794,GO:0005829,GO:0005874,GO:0005884,GO:0008013,GO:0008017,GO:0015630,GO:0016055,GO:0016342,GO:0030496,GO:0031258,GO:0035414,GO:0045171,GO:0048471,GO:0090090,GO:0090630	microtubule cytoskeleton organization|cytoplasm|Golgi apparatus|cytosol|microtubule|actin filament|beta-catenin binding|microtubule binding|microtubule cytoskeleton|Wnt signaling pathway|catenin complex|midbody|lamellipodium membrane|negative regulation of catenin import into nucleus|intercellular bridge|perinuclear region of cytoplasm|negative regulation of canonical Wnt signaling pathway|activa…	path:hsa04310,path:hsa04390,path:hsa04550,path:hsa04810,path:hsa04934,path:hsa05165,path:hsa05166,path:hsa05200,path:hsa05206,path:hsa05210,path:hsa05213,path:hsa05217,path:hsa05224,path:hsa05225,path:hsa05226	Wnt signaling pathway|Hippo signaling pathway|Signaling pathways regulating pluripotency of stem cells|Regulation of actin cytoskeleton|Cushing syndrome|Human papillomavirus infection|Human T-cell leukemia virus 1 infection|Pathways in cancer|MicroRNAs in cancer|Colorectal cancer|Endometrial cancer|Basal cell carcinoma|Breast cancer|Hepatocellular carcinoma|Gastric cancer
hsa-miR-1180-3p	XM_006722610.3	158	-30.33	158	-30.33	61058	22	10292	4967	APC2	GeneID:10297,Genbank:XM_005259475.2,HGNC:HGNC:24036,MIM:612034	APC2, WNT signaling pathway regulator	GO:0000226,GO:0005737,GO:0005794,GO:0005829,GO:0005874,GO:0005884,GO:0008013,GO:0008017,GO:0015630,GO:0016055,GO:0016342,GO:0030496,GO:0031258,GO:0035414,GO:0045171,GO:0048471,GO:0090090,GO:0090630	microtubule cytoskeleton organization|cytoplasm|Golgi apparatus|cytosol|microtubule|actin filament|beta-catenin binding|microtubule binding|microtubule cytoskeleton|Wnt signaling pathway|catenin complex|midbody|lamellipodium membrane|negative regulation of catenin import into nucleus|intercellular bridge|perinuclear region of cytoplasm|negative regulation of canonical Wnt signaling pathway|activa…	path:hsa04310,path:hsa04390,path:hsa04550,path:hsa04810,path:hsa04934,path:hsa05165,path:hsa05166,path:hsa05200,path:hsa05206,path:hsa05210,path:hsa05213,path:hsa05217,path:hsa05224,path:hsa05225,path:hsa05226	Wnt signaling pathway|Hippo signaling pathway|Signaling pathways regulating pluripotency of stem cells|Regulation of actin cytoskeleton|Cushing syndrome|Human papillomavirus infection|Human T-cell leukemia virus 1 infection|Pathways in cancer|MicroRNAs in cancer|Colorectal cancer|Endometrial cancer|Basal cell carcinoma|Breast cancer|Hepatocellular carcinoma|Gastric cancer
hsa-miR-1180-3p	XM_006722994.2	160	-31.11	160	-31.11	61176	22	3229	859	U2AF2	GeneID:11338,Genbank:NM_007279.2,HGNC:HGNC:23156,MIM:191318	U2 small nuclear RNA auxiliary factor 2	GO:0000243,GO:0000398,GO:0003723,GO:0005634,GO:0005654,GO:0005681,GO:0006369,GO:0006397,GO:0006405,GO:0006406,GO:0008187,GO:0016607,GO:0019899,GO:0030628,GO:0031124,GO:0031397,GO:0033120,GO:0048025,GO:0070742,GO:0071004,GO:0089701,GO:1903146,GO:1903955	commitment complex|mRNA splicing, via spliceosome|RNA binding|nucleus|nucleoplasm|spliceosomal complex|termination of RNA polymerase II transcription|mRNA processing|RNA export from nucleus|mRNA export from nucleus|poly-pyrimidine tract binding|nuclear speck|enzyme binding|pre-mRNA 3'-splice site binding|mRNA 3'-end processing|negative regulation of protein ubiquitination|positive regulation of R…	path:hsa03040	Spliceosome
hsa-miR-1180-3p	XM_006723335.2	164	-30.41	164	-30.41	61280	22	2634	1546	ZSCAN18	GeneID:65982,Genbank:XM_006723335.2,HGNC:HGNC:21037	zinc finger and SCAN domain containing 18	GO:0000981,GO:0003677,GO:0005634,GO:0006351,GO:0046872	RNA polymerase II transcription factor activity, sequence-specific DNA binding|DNA binding|nucleus|transcription, DNA-templated|metal ion binding
hsa-miR-1180-3p	XM_006723386.4	162	-34.16	162	-34.16	61299	22	6869	3425	MYH14	GeneID:79784,Genbank:XM_011527320.2,HGNC:HGNC:23212,MIM:608568	myosin heavy chain 14	GO:0000146,GO:0001725,GO:0003009,GO:0005516,GO:0005524,GO:0005829,GO:0005903,GO:0007519,GO:0007605,GO:0008360,GO:0016020,GO:0016460,GO:0016887,GO:0019228,GO:0030048,GO:0030424,GO:0030426,GO:0030898,GO:0031032,GO:0042641,GO:0043209,GO:0051015,GO:0070062,GO:0070584,GO:0071625,GO:0097513	microfilament motor activity|stress fiber|skeletal muscle contraction|calmodulin binding|ATP binding|cytosol|brush border|skeletal muscle tissue development|sensory perception of sound|regulation of cell shape|membrane|myosin II complex|ATPase activity|neuronal action potential|actin filament-based movement|axon|growth cone|actin-dependent ATPase activity|actomyosin structure organization|actomyo…	path:hsa04530,path:hsa04810,path:hsa05132	Tight junction|Regulation of actin cytoskeleton|Salmonella infection
hsa-miR-1180-3p	XM_006723428.3	160	-31.58	160	-31.58	61310	22	2525	670	TEAD2	GeneID:8463,Genbank:NM_001256662.1,HGNC:HGNC:11715,MIM:601729	TEA domain transcription factor 2	GO:0001085,GO:0001134,GO:0001223,GO:0001570,GO:0001843,GO:0003143,GO:0003700,GO:0003705,GO:0005634,GO:0005654,GO:0005829,GO:0006355,GO:0006367,GO:0006461,GO:0030903,GO:0035329,GO:0043231,GO:0043565,GO:0044212,GO:0045893,GO:0045944,GO:0046982,GO:0048339,GO:0048368,GO:0048568,GO:0060548,GO:0071149,GO:0071300,GO:0097718,GO:2000736	RNA polymerase II transcription factor binding|transcription factor activity, transcription factor recruiting|transcription coactivator binding|vasculogenesis|neural tube closure|embryonic heart tube morphogenesis|DNA binding transcription factor activity|transcription factor activity, RNA polymerase II distal enhancer sequence-specific binding|nucleus|nucleoplasm|cytosol|regulation of transcript…	path:hsa04390,path:hsa04392	Hippo signaling pathway|Hippo signaling pathway - multiple species
hsa-miR-1180-3p	XM_006723663.4	165	-31.22	165	-31.22	61372	22	2225	359	MGME1	GeneID:92667,Genbank:XM_017028128.1,HGNC:HGNC:16205,MIM:615076	mitochondrial genome maintenance exonuclease 1	GO:0000002,GO:0003677,GO:0005739,GO:0006264,GO:0008297,GO:0043504	mitochondrial genome maintenance|DNA binding|mitochondrion|mitochondrial DNA replication|single-stranded DNA exodeoxyribonuclease activity|mitochondrial DNA repair
hsa-miR-1180-3p	XM_011515476.2	165	-34.27	165	-34.27	65173	22	8499	961	TNS3	GeneID:64759,Genbank:XM_011515477.2,HGNC:HGNC:21616,MIM:606825	tensin 3	GO:0005829,GO:0005925,GO:0008284,GO:0016477,GO:0048286	cytosol|focal adhesion|positive regulation of cell proliferation|cell migration|lung alveolus development
hsa-miR-1180-3p	XM_011518655.1	155	-30.13	155	-30.13	66752	22	2175	928	C9orf50	GeneID:375759,Genbank:XM_011518662.2,HGNC:HGNC:23677	chromosome 9 open reading frame 50
hsa-miR-1180-3p	XM_011518656.1	155	-30.13	155	-30.13	66753	22	1685	438	C9orf50	GeneID:375759,Genbank:XM_011518662.2,HGNC:HGNC:23677	chromosome 9 open reading frame 50
hsa-miR-1180-3p	XM_011518780.3	160	-30.14	160	-30.14	66815	22	1702	10	C9orf78	GeneID:51759,Genbank:NM_016520.2,HGNC:HGNC:24932	chromosome 9 open reading frame 78	GO:0005654,GO:0005829	nucleoplasm|cytosol
hsa-miR-1180-3p	XM_011519461.2	167	-34.3	167	-34.3	67223	22	1549	1335	IL15RA	GeneID:3601,Genbank:XM_011519471.2,HGNC:HGNC:5978,MIM:601070	interleukin 15 receptor subunit alpha			path:hsa04060,path:hsa04630,path:hsa04672,path:hsa05166,path:hsa05200	Cytokine-cytokine receptor interaction|Jak-STAT signaling pathway|Intestinal immune network for IgA production|Human T-cell leukemia virus 1 infection|Pathways in cancer
hsa-miR-1180-3p	XM_011519462.2	167	-34.3	167	-34.3	67224	22	1467	1253	IL15RA	GeneID:3601,Genbank:XM_011519471.2,HGNC:HGNC:5978,MIM:601070	interleukin 15 receptor subunit alpha			path:hsa04060,path:hsa04630,path:hsa04672,path:hsa05166,path:hsa05200	Cytokine-cytokine receptor interaction|Jak-STAT signaling pathway|Intestinal immune network for IgA production|Human T-cell leukemia virus 1 infection|Pathways in cancer
hsa-miR-1180-3p	XM_011519463.2	167	-34.3	167	-34.3	67225	22	1450	1236	IL15RA	GeneID:3601,Genbank:XM_011519471.2,HGNC:HGNC:5978,MIM:601070	interleukin 15 receptor subunit alpha			path:hsa04060,path:hsa04630,path:hsa04672,path:hsa05166,path:hsa05200	Cytokine-cytokine receptor interaction|Jak-STAT signaling pathway|Intestinal immune network for IgA production|Human T-cell leukemia virus 1 infection|Pathways in cancer
hsa-miR-1180-3p	XM_011519464.2	167	-34.3	167	-34.3	67226	22	1396	1182	IL15RA	GeneID:3601,Genbank:XM_011519471.2,HGNC:HGNC:5978,MIM:601070	interleukin 15 receptor subunit alpha			path:hsa04060,path:hsa04630,path:hsa04672,path:hsa05166,path:hsa05200	Cytokine-cytokine receptor interaction|Jak-STAT signaling pathway|Intestinal immune network for IgA production|Human T-cell leukemia virus 1 infection|Pathways in cancer
hsa-miR-1180-3p	XM_011519467.2	167	-34.3	167	-34.3	67229	22	1312	1098	IL15RA	GeneID:3601,Genbank:XM_011519471.2,HGNC:HGNC:5978,MIM:601070	interleukin 15 receptor subunit alpha			path:hsa04060,path:hsa04630,path:hsa04672,path:hsa05166,path:hsa05200	Cytokine-cytokine receptor interaction|Jak-STAT signaling pathway|Intestinal immune network for IgA production|Human T-cell leukemia virus 1 infection|Pathways in cancer
hsa-miR-1180-3p	XM_011519468.1	167	-34.3	167	-34.3	67230	22	1448	1412	IL15RA	GeneID:3601,Genbank:XM_011519471.2,HGNC:HGNC:5978,MIM:601070	interleukin 15 receptor subunit alpha			path:hsa04060,path:hsa04630,path:hsa04672,path:hsa05166,path:hsa05200	Cytokine-cytokine receptor interaction|Jak-STAT signaling pathway|Intestinal immune network for IgA production|Human T-cell leukemia virus 1 infection|Pathways in cancer
hsa-miR-1180-3p	XM_011519470.2	167	-34.3	167	-34.3	67232	22	1215	1001	IL15RA	GeneID:3601,Genbank:XM_011519471.2,HGNC:HGNC:5978,MIM:601070	interleukin 15 receptor subunit alpha			path:hsa04060,path:hsa04630,path:hsa04672,path:hsa05166,path:hsa05200	Cytokine-cytokine receptor interaction|Jak-STAT signaling pathway|Intestinal immune network for IgA production|Human T-cell leukemia virus 1 infection|Pathways in cancer
hsa-miR-1180-3p	XM_011519471.2	167	-34.3	167	-34.3	67233	22	1280	1066	IL15RA	GeneID:3601,Genbank:XM_011519471.2,HGNC:HGNC:5978,MIM:601070	interleukin 15 receptor subunit alpha			path:hsa04060,path:hsa04630,path:hsa04672,path:hsa05166,path:hsa05200	Cytokine-cytokine receptor interaction|Jak-STAT signaling pathway|Intestinal immune network for IgA production|Human T-cell leukemia virus 1 infection|Pathways in cancer
hsa-miR-1180-3p	XM_011519472.2	167	-34.3	167	-34.3	67234	22	1119	905	IL15RA	GeneID:3601,Genbank:XM_011519471.2,HGNC:HGNC:5978,MIM:601070	interleukin 15 receptor subunit alpha			path:hsa04060,path:hsa04630,path:hsa04672,path:hsa05166,path:hsa05200	Cytokine-cytokine receptor interaction|Jak-STAT signaling pathway|Intestinal immune network for IgA production|Human T-cell leukemia virus 1 infection|Pathways in cancer
hsa-miR-1180-3p	XM_011519474.2	167	-34.3	167	-34.3	67235	22	1102	888	IL15RA	GeneID:3601,Genbank:XM_011519471.2,HGNC:HGNC:5978,MIM:601070	interleukin 15 receptor subunit alpha			path:hsa04060,path:hsa04630,path:hsa04672,path:hsa05166,path:hsa05200	Cytokine-cytokine receptor interaction|Jak-STAT signaling pathway|Intestinal immune network for IgA production|Human T-cell leukemia virus 1 infection|Pathways in cancer
hsa-miR-1180-3p	XM_011519475.2	167	-34.3	167	-34.3	67236	22	1020	806	IL15RA	GeneID:3601,Genbank:XM_011519471.2,HGNC:HGNC:5978,MIM:601070	interleukin 15 receptor subunit alpha			path:hsa04060,path:hsa04630,path:hsa04672,path:hsa05166,path:hsa05200	Cytokine-cytokine receptor interaction|Jak-STAT signaling pathway|Intestinal immune network for IgA production|Human T-cell leukemia virus 1 infection|Pathways in cancer
hsa-miR-1180-3p	XM_011519876.1	163	-34.74	163	-34.74	67418	22	3669	795	LRRC56	GeneID:115399,Genbank:XM_017017167.1,HGNC:HGNC:25430	leucine rich repeat containing 56
hsa-miR-1180-3p	XM_011520917.2	163	-33.52	163	-33.52	67943	22	3640	1142	ZNF384	GeneID:171017,Genbank:NM_001039920.2,HGNC:HGNC:11955,MIM:609951	zinc finger protein 384
hsa-miR-1180-3p	XM_011520918.1	163	-33.52	163	-33.52	67944	22	3334	836	ZNF384	GeneID:171017,Genbank:NM_001039920.2,HGNC:HGNC:11955,MIM:609951	zinc finger protein 384
hsa-miR-1180-3p	XM_011520919.2	163	-33.52	163	-33.52	67945	22	3370	872	ZNF384	GeneID:171017,Genbank:NM_001039920.2,HGNC:HGNC:11955,MIM:609951	zinc finger protein 384
hsa-miR-1180-3p	XM_011520920.1	163	-33.52	163	-33.52	67946	22	3359	861	ZNF384	GeneID:171017,Genbank:NM_001039920.2,HGNC:HGNC:11955,MIM:609951	zinc finger protein 384
hsa-miR-1180-3p	XM_011520921.2	163	-33.52	163	-33.52	67947	22	3184	686	ZNF384	GeneID:171017,Genbank:NM_001039920.2,HGNC:HGNC:11955,MIM:609951	zinc finger protein 384
hsa-miR-1180-3p	XM_011520922.1	163	-33.52	163	-33.52	67948	22	3286	788	ZNF384	GeneID:171017,Genbank:NM_001039920.2,HGNC:HGNC:11955,MIM:609951	zinc finger protein 384
hsa-miR-1180-3p	XM_011520923.1	163	-33.52	163	-33.52	67949	22	3311	813	ZNF384	GeneID:171017,Genbank:NM_001039920.2,HGNC:HGNC:11955,MIM:609951	zinc finger protein 384
hsa-miR-1180-3p	XM_011523399.2	167	-32.04	167	-32.04	69310	22	17416	1418	NKD1	GeneID:85407,Genbank:NM_033119.4,HGNC:HGNC:17045,MIM:607851	naked cuticle homolog 1	GO:0001754,GO:0005509,GO:0005737,GO:0005886,GO:0007525,GO:0016055,GO:0030165,GO:0045732,GO:0090090,GO:0090249,GO:1901231,GO:1901233,GO:2000096	eye photoreceptor cell differentiation|calcium ion binding|cytoplasm|plasma membrane|somatic muscle development|Wnt signaling pathway|PDZ domain binding|positive regulation of protein catabolic process|negative regulation of canonical Wnt signaling pathway|regulation of cell motility involved in somitogenic axis elongation|positive regulation of non-canonical Wnt signaling pathway via JNK cascade…	path:hsa04310,path:hsa04390	Wnt signaling pathway|Hippo signaling pathway
hsa-miR-1180-3p	XM_011523400.2	167	-32.04	167	-32.04	69311	22	16707	709	NKD1	GeneID:85407,Genbank:NM_033119.4,HGNC:HGNC:17045,MIM:607851	naked cuticle homolog 1	GO:0001754,GO:0005509,GO:0005737,GO:0005886,GO:0007525,GO:0016055,GO:0030165,GO:0045732,GO:0090090,GO:0090249,GO:1901231,GO:1901233,GO:2000096	eye photoreceptor cell differentiation|calcium ion binding|cytoplasm|plasma membrane|somatic muscle development|Wnt signaling pathway|PDZ domain binding|positive regulation of protein catabolic process|negative regulation of canonical Wnt signaling pathway|regulation of cell motility involved in somitogenic axis elongation|positive regulation of non-canonical Wnt signaling pathway via JNK cascade…	path:hsa04310,path:hsa04390	Wnt signaling pathway|Hippo signaling pathway
hsa-miR-1180-3p	XM_011523469.2	160	-31.13	160	-31.13	69351	22	3709	2006	CCDC102A	GeneID:92922,Genbank:XM_011523469.2,HGNC:HGNC:28097	coiled-coil domain containing 102A	GO:0003774,GO:0016459	motor activity|myosin complex
hsa-miR-1180-3p	XM_011523750.2	168	-33.87	168	-33.87	69489	22	8057	1567	KDM6B	GeneID:23135,Genbank:XM_005256549.3,HGNC:HGNC:29012,MIM:611577	lysine demethylase 6B	GO:0002437,GO:0003682,GO:0005634,GO:0005654,GO:0006338,GO:0008013,GO:0014823,GO:0021766,GO:0032452,GO:0043565,GO:0045165,GO:0045446,GO:0045944,GO:0046872,GO:0048333,GO:0051213,GO:0055007,GO:0060992,GO:0070301,GO:0071557,GO:0071558	inflammatory response to antigenic stimulus|chromatin binding|nucleus|nucleoplasm|chromatin remodeling|beta-catenin binding|response to activity|hippocampus development|histone demethylase activity|sequence-specific DNA binding|cell fate commitment|endothelial cell differentiation|positive regulation of transcription from RNA polymerase II promoter|metal ion binding|mesodermal cell differentiatio…
hsa-miR-1180-3p	XM_011523752.3	168	-33.87	168	-33.87	69490	22	6698	208	KDM6B	GeneID:23135,Genbank:XM_005256549.3,HGNC:HGNC:29012,MIM:611577	lysine demethylase 6B	GO:0002437,GO:0003682,GO:0005634,GO:0005654,GO:0006338,GO:0008013,GO:0014823,GO:0021766,GO:0032452,GO:0043565,GO:0045165,GO:0045446,GO:0045944,GO:0046872,GO:0048333,GO:0051213,GO:0055007,GO:0060992,GO:0070301,GO:0071557,GO:0071558	inflammatory response to antigenic stimulus|chromatin binding|nucleus|nucleoplasm|chromatin remodeling|beta-catenin binding|response to activity|hippocampus development|histone demethylase activity|sequence-specific DNA binding|cell fate commitment|endothelial cell differentiation|positive regulation of transcription from RNA polymerase II promoter|metal ion binding|mesodermal cell differentiatio…
hsa-miR-1180-3p	XM_011523845.3	162	-30.22	162	-30.22	69534	22	2955	549	LRRC75A	GeneID:388341,Genbank:NM_207387.3,HGNC:HGNC:32403	leucine rich repeat containing 75A
hsa-miR-1180-3p	XM_011524340.2	163	-30.98	163	-30.98	69812	22	2647	1341	CNP	GeneID:1267,Genbank:NM_033133.4,HGNC:HGNC:2158,MIM:123830	2',3'-cyclic nucleotide 3' phosphodiesterase	GO:0000226,GO:0003723,GO:0004113,GO:0005615,GO:0005634,GO:0005654,GO:0005737,GO:0005741,GO:0005743,GO:0005829,GO:0005874,GO:0005886,GO:0005902,GO:0007268,GO:0007409,GO:0007568,GO:0008344,GO:0009214,GO:0009636,GO:0016020,GO:0021762,GO:0030551,GO:0030900,GO:0031143,GO:0032496,GO:0035748,GO:0035749,GO:0042470,GO:0046902,GO:0048471,GO:0048709,GO:0070062	microtubule cytoskeleton organization|RNA binding|2',3'-cyclic-nucleotide 3'-phosphodiesterase activity|extracellular space|nucleus|nucleoplasm|cytoplasm|mitochondrial outer membrane|mitochondrial inner membrane|cytosol|microtubule|plasma membrane|microvillus|chemical synaptic transmission|axonogenesis|aging|adult locomotory behavior|cyclic nucleotide catabolic process|response to toxic substance…
hsa-miR-1180-3p	XM_011524490.3	166	-35.08	166	-35.08	69884	22	2403	167	SAMD14	GeneID:201191,Genbank:NM_001257359.1,HGNC:HGNC:27312	sterile alpha motif domain containing 14
hsa-miR-1180-3p	XM_011524926.3	162	-31.24	162	-31.24	70103	22	5746	8	MBTD1	GeneID:54799,Genbank:XM_011524928.2,HGNC:HGNC:19866	mbt domain containing 1	GO:0005634,GO:0006351,GO:0006355,GO:0008270,GO:0016569,GO:0035064,GO:0048706	nucleus|transcription, DNA-templated|regulation of transcription, DNA-templated|zinc ion binding|covalent chromatin modification|methylated histone binding|embryonic skeletal system development
hsa-miR-1180-3p	XM_011524928.2	162	-31.24	162	-31.24	70104	22	5682	8	MBTD1	GeneID:54799,Genbank:XM_011524928.2,HGNC:HGNC:19866	mbt domain containing 1	GO:0005634,GO:0006351,GO:0006355,GO:0008270,GO:0016569,GO:0035064,GO:0048706	nucleus|transcription, DNA-templated|regulation of transcription, DNA-templated|zinc ion binding|covalent chromatin modification|methylated histone binding|embryonic skeletal system development
hsa-miR-1180-3p	XM_011525249.2	162	-30.96	162	-30.96	70287	22	4922	1743	RHBDF2	GeneID:79651,Genbank:XM_011525250.2,HGNC:HGNC:20788,MIM:614404	rhomboid 5 homolog 2	GO:0005789,GO:0005886,GO:0006508,GO:0015031,GO:0016021,GO:0019838,GO:0042058,GO:0050708,GO:0050709	endoplasmic reticulum membrane|plasma membrane|proteolysis|protein transport|integral component of membrane|growth factor binding|regulation of epidermal growth factor receptor signaling pathway|regulation of protein secretion|negative regulation of protein secretion
hsa-miR-1180-3p	XM_011525250.2	162	-30.96	162	-30.96	70288	22	3632	453	RHBDF2	GeneID:79651,Genbank:XM_011525250.2,HGNC:HGNC:20788,MIM:614404	rhomboid 5 homolog 2	GO:0005789,GO:0005886,GO:0006508,GO:0015031,GO:0016021,GO:0019838,GO:0042058,GO:0050708,GO:0050709	endoplasmic reticulum membrane|plasma membrane|proteolysis|protein transport|integral component of membrane|growth factor binding|regulation of epidermal growth factor receptor signaling pathway|regulation of protein secretion|negative regulation of protein secretion
hsa-miR-1180-3p	XM_011525251.2	162	-30.96	162	-30.96	70289	22	3449	270	RHBDF2	GeneID:79651,Genbank:XM_011525250.2,HGNC:HGNC:20788,MIM:614404	rhomboid 5 homolog 2	GO:0005789,GO:0005886,GO:0006508,GO:0015031,GO:0016021,GO:0019838,GO:0042058,GO:0050708,GO:0050709	endoplasmic reticulum membrane|plasma membrane|proteolysis|protein transport|integral component of membrane|growth factor binding|regulation of epidermal growth factor receptor signaling pathway|regulation of protein secretion|negative regulation of protein secretion
hsa-miR-1180-3p	XM_011525381.2	169	-30.82	169	-30.82	70356	22	3013	1835	PPP1R9B	GeneID:84687,Genbank:NM_032595.4,HGNC:HGNC:9298,MIM:603325	protein phosphatase 1 regulatory subunit 9B
hsa-miR-1180-3p	XM_011526261.1	167	-37.26	167	-37.26	70787	22	3398	346	CTDP1	GeneID:9150,Genbank:NM_004715.4,HGNC:HGNC:2498,MIM:604927	CTD phosphatase subunit 1	GO:0000922,GO:0001096,GO:0004721,GO:0005634,GO:0005654,GO:0005737,GO:0005813,GO:0005819,GO:0006366,GO:0006368,GO:0006470,GO:0008420,GO:0010458,GO:0016591,GO:0030496,GO:0030957,GO:0043231,GO:0043234,GO:0043923,GO:0050434,GO:0051233,GO:0051301,GO:0061052,GO:0070940	spindle pole|TFIIF-class transcription factor binding|phosphoprotein phosphatase activity|nucleus|nucleoplasm|cytoplasm|centrosome|spindle|transcription from RNA polymerase II promoter|transcription elongation from RNA polymerase II promoter|protein dephosphorylation|CTD phosphatase activity|exit from mitosis|DNA-directed RNA polymerase II, holoenzyme|midbody|Tat protein binding|intracellular mem…
hsa-miR-1180-3p	XM_011526410.1	160	-31.11	160	-31.11	70866	22	3169	859	U2AF2	GeneID:11338,Genbank:NM_007279.2,HGNC:HGNC:23156,MIM:191318	U2 small nuclear RNA auxiliary factor 2	GO:0000243,GO:0000398,GO:0003723,GO:0005634,GO:0005654,GO:0005681,GO:0006369,GO:0006397,GO:0006405,GO:0006406,GO:0008187,GO:0016607,GO:0019899,GO:0030628,GO:0031124,GO:0031397,GO:0033120,GO:0048025,GO:0070742,GO:0071004,GO:0089701,GO:1903146,GO:1903955	commitment complex|mRNA splicing, via spliceosome|RNA binding|nucleus|nucleoplasm|spliceosomal complex|termination of RNA polymerase II transcription|mRNA processing|RNA export from nucleus|mRNA export from nucleus|poly-pyrimidine tract binding|nuclear speck|enzyme binding|pre-mRNA 3'-splice site binding|mRNA 3'-end processing|negative regulation of protein ubiquitination|positive regulation of R…	path:hsa03040	Spliceosome
hsa-miR-1180-3p	XM_011527237.2	164	-30.41	164	-30.41	71308	22	2564	1498	ZSCAN18	GeneID:65982,Genbank:XM_006723335.2,HGNC:HGNC:21037	zinc finger and SCAN domain containing 18	GO:0000981,GO:0003677,GO:0005634,GO:0006351,GO:0046872	RNA polymerase II transcription factor activity, sequence-specific DNA binding|DNA binding|nucleus|transcription, DNA-templated|metal ion binding
hsa-miR-1180-3p	XM_011527238.1	164	-30.41	164	-30.41	71309	22	2788	1700	ZSCAN18	GeneID:65982,Genbank:XM_006723335.2,HGNC:HGNC:21037	zinc finger and SCAN domain containing 18	GO:0000981,GO:0003677,GO:0005634,GO:0006351,GO:0046872	RNA polymerase II transcription factor activity, sequence-specific DNA binding|DNA binding|nucleus|transcription, DNA-templated|metal ion binding
hsa-miR-1180-3p	XM_011527239.3	164	-30.41	164	-30.41	71310	22	2729	1641	ZSCAN18	GeneID:65982,Genbank:XM_006723335.2,HGNC:HGNC:21037	zinc finger and SCAN domain containing 18	GO:0000981,GO:0003677,GO:0005634,GO:0006351,GO:0046872	RNA polymerase II transcription factor activity, sequence-specific DNA binding|DNA binding|nucleus|transcription, DNA-templated|metal ion binding
hsa-miR-1180-3p	XM_011527320.2	162	-34.16	162	-34.16	71358	22	6887	3443	MYH14	GeneID:79784,Genbank:XM_011527320.2,HGNC:HGNC:23212,MIM:608568	myosin heavy chain 14	GO:0000146,GO:0001725,GO:0003009,GO:0005516,GO:0005524,GO:0005829,GO:0005903,GO:0007519,GO:0007605,GO:0008360,GO:0016020,GO:0016460,GO:0016887,GO:0019228,GO:0030048,GO:0030424,GO:0030426,GO:0030898,GO:0031032,GO:0042641,GO:0043209,GO:0051015,GO:0070062,GO:0070584,GO:0071625,GO:0097513	microfilament motor activity|stress fiber|skeletal muscle contraction|calmodulin binding|ATP binding|cytosol|brush border|skeletal muscle tissue development|sensory perception of sound|regulation of cell shape|membrane|myosin II complex|ATPase activity|neuronal action potential|actin filament-based movement|axon|growth cone|actin-dependent ATPase activity|actomyosin structure organization|actomyo…	path:hsa04530,path:hsa04810,path:hsa05132	Tight junction|Regulation of actin cytoskeleton|Salmonella infection
hsa-miR-1180-3p	XM_011527321.2	162	-34.16	162	-34.16	71359	22	6863	3419	MYH14	GeneID:79784,Genbank:XM_011527320.2,HGNC:HGNC:23212,MIM:608568	myosin heavy chain 14	GO:0000146,GO:0001725,GO:0003009,GO:0005516,GO:0005524,GO:0005829,GO:0005903,GO:0007519,GO:0007605,GO:0008360,GO:0016020,GO:0016460,GO:0016887,GO:0019228,GO:0030048,GO:0030424,GO:0030426,GO:0030898,GO:0031032,GO:0042641,GO:0043209,GO:0051015,GO:0070062,GO:0070584,GO:0071625,GO:0097513	microfilament motor activity|stress fiber|skeletal muscle contraction|calmodulin binding|ATP binding|cytosol|brush border|skeletal muscle tissue development|sensory perception of sound|regulation of cell shape|membrane|myosin II complex|ATPase activity|neuronal action potential|actin filament-based movement|axon|growth cone|actin-dependent ATPase activity|actomyosin structure organization|actomyo…	path:hsa04530,path:hsa04810,path:hsa05132	Tight junction|Regulation of actin cytoskeleton|Salmonella infection
hsa-miR-1180-3p	XM_011527323.2	162	-34.16	162	-34.16	71360	22	6877	3433	MYH14	GeneID:79784,Genbank:XM_011527320.2,HGNC:HGNC:23212,MIM:608568	myosin heavy chain 14	GO:0000146,GO:0001725,GO:0003009,GO:0005516,GO:0005524,GO:0005829,GO:0005903,GO:0007519,GO:0007605,GO:0008360,GO:0016020,GO:0016460,GO:0016887,GO:0019228,GO:0030048,GO:0030424,GO:0030426,GO:0030898,GO:0031032,GO:0042641,GO:0043209,GO:0051015,GO:0070062,GO:0070584,GO:0071625,GO:0097513	microfilament motor activity|stress fiber|skeletal muscle contraction|calmodulin binding|ATP binding|cytosol|brush border|skeletal muscle tissue development|sensory perception of sound|regulation of cell shape|membrane|myosin II complex|ATPase activity|neuronal action potential|actin filament-based movement|axon|growth cone|actin-dependent ATPase activity|actomyosin structure organization|actomyo…	path:hsa04530,path:hsa04810,path:hsa05132	Tight junction|Regulation of actin cytoskeleton|Salmonella infection
hsa-miR-1180-3p	XM_011527399.2	160	-31.58	160	-31.58	71410	22	2180	265	TEAD2	GeneID:8463,Genbank:NM_001256662.1,HGNC:HGNC:11715,MIM:601729	TEA domain transcription factor 2	GO:0001085,GO:0001134,GO:0001223,GO:0001570,GO:0001843,GO:0003143,GO:0003700,GO:0003705,GO:0005634,GO:0005654,GO:0005829,GO:0006355,GO:0006367,GO:0006461,GO:0030903,GO:0035329,GO:0043231,GO:0043565,GO:0044212,GO:0045893,GO:0045944,GO:0046982,GO:0048339,GO:0048368,GO:0048568,GO:0060548,GO:0071149,GO:0071300,GO:0097718,GO:2000736	RNA polymerase II transcription factor binding|transcription factor activity, transcription factor recruiting|transcription coactivator binding|vasculogenesis|neural tube closure|embryonic heart tube morphogenesis|DNA binding transcription factor activity|transcription factor activity, RNA polymerase II distal enhancer sequence-specific binding|nucleus|nucleoplasm|cytosol|regulation of transcript…	path:hsa04390,path:hsa04392	Hippo signaling pathway|Hippo signaling pathway - multiple species
hsa-miR-1180-3p	XM_011527400.2	160	-31.58	160	-31.58	71411	22	2150	235	TEAD2	GeneID:8463,Genbank:NM_001256662.1,HGNC:HGNC:11715,MIM:601729	TEA domain transcription factor 2	GO:0001085,GO:0001134,GO:0001223,GO:0001570,GO:0001843,GO:0003143,GO:0003700,GO:0003705,GO:0005634,GO:0005654,GO:0005829,GO:0006355,GO:0006367,GO:0006461,GO:0030903,GO:0035329,GO:0043231,GO:0043565,GO:0044212,GO:0045893,GO:0045944,GO:0046982,GO:0048339,GO:0048368,GO:0048568,GO:0060548,GO:0071149,GO:0071300,GO:0097718,GO:2000736	RNA polymerase II transcription factor binding|transcription factor activity, transcription factor recruiting|transcription coactivator binding|vasculogenesis|neural tube closure|embryonic heart tube morphogenesis|DNA binding transcription factor activity|transcription factor activity, RNA polymerase II distal enhancer sequence-specific binding|nucleus|nucleoplasm|cytosol|regulation of transcript…	path:hsa04390,path:hsa04392	Hippo signaling pathway|Hippo signaling pathway - multiple species
hsa-miR-1180-3p	XM_011527401.1	160	-31.58	160	-31.58	71412	22	2123	208	TEAD2	GeneID:8463,Genbank:NM_001256662.1,HGNC:HGNC:11715,MIM:601729	TEA domain transcription factor 2	GO:0001085,GO:0001134,GO:0001223,GO:0001570,GO:0001843,GO:0003143,GO:0003700,GO:0003705,GO:0005634,GO:0005654,GO:0005829,GO:0006355,GO:0006367,GO:0006461,GO:0030903,GO:0035329,GO:0043231,GO:0043565,GO:0044212,GO:0045893,GO:0045944,GO:0046982,GO:0048339,GO:0048368,GO:0048568,GO:0060548,GO:0071149,GO:0071300,GO:0097718,GO:2000736	RNA polymerase II transcription factor binding|transcription factor activity, transcription factor recruiting|transcription coactivator binding|vasculogenesis|neural tube closure|embryonic heart tube morphogenesis|DNA binding transcription factor activity|transcription factor activity, RNA polymerase II distal enhancer sequence-specific binding|nucleus|nucleoplasm|cytosol|regulation of transcript…	path:hsa04390,path:hsa04392	Hippo signaling pathway|Hippo signaling pathway - multiple species
hsa-miR-1180-3p	XM_011527402.2	160	-31.58	160	-31.58	71413	22	2125	210	TEAD2	GeneID:8463,Genbank:NM_001256662.1,HGNC:HGNC:11715,MIM:601729	TEA domain transcription factor 2	GO:0001085,GO:0001134,GO:0001223,GO:0001570,GO:0001843,GO:0003143,GO:0003700,GO:0003705,GO:0005634,GO:0005654,GO:0005829,GO:0006355,GO:0006367,GO:0006461,GO:0030903,GO:0035329,GO:0043231,GO:0043565,GO:0044212,GO:0045893,GO:0045944,GO:0046982,GO:0048339,GO:0048368,GO:0048568,GO:0060548,GO:0071149,GO:0071300,GO:0097718,GO:2000736	RNA polymerase II transcription factor binding|transcription factor activity, transcription factor recruiting|transcription coactivator binding|vasculogenesis|neural tube closure|embryonic heart tube morphogenesis|DNA binding transcription factor activity|transcription factor activity, RNA polymerase II distal enhancer sequence-specific binding|nucleus|nucleoplasm|cytosol|regulation of transcript…	path:hsa04390,path:hsa04392	Hippo signaling pathway|Hippo signaling pathway - multiple species
hsa-miR-1180-3p	XM_011527403.1	160	-31.58	160	-31.58	71414	22	2149	246	TEAD2	GeneID:8463,Genbank:NM_001256662.1,HGNC:HGNC:11715,MIM:601729	TEA domain transcription factor 2	GO:0001085,GO:0001134,GO:0001223,GO:0001570,GO:0001843,GO:0003143,GO:0003700,GO:0003705,GO:0005634,GO:0005654,GO:0005829,GO:0006355,GO:0006367,GO:0006461,GO:0030903,GO:0035329,GO:0043231,GO:0043565,GO:0044212,GO:0045893,GO:0045944,GO:0046982,GO:0048339,GO:0048368,GO:0048568,GO:0060548,GO:0071149,GO:0071300,GO:0097718,GO:2000736	RNA polymerase II transcription factor binding|transcription factor activity, transcription factor recruiting|transcription coactivator binding|vasculogenesis|neural tube closure|embryonic heart tube morphogenesis|DNA binding transcription factor activity|transcription factor activity, RNA polymerase II distal enhancer sequence-specific binding|nucleus|nucleoplasm|cytosol|regulation of transcript…	path:hsa04390,path:hsa04392	Hippo signaling pathway|Hippo signaling pathway - multiple species
hsa-miR-1180-3p	XM_011527404.2	160	-31.58	160	-31.58	71415	22	2547	671	TEAD2	GeneID:8463,Genbank:NM_001256662.1,HGNC:HGNC:11715,MIM:601729	TEA domain transcription factor 2	GO:0001085,GO:0001134,GO:0001223,GO:0001570,GO:0001843,GO:0003143,GO:0003700,GO:0003705,GO:0005634,GO:0005654,GO:0005829,GO:0006355,GO:0006367,GO:0006461,GO:0030903,GO:0035329,GO:0043231,GO:0043565,GO:0044212,GO:0045893,GO:0045944,GO:0046982,GO:0048339,GO:0048368,GO:0048568,GO:0060548,GO:0071149,GO:0071300,GO:0097718,GO:2000736	RNA polymerase II transcription factor binding|transcription factor activity, transcription factor recruiting|transcription coactivator binding|vasculogenesis|neural tube closure|embryonic heart tube morphogenesis|DNA binding transcription factor activity|transcription factor activity, RNA polymerase II distal enhancer sequence-specific binding|nucleus|nucleoplasm|cytosol|regulation of transcript…	path:hsa04390,path:hsa04392	Hippo signaling pathway|Hippo signaling pathway - multiple species
hsa-miR-1180-3p	XM_011527405.3	160	-31.58	160	-31.58	71416	22	1301	674	TEAD2	GeneID:8463,Genbank:NM_001256662.1,HGNC:HGNC:11715,MIM:601729	TEA domain transcription factor 2	GO:0001085,GO:0001134,GO:0001223,GO:0001570,GO:0001843,GO:0003143,GO:0003700,GO:0003705,GO:0005634,GO:0005654,GO:0005829,GO:0006355,GO:0006367,GO:0006461,GO:0030903,GO:0035329,GO:0043231,GO:0043565,GO:0044212,GO:0045893,GO:0045944,GO:0046982,GO:0048339,GO:0048368,GO:0048568,GO:0060548,GO:0071149,GO:0071300,GO:0097718,GO:2000736	RNA polymerase II transcription factor binding|transcription factor activity, transcription factor recruiting|transcription coactivator binding|vasculogenesis|neural tube closure|embryonic heart tube morphogenesis|DNA binding transcription factor activity|transcription factor activity, RNA polymerase II distal enhancer sequence-specific binding|nucleus|nucleoplasm|cytosol|regulation of transcript…	path:hsa04390,path:hsa04392	Hippo signaling pathway|Hippo signaling pathway - multiple species
hsa-miR-1180-3p	XM_011527406.3	160	-31.58	160	-31.58	71417	22	1291	673	TEAD2	GeneID:8463,Genbank:NM_001256662.1,HGNC:HGNC:11715,MIM:601729	TEA domain transcription factor 2	GO:0001085,GO:0001134,GO:0001223,GO:0001570,GO:0001843,GO:0003143,GO:0003700,GO:0003705,GO:0005634,GO:0005654,GO:0005829,GO:0006355,GO:0006367,GO:0006461,GO:0030903,GO:0035329,GO:0043231,GO:0043565,GO:0044212,GO:0045893,GO:0045944,GO:0046982,GO:0048339,GO:0048368,GO:0048568,GO:0060548,GO:0071149,GO:0071300,GO:0097718,GO:2000736	RNA polymerase II transcription factor binding|transcription factor activity, transcription factor recruiting|transcription coactivator binding|vasculogenesis|neural tube closure|embryonic heart tube morphogenesis|DNA binding transcription factor activity|transcription factor activity, RNA polymerase II distal enhancer sequence-specific binding|nucleus|nucleoplasm|cytosol|regulation of transcript…	path:hsa04390,path:hsa04392	Hippo signaling pathway|Hippo signaling pathway - multiple species
hsa-miR-1180-3p	XM_011527804.3	173	-36.28	173	-36.28	71603	22	4891	1094	SBNO2	GeneID:22904,Genbank:NM_014963.2,HGNC:HGNC:29158,MIM:615729	strawberry notch homolog 2
hsa-miR-1180-3p	XM_011527854.2	157	-30.16	157	-30.16	71639	22	5701	3505	BRD4	GeneID:23476,Genbank:XM_011527854.2,HGNC:HGNC:13575,MIM:608749	bromodomain containing 4
hsa-miR-1180-3p	XM_011527978.2	161	-30.09	161	-30.09	71732	22	3716	2217	TMPRSS9	GeneID:360200,Genbank:XM_011527978.2,HGNC:HGNC:30079,MIM:610477	transmembrane serine protease 9	GO:0004252,GO:0005887	serine-type endopeptidase activity|integral component of plasma membrane
hsa-miR-1180-3p	XM_011527980.1	161	-30.09	161	-30.09	71733	22	2372	873	TMPRSS9	GeneID:360200,Genbank:XM_011527978.2,HGNC:HGNC:30079,MIM:610477	transmembrane serine protease 9	GO:0004252,GO:0005887	serine-type endopeptidase activity|integral component of plasma membrane
hsa-miR-1180-3p	XM_011527982.3	161	-30.09	161	-30.09	71734	22	2158	659	TMPRSS9	GeneID:360200,Genbank:XM_011527978.2,HGNC:HGNC:30079,MIM:610477	transmembrane serine protease 9	GO:0004252,GO:0005887	serine-type endopeptidase activity|integral component of plasma membrane
hsa-miR-1180-3p	XM_011528121.1	165	-32.09	165	-32.09	71806	22	2302	1149	C19orf66	GeneID:55337,Genbank:NM_018381.3,HGNC:HGNC:25649,MIM:616808	chromosome 19 open reading frame 66	GO:0003723,GO:0005634,GO:0005654,GO:0005737,GO:0005829,GO:0034340,GO:0034341,GO:0034342,GO:0045071,GO:0051607	RNA binding|nucleus|nucleoplasm|cytoplasm|cytosol|response to type I interferon|response to interferon-gamma|response to type III interferon|negative regulation of viral genome replication|defense response to virus
hsa-miR-1180-3p	XM_011528297.2	175	-35.3	175	-35.3	71914	22	3342	1147	COLGALT1	GeneID:79709,Genbank:NM_024656.3,HGNC:HGNC:26182,MIM:617531	collagen beta(1-O)galactosyltransferase 1	GO:0005788,GO:0016020,GO:0050211,GO:1904028	endoplasmic reticulum lumen|membrane|procollagen galactosyltransferase activity|positive regulation of collagen fibril organization	path:hsa00310,path:hsa00514	Lysine degradation|Other types of O-glycan biosynthesis
hsa-miR-1180-3p	XM_011528298.2	175	-35.3	175	-35.3	71915	22	3443	1248	COLGALT1	GeneID:79709,Genbank:NM_024656.3,HGNC:HGNC:26182,MIM:617531	collagen beta(1-O)galactosyltransferase 1	GO:0005788,GO:0016020,GO:0050211,GO:1904028	endoplasmic reticulum lumen|membrane|procollagen galactosyltransferase activity|positive regulation of collagen fibril organization	path:hsa00310,path:hsa00514	Lysine degradation|Other types of O-glycan biosynthesis
hsa-miR-1180-3p	XM_011528299.3	175	-35.3	175	-35.3	71916	22	3298	1103	COLGALT1	GeneID:79709,Genbank:NM_024656.3,HGNC:HGNC:26182,MIM:617531	collagen beta(1-O)galactosyltransferase 1	GO:0005788,GO:0016020,GO:0050211,GO:1904028	endoplasmic reticulum lumen|membrane|procollagen galactosyltransferase activity|positive regulation of collagen fibril organization	path:hsa00310,path:hsa00514	Lysine degradation|Other types of O-glycan biosynthesis
hsa-miR-1180-3p	XM_011528503.1	153	-30.6	153	-30.6	72026	22	2212	739	ADRM1	GeneID:11047,Genbank:XM_017027602.1,HGNC:HGNC:15759,MIM:610650	adhesion regulating molecule 1	GO:0000502,GO:0002020,GO:0005654,GO:0005829,GO:0005886,GO:0005887,GO:0006368,GO:0006511,GO:0008541,GO:0016020,GO:0016579,GO:0043130,GO:0043248,GO:0061133,GO:0070628	proteasome complex|protease binding|nucleoplasm|cytosol|plasma membrane|integral component of plasma membrane|transcription elongation from RNA polymerase II promoter|ubiquitin-dependent protein catabolic process|proteasome regulatory particle, lid subcomplex|membrane|protein deubiquitination|ubiquitin binding|proteasome assembly|endopeptidase activator activity|proteasome binding	path:hsa03050,path:hsa05169	Proteasome|Epstein-Barr virus infection
hsa-miR-1180-3p	XM_011528653.2	157	-30.58	157	-30.58	72121	22	3939	1712	DNMT3B	GeneID:1789,Genbank:NM_006892.3,HGNC:HGNC:2979,MIM:602900	DNA methyltransferase 3 beta			path:hsa00270,path:hsa05206	Cysteine and methionine metabolism|MicroRNAs in cancer
hsa-miR-1180-3p	XM_011528654.2	157	-30.58	157	-30.58	72122	22	3710	1587	DNMT3B	GeneID:1789,Genbank:NM_006892.3,HGNC:HGNC:2979,MIM:602900	DNA methyltransferase 3 beta			path:hsa00270,path:hsa05206	Cysteine and methionine metabolism|MicroRNAs in cancer
hsa-miR-1180-3p	XM_011529383.3	155	-31.35	155	-31.35	72500	22	4693	1289	SLC4A11	GeneID:83959,Genbank:NM_001174089.1,HGNC:HGNC:16438,MIM:610206	solute carrier family 4 member 11	GO:0005272,GO:0005452,GO:0005887,GO:0006814,GO:0015106,GO:0015252,GO:0015293,GO:0015301,GO:0015701,GO:0015992,GO:0016323,GO:0030003,GO:0042044,GO:0046713,GO:0046715,GO:0046983,GO:0051453	sodium channel activity|inorganic anion exchanger activity|integral component of plasma membrane|sodium ion transport|bicarbonate transmembrane transporter activity|proton channel activity|symporter activity|anion:anion antiporter activity|bicarbonate transport|proton transport|basolateral plasma membrane|cellular cation homeostasis|fluid transport|borate transport|active borate transmembrane tra…
hsa-miR-1180-3p	XM_011529394.1	165	-31.22	165	-31.22	72509	22	2240	241	MGME1	GeneID:92667,Genbank:XM_017028128.1,HGNC:HGNC:16205,MIM:615076	mitochondrial genome maintenance exonuclease 1	GO:0000002,GO:0003677,GO:0005739,GO:0006264,GO:0008297,GO:0043504	mitochondrial genome maintenance|DNA binding|mitochondrion|mitochondrial DNA replication|single-stranded DNA exodeoxyribonuclease activity|mitochondrial DNA repair
hsa-miR-1180-3p	XM_011529395.1	165	-31.22	165	-31.22	72510	22	2118	404	MGME1	GeneID:92667,Genbank:XM_017028128.1,HGNC:HGNC:16205,MIM:615076	mitochondrial genome maintenance exonuclease 1	GO:0000002,GO:0003677,GO:0005739,GO:0006264,GO:0008297,GO:0043504	mitochondrial genome maintenance|DNA binding|mitochondrion|mitochondrial DNA replication|single-stranded DNA exodeoxyribonuclease activity|mitochondrial DNA repair
hsa-miR-1180-3p	XM_011529637.2	176	-35.92	176	-35.92	72643	22	3616	461	SETD4	GeneID:54093,Genbank:XM_011529642.2,HGNC:HGNC:1258	SET domain containing 4	GO:0005730,GO:0016279,GO:0018023,GO:0018026,GO:0042254	nucleolus|protein-lysine N-methyltransferase activity|peptidyl-lysine trimethylation|peptidyl-lysine monomethylation|ribosome biogenesis
hsa-miR-1180-3p	XM_011529642.2	176	-35.92	176	-35.92	72647	22	3645	461	SETD4	GeneID:54093,Genbank:XM_011529642.2,HGNC:HGNC:1258	SET domain containing 4	GO:0005730,GO:0016279,GO:0018023,GO:0018026,GO:0042254	nucleolus|protein-lysine N-methyltransferase activity|peptidyl-lysine trimethylation|peptidyl-lysine monomethylation|ribosome biogenesis
hsa-miR-1180-3p	XM_011529643.1	176	-35.92	176	-35.92	72648	22	3377	242	SETD4	GeneID:54093,Genbank:XM_011529642.2,HGNC:HGNC:1258	SET domain containing 4	GO:0005730,GO:0016279,GO:0018023,GO:0018026,GO:0042254	nucleolus|protein-lysine N-methyltransferase activity|peptidyl-lysine trimethylation|peptidyl-lysine monomethylation|ribosome biogenesis
hsa-miR-1180-3p	XM_011532564.2	161	-33.61	161	-33.61	74227	22	4598	1937	GAREM2	GeneID:150946,Genbank:NM_001168241.1,HGNC:HGNC:27172	GRB2 associated regulator of MAPK1 subtype 2	GO:0070062	extracellular exosome
hsa-miR-1180-3p	XM_011532565.3	161	-33.61	161	-33.61	74228	22	4170	1509	GAREM2	GeneID:150946,Genbank:NM_001168241.1,HGNC:HGNC:27172	GRB2 associated regulator of MAPK1 subtype 2	GO:0070062	extracellular exosome
hsa-miR-1180-3p	XM_011532566.2	161	-33.61	161	-33.61	74229	22	3929	1268	GAREM2	GeneID:150946,Genbank:NM_001168241.1,HGNC:HGNC:27172	GRB2 associated regulator of MAPK1 subtype 2	GO:0070062	extracellular exosome
hsa-miR-1180-3p	XM_011532567.3	161	-33.61	161	-33.61	74230	22	2073	1463	GAREM2	GeneID:150946,Genbank:NM_001168241.1,HGNC:HGNC:27172	GRB2 associated regulator of MAPK1 subtype 2	GO:0070062	extracellular exosome
hsa-miR-1180-3p	XM_011533164.2	162	-31.09	162	-31.09	74557	22	4848	323	CD8B	GeneID:926,Genbank:NM_001178100.1,HGNC:HGNC:1707,MIM:186730	CD8b molecule			path:hsa04514,path:hsa04612,path:hsa04640,path:hsa04660,path:hsa05340	Cell adhesion molecules (CAMs)|Antigen processing and presentation|Hematopoietic cell lineage|T cell receptor signaling pathway|Primary immunodeficiency
hsa-miR-1180-3p	XM_011533335.2	173	-33.01	173	-33.01	74641	22	1817	1383	CCR3	GeneID:1232,Genbank:XM_017005686.1,HGNC:HGNC:1604,MIM:601268	C-C motif chemokine receptor 3			path:hsa04060,path:hsa04062,path:hsa05163,path:hsa05167,path:hsa05203	Cytokine-cytokine receptor interaction|Chemokine signaling pathway|Human cytomegalovirus infection|Kaposi sarcoma-associated herpesvirus infection|Viral carcinogenesis
hsa-miR-1180-3p	XM_011533337.1	162	-32.89	162	-32.89	74642	22	9204	1803	COL7A1	GeneID:1294,Genbank:XM_017005688.1,HGNC:HGNC:2214,MIM:120120	collagen type VII alpha 1 chain	GO:0000139,GO:0004867,GO:0005576,GO:0005590,GO:0005604,GO:0005615,GO:0005788,GO:0006888,GO:0007155,GO:0008544,GO:0030134,GO:0030198,GO:0030574,GO:0033116,GO:0035987,GO:0042802,GO:0048208	Golgi membrane|serine-type endopeptidase inhibitor activity|extracellular region|collagen type VII trimer|basement membrane|extracellular space|endoplasmic reticulum lumen|ER to Golgi vesicle-mediated transport|cell adhesion|epidermis development|COPII-coated ER to Golgi transport vesicle|extracellular matrix organization|collagen catabolic process|endoplasmic reticulum-Golgi intermediate compart…	path:hsa04974	Protein digestion and absorption
hsa-miR-1180-3p	XM_011533427.2	163	-34.71	163	-34.71	74685	22	6493	36	CNTN4	GeneID:152330,Genbank:NM_001350095.1,HGNC:HGNC:2174,MIM:607280	contactin 4	GO:0005576,GO:0005886,GO:0006501,GO:0007158,GO:0007399,GO:0007409,GO:0007411,GO:0007413,GO:0007420,GO:0030424,GO:0031175,GO:0031225,GO:0045665,GO:0048167	extracellular region|plasma membrane|C-terminal protein lipidation|neuron cell-cell adhesion|nervous system development|axonogenesis|axon guidance|axonal fasciculation|brain development|axon|neuron projection development|anchored component of membrane|negative regulation of neuron differentiation|regulation of synaptic plasticity
hsa-miR-1180-3p	XM_011533503.2	175	-32.13	175	-32.13	74729	22	3746	445	CAND2	GeneID:23066,Genbank:XM_011533503.2,HGNC:HGNC:30689,MIM:610403	cullin associated and neddylation dissociated 2 (putative)	GO:0005622,GO:0005634,GO:0006351,GO:0010265,GO:0016567,GO:0017025,GO:0045893	intracellular|nucleus|transcription, DNA-templated|SCF complex assembly|protein ubiquitination|TBP-class protein binding|positive regulation of transcription, DNA-templated
hsa-miR-1180-3p	XM_011533504.2	175	-32.13	175	-32.13	74730	22	4710	541	CAND2	GeneID:23066,Genbank:XM_011533503.2,HGNC:HGNC:30689,MIM:610403	cullin associated and neddylation dissociated 2 (putative)	GO:0005622,GO:0005634,GO:0006351,GO:0010265,GO:0016567,GO:0017025,GO:0045893	intracellular|nucleus|transcription, DNA-templated|SCF complex assembly|protein ubiquitination|TBP-class protein binding|positive regulation of transcription, DNA-templated
hsa-miR-1180-3p	XM_011533895.2	167	-35.34	167	-35.34	74916	22	2594	2	SHQ1	GeneID:55164,Genbank:NM_018130.2,HGNC:HGNC:25543,MIM:613663	SHQ1, H/ACA ribonucleoprotein assembly factor	GO:0000493,GO:0005654,GO:0005737,GO:0005829,GO:0022618,GO:0043065,GO:0051082,GO:1904874,GO:2000233	box H/ACA snoRNP assembly|nucleoplasm|cytoplasm|cytosol|ribonucleoprotein complex assembly|positive regulation of apoptotic process|unfolded protein binding|positive regulation of telomerase RNA localization to Cajal body|negative regulation of rRNA processing
hsa-miR-1180-3p	XM_011533896.2	167	-35.34	167	-35.34	74917	22	2278	2	SHQ1	GeneID:55164,Genbank:NM_018130.2,HGNC:HGNC:25543,MIM:613663	SHQ1, H/ACA ribonucleoprotein assembly factor	GO:0000493,GO:0005654,GO:0005737,GO:0005829,GO:0022618,GO:0043065,GO:0051082,GO:1904874,GO:2000233	box H/ACA snoRNP assembly|nucleoplasm|cytoplasm|cytosol|ribonucleoprotein complex assembly|positive regulation of apoptotic process|unfolded protein binding|positive regulation of telomerase RNA localization to Cajal body|negative regulation of rRNA processing
hsa-miR-1180-3p	XM_011533897.2	167	-35.34	167	-35.34	74918	22	1935	2	SHQ1	GeneID:55164,Genbank:NM_018130.2,HGNC:HGNC:25543,MIM:613663	SHQ1, H/ACA ribonucleoprotein assembly factor	GO:0000493,GO:0005654,GO:0005737,GO:0005829,GO:0022618,GO:0043065,GO:0051082,GO:1904874,GO:2000233	box H/ACA snoRNP assembly|nucleoplasm|cytoplasm|cytosol|ribonucleoprotein complex assembly|positive regulation of apoptotic process|unfolded protein binding|positive regulation of telomerase RNA localization to Cajal body|negative regulation of rRNA processing
hsa-miR-1180-3p	XM_011533898.2	167	-35.34	167	-35.34	74919	22	1411	2	SHQ1	GeneID:55164,Genbank:NM_018130.2,HGNC:HGNC:25543,MIM:613663	SHQ1, H/ACA ribonucleoprotein assembly factor	GO:0000493,GO:0005654,GO:0005737,GO:0005829,GO:0022618,GO:0043065,GO:0051082,GO:1904874,GO:2000233	box H/ACA snoRNP assembly|nucleoplasm|cytoplasm|cytosol|ribonucleoprotein complex assembly|positive regulation of apoptotic process|unfolded protein binding|positive regulation of telomerase RNA localization to Cajal body|negative regulation of rRNA processing
hsa-miR-1180-3p	XM_011533899.1	167	-35.34	167	-35.34	74920	22	1796	2	SHQ1	GeneID:55164,Genbank:NM_018130.2,HGNC:HGNC:25543,MIM:613663	SHQ1, H/ACA ribonucleoprotein assembly factor	GO:0000493,GO:0005654,GO:0005737,GO:0005829,GO:0022618,GO:0043065,GO:0051082,GO:1904874,GO:2000233	box H/ACA snoRNP assembly|nucleoplasm|cytoplasm|cytosol|ribonucleoprotein complex assembly|positive regulation of apoptotic process|unfolded protein binding|positive regulation of telomerase RNA localization to Cajal body|negative regulation of rRNA processing
hsa-miR-1180-3p	XM_011534638.1	167	-32.13	167	-32.13	75288	22	1454	847	BNIP1	GeneID:662,Genbank:NM_013979.2,HGNC:HGNC:1082,MIM:603291	BCL2 interacting protein 1			path:hsa04130	SNARE interactions in vesicular transport
hsa-miR-1180-3p	XM_011534669.2	161	-32.52	161	-32.52	75308	22	1980	23	PHYKPL	GeneID:85007,Genbank:NM_153373.3,HGNC:HGNC:28249,MIM:614683	5-phosphohydroxy-L-lysine phospho-lyase	GO:0005739,GO:0005759,GO:0006554,GO:0008453,GO:0016829,GO:0030170,GO:0030574,GO:0042802	mitochondrion|mitochondrial matrix|lysine catabolic process|alanine-glyoxylate transaminase activity|lyase activity|pyridoxal phosphate binding|collagen catabolic process|identical protein binding	path:hsa00310	Lysine degradation
hsa-miR-1180-3p	XM_011534671.2	161	-32.52	161	-32.52	75310	22	1968	23	PHYKPL	GeneID:85007,Genbank:NM_153373.3,HGNC:HGNC:28249,MIM:614683	5-phosphohydroxy-L-lysine phospho-lyase	GO:0005739,GO:0005759,GO:0006554,GO:0008453,GO:0016829,GO:0030170,GO:0030574,GO:0042802	mitochondrion|mitochondrial matrix|lysine catabolic process|alanine-glyoxylate transaminase activity|lyase activity|pyridoxal phosphate binding|collagen catabolic process|identical protein binding	path:hsa00310	Lysine degradation
hsa-miR-1180-3p	XM_011534674.2	161	-32.52	161	-32.52	75312	22	1635	23	PHYKPL	GeneID:85007,Genbank:NM_153373.3,HGNC:HGNC:28249,MIM:614683	5-phosphohydroxy-L-lysine phospho-lyase	GO:0005739,GO:0005759,GO:0006554,GO:0008453,GO:0016829,GO:0030170,GO:0030574,GO:0042802	mitochondrion|mitochondrial matrix|lysine catabolic process|alanine-glyoxylate transaminase activity|lyase activity|pyridoxal phosphate binding|collagen catabolic process|identical protein binding	path:hsa00310	Lysine degradation
hsa-miR-1180-3p	XM_011534854.3	1440	-276.03	160	-30.99	75403	22	4567	1267 1307 1467 1507 1547 1627 1667 1747 1907	LOC105377805	GeneID:105377805,Genbank:XM_017020908.2	basic salivary proline-rich protein 4-like
hsa-miR-1180-3p	XM_011536641.2	167	-32.27	167	-32.27	76338	22	5902	1755	KIF26A	GeneID:26153,Genbank:NM_015656.1,HGNC:HGNC:20226,MIM:613231	kinesin family member 26A	GO:0001560,GO:0003777,GO:0005524,GO:0005829,GO:0005871,GO:0005874,GO:0006890,GO:0007018,GO:0008017,GO:0009968,GO:0019886,GO:0048484	regulation of cell growth by extracellular stimulus|microtubule motor activity|ATP binding|cytosol|kinesin complex|microtubule|retrograde vesicle-mediated transport, Golgi to ER|microtubule-based movement|microtubule binding|negative regulation of signal transduction|antigen processing and presentation of exogenous peptide antigen via MHC class II|enteric nervous system development
hsa-miR-1180-3p	XM_011536672.3	162	-30.96	162	-30.96	76359	22	2963	417	BRF1	GeneID:2972,Genbank:NM_001242787.1,HGNC:HGNC:11551,MIM:604902	BRF1, RNA polymerase III transcription initiation factor subunit	GO:0000126,GO:0001026,GO:0005654,GO:0006383,GO:0006384,GO:0009303,GO:0009304,GO:0017025,GO:0045945,GO:0046872,GO:0070897	transcription factor TFIIIB complex|TFIIIB-type transcription factor activity|nucleoplasm|transcription from RNA polymerase III promoter|transcription initiation from RNA polymerase III promoter|rRNA transcription|tRNA transcription|TBP-class protein binding|positive regulation of transcription from RNA polymerase III promoter|metal ion binding|DNA-templated transcriptional preinitiation complex …
hsa-miR-1180-3p	XM_011536673.2	162	-30.96	162	-30.96	76360	22	3208	417	BRF1	GeneID:2972,Genbank:NM_001242787.1,HGNC:HGNC:11551,MIM:604902	BRF1, RNA polymerase III transcription initiation factor subunit	GO:0000126,GO:0001026,GO:0005654,GO:0006383,GO:0006384,GO:0009303,GO:0009304,GO:0017025,GO:0045945,GO:0046872,GO:0070897	transcription factor TFIIIB complex|TFIIIB-type transcription factor activity|nucleoplasm|transcription from RNA polymerase III promoter|transcription initiation from RNA polymerase III promoter|rRNA transcription|tRNA transcription|TBP-class protein binding|positive regulation of transcription from RNA polymerase III promoter|metal ion binding|DNA-templated transcriptional preinitiation complex …
hsa-miR-1180-3p	XM_011537624.2	170	-31.37	170	-31.37	76828	22	2514	727	RELL2	GeneID:285613,Genbank:NM_173828.4,HGNC:HGNC:26902,MIM:611213	RELT like 2	GO:0005518,GO:0005604,GO:0005886,GO:0010811,GO:0016021	collagen binding|basement membrane|plasma membrane|positive regulation of cell-substrate adhesion|integral component of membrane
hsa-miR-1180-3p	XM_011537625.3	170	-31.37	170	-31.37	76829	22	2701	727	RELL2	GeneID:285613,Genbank:NM_173828.4,HGNC:HGNC:26902,MIM:611213	RELT like 2	GO:0005518,GO:0005604,GO:0005886,GO:0010811,GO:0016021	collagen binding|basement membrane|plasma membrane|positive regulation of cell-substrate adhesion|integral component of membrane
hsa-miR-1180-3p	XM_011537714.3	158	-31.92	158	-31.92	76874	22	2903	53	RNF14	GeneID:9604,Genbank:XM_024446265.1,HGNC:HGNC:10058,MIM:605675	ring finger protein 14	GO:0000151,GO:0000209,GO:0003713,GO:0005634,GO:0005737,GO:0005829,GO:0006351,GO:0006355,GO:0006357,GO:0007165,GO:0016567,GO:0019787,GO:0030521,GO:0031624,GO:0032436,GO:0042787,GO:0045893,GO:0046872,GO:0050681,GO:0060765,GO:0061630	ubiquitin ligase complex|protein polyubiquitination|transcription coactivator activity|nucleus|cytoplasm|cytosol|transcription, DNA-templated|regulation of transcription, DNA-templated|regulation of transcription from RNA polymerase II promoter|signal transduction|protein ubiquitination|ubiquitin-like protein transferase activity|androgen receptor signaling pathway|ubiquitin conjugating enzyme bi…
hsa-miR-1180-3p	XM_011537730.3	172	-33.99	172	-33.99	76885	22	5750	736	PLXNC1	GeneID:10154,Genbank:NM_005761.2,HGNC:HGNC:9106,MIM:604259	plexin C1	GO:0005102,GO:0005886,GO:0007155,GO:0007162,GO:0008360,GO:0016020,GO:0016021,GO:0017154,GO:0043087,GO:0050772	receptor binding|plasma membrane|cell adhesion|negative regulation of cell adhesion|regulation of cell shape|membrane|integral component of membrane|semaphorin receptor activity|regulation of GTPase activity|positive regulation of axonogenesis	path:hsa04360	Axon guidance
hsa-miR-1180-3p	XM_011537731.3	172	-33.99	172	-33.99	76886	22	4297	736	PLXNC1	GeneID:10154,Genbank:NM_005761.2,HGNC:HGNC:9106,MIM:604259	plexin C1	GO:0005102,GO:0005886,GO:0007155,GO:0007162,GO:0008360,GO:0016020,GO:0016021,GO:0017154,GO:0043087,GO:0050772	receptor binding|plasma membrane|cell adhesion|negative regulation of cell adhesion|regulation of cell shape|membrane|integral component of membrane|semaphorin receptor activity|regulation of GTPase activity|positive regulation of axonogenesis	path:hsa04360	Axon guidance
hsa-miR-1180-3p	XM_011538471.2	163	-30.08	163	-30.08	77249	22	3375	13	PPHLN1	GeneID:51535,Genbank:XM_017019449.1,HGNC:HGNC:19369,MIM:608150	periphilin 1	GO:0003723,GO:0005654,GO:0005694,GO:0005794,GO:0005829,GO:0006351,GO:0031424,GO:0045892	RNA binding|nucleoplasm|chromosome|Golgi apparatus|cytosol|transcription, DNA-templated|keratinization|negative regulation of transcription, DNA-templated
hsa-miR-1180-3p	XM_011539373.3	167	-32.93	167	-32.93	77675	22	2181	242	SLC35G1	GeneID:159371,Genbank:XM_011539373.3,HGNC:HGNC:26607,MIM:617167	solute carrier family 35 member G1	GO:0005789,GO:0005886,GO:0016021,GO:0051480,GO:1990034	endoplasmic reticulum membrane|plasma membrane|integral component of membrane|regulation of cytosolic calcium ion concentration|calcium ion export across plasma membrane
hsa-miR-1180-3p	XM_011541083.2	161	-32.23	161	-32.23	78534	22	8298	1472	CAMTA1	GeneID:23261,Genbank:NM_015215.3,HGNC:HGNC:18806,MIM:611501	calmodulin binding transcription activator 1
hsa-miR-1180-3p	XM_011541084.2	161	-32.23	161	-32.23	78535	22	8329	1472	CAMTA1	GeneID:23261,Genbank:NM_015215.3,HGNC:HGNC:18806,MIM:611501	calmodulin binding transcription activator 1
hsa-miR-1180-3p	XM_011541086.3	161	-32.23	161	-32.23	78536	22	6737	1472	CAMTA1	GeneID:23261,Genbank:NM_015215.3,HGNC:HGNC:18806,MIM:611501	calmodulin binding transcription activator 1
hsa-miR-1180-3p	XM_011541087.2	161	-32.23	161	-32.23	78537	22	6376	1400	CAMTA1	GeneID:23261,Genbank:NM_015215.3,HGNC:HGNC:18806,MIM:611501	calmodulin binding transcription activator 1
hsa-miR-1180-3p	XM_011541088.2	161	-32.23	161	-32.23	78538	22	6378	1402	CAMTA1	GeneID:23261,Genbank:NM_015215.3,HGNC:HGNC:18806,MIM:611501	calmodulin binding transcription activator 1
hsa-miR-1180-3p	XM_011541090.3	161	-32.23	161	-32.23	78539	22	7990	1472	CAMTA1	GeneID:23261,Genbank:NM_015215.3,HGNC:HGNC:18806,MIM:611501	calmodulin binding transcription activator 1
hsa-miR-1180-3p	XM_011541091.2	161	-32.23	161	-32.23	78540	22	3245	1472	CAMTA1	GeneID:23261,Genbank:NM_015215.3,HGNC:HGNC:18806,MIM:611501	calmodulin binding transcription activator 1
hsa-miR-1180-3p	XM_011541092.3	161	-32.23	161	-32.23	78541	22	4906	1472	CAMTA1	GeneID:23261,Genbank:NM_015215.3,HGNC:HGNC:18806,MIM:611501	calmodulin binding transcription activator 1
hsa-miR-1180-3p	XM_011541498.1	155	-30.89	155	-30.89	78752	22	1765	36	MUTYH	GeneID:4595,Genbank:NM_001350651.1,HGNC:HGNC:7527,MIM:604933	mutY DNA glycosylase			path:hsa03410	Base excision repair
hsa-miR-1180-3p	XM_011541504.2	155	-30.89	155	-30.89	78758	22	1814	94	MUTYH	GeneID:4595,Genbank:NM_001350651.1,HGNC:HGNC:7527,MIM:604933	mutY DNA glycosylase			path:hsa03410	Base excision repair
hsa-miR-1180-3p	XM_011541506.2	155	-30.89	155	-30.89	78760	22	1476	94	MUTYH	GeneID:4595,Genbank:NM_001350651.1,HGNC:HGNC:7527,MIM:604933	mutY DNA glycosylase			path:hsa03410	Base excision repair
hsa-miR-1180-3p	XM_011541848.3	163	-32.04	163	-32.04	78940	22	5398	1636	ADGRB2	GeneID:576,Genbank:XM_011541849.2,HGNC:HGNC:944,MIM:602683	adhesion G protein-coupled receptor B2	GO:0004930,GO:0005813,GO:0005886,GO:0007166,GO:0007186,GO:0007422,GO:0016021,GO:0016525,GO:0033173,GO:0051965	G-protein coupled receptor activity|centrosome|plasma membrane|cell surface receptor signaling pathway|G-protein coupled receptor signaling pathway|peripheral nervous system development|integral component of membrane|negative regulation of angiogenesis|calcineurin-NFAT signaling cascade|positive regulation of synapse assembly
hsa-miR-1180-3p	XM_011541849.2	163	-32.04	163	-32.04	78941	22	5232	1470	ADGRB2	GeneID:576,Genbank:XM_011541849.2,HGNC:HGNC:944,MIM:602683	adhesion G protein-coupled receptor B2	GO:0004930,GO:0005813,GO:0005886,GO:0007166,GO:0007186,GO:0007422,GO:0016021,GO:0016525,GO:0033173,GO:0051965	G-protein coupled receptor activity|centrosome|plasma membrane|cell surface receptor signaling pathway|G-protein coupled receptor signaling pathway|peripheral nervous system development|integral component of membrane|negative regulation of angiogenesis|calcineurin-NFAT signaling cascade|positive regulation of synapse assembly
hsa-miR-1180-3p	XM_011541858.2	326	-65.02	163	-32.98	78942	22	4396	152 634	ADGRB2	GeneID:576,Genbank:XM_011541849.2,HGNC:HGNC:944,MIM:602683	adhesion G protein-coupled receptor B2	GO:0004930,GO:0005813,GO:0005886,GO:0007166,GO:0007186,GO:0007422,GO:0016021,GO:0016525,GO:0033173,GO:0051965	G-protein coupled receptor activity|centrosome|plasma membrane|cell surface receptor signaling pathway|G-protein coupled receptor signaling pathway|peripheral nervous system development|integral component of membrane|negative regulation of angiogenesis|calcineurin-NFAT signaling cascade|positive regulation of synapse assembly
hsa-miR-1180-3p	XM_011542333.2	163	-31.38	163	-31.38	79149	22	5323	2181	CFAP74	GeneID:85452,Genbank:NM_001304360.1,HGNC:HGNC:29368	cilia and flagella associated protein 74	GO:0005930,GO:0035082	axoneme|axoneme assembly
hsa-miR-1180-3p	XM_011542335.1	163	-31.38	163	-31.38	79150	22	4835	1693	CFAP74	GeneID:85452,Genbank:NM_001304360.1,HGNC:HGNC:29368	cilia and flagella associated protein 74	GO:0005930,GO:0035082	axoneme|axoneme assembly
hsa-miR-1180-3p	XM_011542336.3	163	-31.38	163	-31.38	79151	22	6571	3429	CFAP74	GeneID:85452,Genbank:NM_001304360.1,HGNC:HGNC:29368	cilia and flagella associated protein 74	GO:0005930,GO:0035082	axoneme|axoneme assembly
hsa-miR-1180-3p	XM_011542383.2	172	-32.31	172	-32.31	79165	22	1751	473	TNFRSF14	GeneID:8764,Genbank:NM_003820.3,HGNC:HGNC:11912,MIM:602746	TNF receptor superfamily member 14			path:hsa04060,path:hsa05168	Cytokine-cytokine receptor interaction|Herpes simplex infection
hsa-miR-1180-3p	XM_011542527.2	170	-30.1	170	-30.1	79211	22	1396	128	LOC105378862	GeneID:105378862,Genbank:XM_011542527.2	translation initiation factor IF-2-like
hsa-miR-1180-3p	XM_011543906.3	175	-36.56	175	-36.56	79932	22	3820	188	ARAF	GeneID:369,Genbank:NM_001256196.1,HGNC:HGNC:646,MIM:311010	A-Raf proto-oncogene, serine/threonine kinase	GO:0000165,GO:0004672,GO:0004674,GO:0004709,GO:0005524,GO:0005739,GO:0005829,GO:0006464,GO:0007275,GO:0009968,GO:0030154,GO:0031434,GO:0032006,GO:0032434,GO:0033138,GO:0043066,GO:0046872,GO:0070374	MAPK cascade|protein kinase activity|protein serine/threonine kinase activity|MAP kinase kinase kinase activity|ATP binding|mitochondrion|cytosol|cellular protein modification process|multicellular organism development|negative regulation of signal transduction|cell differentiation|mitogen-activated protein kinase kinase binding|regulation of TOR signaling|regulation of proteasomal ubiquitin-depe…	path:hsa01521,path:hsa01522,path:hsa04010,path:hsa04012,path:hsa04068,path:hsa04270,path:hsa04650,path:hsa04720,path:hsa04726,path:hsa04730,path:hsa04810,path:hsa04910,path:hsa04914,path:hsa04928,path:hsa05034,path:hsa05160,path:hsa05200,path:hsa05205,path:hsa05210,path:hsa05211,path:hsa05212,path:hsa05213,path:hsa05214,path:hsa05215,path:hsa05218,path:hsa05219,path:hsa05220,path:hsa05221,path:hs…	EGFR tyrosine kinase inhibitor resistance|Endocrine resistance|MAPK signaling pathway|ErbB signaling pathway|FoxO signaling pathway|Vascular smooth muscle contraction|Natural killer cell mediated cytotoxicity|Long-term potentiation|Serotonergic synapse|Long-term depression|Regulation of actin cytoskeleton|Insulin signaling pathway|Progesterone-mediated oocyte maturation|Parathyroid hormone synthe…
hsa-miR-1180-3p	XM_011543908.3	175	-36.56	175	-36.56	79933	22	3804	187	ARAF	GeneID:369,Genbank:NM_001256196.1,HGNC:HGNC:646,MIM:311010	A-Raf proto-oncogene, serine/threonine kinase	GO:0000165,GO:0004672,GO:0004674,GO:0004709,GO:0005524,GO:0005739,GO:0005829,GO:0006464,GO:0007275,GO:0009968,GO:0030154,GO:0031434,GO:0032006,GO:0032434,GO:0033138,GO:0043066,GO:0046872,GO:0070374	MAPK cascade|protein kinase activity|protein serine/threonine kinase activity|MAP kinase kinase kinase activity|ATP binding|mitochondrion|cytosol|cellular protein modification process|multicellular organism development|negative regulation of signal transduction|cell differentiation|mitogen-activated protein kinase kinase binding|regulation of TOR signaling|regulation of proteasomal ubiquitin-depe…	path:hsa01521,path:hsa01522,path:hsa04010,path:hsa04012,path:hsa04068,path:hsa04270,path:hsa04650,path:hsa04720,path:hsa04726,path:hsa04730,path:hsa04810,path:hsa04910,path:hsa04914,path:hsa04928,path:hsa05034,path:hsa05160,path:hsa05200,path:hsa05205,path:hsa05210,path:hsa05211,path:hsa05212,path:hsa05213,path:hsa05214,path:hsa05215,path:hsa05218,path:hsa05219,path:hsa05220,path:hsa05221,path:hs…	EGFR tyrosine kinase inhibitor resistance|Endocrine resistance|MAPK signaling pathway|ErbB signaling pathway|FoxO signaling pathway|Vascular smooth muscle contraction|Natural killer cell mediated cytotoxicity|Long-term potentiation|Serotonergic synapse|Long-term depression|Regulation of actin cytoskeleton|Insulin signaling pathway|Progesterone-mediated oocyte maturation|Parathyroid hormone synthe…
hsa-miR-1180-3p	XM_011544209.3	168	-30.16	168	-30.16	80095	22	3157	1509	TRIM17	GeneID:51127,Genbank:XM_011544210.3,HGNC:HGNC:13430,MIM:606123	tripartite motif containing 17	GO:0004842,GO:0005622,GO:0006914,GO:0008270,GO:0030674,GO:0032880,GO:0051865	ubiquitin-protein transferase activity|intracellular|autophagy|zinc ion binding|protein binding, bridging|regulation of protein localization|protein autoubiquitination
hsa-miR-1180-3p	XM_011544210.3	168	-30.16	168	-30.16	80096	22	3259	1611	TRIM17	GeneID:51127,Genbank:XM_011544210.3,HGNC:HGNC:13430,MIM:606123	tripartite motif containing 17	GO:0004842,GO:0005622,GO:0006914,GO:0008270,GO:0030674,GO:0032880,GO:0051865	ubiquitin-protein transferase activity|intracellular|autophagy|zinc ion binding|protein binding, bridging|regulation of protein localization|protein autoubiquitination
hsa-miR-1180-3p	XM_011544211.3	168	-30.16	168	-30.16	80097	22	3160	1512	TRIM17	GeneID:51127,Genbank:XM_011544210.3,HGNC:HGNC:13430,MIM:606123	tripartite motif containing 17	GO:0004842,GO:0005622,GO:0006914,GO:0008270,GO:0030674,GO:0032880,GO:0051865	ubiquitin-protein transferase activity|intracellular|autophagy|zinc ion binding|protein binding, bridging|regulation of protein localization|protein autoubiquitination
hsa-miR-1180-3p	XM_011544490.3	161	-34.22	161	-34.22	80257	22	8492	1953	ANK1	GeneID:286,Genbank:NM_001142446.1,HGNC:HGNC:492,MIM:612641	ankyrin 1			path:hsa05205	Proteoglycans in cancer
hsa-miR-1180-3p	XM_011544491.3	161	-34.22	161	-34.22	80258	22	8551	1952	ANK1	GeneID:286,Genbank:NM_001142446.1,HGNC:HGNC:492,MIM:612641	ankyrin 1			path:hsa05205	Proteoglycans in cancer
hsa-miR-1180-3p	XM_011544494.3	161	-34.22	161	-34.22	80259	22	8447	1953	ANK1	GeneID:286,Genbank:NM_001142446.1,HGNC:HGNC:492,MIM:612641	ankyrin 1			path:hsa05205	Proteoglycans in cancer
hsa-miR-1180-3p	XM_011544495.3	161	-34.22	161	-34.22	80260	22	8506	1952	ANK1	GeneID:286,Genbank:NM_001142446.1,HGNC:HGNC:492,MIM:612641	ankyrin 1			path:hsa05205	Proteoglycans in cancer
hsa-miR-1180-3p	XM_011544496.3	161	-34.22	161	-34.22	80261	22	8418	1954	ANK1	GeneID:286,Genbank:NM_001142446.1,HGNC:HGNC:492,MIM:612641	ankyrin 1			path:hsa05205	Proteoglycans in cancer
hsa-miR-1180-3p	XM_011544500.2	161	-34.22	161	-34.22	80262	22	8334	1864	ANK1	GeneID:286,Genbank:NM_001142446.1,HGNC:HGNC:492,MIM:612641	ankyrin 1			path:hsa05205	Proteoglycans in cancer
hsa-miR-1180-3p	XM_011544501.2	161	-34.22	161	-34.22	80263	22	8394	1864	ANK1	GeneID:286,Genbank:NM_001142446.1,HGNC:HGNC:492,MIM:612641	ankyrin 1			path:hsa05205	Proteoglycans in cancer
hsa-miR-1180-3p	XM_011544502.2	161	-34.22	161	-34.22	80264	22	8259	1864	ANK1	GeneID:286,Genbank:NM_001142446.1,HGNC:HGNC:492,MIM:612641	ankyrin 1			path:hsa05205	Proteoglycans in cancer
hsa-miR-1180-3p	XM_011544503.3	161	-34.22	161	-34.22	80265	22	8019	1951	ANK1	GeneID:286,Genbank:NM_001142446.1,HGNC:HGNC:492,MIM:612641	ankyrin 1			path:hsa05205	Proteoglycans in cancer
hsa-miR-1180-3p	XM_011544504.2	161	-34.22	161	-34.22	80266	22	7848	1864	ANK1	GeneID:286,Genbank:NM_001142446.1,HGNC:HGNC:492,MIM:612641	ankyrin 1			path:hsa05205	Proteoglycans in cancer
hsa-miR-1180-3p	XM_011544505.2	161	-34.22	161	-34.22	80267	22	7908	1864	ANK1	GeneID:286,Genbank:NM_001142446.1,HGNC:HGNC:492,MIM:612641	ankyrin 1			path:hsa05205	Proteoglycans in cancer
hsa-miR-1180-3p	XM_011544740.3	163	-37	163	-37	80393	22	2864	2441	SF3B2	GeneID:10992,Genbank:NM_006842.2,HGNC:HGNC:10769,MIM:605591	splicing factor 3b subunit 2	GO:0000398,GO:0003723,GO:0005654,GO:0005681,GO:0005684,GO:0005686,GO:0005689,GO:0006397,GO:0008380,GO:0016032,GO:0016607,GO:0071011,GO:0071013	mRNA splicing, via spliceosome|RNA binding|nucleoplasm|spliceosomal complex|U2-type spliceosomal complex|U2 snRNP|U12-type spliceosomal complex|mRNA processing|RNA splicing|viral process|nuclear speck|precatalytic spliceosome|catalytic step 2 spliceosome	path:hsa03040	Spliceosome
hsa-miR-1180-3p	XM_011545067.2	166	-32.56	166	-32.56	80566	22	2838	277	OVOL1	GeneID:5017,Genbank:NM_004561.3,HGNC:HGNC:8525,MIM:602313	ovo like transcriptional repressor 1	GO:0000978,GO:0000981,GO:0001078,GO:0001822,GO:0005634,GO:0006351,GO:0007283,GO:0007498,GO:0008544,GO:0043588,GO:0046872,GO:0051729,GO:1901994,GO:2000647	RNA polymerase II proximal promoter sequence-specific DNA binding|RNA polymerase II transcription factor activity, sequence-specific DNA binding|transcriptional repressor activity, RNA polymerase II proximal promoter sequence-specific DNA binding|kidney development|nucleus|transcription, DNA-templated|spermatogenesis|mesoderm development|epidermis development|skin development|metal ion binding|ge…
hsa-miR-1180-3p	XM_011545068.3	166	-32.56	166	-32.56	80567	22	3384	823	OVOL1	GeneID:5017,Genbank:NM_004561.3,HGNC:HGNC:8525,MIM:602313	ovo like transcriptional repressor 1	GO:0000978,GO:0000981,GO:0001078,GO:0001822,GO:0005634,GO:0006351,GO:0007283,GO:0007498,GO:0008544,GO:0043588,GO:0046872,GO:0051729,GO:1901994,GO:2000647	RNA polymerase II proximal promoter sequence-specific DNA binding|RNA polymerase II transcription factor activity, sequence-specific DNA binding|transcriptional repressor activity, RNA polymerase II proximal promoter sequence-specific DNA binding|kidney development|nucleus|transcription, DNA-templated|spermatogenesis|mesoderm development|epidermis development|skin development|metal ion binding|ge…
hsa-miR-1180-3p	XM_011545303.3	161	-37	161	-37	80718	22	2982	592	SYVN1	GeneID:84447,Genbank:NM_032431.2,HGNC:HGNC:20738,MIM:608046	synoviolin 1	GO:0000836,GO:0000839,GO:0005654,GO:0005783,GO:0005789,GO:0005790,GO:0016020,GO:0016567,GO:0018279,GO:0030176,GO:0030433,GO:0030968,GO:0030970,GO:0036498,GO:0036503,GO:0036513,GO:0042787,GO:0044322,GO:0046872,GO:0050821,GO:0051082,GO:0051087,GO:0051117,GO:0061630,GO:0070936,GO:1902236,GO:1904264,GO:1904380,GO:1990381	Hrd1p ubiquitin ligase complex|Hrd1p ubiquitin ligase ERAD-L complex|nucleoplasm|endoplasmic reticulum|endoplasmic reticulum membrane|smooth endoplasmic reticulum|membrane|protein ubiquitination|protein N-linked glycosylation via asparagine|integral component of endoplasmic reticulum membrane|ubiquitin-dependent ERAD pathway|endoplasmic reticulum unfolded protein response|retrograde protein trans…	path:hsa04120,path:hsa04141	Ubiquitin mediated proteolysis|Protein processing in endoplasmic reticulum
hsa-miR-1180-3p	XM_017000774.2	161	-32.23	161	-32.23	81826	22	10899	1472	CAMTA1	GeneID:23261,Genbank:NM_015215.3,HGNC:HGNC:18806,MIM:611501	calmodulin binding transcription activator 1
hsa-miR-1180-3p	XM_017000777.1	161	-32.23	161	-32.23	81827	22	7938	1472	CAMTA1	GeneID:23261,Genbank:NM_015215.3,HGNC:HGNC:18806,MIM:611501	calmodulin binding transcription activator 1
hsa-miR-1180-3p	XM_017000778.1	161	-32.23	161	-32.23	81828	22	7969	1472	CAMTA1	GeneID:23261,Genbank:NM_015215.3,HGNC:HGNC:18806,MIM:611501	calmodulin binding transcription activator 1
hsa-miR-1180-3p	XM_017001337.1	155	-30.89	155	-30.89	82300	22	1682	36	MUTYH	GeneID:4595,Genbank:NM_001350651.1,HGNC:HGNC:7527,MIM:604933	mutY DNA glycosylase			path:hsa03410	Base excision repair
hsa-miR-1180-3p	XM_017001419.1	168	-30.16	168	-30.16	82368	22	3074	2027	TRIM17	GeneID:51127,Genbank:XM_011544210.3,HGNC:HGNC:13430,MIM:606123	tripartite motif containing 17	GO:0004842,GO:0005622,GO:0006914,GO:0008270,GO:0030674,GO:0032880,GO:0051865	ubiquitin-protein transferase activity|intracellular|autophagy|zinc ion binding|protein binding, bridging|regulation of protein localization|protein autoubiquitination
hsa-miR-1180-3p	XM_017001899.1	163	-32.04	163	-32.04	82729	22	5527	1765	ADGRB2	GeneID:576,Genbank:XM_011541849.2,HGNC:HGNC:944,MIM:602683	adhesion G protein-coupled receptor B2	GO:0004930,GO:0005813,GO:0005886,GO:0007166,GO:0007186,GO:0007422,GO:0016021,GO:0016525,GO:0033173,GO:0051965	G-protein coupled receptor activity|centrosome|plasma membrane|cell surface receptor signaling pathway|G-protein coupled receptor signaling pathway|peripheral nervous system development|integral component of membrane|negative regulation of angiogenesis|calcineurin-NFAT signaling cascade|positive regulation of synapse assembly
hsa-miR-1180-3p	XM_017001900.1	163	-32.04	163	-32.04	82730	22	5496	1737	ADGRB2	GeneID:576,Genbank:XM_011541849.2,HGNC:HGNC:944,MIM:602683	adhesion G protein-coupled receptor B2	GO:0004930,GO:0005813,GO:0005886,GO:0007166,GO:0007186,GO:0007422,GO:0016021,GO:0016525,GO:0033173,GO:0051965	G-protein coupled receptor activity|centrosome|plasma membrane|cell surface receptor signaling pathway|G-protein coupled receptor signaling pathway|peripheral nervous system development|integral component of membrane|negative regulation of angiogenesis|calcineurin-NFAT signaling cascade|positive regulation of synapse assembly
hsa-miR-1180-3p	XM_017001901.1	163	-32.04	163	-32.04	82731	22	5442	1737	ADGRB2	GeneID:576,Genbank:XM_011541849.2,HGNC:HGNC:944,MIM:602683	adhesion G protein-coupled receptor B2	GO:0004930,GO:0005813,GO:0005886,GO:0007166,GO:0007186,GO:0007422,GO:0016021,GO:0016525,GO:0033173,GO:0051965	G-protein coupled receptor activity|centrosome|plasma membrane|cell surface receptor signaling pathway|G-protein coupled receptor signaling pathway|peripheral nervous system development|integral component of membrane|negative regulation of angiogenesis|calcineurin-NFAT signaling cascade|positive regulation of synapse assembly
hsa-miR-1180-3p	XM_017001902.1	163	-32.04	163	-32.04	82732	22	5440	1738	ADGRB2	GeneID:576,Genbank:XM_011541849.2,HGNC:HGNC:944,MIM:602683	adhesion G protein-coupled receptor B2	GO:0004930,GO:0005813,GO:0005886,GO:0007166,GO:0007186,GO:0007422,GO:0016021,GO:0016525,GO:0033173,GO:0051965	G-protein coupled receptor activity|centrosome|plasma membrane|cell surface receptor signaling pathway|G-protein coupled receptor signaling pathway|peripheral nervous system development|integral component of membrane|negative regulation of angiogenesis|calcineurin-NFAT signaling cascade|positive regulation of synapse assembly
hsa-miR-1180-3p	XM_017001903.1	163	-32.04	163	-32.04	82733	22	5431	1738	ADGRB2	GeneID:576,Genbank:XM_011541849.2,HGNC:HGNC:944,MIM:602683	adhesion G protein-coupled receptor B2	GO:0004930,GO:0005813,GO:0005886,GO:0007166,GO:0007186,GO:0007422,GO:0016021,GO:0016525,GO:0033173,GO:0051965	G-protein coupled receptor activity|centrosome|plasma membrane|cell surface receptor signaling pathway|G-protein coupled receptor signaling pathway|peripheral nervous system development|integral component of membrane|negative regulation of angiogenesis|calcineurin-NFAT signaling cascade|positive regulation of synapse assembly
hsa-miR-1180-3p	XM_017001904.1	163	-32.04	163	-32.04	82734	22	5397	1734	ADGRB2	GeneID:576,Genbank:XM_011541849.2,HGNC:HGNC:944,MIM:602683	adhesion G protein-coupled receptor B2	GO:0004930,GO:0005813,GO:0005886,GO:0007166,GO:0007186,GO:0007422,GO:0016021,GO:0016525,GO:0033173,GO:0051965	G-protein coupled receptor activity|centrosome|plasma membrane|cell surface receptor signaling pathway|G-protein coupled receptor signaling pathway|peripheral nervous system development|integral component of membrane|negative regulation of angiogenesis|calcineurin-NFAT signaling cascade|positive regulation of synapse assembly
hsa-miR-1180-3p	XM_017001905.1	163	-32.04	163	-32.04	82735	22	5396	1736	ADGRB2	GeneID:576,Genbank:XM_011541849.2,HGNC:HGNC:944,MIM:602683	adhesion G protein-coupled receptor B2	GO:0004930,GO:0005813,GO:0005886,GO:0007166,GO:0007186,GO:0007422,GO:0016021,GO:0016525,GO:0033173,GO:0051965	G-protein coupled receptor activity|centrosome|plasma membrane|cell surface receptor signaling pathway|G-protein coupled receptor signaling pathway|peripheral nervous system development|integral component of membrane|negative regulation of angiogenesis|calcineurin-NFAT signaling cascade|positive regulation of synapse assembly
hsa-miR-1180-3p	XM_017001906.1	163	-32.04	163	-32.04	82736	22	5341	1735	ADGRB2	GeneID:576,Genbank:XM_011541849.2,HGNC:HGNC:944,MIM:602683	adhesion G protein-coupled receptor B2	GO:0004930,GO:0005813,GO:0005886,GO:0007166,GO:0007186,GO:0007422,GO:0016021,GO:0016525,GO:0033173,GO:0051965	G-protein coupled receptor activity|centrosome|plasma membrane|cell surface receptor signaling pathway|G-protein coupled receptor signaling pathway|peripheral nervous system development|integral component of membrane|negative regulation of angiogenesis|calcineurin-NFAT signaling cascade|positive regulation of synapse assembly
hsa-miR-1180-3p	XM_017001907.1	163	-32.04	163	-32.04	82737	22	5331	1569	ADGRB2	GeneID:576,Genbank:XM_011541849.2,HGNC:HGNC:944,MIM:602683	adhesion G protein-coupled receptor B2	GO:0004930,GO:0005813,GO:0005886,GO:0007166,GO:0007186,GO:0007422,GO:0016021,GO:0016525,GO:0033173,GO:0051965	G-protein coupled receptor activity|centrosome|plasma membrane|cell surface receptor signaling pathway|G-protein coupled receptor signaling pathway|peripheral nervous system development|integral component of membrane|negative regulation of angiogenesis|calcineurin-NFAT signaling cascade|positive regulation of synapse assembly
hsa-miR-1180-3p	XM_017001908.1	163	-32.04	163	-32.04	82738	22	5332	1570	ADGRB2	GeneID:576,Genbank:XM_011541849.2,HGNC:HGNC:944,MIM:602683	adhesion G protein-coupled receptor B2	GO:0004930,GO:0005813,GO:0005886,GO:0007166,GO:0007186,GO:0007422,GO:0016021,GO:0016525,GO:0033173,GO:0051965	G-protein coupled receptor activity|centrosome|plasma membrane|cell surface receptor signaling pathway|G-protein coupled receptor signaling pathway|peripheral nervous system development|integral component of membrane|negative regulation of angiogenesis|calcineurin-NFAT signaling cascade|positive regulation of synapse assembly
hsa-miR-1180-3p	XM_017001909.1	163	-32.04	163	-32.04	82739	22	5276	1571	ADGRB2	GeneID:576,Genbank:XM_011541849.2,HGNC:HGNC:944,MIM:602683	adhesion G protein-coupled receptor B2	GO:0004930,GO:0005813,GO:0005886,GO:0007166,GO:0007186,GO:0007422,GO:0016021,GO:0016525,GO:0033173,GO:0051965	G-protein coupled receptor activity|centrosome|plasma membrane|cell surface receptor signaling pathway|G-protein coupled receptor signaling pathway|peripheral nervous system development|integral component of membrane|negative regulation of angiogenesis|calcineurin-NFAT signaling cascade|positive regulation of synapse assembly
hsa-miR-1180-3p	XM_017001910.1	163	-32.04	163	-32.04	82740	22	5232	1569	ADGRB2	GeneID:576,Genbank:XM_011541849.2,HGNC:HGNC:944,MIM:602683	adhesion G protein-coupled receptor B2	GO:0004930,GO:0005813,GO:0005886,GO:0007166,GO:0007186,GO:0007422,GO:0016021,GO:0016525,GO:0033173,GO:0051965	G-protein coupled receptor activity|centrosome|plasma membrane|cell surface receptor signaling pathway|G-protein coupled receptor signaling pathway|peripheral nervous system development|integral component of membrane|negative regulation of angiogenesis|calcineurin-NFAT signaling cascade|positive regulation of synapse assembly
hsa-miR-1180-3p	XM_017001911.1	163	-32.04	163	-32.04	82741	22	5176	1570	ADGRB2	GeneID:576,Genbank:XM_011541849.2,HGNC:HGNC:944,MIM:602683	adhesion G protein-coupled receptor B2	GO:0004930,GO:0005813,GO:0005886,GO:0007166,GO:0007186,GO:0007422,GO:0016021,GO:0016525,GO:0033173,GO:0051965	G-protein coupled receptor activity|centrosome|plasma membrane|cell surface receptor signaling pathway|G-protein coupled receptor signaling pathway|peripheral nervous system development|integral component of membrane|negative regulation of angiogenesis|calcineurin-NFAT signaling cascade|positive regulation of synapse assembly
hsa-miR-1180-3p	XM_017001912.1	163	-32.04	163	-32.04	82742	22	5165	1403	ADGRB2	GeneID:576,Genbank:XM_011541849.2,HGNC:HGNC:944,MIM:602683	adhesion G protein-coupled receptor B2	GO:0004930,GO:0005813,GO:0005886,GO:0007166,GO:0007186,GO:0007422,GO:0016021,GO:0016525,GO:0033173,GO:0051965	G-protein coupled receptor activity|centrosome|plasma membrane|cell surface receptor signaling pathway|G-protein coupled receptor signaling pathway|peripheral nervous system development|integral component of membrane|negative regulation of angiogenesis|calcineurin-NFAT signaling cascade|positive regulation of synapse assembly
hsa-miR-1180-3p	XM_017002641.1	163	-31.38	163	-31.38	83355	22	5532	2390	CFAP74	GeneID:85452,Genbank:NM_001304360.1,HGNC:HGNC:29368	cilia and flagella associated protein 74	GO:0005930,GO:0035082	axoneme|axoneme assembly
hsa-miR-1180-3p	XM_017002642.1	163	-31.38	163	-31.38	83356	22	5502	2390	CFAP74	GeneID:85452,Genbank:NM_001304360.1,HGNC:HGNC:29368	cilia and flagella associated protein 74	GO:0005930,GO:0035082	axoneme|axoneme assembly
hsa-miR-1180-3p	XM_017002643.1	163	-31.38	163	-31.38	83357	22	5528	2390	CFAP74	GeneID:85452,Genbank:NM_001304360.1,HGNC:HGNC:29368	cilia and flagella associated protein 74	GO:0005930,GO:0035082	axoneme|axoneme assembly
hsa-miR-1180-3p	XM_017002718.1	172	-32.31	172	-32.31	83414	22	1831	694	TNFRSF14	GeneID:8764,Genbank:NM_003820.3,HGNC:HGNC:11912,MIM:602746	TNF receptor superfamily member 14			path:hsa04060,path:hsa05168	Cytokine-cytokine receptor interaction|Herpes simplex infection
hsa-miR-1180-3p	XM_017002720.1	172	-32.31	172	-32.31	83415	22	2426	1327	TNFRSF14	GeneID:8764,Genbank:NM_003820.3,HGNC:HGNC:11912,MIM:602746	TNF receptor superfamily member 14			path:hsa04060,path:hsa05168	Cytokine-cytokine receptor interaction|Herpes simplex infection
hsa-miR-1180-3p	XM_017003211.1	162	-30.46	162	-30.46	83806	22	2207	33	RABL2A	GeneID:11159,Genbank:XM_017003211.1,HGNC:HGNC:9799,MIM:605412	RAB, member of RAS oncogene family like 2A	GO:0003924,GO:0005525	GTPase activity|GTP binding
hsa-miR-1180-3p	XM_017003222.1	162	-30.46	162	-30.46	83813	22	2326	14	RABL2A	GeneID:11159,Genbank:XM_017003211.1,HGNC:HGNC:9799,MIM:605412	RAB, member of RAS oncogene family like 2A	GO:0003924,GO:0005525	GTPase activity|GTP binding
hsa-miR-1180-3p	XM_017005685.1	173	-33.01	173	-33.01	85728	22	2609	2186	CCR3	GeneID:1232,Genbank:XM_017005686.1,HGNC:HGNC:1604,MIM:601268	C-C motif chemokine receptor 3			path:hsa04060,path:hsa04062,path:hsa05163,path:hsa05167,path:hsa05203	Cytokine-cytokine receptor interaction|Chemokine signaling pathway|Human cytomegalovirus infection|Kaposi sarcoma-associated herpesvirus infection|Viral carcinogenesis
hsa-miR-1180-3p	XM_017005686.1	173	-33.01	173	-33.01	85729	22	2790	2367	CCR3	GeneID:1232,Genbank:XM_017005686.1,HGNC:HGNC:1604,MIM:601268	C-C motif chemokine receptor 3			path:hsa04060,path:hsa04062,path:hsa05163,path:hsa05167,path:hsa05203	Cytokine-cytokine receptor interaction|Chemokine signaling pathway|Human cytomegalovirus infection|Kaposi sarcoma-associated herpesvirus infection|Viral carcinogenesis
hsa-miR-1180-3p	XM_017005688.1	162	-32.89	162	-32.89	85731	22	9144	1803	COL7A1	GeneID:1294,Genbank:XM_017005688.1,HGNC:HGNC:2214,MIM:120120	collagen type VII alpha 1 chain	GO:0000139,GO:0004867,GO:0005576,GO:0005590,GO:0005604,GO:0005615,GO:0005788,GO:0006888,GO:0007155,GO:0008544,GO:0030134,GO:0030198,GO:0030574,GO:0033116,GO:0035987,GO:0042802,GO:0048208	Golgi membrane|serine-type endopeptidase inhibitor activity|extracellular region|collagen type VII trimer|basement membrane|extracellular space|endoplasmic reticulum lumen|ER to Golgi vesicle-mediated transport|cell adhesion|epidermis development|COPII-coated ER to Golgi transport vesicle|extracellular matrix organization|collagen catabolic process|endoplasmic reticulum-Golgi intermediate compart…	path:hsa04974	Protein digestion and absorption
hsa-miR-1180-3p	XM_017005689.1	162	-32.89	162	-32.89	85732	22	7923	1803	COL7A1	GeneID:1294,Genbank:XM_017005688.1,HGNC:HGNC:2214,MIM:120120	collagen type VII alpha 1 chain	GO:0000139,GO:0004867,GO:0005576,GO:0005590,GO:0005604,GO:0005615,GO:0005788,GO:0006888,GO:0007155,GO:0008544,GO:0030134,GO:0030198,GO:0030574,GO:0033116,GO:0035987,GO:0042802,GO:0048208	Golgi membrane|serine-type endopeptidase inhibitor activity|extracellular region|collagen type VII trimer|basement membrane|extracellular space|endoplasmic reticulum lumen|ER to Golgi vesicle-mediated transport|cell adhesion|epidermis development|COPII-coated ER to Golgi transport vesicle|extracellular matrix organization|collagen catabolic process|endoplasmic reticulum-Golgi intermediate compart…	path:hsa04974	Protein digestion and absorption
hsa-miR-1180-3p	XM_017005690.1	162	-32.89	162	-32.89	85733	22	7509	1803	COL7A1	GeneID:1294,Genbank:XM_017005688.1,HGNC:HGNC:2214,MIM:120120	collagen type VII alpha 1 chain	GO:0000139,GO:0004867,GO:0005576,GO:0005590,GO:0005604,GO:0005615,GO:0005788,GO:0006888,GO:0007155,GO:0008544,GO:0030134,GO:0030198,GO:0030574,GO:0033116,GO:0035987,GO:0042802,GO:0048208	Golgi membrane|serine-type endopeptidase inhibitor activity|extracellular region|collagen type VII trimer|basement membrane|extracellular space|endoplasmic reticulum lumen|ER to Golgi vesicle-mediated transport|cell adhesion|epidermis development|COPII-coated ER to Golgi transport vesicle|extracellular matrix organization|collagen catabolic process|endoplasmic reticulum-Golgi intermediate compart…	path:hsa04974	Protein digestion and absorption
hsa-miR-1180-3p	XM_017005691.1	162	-32.89	162	-32.89	85734	22	7483	1803	COL7A1	GeneID:1294,Genbank:XM_017005688.1,HGNC:HGNC:2214,MIM:120120	collagen type VII alpha 1 chain	GO:0000139,GO:0004867,GO:0005576,GO:0005590,GO:0005604,GO:0005615,GO:0005788,GO:0006888,GO:0007155,GO:0008544,GO:0030134,GO:0030198,GO:0030574,GO:0033116,GO:0035987,GO:0042802,GO:0048208	Golgi membrane|serine-type endopeptidase inhibitor activity|extracellular region|collagen type VII trimer|basement membrane|extracellular space|endoplasmic reticulum lumen|ER to Golgi vesicle-mediated transport|cell adhesion|epidermis development|COPII-coated ER to Golgi transport vesicle|extracellular matrix organization|collagen catabolic process|endoplasmic reticulum-Golgi intermediate compart…	path:hsa04974	Protein digestion and absorption
hsa-miR-1180-3p	XM_017005692.1	162	-32.89	162	-32.89	85735	22	7471	1803	COL7A1	GeneID:1294,Genbank:XM_017005688.1,HGNC:HGNC:2214,MIM:120120	collagen type VII alpha 1 chain	GO:0000139,GO:0004867,GO:0005576,GO:0005590,GO:0005604,GO:0005615,GO:0005788,GO:0006888,GO:0007155,GO:0008544,GO:0030134,GO:0030198,GO:0030574,GO:0033116,GO:0035987,GO:0042802,GO:0048208	Golgi membrane|serine-type endopeptidase inhibitor activity|extracellular region|collagen type VII trimer|basement membrane|extracellular space|endoplasmic reticulum lumen|ER to Golgi vesicle-mediated transport|cell adhesion|epidermis development|COPII-coated ER to Golgi transport vesicle|extracellular matrix organization|collagen catabolic process|endoplasmic reticulum-Golgi intermediate compart…	path:hsa04974	Protein digestion and absorption
hsa-miR-1180-3p	XM_017005783.1	163	-34.71	163	-34.71	85813	22	7109	36	CNTN4	GeneID:152330,Genbank:NM_001350095.1,HGNC:HGNC:2174,MIM:607280	contactin 4	GO:0005576,GO:0005886,GO:0006501,GO:0007158,GO:0007399,GO:0007409,GO:0007411,GO:0007413,GO:0007420,GO:0030424,GO:0031175,GO:0031225,GO:0045665,GO:0048167	extracellular region|plasma membrane|C-terminal protein lipidation|neuron cell-cell adhesion|nervous system development|axonogenesis|axon guidance|axonal fasciculation|brain development|axon|neuron projection development|anchored component of membrane|negative regulation of neuron differentiation|regulation of synaptic plasticity
hsa-miR-1180-3p	XM_017006724.1	167	-35.34	167	-35.34	86557	22	1487	2	SHQ1	GeneID:55164,Genbank:NM_018130.2,HGNC:HGNC:25543,MIM:613663	SHQ1, H/ACA ribonucleoprotein assembly factor	GO:0000493,GO:0005654,GO:0005737,GO:0005829,GO:0022618,GO:0043065,GO:0051082,GO:1904874,GO:2000233	box H/ACA snoRNP assembly|nucleoplasm|cytoplasm|cytosol|ribonucleoprotein complex assembly|positive regulation of apoptotic process|unfolded protein binding|positive regulation of telomerase RNA localization to Cajal body|negative regulation of rRNA processing
hsa-miR-1180-3p	XM_017009995.1	161	-32.52	161	-32.52	89117	22	2342	23	PHYKPL	GeneID:85007,Genbank:NM_153373.3,HGNC:HGNC:28249,MIM:614683	5-phosphohydroxy-L-lysine phospho-lyase	GO:0005739,GO:0005759,GO:0006554,GO:0008453,GO:0016829,GO:0030170,GO:0030574,GO:0042802	mitochondrion|mitochondrial matrix|lysine catabolic process|alanine-glyoxylate transaminase activity|lyase activity|pyridoxal phosphate binding|collagen catabolic process|identical protein binding	path:hsa00310	Lysine degradation
hsa-miR-1180-3p	XM_017010073.2	158	-31.92	158	-31.92	89171	22	2533	43	RNF14	GeneID:9604,Genbank:XM_024446265.1,HGNC:HGNC:10058,MIM:605675	ring finger protein 14	GO:0000151,GO:0000209,GO:0003713,GO:0005634,GO:0005737,GO:0005829,GO:0006351,GO:0006355,GO:0006357,GO:0007165,GO:0016567,GO:0019787,GO:0030521,GO:0031624,GO:0032436,GO:0042787,GO:0045893,GO:0046872,GO:0050681,GO:0060765,GO:0061630	ubiquitin ligase complex|protein polyubiquitination|transcription coactivator activity|nucleus|cytoplasm|cytosol|transcription, DNA-templated|regulation of transcription, DNA-templated|regulation of transcription from RNA polymerase II promoter|signal transduction|protein ubiquitination|ubiquitin-like protein transferase activity|androgen receptor signaling pathway|ubiquitin conjugating enzyme bi…
hsa-miR-1180-3p	XM_017010598.2	169	-33.52	169	-33.52	89592	22	8432	770	SASH1	GeneID:23328,Genbank:XM_017010599.1,HGNC:HGNC:19182,MIM:607955	SAM and SH3 domain containing 1	GO:0000209,GO:0008022,GO:0010595,GO:0019901,GO:0031435,GO:0031666,GO:0032947,GO:0043234,GO:0043507,GO:0045766,GO:1900044,GO:1900745,GO:1901224,GO:1902498	protein polyubiquitination|protein C-terminus binding|positive regulation of endothelial cell migration|protein kinase binding|mitogen-activated protein kinase kinase kinase binding|positive regulation of lipopolysaccharide-mediated signaling pathway|protein complex scaffold activity|protein complex|positive regulation of JUN kinase activity|positive regulation of angiogenesis|regulation of prote…
hsa-miR-1180-3p	XM_017012363.2	159	-30.44	159	-30.44	90982	22	5668	11	RNF216	GeneID:54476,Genbank:NM_207116.2,HGNC:HGNC:21698,MIM:609948	ring finger protein 216	GO:0005634,GO:0005654,GO:0005829,GO:0006915,GO:0016032,GO:0032480,GO:0032648,GO:0043161,GO:0046872,GO:0050691,GO:0061630,GO:0070936	nucleus|nucleoplasm|cytosol|apoptotic process|viral process|negative regulation of type I interferon production|regulation of interferon-beta production|proteasome-mediated ubiquitin-dependent protein catabolic process|metal ion binding|regulation of defense response to virus by host|ubiquitin protein ligase activity|protein K48-linked ubiquitination
hsa-miR-1180-3p	XM_017012364.2	159	-30.44	159	-30.44	90983	22	2414	52	RNF216	GeneID:54476,Genbank:NM_207116.2,HGNC:HGNC:21698,MIM:609948	ring finger protein 216	GO:0005634,GO:0005654,GO:0005829,GO:0006915,GO:0016032,GO:0032480,GO:0032648,GO:0043161,GO:0046872,GO:0050691,GO:0061630,GO:0070936	nucleus|nucleoplasm|cytosol|apoptotic process|viral process|negative regulation of type I interferon production|regulation of interferon-beta production|proteasome-mediated ubiquitin-dependent protein catabolic process|metal ion binding|regulation of defense response to virus by host|ubiquitin protein ligase activity|protein K48-linked ubiquitination
hsa-miR-1180-3p	XM_017012537.1	165	-34.27	165	-34.27	91126	22	7588	89	TNS3	GeneID:64759,Genbank:XM_011515477.2,HGNC:HGNC:21616,MIM:606825	tensin 3	GO:0005829,GO:0005925,GO:0008284,GO:0016477,GO:0048286	cytosol|focal adhesion|positive regulation of cell proliferation|cell migration|lung alveolus development
hsa-miR-1180-3p	XM_017012538.1	172	-32.92	172	-32.92	91127	22	7895	357	TNS3	GeneID:64759,Genbank:XM_011515477.2,HGNC:HGNC:21616,MIM:606825	tensin 3	GO:0005829,GO:0005925,GO:0008284,GO:0016477,GO:0048286	cytosol|focal adhesion|positive regulation of cell proliferation|cell migration|lung alveolus development
hsa-miR-1180-3p	XM_017013022.1	159	-31.1	159	-31.1	91495	22	4677	1641	VPS37A	GeneID:137492,Genbank:NM_152415.2,HGNC:HGNC:24928,MIM:609927	VPS37A, ESCRT-I subunit	GO:0000813,GO:0005654,GO:0005813,GO:0005829,GO:0010008,GO:0015031,GO:0016197,GO:0016236,GO:0019058,GO:0031902,GO:0036258,GO:0039702,GO:0043162,GO:0043231,GO:0043657,GO:0075733	ESCRT I complex|nucleoplasm|centrosome|cytosol|endosome membrane|protein transport|endosomal transport|macroautophagy|viral life cycle|late endosome membrane|multivesicular body assembly|viral budding via host ESCRT complex|ubiquitin-dependent protein catabolic process via the multivesicular body sorting pathway|intracellular membrane-bounded organelle|host cell|intracellular transport of virus	path:hsa04144	Endocytosis
hsa-miR-1180-3p	XM_017013025.1	159	-31.1	159	-31.1	91498	22	4802	1668	VPS37A	GeneID:137492,Genbank:NM_152415.2,HGNC:HGNC:24928,MIM:609927	VPS37A, ESCRT-I subunit	GO:0000813,GO:0005654,GO:0005813,GO:0005829,GO:0010008,GO:0015031,GO:0016197,GO:0016236,GO:0019058,GO:0031902,GO:0036258,GO:0039702,GO:0043162,GO:0043231,GO:0043657,GO:0075733	ESCRT I complex|nucleoplasm|centrosome|cytosol|endosome membrane|protein transport|endosomal transport|macroautophagy|viral life cycle|late endosome membrane|multivesicular body assembly|viral budding via host ESCRT complex|ubiquitin-dependent protein catabolic process via the multivesicular body sorting pathway|intracellular membrane-bounded organelle|host cell|intracellular transport of virus	path:hsa04144	Endocytosis
hsa-miR-1180-3p	XM_017013135.1	1727	-373.67	157	-33.97	91564	22	7671	2422 2465 2508 2551 2637 2723 2852 2895 2938 2981 3196	ERICH1	GeneID:157697,Genbank:NM_001303100.1,HGNC:HGNC:27234	glutamate rich 1
hsa-miR-1180-3p	XM_017013136.1	1727	-373.67	157	-33.97	91565	22	7674	2425 2468 2511 2554 2640 2726 2855 2898 2941 2984 3199	ERICH1	GeneID:157697,Genbank:NM_001303100.1,HGNC:HGNC:27234	glutamate rich 1
hsa-miR-1180-3p	XM_017013137.1	1727	-373.67	157	-33.97	91566	22	7704	2455 2498 2541 2584 2670 2756 2885 2928 2971 3014 3229	ERICH1	GeneID:157697,Genbank:NM_001303100.1,HGNC:HGNC:27234	glutamate rich 1
hsa-miR-1180-3p	XM_017013138.1	1727	-373.67	157	-33.97	91567	22	7649	2400 2443 2486 2529 2615 2701 2830 2873 2916 2959 3174	ERICH1	GeneID:157697,Genbank:NM_001303100.1,HGNC:HGNC:27234	glutamate rich 1
hsa-miR-1180-3p	XM_017013139.1	1727	-373.67	157	-33.97	91568	22	7646	2397 2440 2483 2526 2612 2698 2827 2870 2913 2956 3171	ERICH1	GeneID:157697,Genbank:NM_001303100.1,HGNC:HGNC:27234	glutamate rich 1
hsa-miR-1180-3p	XM_017013319.2	161	-34.22	161	-34.22	91716	22	8468	1953	ANK1	GeneID:286,Genbank:NM_001142446.1,HGNC:HGNC:492,MIM:612641	ankyrin 1			path:hsa05205	Proteoglycans in cancer
hsa-miR-1180-3p	XM_017013320.2	161	-34.22	161	-34.22	91717	22	8488	1955	ANK1	GeneID:286,Genbank:NM_001142446.1,HGNC:HGNC:492,MIM:612641	ankyrin 1			path:hsa05205	Proteoglycans in cancer
hsa-miR-1180-3p	XM_017013321.1	161	-34.22	161	-34.22	91718	22	8441	1902	ANK1	GeneID:286,Genbank:NM_001142446.1,HGNC:HGNC:492,MIM:612641	ankyrin 1			path:hsa05205	Proteoglycans in cancer
hsa-miR-1180-3p	XM_017013322.1	161	-34.22	161	-34.22	91719	22	8403	1864	ANK1	GeneID:286,Genbank:NM_001142446.1,HGNC:HGNC:492,MIM:612641	ankyrin 1			path:hsa05205	Proteoglycans in cancer
hsa-miR-1180-3p	XM_017013323.1	161	-34.22	161	-34.22	91720	22	8417	1878	ANK1	GeneID:286,Genbank:NM_001142446.1,HGNC:HGNC:492,MIM:612641	ankyrin 1			path:hsa05205	Proteoglycans in cancer
hsa-miR-1180-3p	XM_017013324.1	161	-34.22	161	-34.22	91721	22	8530	2036	ANK1	GeneID:286,Genbank:NM_001142446.1,HGNC:HGNC:492,MIM:612641	ankyrin 1			path:hsa05205	Proteoglycans in cancer
hsa-miR-1180-3p	XM_017013325.1	161	-34.22	161	-34.22	91722	22	8342	1803	ANK1	GeneID:286,Genbank:NM_001142446.1,HGNC:HGNC:492,MIM:612641	ankyrin 1			path:hsa05205	Proteoglycans in cancer
hsa-miR-1180-3p	XM_017013326.1	161	-34.22	161	-34.22	91723	22	8350	1796	ANK1	GeneID:286,Genbank:NM_001142446.1,HGNC:HGNC:492,MIM:612641	ankyrin 1			path:hsa05205	Proteoglycans in cancer
hsa-miR-1180-3p	XM_017013327.2	161	-34.22	161	-34.22	91724	22	8006	1953	ANK1	GeneID:286,Genbank:NM_001142446.1,HGNC:HGNC:492,MIM:612641	ankyrin 1			path:hsa05205	Proteoglycans in cancer
hsa-miR-1180-3p	XM_017013328.2	161	-34.22	161	-34.22	91725	22	7960	1952	ANK1	GeneID:286,Genbank:NM_001142446.1,HGNC:HGNC:492,MIM:612641	ankyrin 1			path:hsa05205	Proteoglycans in cancer
hsa-miR-1180-3p	XM_017013329.1	161	-34.22	161	-34.22	91726	22	8102	2034	ANK1	GeneID:286,Genbank:NM_001142446.1,HGNC:HGNC:492,MIM:612641	ankyrin 1			path:hsa05205	Proteoglycans in cancer
hsa-miR-1180-3p	XM_017014227.2	167	-36.28	167	-36.28	92347	22	5638	19	CNTRL	GeneID:11064,Genbank:XM_017014227.2,HGNC:HGNC:1858,MIM:605496	centriolin	GO:0000086,GO:0004713,GO:0005813,GO:0005829,GO:0010389,GO:0016020,GO:0051301,GO:0090543,GO:0097711,GO:0120103	G2/M transition of mitotic cell cycle|protein tyrosine kinase activity|centrosome|cytosol|regulation of G2/M transition of mitotic cell cycle|membrane|cell division|Flemming body|ciliary basal body-plasma membrane docking|centriolar subdistal appendage
hsa-miR-1180-3p	XM_017014543.2	161	-32.53	161	-32.53	92562	22	2081	1407	PMPCA	GeneID:23203,Genbank:NM_015160.2,HGNC:HGNC:18667,MIM:613036	peptidase, mitochondrial processing alpha subunit	GO:0004222,GO:0005615,GO:0005739,GO:0005743,GO:0005759,GO:0006508,GO:0006627,GO:0006851,GO:0008270	metalloendopeptidase activity|extracellular space|mitochondrion|mitochondrial inner membrane|mitochondrial matrix|proteolysis|protein processing involved in protein targeting to mitochondrion|mitochondrial calcium ion transmembrane transport|zinc ion binding
hsa-miR-1180-3p	XM_017016196.1	167	-34.3	167	-34.3	93805	22	1121	907	IL15RA	GeneID:3601,Genbank:XM_011519471.2,HGNC:HGNC:5978,MIM:601070	interleukin 15 receptor subunit alpha			path:hsa04060,path:hsa04630,path:hsa04672,path:hsa05166,path:hsa05200	Cytokine-cytokine receptor interaction|Jak-STAT signaling pathway|Intestinal immune network for IgA production|Human T-cell leukemia virus 1 infection|Pathways in cancer
hsa-miR-1180-3p	XM_017016197.2	167	-34.3	167	-34.3	93806	22	1134	920	IL15RA	GeneID:3601,Genbank:XM_011519471.2,HGNC:HGNC:5978,MIM:601070	interleukin 15 receptor subunit alpha			path:hsa04060,path:hsa04630,path:hsa04672,path:hsa05166,path:hsa05200	Cytokine-cytokine receptor interaction|Jak-STAT signaling pathway|Intestinal immune network for IgA production|Human T-cell leukemia virus 1 infection|Pathways in cancer
hsa-miR-1180-3p	XM_017016200.2	167	-34.3	167	-34.3	93809	22	1433	1219	IL15RA	GeneID:3601,Genbank:XM_011519471.2,HGNC:HGNC:5978,MIM:601070	interleukin 15 receptor subunit alpha			path:hsa04060,path:hsa04630,path:hsa04672,path:hsa05166,path:hsa05200	Cytokine-cytokine receptor interaction|Jak-STAT signaling pathway|Intestinal immune network for IgA production|Human T-cell leukemia virus 1 infection|Pathways in cancer
hsa-miR-1180-3p	XM_017016333.2	170	-30.36	170	-30.36	93905	22	3452	537	PANK1	GeneID:53354,Genbank:NM_148977.2,HGNC:HGNC:8598,MIM:606160	pantothenate kinase 1	GO:0004594,GO:0005524,GO:0005634,GO:0005829,GO:0009108,GO:0015937,GO:0030118,GO:0055037,GO:0071944	pantothenate kinase activity|ATP binding|nucleus|cytosol|coenzyme biosynthetic process|coenzyme A biosynthetic process|clathrin coat|recycling endosome|cell periphery	path:hsa00770	Pantothenate and CoA biosynthesis
hsa-miR-1180-3p	XM_017016334.1	170	-30.36	170	-30.36	93906	22	3415	536	PANK1	GeneID:53354,Genbank:NM_148977.2,HGNC:HGNC:8598,MIM:606160	pantothenate kinase 1	GO:0004594,GO:0005524,GO:0005634,GO:0005829,GO:0009108,GO:0015937,GO:0030118,GO:0055037,GO:0071944	pantothenate kinase activity|ATP binding|nucleus|cytosol|coenzyme biosynthetic process|coenzyme A biosynthetic process|clathrin coat|recycling endosome|cell periphery	path:hsa00770	Pantothenate and CoA biosynthesis
hsa-miR-1180-3p	XM_017016335.1	170	-30.36	170	-30.36	93907	22	4243	534	PANK1	GeneID:53354,Genbank:NM_148977.2,HGNC:HGNC:8598,MIM:606160	pantothenate kinase 1	GO:0004594,GO:0005524,GO:0005634,GO:0005829,GO:0009108,GO:0015937,GO:0030118,GO:0055037,GO:0071944	pantothenate kinase activity|ATP binding|nucleus|cytosol|coenzyme biosynthetic process|coenzyme A biosynthetic process|clathrin coat|recycling endosome|cell periphery	path:hsa00770	Pantothenate and CoA biosynthesis
hsa-miR-1180-3p	XM_017017144.2	163	-37	163	-37	94505	22	2861	2438	SF3B2	GeneID:10992,Genbank:NM_006842.2,HGNC:HGNC:10769,MIM:605591	splicing factor 3b subunit 2	GO:0000398,GO:0003723,GO:0005654,GO:0005681,GO:0005684,GO:0005686,GO:0005689,GO:0006397,GO:0008380,GO:0016032,GO:0016607,GO:0071011,GO:0071013	mRNA splicing, via spliceosome|RNA binding|nucleoplasm|spliceosomal complex|U2-type spliceosomal complex|U2 snRNP|U12-type spliceosomal complex|mRNA processing|RNA splicing|viral process|nuclear speck|precatalytic spliceosome|catalytic step 2 spliceosome	path:hsa03040	Spliceosome
hsa-miR-1180-3p	XM_017017837.1	166	-32.56	166	-32.56	95036	22	3676	1115	OVOL1	GeneID:5017,Genbank:NM_004561.3,HGNC:HGNC:8525,MIM:602313	ovo like transcriptional repressor 1	GO:0000978,GO:0000981,GO:0001078,GO:0001822,GO:0005634,GO:0006351,GO:0007283,GO:0007498,GO:0008544,GO:0043588,GO:0046872,GO:0051729,GO:1901994,GO:2000647	RNA polymerase II proximal promoter sequence-specific DNA binding|RNA polymerase II transcription factor activity, sequence-specific DNA binding|transcriptional repressor activity, RNA polymerase II proximal promoter sequence-specific DNA binding|kidney development|nucleus|transcription, DNA-templated|spermatogenesis|mesoderm development|epidermis development|skin development|metal ion binding|ge…
hsa-miR-1180-3p	XM_017017838.2	166	-32.56	166	-32.56	95037	22	2657	96	OVOL1	GeneID:5017,Genbank:NM_004561.3,HGNC:HGNC:8525,MIM:602313	ovo like transcriptional repressor 1	GO:0000978,GO:0000981,GO:0001078,GO:0001822,GO:0005634,GO:0006351,GO:0007283,GO:0007498,GO:0008544,GO:0043588,GO:0046872,GO:0051729,GO:1901994,GO:2000647	RNA polymerase II proximal promoter sequence-specific DNA binding|RNA polymerase II transcription factor activity, sequence-specific DNA binding|transcriptional repressor activity, RNA polymerase II proximal promoter sequence-specific DNA binding|kidney development|nucleus|transcription, DNA-templated|spermatogenesis|mesoderm development|epidermis development|skin development|metal ion binding|ge…
hsa-miR-1180-3p	XM_017018671.2	172	-33.99	172	-33.99	95665	22	5753	736	PLXNC1	GeneID:10154,Genbank:NM_005761.2,HGNC:HGNC:9106,MIM:604259	plexin C1	GO:0005102,GO:0005886,GO:0007155,GO:0007162,GO:0008360,GO:0016020,GO:0016021,GO:0017154,GO:0043087,GO:0050772	receptor binding|plasma membrane|cell adhesion|negative regulation of cell adhesion|regulation of cell shape|membrane|integral component of membrane|semaphorin receptor activity|regulation of GTPase activity|positive regulation of axonogenesis	path:hsa04360	Axon guidance
hsa-miR-1180-3p	XM_017018672.2	172	-33.99	172	-33.99	95666	22	5064	736	PLXNC1	GeneID:10154,Genbank:NM_005761.2,HGNC:HGNC:9106,MIM:604259	plexin C1	GO:0005102,GO:0005886,GO:0007155,GO:0007162,GO:0008360,GO:0016020,GO:0016021,GO:0017154,GO:0043087,GO:0050772	receptor binding|plasma membrane|cell adhesion|negative regulation of cell adhesion|regulation of cell shape|membrane|integral component of membrane|semaphorin receptor activity|regulation of GTPase activity|positive regulation of axonogenesis	path:hsa04360	Axon guidance
hsa-miR-1180-3p	XM_017018801.2	166	-30.92	166	-30.92	95772	22	3492	8	NEDD1	GeneID:121441,Genbank:XM_017018801.2,HGNC:HGNC:7723,MIM:600372	neural precursor cell expressed, developmentally down-regulated 1	GO:0000086,GO:0000242,GO:0000922,GO:0005813,GO:0005814,GO:0005829,GO:0010389,GO:0036064,GO:0045177,GO:0051301,GO:0071539,GO:0097711	G2/M transition of mitotic cell cycle|pericentriolar material|spindle pole|centrosome|centriole|cytosol|regulation of G2/M transition of mitotic cell cycle|ciliary basal body|apical part of cell|cell division|protein localization to centrosome|ciliary basal body-plasma membrane docking
hsa-miR-1180-3p	XM_017018802.2	166	-30.92	166	-30.92	95773	22	3487	8	NEDD1	GeneID:121441,Genbank:XM_017018801.2,HGNC:HGNC:7723,MIM:600372	neural precursor cell expressed, developmentally down-regulated 1	GO:0000086,GO:0000242,GO:0000922,GO:0005813,GO:0005814,GO:0005829,GO:0010389,GO:0036064,GO:0045177,GO:0051301,GO:0071539,GO:0097711	G2/M transition of mitotic cell cycle|pericentriolar material|spindle pole|centrosome|centriole|cytosol|regulation of G2/M transition of mitotic cell cycle|ciliary basal body|apical part of cell|cell division|protein localization to centrosome|ciliary basal body-plasma membrane docking
hsa-miR-1180-3p	XM_017018941.1	163	-33.52	163	-33.52	95887	22	3266	861	ZNF384	GeneID:171017,Genbank:NM_001039920.2,HGNC:HGNC:11955,MIM:609951	zinc finger protein 384
hsa-miR-1180-3p	XM_017018942.2	163	-33.52	163	-33.52	95888	22	3126	721	ZNF384	GeneID:171017,Genbank:NM_001039920.2,HGNC:HGNC:11955,MIM:609951	zinc finger protein 384
hsa-miR-1180-3p	XM_017018943.1	163	-33.52	163	-33.52	95889	22	3126	721	ZNF384	GeneID:171017,Genbank:NM_001039920.2,HGNC:HGNC:11955,MIM:609951	zinc finger protein 384
hsa-miR-1180-3p	XM_017018944.1	163	-33.52	163	-33.52	95890	22	3193	788	ZNF384	GeneID:171017,Genbank:NM_001039920.2,HGNC:HGNC:11955,MIM:609951	zinc finger protein 384
hsa-miR-1180-3p	XM_017018945.1	163	-33.52	163	-33.52	95891	22	3218	813	ZNF384	GeneID:171017,Genbank:NM_001039920.2,HGNC:HGNC:11955,MIM:609951	zinc finger protein 384
hsa-miR-1180-3p	XM_017018946.1	163	-33.52	163	-33.52	95892	22	3176	861	ZNF384	GeneID:171017,Genbank:NM_001039920.2,HGNC:HGNC:11955,MIM:609951	zinc finger protein 384
hsa-miR-1180-3p	XM_017018947.2	163	-33.52	163	-33.52	95893	22	3187	872	ZNF384	GeneID:171017,Genbank:NM_001039920.2,HGNC:HGNC:11955,MIM:609951	zinc finger protein 384
hsa-miR-1180-3p	XM_017018948.2	163	-33.52	163	-33.52	95894	22	3659	1344	ZNF384	GeneID:171017,Genbank:NM_001039920.2,HGNC:HGNC:11955,MIM:609951	zinc finger protein 384
hsa-miR-1180-3p	XM_017018949.1	163	-33.52	163	-33.52	95895	22	3058	836	ZNF384	GeneID:171017,Genbank:NM_001039920.2,HGNC:HGNC:11955,MIM:609951	zinc finger protein 384
hsa-miR-1180-3p	XM_017018950.2	163	-33.52	163	-33.52	95896	22	3094	872	ZNF384	GeneID:171017,Genbank:NM_001039920.2,HGNC:HGNC:11955,MIM:609951	zinc finger protein 384
hsa-miR-1180-3p	XM_017018951.1	163	-33.52	163	-33.52	95897	22	3010	788	ZNF384	GeneID:171017,Genbank:NM_001039920.2,HGNC:HGNC:11955,MIM:609951	zinc finger protein 384
hsa-miR-1180-3p	XM_017018952.1	163	-33.52	163	-33.52	95898	22	3035	813	ZNF384	GeneID:171017,Genbank:NM_001039920.2,HGNC:HGNC:11955,MIM:609951	zinc finger protein 384
hsa-miR-1180-3p	XM_017018953.2	163	-33.52	163	-33.52	95899	22	3046	824	ZNF384	GeneID:171017,Genbank:NM_001039920.2,HGNC:HGNC:11955,MIM:609951	zinc finger protein 384
hsa-miR-1180-3p	XM_017018954.2	163	-33.52	163	-33.52	95900	22	3888	1483	ZNF384	GeneID:171017,Genbank:NM_001039920.2,HGNC:HGNC:11955,MIM:609951	zinc finger protein 384
hsa-miR-1180-3p	XM_017019407.2	164	-37.15	164	-37.15	96246	22	3665	253	CDK17	GeneID:5128,Genbank:NM_002595.4,HGNC:HGNC:8750,MIM:603440	cyclin dependent kinase 17	GO:0004672,GO:0004674,GO:0005524,GO:0005634,GO:0005737,GO:0006468	protein kinase activity|protein serine/threonine kinase activity|ATP binding|nucleus|cytoplasm|protein phosphorylation
hsa-miR-1180-3p	XM_017019449.1	163	-30.08	163	-30.08	96286	22	3676	13	PPHLN1	GeneID:51535,Genbank:XM_017019449.1,HGNC:HGNC:19369,MIM:608150	periphilin 1	GO:0003723,GO:0005654,GO:0005694,GO:0005794,GO:0005829,GO:0006351,GO:0031424,GO:0045892	RNA binding|nucleoplasm|chromosome|Golgi apparatus|cytosol|transcription, DNA-templated|keratinization|negative regulation of transcription, DNA-templated
hsa-miR-1180-3p	XM_017019450.1	163	-30.08	163	-30.08	96287	22	1608	13	PPHLN1	GeneID:51535,Genbank:XM_017019449.1,HGNC:HGNC:19369,MIM:608150	periphilin 1	GO:0003723,GO:0005654,GO:0005694,GO:0005794,GO:0005829,GO:0006351,GO:0031424,GO:0045892	RNA binding|nucleoplasm|chromosome|Golgi apparatus|cytosol|transcription, DNA-templated|keratinization|negative regulation of transcription, DNA-templated
hsa-miR-1180-3p	XM_017020755.2	159	-35.62	159	-35.62	97300	22	3385	10	GRTP1	GeneID:79774,Genbank:XM_017020755.2,HGNC:HGNC:20310	growth hormone regulated TBC protein 1	GO:0005096,GO:0005622,GO:0006886,GO:0012505,GO:0017137,GO:0031338,GO:0090630	GTPase activator activity|intracellular|intracellular protein transport|endomembrane system|Rab GTPase binding|regulation of vesicle fusion|activation of GTPase activity
hsa-miR-1180-3p	XM_017020907.2	1440	-276.03	160	-30.99	97407	22	4206	2696 2736 2896 2936 2976 3056 3096 3176 3336	LOC105377805	GeneID:105377805,Genbank:XM_017020908.2	basic salivary proline-rich protein 4-like
hsa-miR-1180-3p	XM_017020908.2	1440	-276.03	160	-30.99	97408	22	6002	2702 2742 2902 2942 2982 3062 3102 3182 3342	LOC105377805	GeneID:105377805,Genbank:XM_017020908.2	basic salivary proline-rich protein 4-like
hsa-miR-1180-3p	XM_017022859.1	165	-31.79	165	-31.79	98902	22	1559	787	BCKDK	GeneID:10295,Genbank:NM_001122957.2,HGNC:HGNC:16902,MIM:614901	branched chain ketoacid dehydrogenase kinase
hsa-miR-1180-3p	XM_017022975.1	160	-32.73	160	-32.73	98998	22	2562	52	C16orf71	GeneID:146562,Genbank:NM_139170.2,HGNC:HGNC:25081	chromosome 16 open reading frame 71
hsa-miR-1180-3p	XM_017023210.2	175	-34.51	175	-34.51	99203	22	1711	1620	CTU2	GeneID:348180,Genbank:NM_001318507.1,HGNC:HGNC:28005,MIM:617057	cytosolic thiouridylase subunit 2	GO:0000049,GO:0002098,GO:0002143,GO:0005829,GO:0006400,GO:0016783,GO:0034227,GO:0043234	tRNA binding|tRNA wobble uridine modification|tRNA wobble position uridine thiolation|cytosol|tRNA modification|sulfurtransferase activity|tRNA thio-modification|protein complex	path:hsa04122	Sulfur relay system
hsa-miR-1180-3p	XM_017023595.1	163	-35.42	163	-35.42	99526	22	1111	574	MRPS34	GeneID:65993,Genbank:XM_017023595.1,HGNC:HGNC:16618,MIM:611994	mitochondrial ribosomal protein S34	GO:0003735,GO:0005739,GO:0005743,GO:0005763,GO:0032543,GO:0070125,GO:0070126	structural constituent of ribosome|mitochondrion|mitochondrial inner membrane|mitochondrial small ribosomal subunit|mitochondrial translation|mitochondrial translational elongation|mitochondrial translational termination
hsa-miR-1180-3p	XM_017023784.1	169	-30.93	169	-30.93	99671	22	14433	1899	ZNF469	GeneID:84627,Genbank:XM_017023785.1,HGNC:HGNC:23216,MIM:612078	zinc finger protein 469	GO:0003677,GO:0005634,GO:0006351,GO:0006355,GO:0046872	DNA binding|nucleus|transcription, DNA-templated|regulation of transcription, DNA-templated|metal ion binding
hsa-miR-1180-3p	XM_017023785.1	169	-30.93	169	-30.93	99672	22	13476	942	ZNF469	GeneID:84627,Genbank:XM_017023785.1,HGNC:HGNC:23216,MIM:612078	zinc finger protein 469	GO:0003677,GO:0005634,GO:0006351,GO:0006355,GO:0046872	DNA binding|nucleus|transcription, DNA-templated|regulation of transcription, DNA-templated|metal ion binding
hsa-miR-1180-3p	XM_017023804.1	167	-32.04	167	-32.04	99691	22	18635	2637	NKD1	GeneID:85407,Genbank:NM_033119.4,HGNC:HGNC:17045,MIM:607851	naked cuticle homolog 1	GO:0001754,GO:0005509,GO:0005737,GO:0005886,GO:0007525,GO:0016055,GO:0030165,GO:0045732,GO:0090090,GO:0090249,GO:1901231,GO:1901233,GO:2000096	eye photoreceptor cell differentiation|calcium ion binding|cytoplasm|plasma membrane|somatic muscle development|Wnt signaling pathway|PDZ domain binding|positive regulation of protein catabolic process|negative regulation of canonical Wnt signaling pathway|regulation of cell motility involved in somitogenic axis elongation|positive regulation of non-canonical Wnt signaling pathway via JNK cascade…	path:hsa04310,path:hsa04390	Wnt signaling pathway|Hippo signaling pathway
hsa-miR-1180-3p	XM_017024073.1	171	-30.34	171	-30.34	99915	22	1030	534	SAT2	GeneID:112483,Genbank:XM_017024074.1,HGNC:HGNC:23160,MIM:611463	spermidine/spermine N1-acetyltransferase family member 2	GO:0004145,GO:0005737,GO:0009447,GO:0032918,GO:0032919,GO:0032920,GO:0042802,GO:0046204,GO:0070062	diamine N-acetyltransferase activity|cytoplasm|putrescine catabolic process|spermidine acetylation|spermine acetylation|putrescine acetylation|identical protein binding|nor-spermidine metabolic process|extracellular exosome	path:hsa00330,path:hsa04216	Arginine and proline metabolism|Ferroptosis
hsa-miR-1180-3p	XM_017024322.2	166	-35.08	166	-35.08	100116	22	3600	1364	SAMD14	GeneID:201191,Genbank:NM_001257359.1,HGNC:HGNC:27312	sterile alpha motif domain containing 14
hsa-miR-1180-3p	XM_017024323.2	166	-35.08	166	-35.08	100117	22	3383	1147	SAMD14	GeneID:201191,Genbank:NM_001257359.1,HGNC:HGNC:27312	sterile alpha motif domain containing 14
hsa-miR-1180-3p	XM_017024324.2	166	-35.08	166	-35.08	100118	22	4166	1846	SAMD14	GeneID:201191,Genbank:NM_001257359.1,HGNC:HGNC:27312	sterile alpha motif domain containing 14
hsa-miR-1180-3p	XM_017024446.1	152	-30.1	152	-30.1	100223	22	2096	33	GCGR	GeneID:2642,Genbank:XM_017024446.1,HGNC:HGNC:4192,MIM:138033	glucagon receptor	GO:0004967,GO:0005085,GO:0005768,GO:0005886,GO:0005887,GO:0006091,GO:0006887,GO:0007166,GO:0007186,GO:0007188,GO:0007189,GO:0007584,GO:0008217,GO:0009755,GO:0016021,GO:0017046,GO:0042593,GO:0042594,GO:0070873,GO:0071377	glucagon receptor activity|guanyl-nucleotide exchange factor activity|endosome|plasma membrane|integral component of plasma membrane|generation of precursor metabolites and energy|exocytosis|cell surface receptor signaling pathway|G-protein coupled receptor signaling pathway|adenylate cyclase-modulating G-protein coupled receptor signaling pathway|adenylate cyclase-activating G-protein coupled re…	path:hsa04080,path:hsa04922	Neuroactive ligand-receptor interaction|Glucagon signaling pathway
hsa-miR-1180-3p	XM_017024619.1	162	-30.22	162	-30.22	100352	22	2578	324	LRRC75A	GeneID:388341,Genbank:NM_207387.3,HGNC:HGNC:32403	leucine rich repeat containing 75A
hsa-miR-1180-3p	XM_017024620.1	162	-30.22	162	-30.22	100353	22	2741	487	LRRC75A	GeneID:388341,Genbank:NM_207387.3,HGNC:HGNC:32403	leucine rich repeat containing 75A
hsa-miR-1180-3p	XM_017024782.1	162	-31.24	162	-31.24	100480	22	5892	8	MBTD1	GeneID:54799,Genbank:XM_011524928.2,HGNC:HGNC:19866	mbt domain containing 1	GO:0005634,GO:0006351,GO:0006355,GO:0008270,GO:0016569,GO:0035064,GO:0048706	nucleus|transcription, DNA-templated|regulation of transcription, DNA-templated|zinc ion binding|covalent chromatin modification|methylated histone binding|embryonic skeletal system development
hsa-miR-1180-3p	XM_017025079.1	162	-30.96	162	-30.96	100703	22	3879	700	RHBDF2	GeneID:79651,Genbank:XM_011525250.2,HGNC:HGNC:20788,MIM:614404	rhomboid 5 homolog 2	GO:0005789,GO:0005886,GO:0006508,GO:0015031,GO:0016021,GO:0019838,GO:0042058,GO:0050708,GO:0050709	endoplasmic reticulum membrane|plasma membrane|proteolysis|protein transport|integral component of membrane|growth factor binding|regulation of epidermal growth factor receptor signaling pathway|regulation of protein secretion|negative regulation of protein secretion
hsa-miR-1180-3p	XM_017025492.2	162	-33.93	162	-33.93	101051	22	1171	273	LOC105371932	GeneID:105371932,Genbank:XM_017025492.2	uncharacterized LOC105371932
hsa-miR-1180-3p	XM_017026290.1	168	-31.25	168	-31.25	101709	22	1274	114	FBXO27	GeneID:126433,Genbank:XM_017026290.1,HGNC:HGNC:18753,MIM:609099	F-box protein 27	GO:0000209,GO:0004842,GO:0005829,GO:0019005,GO:0043687	protein polyubiquitination|ubiquitin-protein transferase activity|cytosol|SCF ubiquitin ligase complex|post-translational protein modification
hsa-miR-1180-3p	XM_017027065.1	157	-31.84	157	-31.84	102306	22	7293	2090	PTPRS	GeneID:5802,Genbank:XM_017027066.1,HGNC:HGNC:9681,MIM:601576	protein tyrosine phosphatase, receptor type S	GO:0004721,GO:0004725,GO:0005886,GO:0005887,GO:0006470,GO:0007155,GO:0008201,GO:0010977,GO:0021510,GO:0021549,GO:0021766,GO:0021987,GO:0022038,GO:0030054,GO:0030285,GO:0030424,GO:0030517,GO:0032687,GO:0032688,GO:0034164,GO:0035335,GO:0035374,GO:0043204,GO:0043395,GO:0048671,GO:0048681,GO:0061000,GO:0070062,GO:0090557,GO:0099061	phosphoprotein phosphatase activity|protein tyrosine phosphatase activity|plasma membrane|integral component of plasma membrane|protein dephosphorylation|cell adhesion|heparin binding|negative regulation of neuron projection development|spinal cord development|cerebellum development|hippocampus development|cerebral cortex development|corpus callosum development|cell junction|integral component of…
hsa-miR-1180-3p	XM_017027066.1	157	-31.84	157	-31.84	102307	22	7311	2108	PTPRS	GeneID:5802,Genbank:XM_017027066.1,HGNC:HGNC:9681,MIM:601576	protein tyrosine phosphatase, receptor type S	GO:0004721,GO:0004725,GO:0005886,GO:0005887,GO:0006470,GO:0007155,GO:0008201,GO:0010977,GO:0021510,GO:0021549,GO:0021766,GO:0021987,GO:0022038,GO:0030054,GO:0030285,GO:0030424,GO:0030517,GO:0032687,GO:0032688,GO:0034164,GO:0035335,GO:0035374,GO:0043204,GO:0043395,GO:0048671,GO:0048681,GO:0061000,GO:0070062,GO:0090557,GO:0099061	phosphoprotein phosphatase activity|protein tyrosine phosphatase activity|plasma membrane|integral component of plasma membrane|protein dephosphorylation|cell adhesion|heparin binding|negative regulation of neuron projection development|spinal cord development|cerebellum development|hippocampus development|cerebral cortex development|corpus callosum development|cell junction|integral component of…
hsa-miR-1180-3p	XM_017027067.1	157	-31.84	157	-31.84	102308	22	7209	2006	PTPRS	GeneID:5802,Genbank:XM_017027066.1,HGNC:HGNC:9681,MIM:601576	protein tyrosine phosphatase, receptor type S	GO:0004721,GO:0004725,GO:0005886,GO:0005887,GO:0006470,GO:0007155,GO:0008201,GO:0010977,GO:0021510,GO:0021549,GO:0021766,GO:0021987,GO:0022038,GO:0030054,GO:0030285,GO:0030424,GO:0030517,GO:0032687,GO:0032688,GO:0034164,GO:0035335,GO:0035374,GO:0043204,GO:0043395,GO:0048671,GO:0048681,GO:0061000,GO:0070062,GO:0090557,GO:0099061	phosphoprotein phosphatase activity|protein tyrosine phosphatase activity|plasma membrane|integral component of plasma membrane|protein dephosphorylation|cell adhesion|heparin binding|negative regulation of neuron projection development|spinal cord development|cerebellum development|hippocampus development|cerebral cortex development|corpus callosum development|cell junction|integral component of…
hsa-miR-1180-3p	XM_017027068.1	157	-31.84	157	-31.84	102309	22	7281	2090	PTPRS	GeneID:5802,Genbank:XM_017027066.1,HGNC:HGNC:9681,MIM:601576	protein tyrosine phosphatase, receptor type S	GO:0004721,GO:0004725,GO:0005886,GO:0005887,GO:0006470,GO:0007155,GO:0008201,GO:0010977,GO:0021510,GO:0021549,GO:0021766,GO:0021987,GO:0022038,GO:0030054,GO:0030285,GO:0030424,GO:0030517,GO:0032687,GO:0032688,GO:0034164,GO:0035335,GO:0035374,GO:0043204,GO:0043395,GO:0048671,GO:0048681,GO:0061000,GO:0070062,GO:0090557,GO:0099061	phosphoprotein phosphatase activity|protein tyrosine phosphatase activity|plasma membrane|integral component of plasma membrane|protein dephosphorylation|cell adhesion|heparin binding|negative regulation of neuron projection development|spinal cord development|cerebellum development|hippocampus development|cerebral cortex development|corpus callosum development|cell junction|integral component of…
hsa-miR-1180-3p	XM_017027069.1	157	-31.84	157	-31.84	102310	22	7266	2090	PTPRS	GeneID:5802,Genbank:XM_017027066.1,HGNC:HGNC:9681,MIM:601576	protein tyrosine phosphatase, receptor type S	GO:0004721,GO:0004725,GO:0005886,GO:0005887,GO:0006470,GO:0007155,GO:0008201,GO:0010977,GO:0021510,GO:0021549,GO:0021766,GO:0021987,GO:0022038,GO:0030054,GO:0030285,GO:0030424,GO:0030517,GO:0032687,GO:0032688,GO:0034164,GO:0035335,GO:0035374,GO:0043204,GO:0043395,GO:0048671,GO:0048681,GO:0061000,GO:0070062,GO:0090557,GO:0099061	phosphoprotein phosphatase activity|protein tyrosine phosphatase activity|plasma membrane|integral component of plasma membrane|protein dephosphorylation|cell adhesion|heparin binding|negative regulation of neuron projection development|spinal cord development|cerebellum development|hippocampus development|cerebral cortex development|corpus callosum development|cell junction|integral component of…
hsa-miR-1180-3p	XM_017027070.1	157	-31.84	157	-31.84	102311	22	7245	2090	PTPRS	GeneID:5802,Genbank:XM_017027066.1,HGNC:HGNC:9681,MIM:601576	protein tyrosine phosphatase, receptor type S	GO:0004721,GO:0004725,GO:0005886,GO:0005887,GO:0006470,GO:0007155,GO:0008201,GO:0010977,GO:0021510,GO:0021549,GO:0021766,GO:0021987,GO:0022038,GO:0030054,GO:0030285,GO:0030424,GO:0030517,GO:0032687,GO:0032688,GO:0034164,GO:0035335,GO:0035374,GO:0043204,GO:0043395,GO:0048671,GO:0048681,GO:0061000,GO:0070062,GO:0090557,GO:0099061	phosphoprotein phosphatase activity|protein tyrosine phosphatase activity|plasma membrane|integral component of plasma membrane|protein dephosphorylation|cell adhesion|heparin binding|negative regulation of neuron projection development|spinal cord development|cerebellum development|hippocampus development|cerebral cortex development|corpus callosum development|cell junction|integral component of…
hsa-miR-1180-3p	XM_017027071.1	157	-31.84	157	-31.84	102312	22	7233	2090	PTPRS	GeneID:5802,Genbank:XM_017027066.1,HGNC:HGNC:9681,MIM:601576	protein tyrosine phosphatase, receptor type S	GO:0004721,GO:0004725,GO:0005886,GO:0005887,GO:0006470,GO:0007155,GO:0008201,GO:0010977,GO:0021510,GO:0021549,GO:0021766,GO:0021987,GO:0022038,GO:0030054,GO:0030285,GO:0030424,GO:0030517,GO:0032687,GO:0032688,GO:0034164,GO:0035335,GO:0035374,GO:0043204,GO:0043395,GO:0048671,GO:0048681,GO:0061000,GO:0070062,GO:0090557,GO:0099061	phosphoprotein phosphatase activity|protein tyrosine phosphatase activity|plasma membrane|integral component of plasma membrane|protein dephosphorylation|cell adhesion|heparin binding|negative regulation of neuron projection development|spinal cord development|cerebellum development|hippocampus development|cerebral cortex development|corpus callosum development|cell junction|integral component of…
hsa-miR-1180-3p	XM_017027072.1	157	-31.84	157	-31.84	102313	22	7206	2090	PTPRS	GeneID:5802,Genbank:XM_017027066.1,HGNC:HGNC:9681,MIM:601576	protein tyrosine phosphatase, receptor type S	GO:0004721,GO:0004725,GO:0005886,GO:0005887,GO:0006470,GO:0007155,GO:0008201,GO:0010977,GO:0021510,GO:0021549,GO:0021766,GO:0021987,GO:0022038,GO:0030054,GO:0030285,GO:0030424,GO:0030517,GO:0032687,GO:0032688,GO:0034164,GO:0035335,GO:0035374,GO:0043204,GO:0043395,GO:0048671,GO:0048681,GO:0061000,GO:0070062,GO:0090557,GO:0099061	phosphoprotein phosphatase activity|protein tyrosine phosphatase activity|plasma membrane|integral component of plasma membrane|protein dephosphorylation|cell adhesion|heparin binding|negative regulation of neuron projection development|spinal cord development|cerebellum development|hippocampus development|cerebral cortex development|corpus callosum development|cell junction|integral component of…
hsa-miR-1180-3p	XM_017027073.1	157	-31.84	157	-31.84	102314	22	6496	1293	PTPRS	GeneID:5802,Genbank:XM_017027066.1,HGNC:HGNC:9681,MIM:601576	protein tyrosine phosphatase, receptor type S	GO:0004721,GO:0004725,GO:0005886,GO:0005887,GO:0006470,GO:0007155,GO:0008201,GO:0010977,GO:0021510,GO:0021549,GO:0021766,GO:0021987,GO:0022038,GO:0030054,GO:0030285,GO:0030424,GO:0030517,GO:0032687,GO:0032688,GO:0034164,GO:0035335,GO:0035374,GO:0043204,GO:0043395,GO:0048671,GO:0048681,GO:0061000,GO:0070062,GO:0090557,GO:0099061	phosphoprotein phosphatase activity|protein tyrosine phosphatase activity|plasma membrane|integral component of plasma membrane|protein dephosphorylation|cell adhesion|heparin binding|negative regulation of neuron projection development|spinal cord development|cerebellum development|hippocampus development|cerebral cortex development|corpus callosum development|cell junction|integral component of…
hsa-miR-1180-3p	XM_017027169.2	164	-30.41	164	-30.41	102397	22	2547	1467	ZSCAN18	GeneID:65982,Genbank:XM_006723335.2,HGNC:HGNC:21037	zinc finger and SCAN domain containing 18	GO:0000981,GO:0003677,GO:0005634,GO:0006351,GO:0046872	RNA polymerase II transcription factor activity, sequence-specific DNA binding|DNA binding|nucleus|transcription, DNA-templated|metal ion binding
hsa-miR-1180-3p	XM_017027170.2	164	-30.41	164	-30.41	102398	22	2621	1541	ZSCAN18	GeneID:65982,Genbank:XM_006723335.2,HGNC:HGNC:21037	zinc finger and SCAN domain containing 18	GO:0000981,GO:0003677,GO:0005634,GO:0006351,GO:0046872	RNA polymerase II transcription factor activity, sequence-specific DNA binding|DNA binding|nucleus|transcription, DNA-templated|metal ion binding
hsa-miR-1180-3p	XM_017027171.2	164	-30.41	164	-30.41	102399	22	2559	1479	ZSCAN18	GeneID:65982,Genbank:XM_006723335.2,HGNC:HGNC:21037	zinc finger and SCAN domain containing 18	GO:0000981,GO:0003677,GO:0005634,GO:0006351,GO:0046872	RNA polymerase II transcription factor activity, sequence-specific DNA binding|DNA binding|nucleus|transcription, DNA-templated|metal ion binding
hsa-miR-1180-3p	XM_017027200.2	157	-30.15	157	-30.15	102425	22	2262	451	VASP	GeneID:7408,Genbank:NM_003370.3,HGNC:HGNC:12652,MIM:601703	vasodilator stimulated phosphoprotein	GO:0001843,GO:0003779,GO:0005522,GO:0005829,GO:0005886,GO:0005923,GO:0005925,GO:0007411,GO:0008154,GO:0015629,GO:0017124,GO:0030838,GO:0031258,GO:0031527,GO:0034329,GO:0045296,GO:0051289,GO:0070062	neural tube closure|actin binding|profilin binding|cytosol|plasma membrane|bicellular tight junction|focal adhesion|axon guidance|actin polymerization or depolymerization|actin cytoskeleton|SH3 domain binding|positive regulation of actin filament polymerization|lamellipodium membrane|filopodium membrane|cell junction assembly|cadherin binding|protein homotetramerization|extracellular exosome	path:hsa04015,path:hsa04022,path:hsa04510,path:hsa04530,path:hsa04611,path:hsa04666,path:hsa04670	Rap1 signaling pathway|cGMP-PKG signaling pathway|Focal adhesion|Tight junction|Platelet activation|Fc gamma R-mediated phagocytosis|Leukocyte transendothelial migration
hsa-miR-1180-3p	XM_017027484.2	160	-33.93	160	-33.93	102674	22	2369	232	ARMC6	GeneID:93436,Genbank:NM_001199196.1,HGNC:HGNC:25049	armadillo repeat containing 6	GO:0002244,GO:0005829	hematopoietic progenitor cell differentiation|cytosol
hsa-miR-1180-3p	XM_017027485.2	160	-33.93	160	-33.93	102675	22	2606	228	ARMC6	GeneID:93436,Genbank:NM_001199196.1,HGNC:HGNC:25049	armadillo repeat containing 6	GO:0002244,GO:0005829	hematopoietic progenitor cell differentiation|cytosol
hsa-miR-1180-3p	XM_017027602.1	153	-30.6	153	-30.6	102771	22	2336	739	ADRM1	GeneID:11047,Genbank:XM_017027602.1,HGNC:HGNC:15759,MIM:610650	adhesion regulating molecule 1	GO:0000502,GO:0002020,GO:0005654,GO:0005829,GO:0005886,GO:0005887,GO:0006368,GO:0006511,GO:0008541,GO:0016020,GO:0016579,GO:0043130,GO:0043248,GO:0061133,GO:0070628	proteasome complex|protease binding|nucleoplasm|cytosol|plasma membrane|integral component of plasma membrane|transcription elongation from RNA polymerase II promoter|ubiquitin-dependent protein catabolic process|proteasome regulatory particle, lid subcomplex|membrane|protein deubiquitination|ubiquitin binding|proteasome assembly|endopeptidase activator activity|proteasome binding	path:hsa03050,path:hsa05169	Proteasome|Epstein-Barr virus infection
hsa-miR-1180-3p	XM_017027605.1	153	-30.6	153	-30.6	102772	22	2233	739	ADRM1	GeneID:11047,Genbank:XM_017027602.1,HGNC:HGNC:15759,MIM:610650	adhesion regulating molecule 1	GO:0000502,GO:0002020,GO:0005654,GO:0005829,GO:0005886,GO:0005887,GO:0006368,GO:0006511,GO:0008541,GO:0016020,GO:0016579,GO:0043130,GO:0043248,GO:0061133,GO:0070628	proteasome complex|protease binding|nucleoplasm|cytosol|plasma membrane|integral component of plasma membrane|transcription elongation from RNA polymerase II promoter|ubiquitin-dependent protein catabolic process|proteasome regulatory particle, lid subcomplex|membrane|protein deubiquitination|ubiquitin binding|proteasome assembly|endopeptidase activator activity|proteasome binding	path:hsa03050,path:hsa05169	Proteasome|Epstein-Barr virus infection
hsa-miR-1180-3p	XM_017027610.1	153	-30.6	153	-30.6	102773	22	1881	739	ADRM1	GeneID:11047,Genbank:XM_017027602.1,HGNC:HGNC:15759,MIM:610650	adhesion regulating molecule 1	GO:0000502,GO:0002020,GO:0005654,GO:0005829,GO:0005886,GO:0005887,GO:0006368,GO:0006511,GO:0008541,GO:0016020,GO:0016579,GO:0043130,GO:0043248,GO:0061133,GO:0070628	proteasome complex|protease binding|nucleoplasm|cytosol|plasma membrane|integral component of plasma membrane|transcription elongation from RNA polymerase II promoter|ubiquitin-dependent protein catabolic process|proteasome regulatory particle, lid subcomplex|membrane|protein deubiquitination|ubiquitin binding|proteasome assembly|endopeptidase activator activity|proteasome binding	path:hsa03050,path:hsa05169	Proteasome|Epstein-Barr virus infection
hsa-miR-1180-3p	XM_017028127.2	165	-31.22	165	-31.22	103207	22	2561	607	MGME1	GeneID:92667,Genbank:XM_017028128.1,HGNC:HGNC:16205,MIM:615076	mitochondrial genome maintenance exonuclease 1	GO:0000002,GO:0003677,GO:0005739,GO:0006264,GO:0008297,GO:0043504	mitochondrial genome maintenance|DNA binding|mitochondrion|mitochondrial DNA replication|single-stranded DNA exodeoxyribonuclease activity|mitochondrial DNA repair
hsa-miR-1180-3p	XM_017028128.1	165	-31.22	165	-31.22	103208	22	2454	500	MGME1	GeneID:92667,Genbank:XM_017028128.1,HGNC:HGNC:16205,MIM:615076	mitochondrial genome maintenance exonuclease 1	GO:0000002,GO:0003677,GO:0005739,GO:0006264,GO:0008297,GO:0043504	mitochondrial genome maintenance|DNA binding|mitochondrion|mitochondrial DNA replication|single-stranded DNA exodeoxyribonuclease activity|mitochondrial DNA repair
hsa-miR-1180-3p	XM_017028386.1	162	-30.04	162	-30.04	103402	22	1938	179	RBM11	GeneID:54033,Genbank:XM_005260997.5,HGNC:HGNC:9897	RNA binding motif protein 11	GO:0000381,GO:0005634,GO:0005654,GO:0006397,GO:0007275,GO:0008266,GO:0008380,GO:0016607,GO:0030154,GO:0034599,GO:0042803	regulation of alternative mRNA splicing, via spliceosome|nucleus|nucleoplasm|mRNA processing|multicellular organism development|poly(U) RNA binding|RNA splicing|nuclear speck|cell differentiation|cellular response to oxidative stress|protein homodimerization activity
hsa-miR-1180-3p	XM_017028387.1	162	-30.04	162	-30.04	103403	22	1945	196	RBM11	GeneID:54033,Genbank:XM_005260997.5,HGNC:HGNC:9897	RNA binding motif protein 11	GO:0000381,GO:0005634,GO:0005654,GO:0006397,GO:0007275,GO:0008266,GO:0008380,GO:0016607,GO:0030154,GO:0034599,GO:0042803	regulation of alternative mRNA splicing, via spliceosome|nucleus|nucleoplasm|mRNA processing|multicellular organism development|poly(U) RNA binding|RNA splicing|nuclear speck|cell differentiation|cellular response to oxidative stress|protein homodimerization activity
hsa-miR-1180-3p	XM_017028405.2	176	-35.92	176	-35.92	103416	22	1270	5	SETD4	GeneID:54093,Genbank:XM_011529642.2,HGNC:HGNC:1258	SET domain containing 4	GO:0005730,GO:0016279,GO:0018023,GO:0018026,GO:0042254	nucleolus|protein-lysine N-methyltransferase activity|peptidyl-lysine trimethylation|peptidyl-lysine monomethylation|ribosome biogenesis
hsa-miR-1180-3p	XM_024446029.1	170	-31.37	170	-31.37	104875	22	2150	717	RELL2	GeneID:285613,Genbank:NM_173828.4,HGNC:HGNC:26902,MIM:611213	RELT like 2	GO:0005518,GO:0005604,GO:0005886,GO:0010811,GO:0016021	collagen binding|basement membrane|plasma membrane|positive regulation of cell-substrate adhesion|integral component of membrane
hsa-miR-1180-3p	XM_024446240.1	161	-32.52	161	-32.52	105086	22	1707	23	PHYKPL	GeneID:85007,Genbank:NM_153373.3,HGNC:HGNC:28249,MIM:614683	5-phosphohydroxy-L-lysine phospho-lyase	GO:0005739,GO:0005759,GO:0006554,GO:0008453,GO:0016829,GO:0030170,GO:0030574,GO:0042802	mitochondrion|mitochondrial matrix|lysine catabolic process|alanine-glyoxylate transaminase activity|lyase activity|pyridoxal phosphate binding|collagen catabolic process|identical protein binding	path:hsa00310	Lysine degradation
hsa-miR-1180-3p	XM_024446241.1	161	-32.52	161	-32.52	105087	22	1355	23	PHYKPL	GeneID:85007,Genbank:NM_153373.3,HGNC:HGNC:28249,MIM:614683	5-phosphohydroxy-L-lysine phospho-lyase	GO:0005739,GO:0005759,GO:0006554,GO:0008453,GO:0016829,GO:0030170,GO:0030574,GO:0042802	mitochondrion|mitochondrial matrix|lysine catabolic process|alanine-glyoxylate transaminase activity|lyase activity|pyridoxal phosphate binding|collagen catabolic process|identical protein binding	path:hsa00310	Lysine degradation
hsa-miR-1180-3p	XM_024446244.1	161	-32.52	161	-32.52	105090	22	1530	23	PHYKPL	GeneID:85007,Genbank:NM_153373.3,HGNC:HGNC:28249,MIM:614683	5-phosphohydroxy-L-lysine phospho-lyase	GO:0005739,GO:0005759,GO:0006554,GO:0008453,GO:0016829,GO:0030170,GO:0030574,GO:0042802	mitochondrion|mitochondrial matrix|lysine catabolic process|alanine-glyoxylate transaminase activity|lyase activity|pyridoxal phosphate binding|collagen catabolic process|identical protein binding	path:hsa00310	Lysine degradation
hsa-miR-1180-3p	XM_024446245.1	161	-32.52	161	-32.52	105091	22	1889	23	PHYKPL	GeneID:85007,Genbank:NM_153373.3,HGNC:HGNC:28249,MIM:614683	5-phosphohydroxy-L-lysine phospho-lyase	GO:0005739,GO:0005759,GO:0006554,GO:0008453,GO:0016829,GO:0030170,GO:0030574,GO:0042802	mitochondrion|mitochondrial matrix|lysine catabolic process|alanine-glyoxylate transaminase activity|lyase activity|pyridoxal phosphate binding|collagen catabolic process|identical protein binding	path:hsa00310	Lysine degradation
hsa-miR-1180-3p	XM_024446249.1	161	-32.52	161	-32.52	105095	22	1859	23	PHYKPL	GeneID:85007,Genbank:NM_153373.3,HGNC:HGNC:28249,MIM:614683	5-phosphohydroxy-L-lysine phospho-lyase	GO:0005739,GO:0005759,GO:0006554,GO:0008453,GO:0016829,GO:0030170,GO:0030574,GO:0042802	mitochondrion|mitochondrial matrix|lysine catabolic process|alanine-glyoxylate transaminase activity|lyase activity|pyridoxal phosphate binding|collagen catabolic process|identical protein binding	path:hsa00310	Lysine degradation
hsa-miR-1180-3p	XM_024446251.1	161	-32.52	161	-32.52	105097	22	1410	23	PHYKPL	GeneID:85007,Genbank:NM_153373.3,HGNC:HGNC:28249,MIM:614683	5-phosphohydroxy-L-lysine phospho-lyase	GO:0005739,GO:0005759,GO:0006554,GO:0008453,GO:0016829,GO:0030170,GO:0030574,GO:0042802	mitochondrion|mitochondrial matrix|lysine catabolic process|alanine-glyoxylate transaminase activity|lyase activity|pyridoxal phosphate binding|collagen catabolic process|identical protein binding	path:hsa00310	Lysine degradation
hsa-miR-1180-3p	XM_024446252.1	161	-32.52	161	-32.52	105098	22	1025	23	PHYKPL	GeneID:85007,Genbank:NM_153373.3,HGNC:HGNC:28249,MIM:614683	5-phosphohydroxy-L-lysine phospho-lyase	GO:0005739,GO:0005759,GO:0006554,GO:0008453,GO:0016829,GO:0030170,GO:0030574,GO:0042802	mitochondrion|mitochondrial matrix|lysine catabolic process|alanine-glyoxylate transaminase activity|lyase activity|pyridoxal phosphate binding|collagen catabolic process|identical protein binding	path:hsa00310	Lysine degradation
hsa-miR-1180-3p	XM_024446805.1	159	-30.44	159	-30.44	105651	22	5840	12	RNF216	GeneID:54476,Genbank:NM_207116.2,HGNC:HGNC:21698,MIM:609948	ring finger protein 216	GO:0005634,GO:0005654,GO:0005829,GO:0006915,GO:0016032,GO:0032480,GO:0032648,GO:0043161,GO:0046872,GO:0050691,GO:0061630,GO:0070936	nucleus|nucleoplasm|cytosol|apoptotic process|viral process|negative regulation of type I interferon production|regulation of interferon-beta production|proteasome-mediated ubiquitin-dependent protein catabolic process|metal ion binding|regulation of defense response to virus by host|ubiquitin protein ligase activity|protein K48-linked ubiquitination
hsa-miR-1180-3p	XM_024446807.1	159	-30.44	159	-30.44	105653	22	5902	17	RNF216	GeneID:54476,Genbank:NM_207116.2,HGNC:HGNC:21698,MIM:609948	ring finger protein 216	GO:0005634,GO:0005654,GO:0005829,GO:0006915,GO:0016032,GO:0032480,GO:0032648,GO:0043161,GO:0046872,GO:0050691,GO:0061630,GO:0070936	nucleus|nucleoplasm|cytosol|apoptotic process|viral process|negative regulation of type I interferon production|regulation of interferon-beta production|proteasome-mediated ubiquitin-dependent protein catabolic process|metal ion binding|regulation of defense response to virus by host|ubiquitin protein ligase activity|protein K48-linked ubiquitination
hsa-miR-1180-3p	XM_024447128.1	161	-34.22	161	-34.22	105974	22	8321	1782	ANK1	GeneID:286,Genbank:NM_001142446.1,HGNC:HGNC:492,MIM:612641	ankyrin 1			path:hsa05205	Proteoglycans in cancer
hsa-miR-1180-3p	XM_024447245.1	155	-30.89	155	-30.89	106091	22	1652	36	MUTYH	GeneID:4595,Genbank:NM_001350651.1,HGNC:HGNC:7527,MIM:604933	mutY DNA glycosylase			path:hsa03410	Base excision repair
hsa-miR-1180-3p	XM_024448041.1	170	-30.36	170	-30.36	106887	22	4337	534	PANK1	GeneID:53354,Genbank:NM_148977.2,HGNC:HGNC:8598,MIM:606160	pantothenate kinase 1	GO:0004594,GO:0005524,GO:0005634,GO:0005829,GO:0009108,GO:0015937,GO:0030118,GO:0055037,GO:0071944	pantothenate kinase activity|ATP binding|nucleus|cytosol|coenzyme biosynthetic process|coenzyme A biosynthetic process|clathrin coat|recycling endosome|cell periphery	path:hsa00770	Pantothenate and CoA biosynthesis
hsa-miR-1180-3p	XM_024448585.1	171	-30.42	171	-30.42	107431	22	1937	596	WDR74	GeneID:54663,Genbank:XM_024448586.1,HGNC:HGNC:25529	WD repeat domain 74	GO:0005634,GO:0005730,GO:0030687,GO:0042273	nucleus|nucleolus|preribosome, large subunit precursor|ribosomal large subunit biogenesis
hsa-miR-1180-3p	XM_024448673.1	163	-32.04	163	-32.04	107519	22	5489	1727	ADGRB2	GeneID:576,Genbank:XM_011541849.2,HGNC:HGNC:944,MIM:602683	adhesion G protein-coupled receptor B2	GO:0004930,GO:0005813,GO:0005886,GO:0007166,GO:0007186,GO:0007422,GO:0016021,GO:0016525,GO:0033173,GO:0051965	G-protein coupled receptor activity|centrosome|plasma membrane|cell surface receptor signaling pathway|G-protein coupled receptor signaling pathway|peripheral nervous system development|integral component of membrane|negative regulation of angiogenesis|calcineurin-NFAT signaling cascade|positive regulation of synapse assembly
hsa-miR-1180-3p	XM_024448765.1	165	-30.99	165	-30.99	107611	22	4168	3003	PCSK7	GeneID:9159,Genbank:XM_024448764.1,HGNC:HGNC:8748,MIM:604872	proprotein convertase subtilisin/kexin type 7	GO:0004252,GO:0008233,GO:0016485,GO:0016486,GO:0030173	serine-type endopeptidase activity|peptidase activity|protein processing|peptide hormone processing|integral component of Golgi membrane
hsa-miR-1180-3p	XM_024448874.1	163	-33.52	163	-33.52	107720	22	3550	987	ZNF384	GeneID:171017,Genbank:NM_001039920.2,HGNC:HGNC:11955,MIM:609951	zinc finger protein 384
hsa-miR-1180-3p	XM_024449284.1	161	-30.1	161	-30.1	108130	22	4226	1659	SART3	GeneID:9733,Genbank:NM_014706.3,HGNC:HGNC:16860,MIM:611684	squamous cell carcinoma antigen recognized by T cells 3	GO:0000244,GO:0000387,GO:0000398,GO:0000902,GO:0003723,GO:0005634,GO:0005654,GO:0005737,GO:0006334,GO:0010468,GO:0015030,GO:0016607,GO:0017070,GO:0030621,GO:0030624,GO:0042393,GO:0048872,GO:0071425,GO:1903586,GO:1990381	spliceosomal tri-snRNP complex assembly|spliceosomal snRNP assembly|mRNA splicing, via spliceosome|cell morphogenesis|RNA binding|nucleus|nucleoplasm|cytoplasm|nucleosome assembly|regulation of gene expression|Cajal body|nuclear speck|U6 snRNA binding|U4 snRNA binding|U6atac snRNA binding|histone binding|homeostasis of number of cells|hematopoietic stem cell proliferation|positive regulation of h…
hsa-miR-1180-3p	XM_024449837.1	162	-31.07	162	-31.07	108683	22	1172	1	HIGD2B	GeneID:123346,Genbank:NM_001350932.1,HGNC:HGNC:26984	HIG1 hypoxia inducible domain family member 2B	GO:0016021	integral component of membrane
hsa-miR-1180-3p	XM_024449838.1	162	-31.07	162	-31.07	108684	22	1272	1	HIGD2B	GeneID:123346,Genbank:NM_001350932.1,HGNC:HGNC:26984	HIG1 hypoxia inducible domain family member 2B	GO:0016021	integral component of membrane
hsa-miR-1180-3p	XM_024449839.1	162	-31.07	162	-31.07	108685	22	1230	1	HIGD2B	GeneID:123346,Genbank:NM_001350932.1,HGNC:HGNC:26984	HIG1 hypoxia inducible domain family member 2B	GO:0016021	integral component of membrane
hsa-miR-1180-3p	XM_024449840.1	162	-31.07	162	-31.07	108686	22	1079	1	HIGD2B	GeneID:123346,Genbank:NM_001350932.1,HGNC:HGNC:26984	HIG1 hypoxia inducible domain family member 2B	GO:0016021	integral component of membrane
hsa-miR-1180-3p	XM_024449841.1	162	-31.07	162	-31.07	108687	22	927	1	HIGD2B	GeneID:123346,Genbank:NM_001350932.1,HGNC:HGNC:26984	HIG1 hypoxia inducible domain family member 2B	GO:0016021	integral component of membrane
hsa-miR-1180-3p	XM_024449842.1	162	-31.07	162	-31.07	108688	22	827	1	HIGD2B	GeneID:123346,Genbank:NM_001350932.1,HGNC:HGNC:26984	HIG1 hypoxia inducible domain family member 2B	GO:0016021	integral component of membrane
hsa-miR-1180-3p	XM_024449962.1	162	-32.93	162	-32.93	108808	22	1752	1	ZFAND6	GeneID:54469,Genbank:NM_001242912.1,HGNC:HGNC:30164,MIM:610183	zinc finger AN1-type containing 6	GO:0003677,GO:0005737,GO:0006625,GO:0006915,GO:0008270,GO:0031593,GO:0043066,GO:0043122,GO:0071356	DNA binding|cytoplasm|protein targeting to peroxisome|apoptotic process|zinc ion binding|polyubiquitin modification-dependent protein binding|negative regulation of apoptotic process|regulation of I-kappaB kinase/NF-kappaB signaling|cellular response to tumor necrosis factor
hsa-miR-1180-3p	XM_024451008.1	162	-33.52	162	-33.52	109854	22	2963	612	FAM104A	GeneID:84923,Genbank:NM_001289410.1,HGNC:HGNC:25918	family with sequence similarity 104 member A
hsa-miR-1180-3p	XM_024451296.1	162	-30.37	162	-30.37	110142	22	2170	1179	LOC100286986	GeneID:100286986,Genbank:XM_024451296.1	atrophin-domain containing
hsa-miR-1180-3p	XM_024451624.1	172	-33.83	172	-33.83	110470	22	4027	397	USP29	GeneID:57663,Genbank:XM_024451624.1,HGNC:HGNC:18563,MIM:609546	ubiquitin specific peptidase 29	GO:0006511,GO:0016579,GO:0036459	ubiquitin-dependent protein catabolic process|protein deubiquitination|thiol-dependent ubiquitinyl hydrolase activity
hsa-miR-1180-3p	XM_024451721.1	162	-34.16	162	-34.16	110567	22	6845	3401	MYH14	GeneID:79784,Genbank:XM_011527320.2,HGNC:HGNC:23212,MIM:608568	myosin heavy chain 14	GO:0000146,GO:0001725,GO:0003009,GO:0005516,GO:0005524,GO:0005829,GO:0005903,GO:0007519,GO:0007605,GO:0008360,GO:0016020,GO:0016460,GO:0016887,GO:0019228,GO:0030048,GO:0030424,GO:0030426,GO:0030898,GO:0031032,GO:0042641,GO:0043209,GO:0051015,GO:0070062,GO:0070584,GO:0071625,GO:0097513	microfilament motor activity|stress fiber|skeletal muscle contraction|calmodulin binding|ATP binding|cytosol|brush border|skeletal muscle tissue development|sensory perception of sound|regulation of cell shape|membrane|myosin II complex|ATPase activity|neuronal action potential|actin filament-based movement|axon|growth cone|actin-dependent ATPase activity|actomyosin structure organization|actomyo…	path:hsa04530,path:hsa04810,path:hsa05132	Tight junction|Regulation of actin cytoskeleton|Salmonella infection
hsa-miR-1180-3p	XM_024451736.1	161	-30.46	161	-30.46	110582	22	4644	220	C19orf12	GeneID:83636,Genbank:NM_001256047.1,HGNC:HGNC:25443,MIM:614297	chromosome 19 open reading frame 12	GO:0005739,GO:0005783,GO:0005829,GO:0006914,GO:0006915,GO:0006979,GO:0016021,GO:0031966,GO:0051560	mitochondrion|endoplasmic reticulum|cytosol|autophagy|apoptotic process|response to oxidative stress|integral component of membrane|mitochondrial membrane|mitochondrial calcium ion homeostasis
hsa-miR-1180-3p	XM_024451814.1	153	-30.6	153	-30.6	110660	22	2504	739	ADRM1	GeneID:11047,Genbank:XM_017027602.1,HGNC:HGNC:15759,MIM:610650	adhesion regulating molecule 1	GO:0000502,GO:0002020,GO:0005654,GO:0005829,GO:0005886,GO:0005887,GO:0006368,GO:0006511,GO:0008541,GO:0016020,GO:0016579,GO:0043130,GO:0043248,GO:0061133,GO:0070628	proteasome complex|protease binding|nucleoplasm|cytosol|plasma membrane|integral component of plasma membrane|transcription elongation from RNA polymerase II promoter|ubiquitin-dependent protein catabolic process|proteasome regulatory particle, lid subcomplex|membrane|protein deubiquitination|ubiquitin binding|proteasome assembly|endopeptidase activator activity|proteasome binding	path:hsa03050,path:hsa05169	Proteasome|Epstein-Barr virus infection
hsa-miR-1180-3p	XM_024451815.1	153	-30.6	153	-30.6	110661	22	2500	739	ADRM1	GeneID:11047,Genbank:XM_017027602.1,HGNC:HGNC:15759,MIM:610650	adhesion regulating molecule 1	GO:0000502,GO:0002020,GO:0005654,GO:0005829,GO:0005886,GO:0005887,GO:0006368,GO:0006511,GO:0008541,GO:0016020,GO:0016579,GO:0043130,GO:0043248,GO:0061133,GO:0070628	proteasome complex|protease binding|nucleoplasm|cytosol|plasma membrane|integral component of plasma membrane|transcription elongation from RNA polymerase II promoter|ubiquitin-dependent protein catabolic process|proteasome regulatory particle, lid subcomplex|membrane|protein deubiquitination|ubiquitin binding|proteasome assembly|endopeptidase activator activity|proteasome binding	path:hsa03050,path:hsa05169	Proteasome|Epstein-Barr virus infection
hsa-miR-1180-3p	XM_024451816.1	153	-30.6	153	-30.6	110662	22	2387	739	ADRM1	GeneID:11047,Genbank:XM_017027602.1,HGNC:HGNC:15759,MIM:610650	adhesion regulating molecule 1	GO:0000502,GO:0002020,GO:0005654,GO:0005829,GO:0005886,GO:0005887,GO:0006368,GO:0006511,GO:0008541,GO:0016020,GO:0016579,GO:0043130,GO:0043248,GO:0061133,GO:0070628	proteasome complex|protease binding|nucleoplasm|cytosol|plasma membrane|integral component of plasma membrane|transcription elongation from RNA polymerase II promoter|ubiquitin-dependent protein catabolic process|proteasome regulatory particle, lid subcomplex|membrane|protein deubiquitination|ubiquitin binding|proteasome assembly|endopeptidase activator activity|proteasome binding	path:hsa03050,path:hsa05169	Proteasome|Epstein-Barr virus infection
hsa-miR-1180-3p	XM_024451817.1	153	-30.6	153	-30.6	110663	22	2383	739	ADRM1	GeneID:11047,Genbank:XM_017027602.1,HGNC:HGNC:15759,MIM:610650	adhesion regulating molecule 1	GO:0000502,GO:0002020,GO:0005654,GO:0005829,GO:0005886,GO:0005887,GO:0006368,GO:0006511,GO:0008541,GO:0016020,GO:0016579,GO:0043130,GO:0043248,GO:0061133,GO:0070628	proteasome complex|protease binding|nucleoplasm|cytosol|plasma membrane|integral component of plasma membrane|transcription elongation from RNA polymerase II promoter|ubiquitin-dependent protein catabolic process|proteasome regulatory particle, lid subcomplex|membrane|protein deubiquitination|ubiquitin binding|proteasome assembly|endopeptidase activator activity|proteasome binding	path:hsa03050,path:hsa05169	Proteasome|Epstein-Barr virus infection
hsa-miR-1180-3p	XM_024451819.1	153	-30.6	153	-30.6	110665	22	2173	739	ADRM1	GeneID:11047,Genbank:XM_017027602.1,HGNC:HGNC:15759,MIM:610650	adhesion regulating molecule 1	GO:0000502,GO:0002020,GO:0005654,GO:0005829,GO:0005886,GO:0005887,GO:0006368,GO:0006511,GO:0008541,GO:0016020,GO:0016579,GO:0043130,GO:0043248,GO:0061133,GO:0070628	proteasome complex|protease binding|nucleoplasm|cytosol|plasma membrane|integral component of plasma membrane|transcription elongation from RNA polymerase II promoter|ubiquitin-dependent protein catabolic process|proteasome regulatory particle, lid subcomplex|membrane|protein deubiquitination|ubiquitin binding|proteasome assembly|endopeptidase activator activity|proteasome binding	path:hsa03050,path:hsa05169	Proteasome|Epstein-Barr virus infection
hsa-miR-1180-3p	XM_024452017.1	165	-31.22	165	-31.22	110863	22	1972	371	MGME1	GeneID:92667,Genbank:XM_017028128.1,HGNC:HGNC:16205,MIM:615076	mitochondrial genome maintenance exonuclease 1	GO:0000002,GO:0003677,GO:0005739,GO:0006264,GO:0008297,GO:0043504	mitochondrial genome maintenance|DNA binding|mitochondrion|mitochondrial DNA replication|single-stranded DNA exodeoxyribonuclease activity|mitochondrial DNA repair
hsa-miR-1180-3p	XM_024452122.1	176	-35.92	176	-35.92	110968	22	1418	5	SETD4	GeneID:54093,Genbank:XM_011529642.2,HGNC:HGNC:1258	SET domain containing 4	GO:0005730,GO:0016279,GO:0018023,GO:0018026,GO:0042254	nucleolus|protein-lysine N-methyltransferase activity|peptidyl-lysine trimethylation|peptidyl-lysine monomethylation|ribosome biogenesis
hsa-miR-1180-3p	XM_024452575.1	162	-30.46	162	-30.46	111365	22	2424	22	RABL2A	GeneID:11159,Genbank:XM_017003211.1,HGNC:HGNC:9799,MIM:605412	RAB, member of RAS oncogene family like 2A	GO:0003924,GO:0005525	GTPase activity|GTP binding
hsa-miR-1180-3p	XM_024452576.1	162	-30.46	162	-30.46	111366	22	2115	9	RABL2A	GeneID:11159,Genbank:XM_017003211.1,HGNC:HGNC:9799,MIM:605412	RAB, member of RAS oncogene family like 2A	GO:0003924,GO:0005525	GTPase activity|GTP binding
hsa-miR-1180-3p	XM_024453863.1	175	-32.22	175	-32.22	112558	22	4197	819	LOC107986163	GeneID:107986163,Genbank:XM_024453863.1	uncharacterized LOC107986163	GO:0003677,GO:0005634	DNA binding|nucleus
hsa-miR-1285-3p	NM_000112.3	192	-39.96	192	-39.96	113192	22	8082	4443	SLC26A2	GeneID:1836,Genbank:NM_000112.3,HGNC:HGNC:10994,MIM:606718	solute carrier family 26 member 2	GO:0001503,GO:0005254,GO:0005886,GO:0005887,GO:0006811,GO:0008271,GO:0015106,GO:0015116,GO:0015301,GO:0015701,GO:0016020,GO:0016324,GO:0019531,GO:0031528,GO:0042391,GO:0050428,GO:0051453,GO:0070062,GO:1902358,GO:1902476	ossification|chloride channel activity|plasma membrane|integral component of plasma membrane|ion transport|secondary active sulfate transmembrane transporter activity|bicarbonate transmembrane transporter activity|sulfate transmembrane transporter activity|anion:anion antiporter activity|bicarbonate transport|membrane|apical plasma membrane|oxalate transmembrane transporter activity|microvillus m…
hsa-miR-1285-3p	NM_000144.4	180	-34.83	180	-34.83	113223	22	7168	3986	FXN	GeneID:2395,Genbank:NM_181425.2,HGNC:HGNC:3951,MIM:606829	frataxin	GO:0004322,GO:0005739,GO:0005759,GO:0005829,GO:0006119,GO:0006783,GO:0006811,GO:0006879,GO:0007005,GO:0007628,GO:0008198,GO:0008199,GO:0008284,GO:0009060,GO:0009792,GO:0010039,GO:0010722,GO:0016540,GO:0018283,GO:0019230,GO:0030307,GO:0034986,GO:0040015,GO:0043066,GO:0043085,GO:0044281,GO:0046621,GO:0051349,GO:0051536,GO:0051537,GO:0070301,GO:0090201,GO:1904231,GO:1904234	ferroxidase activity|mitochondrion|mitochondrial matrix|cytosol|oxidative phosphorylation|heme biosynthetic process|ion transport|cellular iron ion homeostasis|mitochondrion organization|adult walking behavior|ferrous iron binding|ferric iron binding|positive regulation of cell proliferation|aerobic respiration|embryo development ending in birth or egg hatching|response to iron ion|regulation of …	path:hsa00860	Porphyrin and chlorophyll metabolism
hsa-miR-1285-3p	NM_000148.3	188	-39.49	188	-39.49	113227	22	4246	2650	FUT1	GeneID:2523,Genbank:NM_000148.3,HGNC:HGNC:4012,MIM:211100	fucosyltransferase 1 (H blood group)			path:hsa00601,path:hsa00603	Glycosphingolipid biosynthesis - lacto and neolacto series|Glycosphingolipid biosynthesis - globo and isoglobo series
hsa-miR-1285-3p	NM_000151.3	376	-75.54	192	-39.96	113230	22	4169	2388 3853	G6PC	GeneID:2538,Genbank:NM_000151.3,HGNC:HGNC:4056,MIM:613742	glucose-6-phosphatase catalytic subunit	GO:0004346,GO:0005789,GO:0005977,GO:0005980,GO:0006094,GO:0006641,GO:0008202,GO:0010468,GO:0015760,GO:0016021,GO:0016773,GO:0030176,GO:0032094,GO:0035264,GO:0042301,GO:0042593,GO:0042632,GO:0046415,GO:0046838,GO:0051156	glucose-6-phosphatase activity|endoplasmic reticulum membrane|glycogen metabolic process|glycogen catabolic process|gluconeogenesis|triglyceride metabolic process|steroid metabolic process|regulation of gene expression|glucose-6-phosphate transport|integral component of membrane|phosphotransferase activity, alcohol group as acceptor|integral component of endoplasmic reticulum membrane|response to…	path:hsa00010,path:hsa00052,path:hsa00500,path:hsa04068,path:hsa04151,path:hsa04152,path:hsa04910,path:hsa04920,path:hsa04922,path:hsa04931,path:hsa04973	Glycolysis / Gluconeogenesis|Galactose metabolism|Starch and sucrose metabolism|FoxO signaling pathway|PI3K-Akt signaling pathway|AMPK signaling pathway|Insulin signaling pathway|Adipocytokine signaling pathway|Glucagon signaling pathway|Insulin resistance|Carbohydrate digestion and absorption
hsa-miR-1285-3p	NM_000175.4	192	-34.32	192	-34.32	113254	22	4219	3622	GPI	GeneID:2821,Genbank:XM_011526754.3,HGNC:HGNC:4458,MIM:172400	glucose-6-phosphate isomerase			path:hsa00010,path:hsa00030,path:hsa00500,path:hsa00520	Glycolysis / Gluconeogenesis|Pentose phosphate pathway|Starch and sucrose metabolism|Amino sugar and nucleotide sugar metabolism
hsa-miR-1285-3p	NM_000201.2	164	-31.52	164	-31.52	113280	22	3249	3187	ICAM1	GeneID:3383,Genbank:NM_000201.2,HGNC:HGNC:5344,MIM:147840	intercellular adhesion molecule 1			path:hsa04064,path:hsa04514,path:hsa04650,path:hsa04668,path:hsa04670,path:hsa04933,path:hsa05143,path:hsa05144,path:hsa05150,path:hsa05164,path:hsa05166,path:hsa05167,path:hsa05169,path:hsa05323,path:hsa05416,path:hsa05418	NF-kappa B signaling pathway|Cell adhesion molecules (CAMs)|Natural killer cell mediated cytotoxicity|TNF signaling pathway|Leukocyte transendothelial migration|AGE-RAGE signaling pathway in diabetic complications|African trypanosomiasis|Malaria|Staphylococcus aureus infection|Influenza A|Human T-cell leukemia virus 1 infection|Kaposi sarcoma-associated herpesvirus infection|Epstein-Barr virus in…
hsa-miR-1285-3p	NM_000246.3	177	-32.39	177	-32.39	113322	22	4654	3931	CIITA	GeneID:4261,Genbank:XM_011522486.2,HGNC:HGNC:7067,MIM:600005	class II major histocompatibility complex transactivator			path:hsa04612,path:hsa05145,path:hsa05152,path:hsa05164,path:hsa05340	Antigen processing and presentation|Toxoplasmosis|Tuberculosis|Influenza A|Primary immunodeficiency
hsa-miR-1285-3p	NM_000284.3	172	-32.15	172	-32.15	113358	22	3390	2042	PDHA1	GeneID:5160,Genbank:NM_001173454.1,HGNC:HGNC:8806,MIM:300502	pyruvate dehydrogenase E1 alpha 1 subunit	GO:0004738,GO:0004739,GO:0005634,GO:0005730,GO:0005739,GO:0005759,GO:0006006,GO:0006086,GO:0006090,GO:0006099,GO:0010510,GO:0034604,GO:0034641,GO:0043209,GO:0045254,GO:0061732	pyruvate dehydrogenase activity|pyruvate dehydrogenase (acetyl-transferring) activity|nucleus|nucleolus|mitochondrion|mitochondrial matrix|glucose metabolic process|acetyl-CoA biosynthetic process from pyruvate|pyruvate metabolic process|tricarboxylic acid cycle|regulation of acetyl-CoA biosynthetic process from pyruvate|pyruvate dehydrogenase (NAD+) activity|cellular nitrogen compound metabolic …	path:hsa00010,path:hsa00020,path:hsa00620,path:hsa04066,path:hsa04922,path:hsa05230	Glycolysis / Gluconeogenesis|Citrate cycle (TCA cycle)|Pyruvate metabolism|HIF-1 signaling pathway|Glucagon signaling pathway|Central carbon metabolism in cancer
hsa-miR-1285-3p	NM_000294.2	364	-67.4	184	-36.8	113368	22	5503	2907 3072	PHKG2	GeneID:5261,Genbank:NM_000294.2,HGNC:HGNC:8931,MIM:172471	phosphorylase kinase catalytic subunit gamma 2	GO:0004674,GO:0004689,GO:0005516,GO:0005524,GO:0005829,GO:0005964,GO:0005977,GO:0005978,GO:0005980,GO:0006091,GO:0006468,GO:0018105,GO:0018107,GO:0019899,GO:0035556,GO:0045819,GO:0050321	protein serine/threonine kinase activity|phosphorylase kinase activity|calmodulin binding|ATP binding|cytosol|phosphorylase kinase complex|glycogen metabolic process|glycogen biosynthetic process|glycogen catabolic process|generation of precursor metabolites and energy|protein phosphorylation|peptidyl-serine phosphorylation|peptidyl-threonine phosphorylation|enzyme binding|intracellular signal tr…	path:hsa04020,path:hsa04910,path:hsa04922	Calcium signaling pathway|Insulin signaling pathway|Glucagon signaling pathway
hsa-miR-1285-3p	NM_000318.2	200	-44.27	200	-44.27	113392	22	4392	3339	PEX2	GeneID:5828,Genbank:NM_001172087.1,HGNC:HGNC:9717,MIM:170993	peroxisomal biogenesis factor 2	GO:0000038,GO:0000122,GO:0005778,GO:0005779,GO:0006635,GO:0007031,GO:0016020,GO:0016558,GO:0016567,GO:0016593,GO:0031648,GO:0046872,GO:0048147,GO:0050680,GO:0061630	very long-chain fatty acid metabolic process|negative regulation of transcription from RNA polymerase II promoter|peroxisomal membrane|integral component of peroxisomal membrane|fatty acid beta-oxidation|peroxisome organization|membrane|protein import into peroxisome matrix|protein ubiquitination|Cdc73/Paf1 complex|protein destabilization|metal ion binding|negative regulation of fibroblast prolif…	path:hsa04146	Peroxisome
hsa-miR-1285-3p	NM_000373.3	370	-71.09	187	-36.25	113444	22	6738	1904 4496	UMPS	GeneID:7372,Genbank:NM_000373.3,HGNC:HGNC:12563,MIM:613891	uridine monophosphate synthetase			path:hsa00240,path:hsa00983	Pyrimidine metabolism|Drug metabolism - other enzymes
hsa-miR-1285-3p	NM_000440.2	358	-70.28	188	-37.74	113510	22	5659	4996 1152	PDE6A	GeneID:5145,Genbank:NM_000440.2,HGNC:HGNC:8785,MIM:180071	phosphodiesterase 6A			path:hsa00230,path:hsa04744	Purine metabolism|Phototransduction
hsa-miR-1285-3p	NM_000442.4	172	-31.04	172	-31.04	113512	22	6831	4661	PECAM1	GeneID:5175,Genbank:NM_000442.4,HGNC:HGNC:8823,MIM:173445	platelet and endothelial cell adhesion molecule 1			path:hsa04514,path:hsa04670,path:hsa05144,path:hsa05418	Cell adhesion molecules (CAMs)|Leukocyte transendothelial migration|Malaria|Fluid shear stress and atherosclerosis
hsa-miR-1285-3p	NM_000446.6	187	-33.18	187	-33.18	113516	22	2567	2458	PON1	GeneID:5444,Genbank:NM_000446.6,HGNC:HGNC:9204,MIM:168820	paraoxonase 1
hsa-miR-1285-3p	NM_000535.6	183	-33.2	183	-33.2	113597	22	5156	4051	PMS2	GeneID:5395,Genbank:NM_001322008.1,HGNC:HGNC:9122,MIM:600259	PMS1 homolog 2, mismatch repair system component			path:hsa03430,path:hsa03460	Mismatch repair|Fanconi anemia pathway
hsa-miR-1285-3p	NM_000546.5	380	-81.34	196	-43.21	113608	22	2591	2173 2336	TP53	GeneID:7157,Genbank:NM_001126112.2,HGNC:HGNC:11998,MIM:191170	tumor protein p53			path:hsa01522,path:hsa01524,path:hsa04010,path:hsa04071,path:hsa04110,path:hsa04115,path:hsa04137,path:hsa04151,path:hsa04210,path:hsa04211,path:hsa04216,path:hsa04218,path:hsa04310,path:hsa04722,path:hsa04919,path:hsa05014,path:hsa05016,path:hsa05160,path:hsa05161,path:hsa05162,path:hsa05163,path:hsa05165,path:hsa05166,path:hsa05167,path:hsa05168,path:hsa05169,path:hsa05200,path:hsa05202,path:hs…	Endocrine resistance|Platinum drug resistance|MAPK signaling pathway|Sphingolipid signaling pathway|Cell cycle|p53 signaling pathway|Mitophagy - animal|PI3K-Akt signaling pathway|Apoptosis|Longevity regulating pathway|Ferroptosis|Cellular senescence|Wnt signaling pathway|Neurotrophin signaling pathway|Thyroid hormone signaling pathway|Amyotrophic lateral sclerosis (ALS)|Huntington disease|Hepatit…
hsa-miR-1285-3p	NM_000551.3	192	-36.36	192	-36.36	113613	22	4560	3407	VHL	GeneID:7428,Genbank:NM_001354723.1,HGNC:HGNC:12687,MIM:608537	von Hippel-Lindau tumor suppressor			path:hsa04066,path:hsa04120,path:hsa05200,path:hsa05211	HIF-1 signaling pathway|Ubiquitin mediated proteolysis|Pathways in cancer|Renal cell carcinoma
hsa-miR-1285-3p	NM_000587.3	200	-40.08	200	-40.08	113644	22	5964	3486	C7	GeneID:730,Genbank:NM_000587.3,HGNC:HGNC:1346,MIM:217070	complement C7			path:hsa04610,path:hsa05020,path:hsa05322	Complement and coagulation cascades|Prion diseases|Systemic lupus erythematosus
hsa-miR-1285-3p	NM_000629.2	188	-34.14	188	-34.14	113683	22	6099	3822	IFNAR1	GeneID:3454,Genbank:XM_005260964.2,HGNC:HGNC:5432,MIM:107450	interferon alpha and beta receptor subunit 1			path:hsa04060,path:hsa04151,path:hsa04217,path:hsa04380,path:hsa04620,path:hsa04621,path:hsa04630,path:hsa04650,path:hsa05160,path:hsa05161,path:hsa05162,path:hsa05164,path:hsa05165,path:hsa05167,path:hsa05168,path:hsa05169,path:hsa05200	Cytokine-cytokine receptor interaction|PI3K-Akt signaling pathway|Necroptosis|Osteoclast differentiation|Toll-like receptor signaling pathway|NOD-like receptor signaling pathway|Jak-STAT signaling pathway|Natural killer cell mediated cytotoxicity|Hepatitis C|Hepatitis B|Measles|Influenza A|Human papillomavirus infection|Kaposi sarcoma-associated herpesvirus infection|Herpes simplex infection|Epst…
hsa-miR-1285-3p	NM_000636.3	184	-30.6	184	-30.6	113689	22	4282	2394	SOD2	GeneID:6648,Genbank:NM_001322817.1,HGNC:HGNC:11180,MIM:147460	superoxide dismutase 2			path:hsa04068,path:hsa04146,path:hsa04211,path:hsa04213,path:hsa05016	FoxO signaling pathway|Peroxisome|Longevity regulating pathway|Longevity regulating pathway - multiple species|Huntington disease
hsa-miR-1285-3p	NM_000646.2	192	-39.96	192	-39.96	113698	22	7182	156	AGL	GeneID:178,Genbank:XM_005270557.2,HGNC:HGNC:321,MIM:610860	amylo-alpha-1, 6-glucosidase, 4-alpha-glucanotransferase	GO:0004133,GO:0004134,GO:0004135,GO:0005576,GO:0005634,GO:0005737,GO:0005829,GO:0005978,GO:0005980,GO:0007584,GO:0016234,GO:0016529,GO:0030247,GO:0031593,GO:0034774,GO:0043033,GO:0043312,GO:0051384,GO:0102500,GO:1904813	glycogen debranching enzyme activity|4-alpha-glucanotransferase activity|amylo-alpha-1,6-glucosidase activity|extracellular region|nucleus|cytoplasm|cytosol|glycogen biosynthetic process|glycogen catabolic process|response to nutrient|inclusion body|sarcoplasmic reticulum|polysaccharide binding|polyubiquitin modification-dependent protein binding|secretory granule lumen|isoamylase complex|neutrop…	path:hsa00500	Starch and sucrose metabolism
hsa-miR-1285-3p	NM_000767.4	184	-33.96	184	-33.96	113799	22	3052	1723	CYP2B6	GeneID:1555,Genbank:NM_000767.4,HGNC:HGNC:2615,MIM:123930	cytochrome P450 family 2 subfamily B member 6			path:hsa00590,path:hsa00830,path:hsa00980,path:hsa00982	Arachidonic acid metabolism|Retinol metabolism|Metabolism of xenobiotics by cytochrome P450|Drug metabolism - cytochrome P450
hsa-miR-1285-3p	NM_000786.3	188	-35.89	188	-35.89	113816	22	3208	2535	CYP51A1	GeneID:1595,Genbank:NM_001146152.1,HGNC:HGNC:2649,MIM:601637	cytochrome P450 family 51 subfamily A member 1	GO:0005506,GO:0005783,GO:0005789,GO:0005886,GO:0006694,GO:0006695,GO:0008398,GO:0016020,GO:0016021,GO:0016125,GO:0020037,GO:0031090,GO:0033488,GO:0045540	iron ion binding|endoplasmic reticulum|endoplasmic reticulum membrane|plasma membrane|steroid biosynthetic process|cholesterol biosynthetic process|sterol 14-demethylase activity|membrane|integral component of membrane|sterol metabolic process|heme binding|organelle membrane|cholesterol biosynthetic process via 24,25-dihydrolanosterol|regulation of cholesterol biosynthetic process	path:hsa00100	Steroid biosynthesis
hsa-miR-1285-3p	NM_000791.3	183	-32.41	183	-32.41	113821	22	3932	1939	DHFR	GeneID:1719,Genbank:NM_001290354.1,HGNC:HGNC:2861,MIM:126060	dihydrofolate reductase			path:hsa00670,path:hsa00790,path:hsa01523	One carbon pool by folate|Folate biosynthesis|Antifolate resistance
hsa-miR-1285-3p	NM_000843.3	192	-40.55	192	-40.55	113871	22	6143	5391	GRM6	GeneID:2916,Genbank:NM_000843.3,HGNC:HGNC:4598,MIM:604096	glutamate metabotropic receptor 6	GO:0000139,GO:0001640,GO:0004930,GO:0005789,GO:0005886,GO:0005887,GO:0007186,GO:0007196,GO:0007216,GO:0007268,GO:0007626,GO:0008066,GO:0009584,GO:0030425,GO:0035841,GO:0042734,GO:0042803,GO:0050908,GO:0051966,GO:0060041,GO:0090280	Golgi membrane|adenylate cyclase inhibiting G-protein coupled glutamate receptor activity|G-protein coupled receptor activity|endoplasmic reticulum membrane|plasma membrane|integral component of plasma membrane|G-protein coupled receptor signaling pathway|adenylate cyclase-inhibiting G-protein coupled glutamate receptor signaling pathway|G-protein coupled glutamate receptor signaling pathway|chem…	path:hsa04072,path:hsa04080,path:hsa04724	Phospholipase D signaling pathway|Neuroactive ligand-receptor interaction|Glutamatergic synapse
hsa-miR-1285-3p	NM_000912.4	188	-35.89	188	-35.89	113934	22	5022	3487	OPRK1	GeneID:4986,Genbank:NM_000912.4,HGNC:HGNC:8154,MIM:165196	opioid receptor kappa 1			path:hsa04080	Neuroactive ligand-receptor interaction
hsa-miR-1285-3p	NM_000947.4	184	-34.8	184	-34.8	113968	22	2322	1867	PRIM2	GeneID:5558,Genbank:NM_001282488.1,HGNC:HGNC:9370,MIM:176636	DNA primase subunit 2	GO:0000082,GO:0003697,GO:0003887,GO:0003896,GO:0005654,GO:0005658,GO:0006269,GO:0006270,GO:0032201,GO:0046872,GO:0051539	G1/S transition of mitotic cell cycle|single-stranded DNA binding|DNA-directed DNA polymerase activity|DNA primase activity|nucleoplasm|alpha DNA polymerase:primase complex|DNA replication, synthesis of RNA primer|DNA replication initiation|telomere maintenance via semi-conservative replication|metal ion binding|4 iron, 4 sulfur cluster binding	path:hsa00230,path:hsa00240,path:hsa03030	Purine metabolism|Pyrimidine metabolism|DNA replication
hsa-miR-1285-3p	NM_000961.3	180	-31.51	180	-31.51	113981	22	5603	4361	PTGIS	GeneID:5740,Genbank:NM_000961.3,HGNC:HGNC:9603,MIM:601699	prostaglandin I2 synthase			path:hsa00590	Arachidonic acid metabolism
hsa-miR-1285-3p	NM_000991.4	188	-35.89	188	-35.89	114010	22	4245	2351	RPL28	GeneID:6158,Genbank:XM_024451636.1,HGNC:HGNC:10330,MIM:603638	ribosomal protein L28	GO:0000184,GO:0003723,GO:0003735,GO:0005829,GO:0006364,GO:0006412,GO:0006413,GO:0006614,GO:0016020,GO:0019083,GO:0022625,GO:0030425,GO:0036464,GO:0044297,GO:0070062,GO:1903146,GO:1903955	nuclear-transcribed mRNA catabolic process, nonsense-mediated decay|RNA binding|structural constituent of ribosome|cytosol|rRNA processing|translation|translational initiation|SRP-dependent cotranslational protein targeting to membrane|membrane|viral transcription|cytosolic large ribosomal subunit|dendrite|cytoplasmic ribonucleoprotein granule|cell body|extracellular exosome|regulation of autopha…	path:hsa03010	Ribosome
hsa-miR-1285-3p	NM_001001481.2	364	-69.74	184	-38.12	114060	22	8459	5381 5199	UBE2W	GeneID:55284,Genbank:NM_001271015.1,HGNC:HGNC:25616,MIM:614277	ubiquitin conjugating enzyme E2 W	GO:0004842,GO:0005524,GO:0005634,GO:0005654,GO:0005737,GO:0006281,GO:0006513,GO:0006515,GO:0016567,GO:0031625,GO:0043161,GO:0061630,GO:0070979,GO:0071218	ubiquitin-protein transferase activity|ATP binding|nucleus|nucleoplasm|cytoplasm|DNA repair|protein monoubiquitination|protein quality control for misfolded or incompletely synthesized proteins|protein ubiquitination|ubiquitin protein ligase binding|proteasome-mediated ubiquitin-dependent protein catabolic process|ubiquitin protein ligase activity|protein K11-linked ubiquitination|cellular respon…	path:hsa04120	Ubiquitin mediated proteolysis
hsa-miR-1285-3p	NM_001001563.3	177	-35.99	177	-35.99	114083	22	5481	2084	TIMM50	GeneID:92609,Genbank:NM_001001563.3,HGNC:HGNC:23656,MIM:607381	translocase of inner mitochondrial membrane 50	GO:0001836,GO:0003723,GO:0004721,GO:0004722,GO:0004725,GO:0005134,GO:0005654,GO:0005739,GO:0005743,GO:0005744,GO:0006470,GO:0007006,GO:0016021,GO:0016607,GO:0030150,GO:0043021	release of cytochrome c from mitochondria|RNA binding|phosphoprotein phosphatase activity|protein serine/threonine phosphatase activity|protein tyrosine phosphatase activity|interleukin-2 receptor binding|nucleoplasm|mitochondrion|mitochondrial inner membrane|mitochondrial inner membrane presequence translocase complex|protein dephosphorylation|mitochondrial membrane organization|integral compone…
hsa-miR-1285-3p	NM_001002033.2	176	-31.77	176	-31.77	114225	22	1705	350	JPT1	GeneID:51155,Genbank:NM_001002032.2,HGNC:HGNC:14569	Jupiter microtubule associated homolog 1	GO:0005634,GO:0005730,GO:0005737,GO:0031965	nucleus|nucleolus|cytoplasm|nuclear membrane
hsa-miR-1285-3p	NM_001003789.2	180	-34.83	180	-34.83	114353	22	2213	1625	RABL2B	GeneID:11158,Genbank:NM_007081.3,HGNC:HGNC:9800,MIM:605413	RAB, member of RAS oncogene family like 2B	GO:0000242,GO:0003924,GO:0005525,GO:0005737,GO:0005814,GO:0036064,GO:0042073,GO:0060271	pericentriolar material|GTPase activity|GTP binding|cytoplasm|centriole|ciliary basal body|intraciliary transport|cilium assembly
hsa-miR-1285-3p	NM_001006638.2	176	-34.36	176	-34.36	114839	22	2698	1731	RAB37	GeneID:326624,Genbank:NM_175738.4,HGNC:HGNC:30268,MIM:609956	RAB37, member RAS oncogene family	GO:0003924,GO:0005525,GO:0005768,GO:0005793,GO:0005886,GO:0006904,GO:0008021,GO:0009306,GO:0017157,GO:0030667,GO:0035577,GO:0035579,GO:0043312,GO:0072659	GTPase activity|GTP binding|endosome|endoplasmic reticulum-Golgi intermediate compartment|plasma membrane|vesicle docking involved in exocytosis|synaptic vesicle|protein secretion|regulation of exocytosis|secretory granule membrane|azurophil granule membrane|specific granule membrane|neutrophil degranulation|protein localization to plasma membrane
hsa-miR-1285-3p	NM_001007027.2	179	-31.59	179	-31.59	114872	22	1743	1418	ALG8	GeneID:79053,Genbank:NM_024079.4,HGNC:HGNC:23161,MIM:608103	ALG8, alpha-1,3-glucosyltransferase	GO:0000033,GO:0004583,GO:0005789,GO:0006487,GO:0006488,GO:0006490,GO:0016021,GO:0042281	alpha-1,3-mannosyltransferase activity|dolichyl-phosphate-glucose-glycolipid alpha-glucosyltransferase activity|endoplasmic reticulum membrane|protein N-linked glycosylation|dolichol-linked oligosaccharide biosynthetic process|oligosaccharide-lipid intermediate biosynthetic process|integral component of membrane|dolichyl pyrophosphate Man9GlcNAc2 alpha-1,3-glucosyltransferase activity	path:hsa00510	N-Glycan biosynthesis
hsa-miR-1285-3p	NM_001007538.1	184	-34.2	184	-34.2	114949	22	2889	1413	SHISA2	GeneID:387914,Genbank:NM_001007538.1,HGNC:HGNC:20366,MIM:617324	shisa family member 2	GO:0005789,GO:0007275,GO:0016021,GO:0030178,GO:0040037	endoplasmic reticulum membrane|multicellular organism development|integral component of membrane|negative regulation of Wnt signaling pathway|negative regulation of fibroblast growth factor receptor signaling pathway
hsa-miR-1285-3p	NM_001007561.2	184	-32.51	184	-32.51	114955	22	9703	6155	IRGQ	GeneID:126298,Genbank:NM_001007561.2,HGNC:HGNC:24868	immunity related GTPase Q	GO:0005525	GTP binding
hsa-miR-1285-3p	NM_001008493.2	180	-34.83	180	-34.83	115009	22	13190	9604	ENAH	GeneID:55740,Genbank:NM_018212.5,HGNC:HGNC:18271,MIM:609061	ENAH, actin regulator			path:hsa04360,path:hsa04810	Axon guidance|Regulation of actin cytoskeleton
hsa-miR-1285-3p	NM_001008530.2	188	-37.49	188	-37.49	115017	22	2191	214	LGMN	GeneID:5641,Genbank:NM_005606.6,HGNC:HGNC:9472,MIM:602620	legumain	GO:0002224,GO:0003014,GO:0004197,GO:0005764,GO:0005770,GO:0006508,GO:0006624,GO:0008233,GO:0010447,GO:0019886,GO:0032801,GO:0036021,GO:0040015,GO:0042359,GO:0043202,GO:0043524,GO:0045177,GO:0051603,GO:0070062,GO:1901185	toll-like receptor signaling pathway|renal system process|cysteine-type endopeptidase activity|lysosome|late endosome|proteolysis|vacuolar protein processing|peptidase activity|response to acidic pH|antigen processing and presentation of exogenous peptide antigen via MHC class II|receptor catabolic process|endolysosome lumen|negative regulation of multicellular organism growth|vitamin D metabolic…	path:hsa04142,path:hsa04612	Lysosome|Antigen processing and presentation
hsa-miR-1285-3p	NM_001009899.3	180	-31.28	180	-31.28	115107	22	13708	8497	USF3	GeneID:205717,Genbank:XM_017005872.1,HGNC:HGNC:30494,MIM:617568	upstream transcription factor family member 3	GO:0000139,GO:0003677,GO:0004571,GO:0005634,GO:0005783,GO:0006491,GO:0010719,GO:0046983	Golgi membrane|DNA binding|mannosyl-oligosaccharide 1,2-alpha-mannosidase activity|nucleus|endoplasmic reticulum|N-glycan processing|negative regulation of epithelial to mesenchymal transition|protein dimerization activity
hsa-miR-1285-3p	NM_001009909.3	182	-32.72	182	-32.72	115109	22	5311	3714	LUZP2	GeneID:338645,Genbank:XM_024448468.1,HGNC:HGNC:23206,MIM:608178	leucine zipper protein 2	GO:0005576	extracellular region
hsa-miR-1285-3p	NM_001009960.1	192	-37.92	192	-37.92	115128	22	4585	2545	ZNF655	GeneID:79027,Genbank:NM_001083956.1,HGNC:HGNC:30899,MIM:617891	zinc finger protein 655	GO:0003677,GO:0003700,GO:0005634,GO:0005730,GO:0005737,GO:0006351,GO:0006355,GO:0046872,GO:2000134	DNA binding|DNA binding transcription factor activity|nucleus|nucleolus|cytoplasm|transcription, DNA-templated|regulation of transcription, DNA-templated|metal ion binding|negative regulation of G1/S transition of mitotic cell cycle
hsa-miR-1285-3p	NM_001010846.2	188	-35.89	188	-35.89	115141	22	6186	1670	SHE	GeneID:126669,Genbank:XM_005244891.5,HGNC:HGNC:27004,MIM:610482	Src homology 2 domain containing E	GO:0005070,GO:0007165	SH3/SH2 adaptor activity|signal transduction
hsa-miR-1285-3p	NM_001010853.2	180	-30.98	180	-30.98	115146	22	4720	1934	PM20D2	GeneID:135293,Genbank:XM_011535481.3,HGNC:HGNC:21408,MIM:615913	peptidase M20 domain containing 2	GO:0005654,GO:0006508,GO:0016805,GO:0032268,GO:0070062	nucleoplasm|proteolysis|dipeptidase activity|regulation of cellular protein metabolic process|extracellular exosome
hsa-miR-1285-3p	NM_001010891.4	187	-33.67	187	-33.67	115175	22	7863	3394	MTX3	GeneID:345778,Genbank:NM_001167741.1,HGNC:HGNC:24812	metaxin 3	GO:0005741,GO:0006626	mitochondrial outer membrane|protein targeting to mitochondrion
hsa-miR-1285-3p	NM_001010980.4	188	-39.49	188	-39.49	115214	22	3991	1854	NCMAP	GeneID:400746,Genbank:NM_001010980.4,HGNC:HGNC:29332	non-compact myelin associated protein	GO:0005887,GO:0019911,GO:0031643,GO:0032290,GO:0033270,GO:0043220	integral component of plasma membrane|structural constituent of myelin sheath|positive regulation of myelination|peripheral nervous system myelin formation|paranode region of axon|Schmidt-Lanterman incisure
hsa-miR-1285-3p	NM_001011666.2	175	-32.49	175	-32.49	115244	22	7917	2805	CREB5	GeneID:9586,Genbank:NM_182899.4,HGNC:HGNC:16844	cAMP responsive element binding protein 5	GO:0003677,GO:0003700,GO:0005634,GO:0006366,GO:0045893,GO:0046872,GO:0070062	DNA binding|DNA binding transcription factor activity|nucleus|transcription from RNA polymerase II promoter|positive regulation of transcription, DNA-templated|metal ion binding|extracellular exosome	path:hsa04022,path:hsa04024,path:hsa04151,path:hsa04152,path:hsa04211,path:hsa04261,path:hsa04668,path:hsa04714,path:hsa04725,path:hsa04728,path:hsa04911,path:hsa04915,path:hsa04918,path:hsa04922,path:hsa04925,path:hsa04926,path:hsa04927,path:hsa04928,path:hsa04931,path:hsa04934,path:hsa04962,path:hsa05016,path:hsa05030,path:hsa05031,path:hsa05034,path:hsa05161,path:hsa05163,path:hsa05165,path:hs…	cGMP-PKG signaling pathway|cAMP signaling pathway|PI3K-Akt signaling pathway|AMPK signaling pathway|Longevity regulating pathway|Adrenergic signaling in cardiomyocytes|TNF signaling pathway|Thermogenesis|Cholinergic synapse|Dopaminergic synapse|Insulin secretion|Estrogen signaling pathway|Thyroid hormone synthesis|Glucagon signaling pathway|Aldosterone synthesis and secretion|Relaxin signaling pa…
hsa-miR-1285-3p	NM_001012454.5	172	-32.3	172	-32.3	115309	22	5775	1561	FAM71F2	GeneID:346653,Genbank:XM_011516136.2,HGNC:HGNC:27998	family with sequence similarity 71 member F2	GO:0005634	nucleus
hsa-miR-1285-3p	NM_001012659.1	356	-68.09	184	-35.79	115336	22	5065	2292 1685	ARGFX	GeneID:503582,Genbank:NM_001012659.1,HGNC:HGNC:30146,MIM:611164	arginine-fifty homeobox	GO:0005634,GO:0006351,GO:0006355,GO:0043565	nucleus|transcription, DNA-templated|regulation of transcription, DNA-templated|sequence-specific DNA binding
hsa-miR-1285-3p	NM_001012755.4	183	-33.2	183	-33.2	115354	22	6240	2307	SLC25A53	GeneID:401612,Genbank:NM_001012755.4,HGNC:HGNC:31894,MIM:300941	solute carrier family 25 member 53	GO:0005743,GO:0006839,GO:0016021,GO:0022857	mitochondrial inner membrane|mitochondrial transport|integral component of membrane|transmembrane transporter activity
hsa-miR-1285-3p	NM_001013615.2	180	-32.1	180	-32.1	115406	22	1863	1224	LURAP1	GeneID:541468,Genbank:NM_001013615.2,HGNC:HGNC:32327,MIM:616129	leucine rich adaptor protein 1	GO:0001819,GO:0005737,GO:0016477,GO:0031032,GO:0042641,GO:0043123,GO:0043231	positive regulation of cytokine production|cytoplasm|cell migration|actomyosin structure organization|actomyosin|positive regulation of I-kappaB kinase/NF-kappaB signaling|intracellular membrane-bounded organelle
hsa-miR-1285-3p	NM_001013619.3	192	-39.96	192	-39.96	115407	22	4226	3472	HYKK	GeneID:123688,Genbank:NM_001083612.1,HGNC:HGNC:34403,MIM:614681	hydroxylysine kinase	GO:0005759,GO:0006554,GO:0047992	mitochondrial matrix|lysine catabolic process|hydroxylysine kinase activity	path:hsa00310	Lysine degradation
hsa-miR-1285-3p	NM_001013647.1	187	-34.84	187	-34.84	115424	22	10322	3850	FAM227A	GeneID:646851,Genbank:NM_001013647.1,HGNC:HGNC:44197	family with sequence similarity 227 member A
hsa-miR-1285-3p	NM_001017368.1	192	-36.36	192	-36.36	115551	22	4137	2488	RFFL	GeneID:117584,Genbank:NM_001017368.1,HGNC:HGNC:24821,MIM:609735	ring finger and FYVE like domain containing E3 ubiquitin protein ligase	GO:0002020,GO:0002039,GO:0005654,GO:0005737,GO:0005829,GO:0005886,GO:0006511,GO:0006915,GO:0010008,GO:0010762,GO:0010804,GO:0016020,GO:0019901,GO:0031625,GO:0032006,GO:0042787,GO:0043161,GO:0046872,GO:0055038,GO:0061630,GO:0070936,GO:1901797,GO:1902042,GO:2001271	protease binding|p53 binding|nucleoplasm|cytoplasm|cytosol|plasma membrane|ubiquitin-dependent protein catabolic process|apoptotic process|endosome membrane|regulation of fibroblast migration|negative regulation of tumor necrosis factor-mediated signaling pathway|membrane|protein kinase binding|ubiquitin protein ligase binding|regulation of TOR signaling|protein ubiquitination involved in ubiquit…
hsa-miR-1285-3p	NM_001017420.2	192	-39.96	192	-39.96	115573	22	3376	2382	ESCO2	GeneID:157570,Genbank:XM_011544421.2,HGNC:HGNC:27230,MIM:609353	establishment of sister chromatid cohesion N-acetyltransferase 2	GO:0000785,GO:0001741,GO:0002244,GO:0004468,GO:0005634,GO:0005654,GO:0005794,GO:0006275,GO:0006302,GO:0007049,GO:0007059,GO:0008080,GO:0010369,GO:0030054,GO:0031618,GO:0034421,GO:0035861,GO:0046872,GO:0071168	chromatin|XY body|hematopoietic progenitor cell differentiation|lysine N-acetyltransferase activity, acting on acetyl phosphate as donor|nucleus|nucleoplasm|Golgi apparatus|regulation of DNA replication|double-strand break repair|cell cycle|chromosome segregation|N-acetyltransferase activity|chromocenter|cell junction|nuclear pericentric heterochromatin|post-translational protein acetylation|site…
hsa-miR-1285-3p	NM_001018089.2	188	-35.89	188	-35.89	115687	22	7081	3841	ICE2	GeneID:79664,Genbank:NM_001018089.2,HGNC:HGNC:29885,MIM:610835	interactor of little elongation complex ELL subunit 2	GO:0005654,GO:0005829,GO:0008023,GO:0015030,GO:0016604,GO:0035327,GO:0035363,GO:0042795,GO:0042796,GO:0045945	nucleoplasm|cytosol|transcription elongation factor complex|Cajal body|nuclear body|transcriptionally active chromatin|histone locus body|snRNA transcription from RNA polymerase II promoter|snRNA transcription from RNA polymerase III promoter|positive regulation of transcription from RNA polymerase III promoter
hsa-miR-1285-3p	NM_001024593.1	184	-30.6	184	-30.6	115755	22	2433	1632	MSS51	GeneID:118490,Genbank:NM_001024593.1,HGNC:HGNC:21000,MIM:614773	MSS51 mitochondrial translational activator	GO:0035176,GO:0046872	social behavior|metal ion binding
hsa-miR-1285-3p	NM_001025108.1	376	-73.15	192	-39.96	115836	22	8136	6810 5796	AFF3	GeneID:3899,Genbank:XM_011511171.3,HGNC:HGNC:6473,MIM:601464	AF4/FMR2 family member 3
hsa-miR-1285-3p	NM_001029864.1	184	-34.2	184	-34.2	115913	22	6412	4778	KIAA1755	GeneID:85449,Genbank:NM_001348708.1,HGNC:HGNC:29372	KIAA1755
hsa-miR-1285-3p	NM_001030288.3	184	-34.2	184	-34.2	115960	22	7313	5075	SPN	GeneID:6693,Genbank:NM_001030288.3,HGNC:HGNC:11249,MIM:182160	sialophorin	GO:0004888,GO:0005615,GO:0005886,GO:0005887,GO:0006935,GO:0006955,GO:0006968,GO:0007162,GO:0007163,GO:0007165,GO:0009986,GO:0016020,GO:0030544,GO:0031072,GO:0042535,GO:0042742,GO:0050900,GO:0070062	transmembrane signaling receptor activity|extracellular space|plasma membrane|integral component of plasma membrane|chemotaxis|immune response|cellular defense response|negative regulation of cell adhesion|establishment or maintenance of cell polarity|signal transduction|cell surface|membrane|Hsp70 protein binding|heat shock protein binding|positive regulation of tumor necrosis factor biosyntheti…	path:hsa04514	Cell adhesion molecules (CAMs)
hsa-miR-1285-3p	NM_001031720.3	187	-33.67	187	-33.67	116003	22	4122	3092	GSTCD	GeneID:79807,Genbank:XM_011532252.3,HGNC:HGNC:25806,MIM:615912	glutathione S-transferase C-terminal domain containing	GO:0005634,GO:0005654,GO:0005737,GO:0070062	nucleus|nucleoplasm|cytoplasm|extracellular exosome
hsa-miR-1285-3p	NM_001031721.3	187	-33.18	187	-33.18	116004	22	2355	112	ZNF613	GeneID:79898,Genbank:XM_011527333.2,HGNC:HGNC:25827	zinc finger protein 613	GO:0000122,GO:0003700,GO:0005634,GO:0006351,GO:0044212,GO:0045944,GO:0046872	negative regulation of transcription from RNA polymerase II promoter|DNA binding transcription factor activity|nucleus|transcription, DNA-templated|transcription regulatory region DNA binding|positive regulation of transcription from RNA polymerase II promoter|metal ion binding
hsa-miR-1285-3p	NM_001032999.2	192	-36.36	192	-36.36	116084	22	7319	3316	CBFA2T2	GeneID:9139,Genbank:XM_017028122.2,HGNC:HGNC:1536,MIM:603672	CBFA2/RUNX1 translocation partner 2	GO:0000122,GO:0003700,GO:0003714,GO:0005634,GO:0006351,GO:0010976,GO:0010977,GO:0045746,GO:0045892,GO:0046872,GO:0060575	negative regulation of transcription from RNA polymerase II promoter|DNA binding transcription factor activity|transcription corepressor activity|nucleus|transcription, DNA-templated|positive regulation of neuron projection development|negative regulation of neuron projection development|negative regulation of Notch signaling pathway|negative regulation of transcription, DNA-templated|metal ion b…
hsa-miR-1285-3p	NM_001033503.2	384	-70.68	192	-36.36	116115	22	6651	4008 4929	SAR1B	GeneID:51128,Genbank:NM_016103.3,HGNC:HGNC:10535,MIM:607690	secretion associated Ras related GTPase 1B	GO:0002474,GO:0003924,GO:0005525,GO:0005789,GO:0005829,GO:0006886,GO:0006888,GO:0012507,GO:0019886,GO:0032580,GO:0046872,GO:0048208	antigen processing and presentation of peptide antigen via MHC class I|GTPase activity|GTP binding|endoplasmic reticulum membrane|cytosol|intracellular protein transport|ER to Golgi vesicle-mediated transport|ER to Golgi transport vesicle membrane|antigen processing and presentation of exogenous peptide antigen via MHC class II|Golgi cisterna membrane|metal ion binding|COPII vesicle coating	path:hsa04141,path:hsa05134	Protein processing in endoplasmic reticulum|Legionellosis
hsa-miR-1285-3p	NM_001033554.2	187	-33.67	187	-33.67	116127	22	4901	2790	SPECC1	GeneID:92521,Genbank:XM_017025319.1,HGNC:HGNC:30615,MIM:608793	sperm antigen with calponin homology and coiled-coil domains 1
hsa-miR-1285-3p	NM_001033576.1	192	-38.79	192	-38.79	116143	22	5688	4995	UNC45B	GeneID:146862,Genbank:XM_017024234.1,HGNC:HGNC:14304,MIM:611220	unc-45 myosin chaperone B	GO:0002088,GO:0005829,GO:0007517,GO:0030154,GO:0051879,GO:0061077	lens development in camera-type eye|cytosol|muscle organ development|cell differentiation|Hsp90 protein binding|chaperone-mediated protein folding
hsa-miR-1285-3p	NM_001033930.2	372	-73.28	188	-39.08	116168	22	2825	2359 1937	UBA52	GeneID:7311,Genbank:XM_005260054.2,HGNC:HGNC:12458,MIM:191321	ubiquitin A-52 residue ribosomal protein fusion product 1	GO:0003735,GO:0005654,GO:0005783,GO:0005829,GO:0005840,GO:0005886,GO:0006412	structural constituent of ribosome|nucleoplasm|endoplasmic reticulum|cytosol|ribosome|plasma membrane|translation	path:hsa03010	Ribosome
hsa-miR-1285-3p	NM_001034.3	188	-35.89	188	-35.89	116171	22	3284	2501	RRM2	GeneID:6241,Genbank:NM_001165931.1,HGNC:HGNC:10452,MIM:180390	ribonucleotide reductase regulatory subunit M2			path:hsa00230,path:hsa00240,path:hsa00480,path:hsa00983,path:hsa04115	Purine metabolism|Pyrimidine metabolism|Glutathione metabolism|Drug metabolism - other enzymes|p53 signaling pathway
hsa-miR-1285-3p	NM_001034841.3	368	-70.25	184	-35.45	116185	22	7722	6175 6341	ITPRIPL2	GeneID:162073,Genbank:NM_001034841.3,HGNC:HGNC:27257	ITPRIP like 2	GO:0016021	integral component of membrane
hsa-miR-1285-3p	NM_001037232.3	188	-35.89	188	-35.89	116240	22	5056	2307	ZNF829	GeneID:374899,Genbank:XM_011526933.2,HGNC:HGNC:34032	zinc finger protein 829	GO:0003677,GO:0003700,GO:0005634,GO:0006351,GO:0006355,GO:0046872	DNA binding|DNA binding transcription factor activity|nucleus|transcription, DNA-templated|regulation of transcription, DNA-templated|metal ion binding
hsa-miR-1285-3p	NM_001037330.2	180	-33.49	180	-33.49	116254	22	2049	1606	TRIM16L	GeneID:147166,Genbank:XM_017024247.1,HGNC:HGNC:32670	tripartite motif containing 16 like	GO:0003677,GO:0005737,GO:0008270,GO:0016605,GO:0019966,GO:0032089,GO:0032526,GO:0043966,GO:0043967,GO:0045618,GO:0045893,GO:0046683,GO:0048386,GO:0050718,GO:0060416	DNA binding|cytoplasm|zinc ion binding|PML body|interleukin-1 binding|NACHT domain binding|response to retinoic acid|histone H3 acetylation|histone H4 acetylation|positive regulation of keratinocyte differentiation|positive regulation of transcription, DNA-templated|response to organophosphorus|positive regulation of retinoic acid receptor signaling pathway|positive regulation of interleukin-1 be…
hsa-miR-1285-3p	NM_001037813.3	176	-35.11	176	-35.11	116301	22	4368	3883	ZNF284	GeneID:342909,Genbank:XM_024451486.1,HGNC:HGNC:13078	zinc finger protein 284	GO:0003677,GO:0003700,GO:0005634,GO:0006351,GO:0006355,GO:0046872	DNA binding|DNA binding transcription factor activity|nucleus|transcription, DNA-templated|regulation of transcription, DNA-templated|metal ion binding
hsa-miR-1285-3p	NM_001039.3	187	-34.84	187	-34.84	116320	22	3516	3277	SCNN1G	GeneID:6340,Genbank:NM_001039.3,HGNC:HGNC:10602,MIM:600761	sodium channel epithelial 1 gamma subunit	GO:0005216,GO:0005272,GO:0005654,GO:0005886,GO:0005887,GO:0006814,GO:0007588,GO:0009897,GO:0015280,GO:0016324,GO:0034220,GO:0034706,GO:0035725,GO:0050699,GO:0050891,GO:0050896,GO:0050909,GO:0055078,GO:0070062	ion channel activity|sodium channel activity|nucleoplasm|plasma membrane|integral component of plasma membrane|sodium ion transport|excretion|external side of plasma membrane|ligand-gated sodium channel activity|apical plasma membrane|ion transmembrane transport|sodium channel complex|sodium ion transmembrane transport|WW domain binding|multicellular organismal water homeostasis|response to stimu…	path:hsa04742,path:hsa04960	Taste transduction|Aldosterone-regulated sodium reabsorption
hsa-miR-1285-3p	NM_001039211.2	177	-34.23	177	-34.23	116338	22	3859	3267	ATAD3C	GeneID:219293,Genbank:NM_001039211.2,HGNC:HGNC:32151,MIM:617227	ATPase family, AAA domain containing 3C	GO:0005524,GO:0005739	ATP binding|mitochondrion
hsa-miR-1285-3p	NM_001039547.2	184	-34.2	184	-34.2	116375	22	9855	3541	GK5	GeneID:256356,Genbank:NM_001039547.2,HGNC:HGNC:28635	glycerol kinase 5 (putative)	GO:0004370,GO:0005524,GO:0005739,GO:0006071,GO:0006641,GO:0019563,GO:0046167	glycerol kinase activity|ATP binding|mitochondrion|glycerol metabolic process|triglyceride metabolic process|glycerol catabolic process|glycerol-3-phosphate biosynthetic process
hsa-miR-1285-3p	NM_001039697.1	182	-32.72	182	-32.72	116415	22	3095	1880	SNAPC3	GeneID:6619,Genbank:NM_001039697.1,HGNC:HGNC:11136,MIM:602348	small nuclear RNA activating complex polypeptide 3	GO:0003677,GO:0005634,GO:0005654,GO:0005730,GO:0006355,GO:0006366,GO:0006383,GO:0009301,GO:0016604,GO:0042795	DNA binding|nucleus|nucleoplasm|nucleolus|regulation of transcription, DNA-templated|transcription from RNA polymerase II promoter|transcription from RNA polymerase III promoter|snRNA transcription|nuclear body|snRNA transcription from RNA polymerase II promoter
hsa-miR-1285-3p	NM_001039709.1	192	-36.36	192	-36.36	116422	22	7449	3446	CBFA2T2	GeneID:9139,Genbank:XM_017028122.2,HGNC:HGNC:1536,MIM:603672	CBFA2/RUNX1 translocation partner 2	GO:0000122,GO:0003700,GO:0003714,GO:0005634,GO:0006351,GO:0010976,GO:0010977,GO:0045746,GO:0045892,GO:0046872,GO:0060575	negative regulation of transcription from RNA polymerase II promoter|DNA binding transcription factor activity|transcription corepressor activity|nucleus|transcription, DNA-templated|positive regulation of neuron projection development|negative regulation of neuron projection development|negative regulation of Notch signaling pathway|negative regulation of transcription, DNA-templated|metal ion b…
hsa-miR-1285-3p	NM_001039802.1	192	-36.36	192	-36.36	116439	22	2308	120	CDC42	GeneID:998,Genbank:NM_001039802.1,HGNC:HGNC:1736,MIM:116952	cell division cycle 42	GO:0003924,GO:0005525,GO:0005737,GO:0005815,GO:0006911,GO:0007015,GO:0007264,GO:0016020,GO:0030496,GO:0031258,GO:0032467,GO:0034329,GO:0045198,GO:0051233,GO:0051489,GO:0051491,GO:0051988,GO:0060997,GO:0072686,GO:1900026	GTPase activity|GTP binding|cytoplasm|microtubule organizing center|phagocytosis, engulfment|actin filament organization|small GTPase mediated signal transduction|membrane|midbody|lamellipodium membrane|positive regulation of cytokinesis|cell junction assembly|establishment of epithelial cell apical/basal polarity|spindle midzone|regulation of filopodium assembly|positive regulation of filopodium…	path:hsa04010,path:hsa04014,path:hsa04015,path:hsa04062,path:hsa04144,path:hsa04360,path:hsa04370,path:hsa04510,path:hsa04520,path:hsa04530,path:hsa04660,path:hsa04666,path:hsa04670,path:hsa04722,path:hsa04810,path:hsa04912,path:hsa04932,path:hsa04933,path:hsa05100,path:hsa05120,path:hsa05130,path:hsa05131,path:hsa05132,path:hsa05165,path:hsa05200,path:hsa05203,path:hsa05205,path:hsa05211,path:hs…	MAPK signaling pathway|Ras signaling pathway|Rap1 signaling pathway|Chemokine signaling pathway|Endocytosis|Axon guidance|VEGF signaling pathway|Focal adhesion|Adherens junction|Tight junction|T cell receptor signaling pathway|Fc gamma R-mediated phagocytosis|Leukocyte transendothelial migration|Neurotrophin signaling pathway|Regulation of actin cytoskeleton|GnRH signaling pathway|Non-alcoholic f…
hsa-miR-1285-3p	NM_001039844.2	180	-34.83	180	-34.83	116444	22	3383	3044	ACBD7	GeneID:414149,Genbank:NM_001039844.2,HGNC:HGNC:17715	acyl-CoA binding domain containing 7	GO:0000062,GO:0008289	fatty-acyl-CoA binding|lipid binding
hsa-miR-1285-3p	NM_001039891.2	184	-34.2	184	-34.2	116455	22	4095	2707	ZNF674	GeneID:641339,Genbank:NM_001146291.1,HGNC:HGNC:17625,MIM:300573	zinc finger protein 674	GO:0003677,GO:0005634,GO:0006351,GO:0006355,GO:0046872	DNA binding|nucleus|transcription, DNA-templated|regulation of transcription, DNA-templated|metal ion binding
hsa-miR-1285-3p	NM_001040061.2	192	-36.36	192	-36.36	116487	22	4075	3131	FOXL2NB	GeneID:401089,Genbank:NM_001040061.2,HGNC:HGNC:34428	FOXL2 neighbor	GO:0001650	fibrillar center
hsa-miR-1285-3p	NM_001040157.2	547	-100.77	184	-33.91	116519	22	4535	3038 2291 3203	CEP44	GeneID:80817,Genbank:XM_011532286.2,HGNC:HGNC:29356	centrosomal protein 44	GO:0000922,GO:0005737,GO:0005813,GO:0030496	spindle pole|cytoplasm|centrosome|midbody
hsa-miR-1285-3p	NM_001040185.2	187	-33.67	187	-33.67	116536	22	4588	3895	ZNF765	GeneID:91661,Genbank:NM_001040185.2,HGNC:HGNC:25092	zinc finger protein 765	GO:0003677,GO:0003700,GO:0005634,GO:0006351,GO:0006355,GO:0046872	DNA binding|DNA binding transcription factor activity|nucleus|transcription, DNA-templated|regulation of transcription, DNA-templated|metal ion binding
hsa-miR-1285-3p	NM_001040647.1	188	-35.89	188	-35.89	116605	22	2721	2340	CRCP	GeneID:27297,Genbank:NM_014478.4,HGNC:HGNC:17888,MIM:606121	CGRP receptor component	GO:0000166,GO:0001635,GO:0001669,GO:0003899,GO:0005654,GO:0005666,GO:0005829,GO:0005886,GO:0006383,GO:0006384,GO:0007218,GO:0009360,GO:0032481,GO:0045087,GO:0051607	nucleotide binding|calcitonin gene-related peptide receptor activity|acrosomal vesicle|DNA-directed 5'-3' RNA polymerase activity|nucleoplasm|DNA-directed RNA polymerase III complex|cytosol|plasma membrane|transcription from RNA polymerase III promoter|transcription initiation from RNA polymerase III promoter|neuropeptide signaling pathway|DNA polymerase III complex|positive regulation of type I …
hsa-miR-1285-3p	NM_001040648.1	188	-35.89	188	-35.89	116606	22	2589	2208	CRCP	GeneID:27297,Genbank:NM_014478.4,HGNC:HGNC:17888,MIM:606121	CGRP receptor component	GO:0000166,GO:0001635,GO:0001669,GO:0003899,GO:0005654,GO:0005666,GO:0005829,GO:0005886,GO:0006383,GO:0006384,GO:0007218,GO:0009360,GO:0032481,GO:0045087,GO:0051607	nucleotide binding|calcitonin gene-related peptide receptor activity|acrosomal vesicle|DNA-directed 5'-3' RNA polymerase activity|nucleoplasm|DNA-directed RNA polymerase III complex|cytosol|plasma membrane|transcription from RNA polymerase III promoter|transcription initiation from RNA polymerase III promoter|neuropeptide signaling pathway|DNA polymerase III complex|positive regulation of type I …
hsa-miR-1285-3p	NM_001042469.1	363	-66.95	183	-34.37	116702	22	2019	1791 1627	SUMF2	GeneID:25870,Genbank:XM_017011940.1,HGNC:HGNC:20415,MIM:607940	sulfatase modifying factor 2	GO:0005783,GO:0005788,GO:0043687,GO:0046872	endoplasmic reticulum|endoplasmic reticulum lumen|post-translational protein modification|metal ion binding
hsa-miR-1285-3p	NM_001042470.1	363	-66.95	183	-34.37	116703	22	1812	1584 1420	SUMF2	GeneID:25870,Genbank:XM_017011940.1,HGNC:HGNC:20415,MIM:607940	sulfatase modifying factor 2	GO:0005783,GO:0005788,GO:0043687,GO:0046872	endoplasmic reticulum|endoplasmic reticulum lumen|post-translational protein modification|metal ion binding
hsa-miR-1285-3p	NM_001042494.1	183	-33.2	183	-33.2	116719	22	7688	6328	SLC12A6	GeneID:9990,Genbank:NM_001042495.1,HGNC:HGNC:10914,MIM:604878	solute carrier family 12 member 6	GO:0001525,GO:0005886,GO:0005887,GO:0006811,GO:0007268,GO:0010107,GO:0015079,GO:0015379,GO:0016021,GO:0016323,GO:0019901,GO:0022820,GO:0035826,GO:0035827,GO:0071476,GO:0071477	angiogenesis|plasma membrane|integral component of plasma membrane|ion transport|chemical synaptic transmission|potassium ion import|potassium ion transmembrane transporter activity|potassium:chloride symporter activity|integral component of membrane|basolateral plasma membrane|protein kinase binding|potassium ion symporter activity|rubidium ion transport|rubidium ion transmembrane transporter ac…
hsa-miR-1285-3p	NM_001042495.1	183	-33.2	183	-33.2	116720	22	7363	6003	SLC12A6	GeneID:9990,Genbank:NM_001042495.1,HGNC:HGNC:10914,MIM:604878	solute carrier family 12 member 6	GO:0001525,GO:0005886,GO:0005887,GO:0006811,GO:0007268,GO:0010107,GO:0015079,GO:0015379,GO:0016021,GO:0016323,GO:0019901,GO:0022820,GO:0035826,GO:0035827,GO:0071476,GO:0071477	angiogenesis|plasma membrane|integral component of plasma membrane|ion transport|chemical synaptic transmission|potassium ion import|potassium ion transmembrane transporter activity|potassium:chloride symporter activity|integral component of membrane|basolateral plasma membrane|protein kinase binding|potassium ion symporter activity|rubidium ion transport|rubidium ion transmembrane transporter ac…
hsa-miR-1285-3p	NM_001042496.1	183	-33.2	183	-33.2	116721	22	7754	6394	SLC12A6	GeneID:9990,Genbank:NM_001042495.1,HGNC:HGNC:10914,MIM:604878	solute carrier family 12 member 6	GO:0001525,GO:0005886,GO:0005887,GO:0006811,GO:0007268,GO:0010107,GO:0015079,GO:0015379,GO:0016021,GO:0016323,GO:0019901,GO:0022820,GO:0035826,GO:0035827,GO:0071476,GO:0071477	angiogenesis|plasma membrane|integral component of plasma membrane|ion transport|chemical synaptic transmission|potassium ion import|potassium ion transmembrane transporter activity|potassium:chloride symporter activity|integral component of membrane|basolateral plasma membrane|protein kinase binding|potassium ion symporter activity|rubidium ion transport|rubidium ion transmembrane transporter ac…
hsa-miR-1285-3p	NM_001042497.1	183	-33.2	183	-33.2	116722	22	7457	6097	SLC12A6	GeneID:9990,Genbank:NM_001042495.1,HGNC:HGNC:10914,MIM:604878	solute carrier family 12 member 6	GO:0001525,GO:0005886,GO:0005887,GO:0006811,GO:0007268,GO:0010107,GO:0015079,GO:0015379,GO:0016021,GO:0016323,GO:0019901,GO:0022820,GO:0035826,GO:0035827,GO:0071476,GO:0071477	angiogenesis|plasma membrane|integral component of plasma membrane|ion transport|chemical synaptic transmission|potassium ion import|potassium ion transmembrane transporter activity|potassium:chloride symporter activity|integral component of membrane|basolateral plasma membrane|protein kinase binding|potassium ion symporter activity|rubidium ion transport|rubidium ion transmembrane transporter ac…
hsa-miR-1285-3p	NM_001042552.2	183	-33.2	183	-33.2	116751	22	2588	1310	TATDN3	GeneID:128387,Genbank:NM_001146171.1,HGNC:HGNC:27010	TatD DNase domain containing 3	GO:0004518,GO:0005634,GO:0046872	nuclease activity|nucleus|metal ion binding
hsa-miR-1285-3p	NM_001042553.2	183	-33.2	183	-33.2	116752	22	2585	1307	TATDN3	GeneID:128387,Genbank:NM_001146171.1,HGNC:HGNC:27010	TatD DNase domain containing 3	GO:0004518,GO:0005634,GO:0046872	nuclease activity|nucleus|metal ion binding
hsa-miR-1285-3p	NM_001042717.2	188	-37.83	188	-37.83	116803	22	7313	5831	GTPBP10	GeneID:85865,Genbank:NM_033107.3,HGNC:HGNC:25106,MIM:610920	GTP binding protein 10	GO:0003723,GO:0005525,GO:0005694,GO:0005730,GO:0005739,GO:0042254	RNA binding|GTP binding|chromosome|nucleolus|mitochondrion|ribosome biogenesis
hsa-miR-1285-3p	NM_001042762.3	180	-34.83	180	-34.83	116813	22	10371	4149	FIGNL1	GeneID:63979,Genbank:NM_001287495.2,HGNC:HGNC:13286,MIM:615383	fidgetin like 1	GO:0000228,GO:0000287,GO:0001649,GO:0005524,GO:0005634,GO:0005737,GO:0007140,GO:0010569,GO:0016787,GO:0033687,GO:0043066,GO:0046034,GO:0048471,GO:0051726,GO:0070062,GO:0071479,GO:2001243	nuclear chromosome|magnesium ion binding|osteoblast differentiation|ATP binding|nucleus|cytoplasm|male meiotic nuclear division|regulation of double-strand break repair via homologous recombination|hydrolase activity|osteoblast proliferation|negative regulation of apoptotic process|ATP metabolic process|perinuclear region of cytoplasm|regulation of cell cycle|extracellular exosome|cellular respon…
hsa-miR-1285-3p	NM_001056.3	184	-34.2	184	-34.2	116886	22	2799	2523	SULT1C2	GeneID:6819,Genbank:NM_176825.2,HGNC:HGNC:11456,MIM:602385	sulfotransferase family 1C member 2	GO:0004062,GO:0005737,GO:0005829,GO:0008146,GO:0009308,GO:0050427,GO:0051923,GO:0070062	aryl sulfotransferase activity|cytoplasm|cytosol|sulfotransferase activity|amine metabolic process|3'-phosphoadenosine 5'-phosphosulfate metabolic process|sulfation|extracellular exosome
hsa-miR-1285-3p	NM_001076781.2	184	-34.79	184	-34.79	116921	22	4082	2803	ZNF391	GeneID:346157,Genbank:NM_001322288.1,HGNC:HGNC:18779	zinc finger protein 391	GO:0003677,GO:0003700,GO:0005634,GO:0006351,GO:0006355,GO:0046872	DNA binding|DNA binding transcription factor activity|nucleus|transcription, DNA-templated|regulation of transcription, DNA-templated|metal ion binding
hsa-miR-1285-3p	NM_001077196.1	182	-30.99	182	-30.99	116935	22	7786	3188	PDE11A	GeneID:50940,Genbank:NM_001077197.1,HGNC:HGNC:8773,MIM:604961	phosphodiesterase 11A			path:hsa00230,path:hsa04934,path:hsa05032	Purine metabolism|Cushing syndrome|Morphine addiction
hsa-miR-1285-3p	NM_001077197.1	182	-30.99	182	-30.99	116936	22	8316	3718	PDE11A	GeneID:50940,Genbank:NM_001077197.1,HGNC:HGNC:8773,MIM:604961	phosphodiesterase 11A			path:hsa00230,path:hsa04934,path:hsa05032	Purine metabolism|Cushing syndrome|Morphine addiction
hsa-miR-1285-3p	NM_001079512.3	184	-37.97	184	-37.97	117050	22	3397	1445	TVP23A	GeneID:780776,Genbank:XM_006720944.3,HGNC:HGNC:20398	trans-golgi network vesicle protein 23 homolog A	GO:0009306,GO:0016192,GO:0030173	protein secretion|vesicle-mediated transport|integral component of Golgi membrane
hsa-miR-1285-3p	NM_001079867.1	200	-44.27	200	-44.27	117110	22	4360	3307	PEX2	GeneID:5828,Genbank:NM_001172087.1,HGNC:HGNC:9717,MIM:170993	peroxisomal biogenesis factor 2	GO:0000038,GO:0000122,GO:0005778,GO:0005779,GO:0006635,GO:0007031,GO:0016020,GO:0016558,GO:0016567,GO:0016593,GO:0031648,GO:0046872,GO:0048147,GO:0050680,GO:0061630	very long-chain fatty acid metabolic process|negative regulation of transcription from RNA polymerase II promoter|peroxisomal membrane|integral component of peroxisomal membrane|fatty acid beta-oxidation|peroxisome organization|membrane|protein import into peroxisome matrix|protein ubiquitination|Cdc73/Paf1 complex|protein destabilization|metal ion binding|negative regulation of fibroblast prolif…	path:hsa04146	Peroxisome
hsa-miR-1285-3p	NM_001079877.2	192	-36.36	192	-36.36	117115	22	5468	4278	RASA4	GeneID:10156,Genbank:NM_001079877.2,HGNC:HGNC:23181,MIM:607943	RAS p21 protein activator 4	GO:0000165,GO:0005096,GO:0005829,GO:0031235,GO:0034260,GO:0046580,GO:0046872,GO:0071277	MAPK cascade|GTPase activator activity|cytosol|intrinsic component of the cytoplasmic side of the plasma membrane|negative regulation of GTPase activity|negative regulation of Ras protein signal transduction|metal ion binding|cellular response to calcium ion	path:hsa04014	Ras signaling pathway
hsa-miR-1285-3p	NM_001080391.1	187	-33.67	187	-33.67	117151	22	5455	4364	SP100	GeneID:6672,Genbank:NM_001080391.1,HGNC:HGNC:11206,MIM:604585	SP100 nuclear antigen	GO:0000122,GO:0000723,GO:0000784,GO:0003677,GO:0003713,GO:0003714,GO:0005634,GO:0005654,GO:0005730,GO:0005737,GO:0006351,GO:0006978,GO:0008134,GO:0010596,GO:0016032,GO:0016604,GO:0016605,GO:0019900,GO:0019904,GO:0032526,GO:0032897,GO:0034097,GO:0034340,GO:0034341,GO:0034399,GO:0042802,GO:0042803,GO:0043392,GO:0043433,GO:0045185,GO:0045765,GO:0045892,GO:0045893,GO:0046826,GO:0048384,GO:0051091,GO:…	negative regulation of transcription from RNA polymerase II promoter|telomere maintenance|nuclear chromosome, telomeric region|DNA binding|transcription coactivator activity|transcription corepressor activity|nucleus|nucleoplasm|nucleolus|cytoplasm|transcription, DNA-templated|DNA damage response, signal transduction by p53 class mediator resulting in transcription of p21 class mediator|transcrip…	path:hsa05168,path:hsa05203	Herpes simplex infection|Viral carcinogenesis
hsa-miR-1285-3p	NM_001080825.2	192	-39.96	192	-39.96	117296	22	7510	2747	TMEM120B	GeneID:144404,Genbank:NM_001080825.2,HGNC:HGNC:32008,MIM:616551	transmembrane protein 120B	GO:0005637,GO:0016021,GO:0045444,GO:0051291	nuclear inner membrane|integral component of membrane|fat cell differentiation|protein heterooligomerization
hsa-miR-1285-3p	NM_001083621.1	180	-37.06	180	-37.06	117409	22	8992	6561	ZBTB40	GeneID:9923,Genbank:XM_011542499.2,HGNC:HGNC:29045,MIM:612106	zinc finger and BTB domain containing 40	GO:0003677,GO:0005634,GO:0006351,GO:0006355,GO:0006974,GO:0030282,GO:0046872	DNA binding|nucleus|transcription, DNA-templated|regulation of transcription, DNA-templated|cellular response to DNA damage stimulus|bone mineralization|metal ion binding
hsa-miR-1285-3p	NM_001083956.1	192	-37.92	192	-37.92	117425	22	4863	2823	ZNF655	GeneID:79027,Genbank:NM_001083956.1,HGNC:HGNC:30899,MIM:617891	zinc finger protein 655	GO:0003677,GO:0003700,GO:0005634,GO:0005730,GO:0005737,GO:0006351,GO:0006355,GO:0046872,GO:2000134	DNA binding|DNA binding transcription factor activity|nucleus|nucleolus|cytoplasm|transcription, DNA-templated|regulation of transcription, DNA-templated|metal ion binding|negative regulation of G1/S transition of mitotic cell cycle
hsa-miR-1285-3p	NM_001085368.1	192	-37.92	192	-37.92	117442	22	4690	2650	ZNF655	GeneID:79027,Genbank:NM_001083956.1,HGNC:HGNC:30899,MIM:617891	zinc finger protein 655	GO:0003677,GO:0003700,GO:0005634,GO:0005730,GO:0005737,GO:0006351,GO:0006355,GO:0046872,GO:2000134	DNA binding|DNA binding transcription factor activity|nucleus|nucleolus|cytoplasm|transcription, DNA-templated|regulation of transcription, DNA-templated|metal ion binding|negative regulation of G1/S transition of mitotic cell cycle
hsa-miR-1285-3p	NM_001085423.1	192	-36.36	192	-36.36	117454	22	1488	1118	MILR1	GeneID:284021,Genbank:XM_024450706.1,HGNC:HGNC:27570	mast cell immunoglobulin like receptor 1	GO:0005887,GO:0033004,GO:0042629,GO:0043303	integral component of plasma membrane|negative regulation of mast cell activation|mast cell granule|mast cell degranulation
hsa-miR-1285-3p	NM_001098175.1	360	-60.91	184	-30.6	117545	22	12615	5658 4623	ENTPD1	GeneID:953,Genbank:XM_011540371.2,HGNC:HGNC:3363,MIM:601752	ectonucleoside triphosphate diphosphohydrolase 1	GO:0005524,GO:0005886,GO:0005887,GO:0007155,GO:0007596,GO:0016020,GO:0017110,GO:0017111,GO:0034656,GO:0070062,GO:0102485,GO:0102486,GO:0102487,GO:0102488,GO:0102489,GO:0102490,GO:0102491	ATP binding|plasma membrane|integral component of plasma membrane|cell adhesion|blood coagulation|membrane|nucleoside-diphosphatase activity|nucleoside-triphosphatase activity|nucleobase-containing small molecule catabolic process|extracellular exosome|dATP phosphohydrolase activity|dCTP phosphohydrolase activity|dUTP phosphohydrolase activity|dTTP phosphohydrolase activity|GTP phosphohydrolase a…	path:hsa00230,path:hsa00240,path:hsa05169	Purine metabolism|Pyrimidine metabolism|Epstein-Barr virus infection
hsa-miR-1285-3p	NM_001098482.1	184	-34.2	184	-34.2	117583	22	7009	5378	CRTC1	GeneID:23373,Genbank:NM_001098482.1,HGNC:HGNC:16062,MIM:607536	CREB regulated transcription coactivator 1			path:hsa05166	Human T-cell leukemia virus 1 infection
hsa-miR-1285-3p	NM_001098540.2	180	-31.18	180	-31.18	117627	22	4630	2322	HPSE	GeneID:10855,Genbank:NM_001166498.2,HGNC:HGNC:5164,MIM:604724	heparanase	GO:0004566,GO:0005576,GO:0005578,GO:0005634,GO:0005654,GO:0005764,GO:0005765,GO:0006027,GO:0006029,GO:0007160,GO:0010575,GO:0030194,GO:0030200,GO:0030305,GO:0033690,GO:0035580,GO:0043202,GO:0043231,GO:0043312,GO:0045121,GO:0045545,GO:0046983,GO:0051797,GO:0051798,GO:0051897,GO:0060055,GO:0061042	beta-glucuronidase activity|extracellular region|proteinaceous extracellular matrix|nucleus|nucleoplasm|lysosome|lysosomal membrane|glycosaminoglycan catabolic process|proteoglycan metabolic process|cell-matrix adhesion|positive regulation of vascular endothelial growth factor production|positive regulation of blood coagulation|heparan sulfate proteoglycan catabolic process|heparanase activity|po…	path:hsa00531,path:hsa05205	Glycosaminoglycan degradation|Proteoglycans in cancer
hsa-miR-1285-3p	NM_001098816.2	192	-39.96	192	-39.96	117681	22	13566	11327	TENM4	GeneID:26011,Genbank:XM_017017525.1,HGNC:HGNC:29945,MIM:610084	teneurin transmembrane protein 4	GO:0000902,GO:0001702,GO:0005634,GO:0005737,GO:0005886,GO:0005887,GO:0007157,GO:0007165,GO:0031641,GO:0031643,GO:0032289,GO:0042803,GO:0043005,GO:0046982,GO:0048666,GO:0048714,GO:0050839,GO:0060038,GO:0060912,GO:0097264,GO:2000543	cell morphogenesis|gastrulation with mouth forming second|nucleus|cytoplasm|plasma membrane|integral component of plasma membrane|heterophilic cell-cell adhesion via plasma membrane cell adhesion molecules|signal transduction|regulation of myelination|positive regulation of myelination|central nervous system myelin formation|protein homodimerization activity|neuron projection|protein heterodimeri…
hsa-miR-1285-3p	NM_001098831.1	176	-30.18	176	-30.18	117690	22	2352	29	MORN4	GeneID:118812,Genbank:NM_001098831.1,HGNC:HGNC:24001,MIM:617736	MORN repeat containing 4	GO:0005737,GO:0032426,GO:0032433,GO:0048678	cytoplasm|stereocilium tip|filopodium tip|response to axon injury
hsa-miR-1285-3p	NM_001099401.1	175	-31.96	175	-31.96	117729	22	1784	1368	SGCE	GeneID:8910,Genbank:NM_001301139.1,HGNC:HGNC:10808,MIM:604149	sarcoglycan epsilon	GO:0003012,GO:0005794,GO:0005856,GO:0005886,GO:0005887,GO:0007160,GO:0007517,GO:0016010,GO:0016012,GO:0032590,GO:0042383,GO:0061024	muscle system process|Golgi apparatus|cytoskeleton|plasma membrane|integral component of plasma membrane|cell-matrix adhesion|muscle organ development|dystrophin-associated glycoprotein complex|sarcoglycan complex|dendrite membrane|sarcolemma|membrane organization
hsa-miR-1285-3p	NM_001099791.2	188	-33.56	188	-33.56	117823	22	2967	618	SYS1	GeneID:90196,Genbank:NM_001197129.1,HGNC:HGNC:16162,MIM:612979	SYS1, golgi trafficking protein	GO:0000042,GO:0005802,GO:0005829,GO:0006895,GO:0030173,GO:0032588,GO:0043001	protein targeting to Golgi|trans-Golgi network|cytosol|Golgi to endosome transport|integral component of Golgi membrane|trans-Golgi network membrane|Golgi to plasma membrane protein transport
hsa-miR-1285-3p	NM_001100389.1	188	-35.89	188	-35.89	117854	22	4511	2835	TMEM192	GeneID:201931,Genbank:XM_011531717.3,HGNC:HGNC:26775	transmembrane protein 192	GO:0005654,GO:0005764,GO:0005765,GO:0005768,GO:0005770,GO:0016021,GO:0042803,GO:0048471,GO:0070062	nucleoplasm|lysosome|lysosomal membrane|endosome|late endosome|integral component of membrane|protein homodimerization activity|perinuclear region of cytoplasm|extracellular exosome
hsa-miR-1285-3p	NM_001100422.1	184	-36.51	184	-36.51	117872	22	6335	4619	SPATS2L	GeneID:26010,Genbank:NM_001282735.1,HGNC:HGNC:24574,MIM:613817	spermatogenesis associated serine rich 2 like	GO:0003723,GO:0005634,GO:0005730,GO:0005829,GO:0043234	RNA binding|nucleus|nucleolus|cytosol|protein complex
hsa-miR-1285-3p	NM_001100423.1	184	-36.51	184	-36.51	117873	22	6285	4569	SPATS2L	GeneID:26010,Genbank:NM_001282735.1,HGNC:HGNC:24574,MIM:613817	spermatogenesis associated serine rich 2 like	GO:0003723,GO:0005634,GO:0005730,GO:0005829,GO:0043234	RNA binding|nucleus|nucleolus|cytosol|protein complex
hsa-miR-1285-3p	NM_001100424.1	184	-36.51	184	-36.51	117874	22	6128	4412	SPATS2L	GeneID:26010,Genbank:NM_001282735.1,HGNC:HGNC:24574,MIM:613817	spermatogenesis associated serine rich 2 like	GO:0003723,GO:0005634,GO:0005730,GO:0005829,GO:0043234	RNA binding|nucleus|nucleolus|cytosol|protein complex
hsa-miR-1285-3p	NM_001100595.1	192	-36.36	192	-36.36	117886	22	2988	2135	SKA2	GeneID:348235,Genbank:NM_001330399.1,HGNC:HGNC:28006,MIM:616674	spindle and kinetochore associated complex subunit 2	GO:0000278,GO:0000940,GO:0005829,GO:0005876,GO:0007059,GO:0007062,GO:0008017,GO:0031110,GO:0051301	mitotic cell cycle|condensed chromosome outer kinetochore|cytosol|spindle microtubule|chromosome segregation|sister chromatid cohesion|microtubule binding|regulation of microtubule polymerization or depolymerization|cell division
hsa-miR-1285-3p	NM_001100624.2	172	-30.44	172	-30.44	117897	22	4663	2924	CENPN	GeneID:55839,Genbank:NM_001100625.2,HGNC:HGNC:30873,MIM:611509	centromere protein N	GO:0000777,GO:0005634,GO:0005654,GO:0005829,GO:0007062,GO:0034080	condensed chromosome kinetochore|nucleus|nucleoplasm|cytosol|sister chromatid cohesion|CENP-A containing nucleosome assembly
hsa-miR-1285-3p	NM_001100829.2	183	-33.2	183	-33.2	117906	22	8413	4927	TMEM170B	GeneID:100113407,Genbank:NM_001100829.2,HGNC:HGNC:34244	transmembrane protein 170B	GO:0016021	integral component of membrane
hsa-miR-1285-3p	NM_001100913.2	184	-30.6	184	-30.6	117918	22	6712	5072	PACS2	GeneID:23241,Genbank:XM_017021112.2,HGNC:HGNC:23794,MIM:610423	phosphofurin acidic cluster sorting protein 2	GO:0000045,GO:0005739,GO:0005783,GO:0006915,GO:0016032,GO:0034497,GO:0044325,GO:0072659	autophagosome assembly|mitochondrion|endoplasmic reticulum|apoptotic process|viral process|protein localization to phagophore assembly site|ion channel binding|protein localization to plasma membrane
hsa-miR-1285-3p	NM_001102601.2	180	-35.64	180	-35.64	117997	22	2104	1510	CCDC163	GeneID:126661,Genbank:NM_001358407.1,HGNC:HGNC:27003	coiled-coil domain containing 163
hsa-miR-1285-3p	NM_001103146.1	183	-32.37	183	-32.37	118016	22	7819	7424	GIGYF2	GeneID:26058,Genbank:NM_015575.3,HGNC:HGNC:11960,MIM:612003	GRB10 interacting GYF protein 2	GO:0003723,GO:0005768,GO:0005783,GO:0005794,GO:0005829,GO:0007631,GO:0008344,GO:0009791,GO:0010494,GO:0016020,GO:0016021,GO:0016441,GO:0017148,GO:0021522,GO:0031571,GO:0035264,GO:0043204,GO:0043234,GO:0044267,GO:0045296,GO:0048009,GO:0048873,GO:0050881,GO:0050885,GO:0061157,GO:0070064,GO:1990635	RNA binding|endosome|endoplasmic reticulum|Golgi apparatus|cytosol|feeding behavior|adult locomotory behavior|post-embryonic development|cytoplasmic stress granule|membrane|integral component of membrane|posttranscriptional gene silencing|negative regulation of translation|spinal cord motor neuron differentiation|mitotic G1 DNA damage checkpoint|multicellular organism growth|perikaryon|protein co…
hsa-miR-1285-3p	NM_001103147.1	183	-32.37	183	-32.37	118017	22	7952	7557	GIGYF2	GeneID:26058,Genbank:NM_015575.3,HGNC:HGNC:11960,MIM:612003	GRB10 interacting GYF protein 2	GO:0003723,GO:0005768,GO:0005783,GO:0005794,GO:0005829,GO:0007631,GO:0008344,GO:0009791,GO:0010494,GO:0016020,GO:0016021,GO:0016441,GO:0017148,GO:0021522,GO:0031571,GO:0035264,GO:0043204,GO:0043234,GO:0044267,GO:0045296,GO:0048009,GO:0048873,GO:0050881,GO:0050885,GO:0061157,GO:0070064,GO:1990635	RNA binding|endosome|endoplasmic reticulum|Golgi apparatus|cytosol|feeding behavior|adult locomotory behavior|post-embryonic development|cytoplasmic stress granule|membrane|integral component of membrane|posttranscriptional gene silencing|negative regulation of translation|spinal cord motor neuron differentiation|mitotic G1 DNA damage checkpoint|multicellular organism growth|perikaryon|protein co…
hsa-miR-1285-3p	NM_001103148.1	183	-32.37	183	-32.37	118018	22	7735	7340	GIGYF2	GeneID:26058,Genbank:NM_015575.3,HGNC:HGNC:11960,MIM:612003	GRB10 interacting GYF protein 2	GO:0003723,GO:0005768,GO:0005783,GO:0005794,GO:0005829,GO:0007631,GO:0008344,GO:0009791,GO:0010494,GO:0016020,GO:0016021,GO:0016441,GO:0017148,GO:0021522,GO:0031571,GO:0035264,GO:0043204,GO:0043234,GO:0044267,GO:0045296,GO:0048009,GO:0048873,GO:0050881,GO:0050885,GO:0061157,GO:0070064,GO:1990635	RNA binding|endosome|endoplasmic reticulum|Golgi apparatus|cytosol|feeding behavior|adult locomotory behavior|post-embryonic development|cytoplasmic stress granule|membrane|integral component of membrane|posttranscriptional gene silencing|negative regulation of translation|spinal cord motor neuron differentiation|mitotic G1 DNA damage checkpoint|multicellular organism growth|perikaryon|protein co…
hsa-miR-1285-3p	NM_001104554.1	180	-33.61	180	-33.61	118034	22	5480	5000	PAQR5	GeneID:54852,Genbank:XM_017022364.1,HGNC:HGNC:29645,MIM:607781	progestin and adipoQ receptor family member 5	GO:0003707,GO:0005496,GO:0005886,GO:0007275,GO:0016021,GO:0048477,GO:0048545	steroid hormone receptor activity|steroid binding|plasma membrane|multicellular organism development|integral component of membrane|oogenesis|response to steroid hormone
[truncated: 33,589 more rows]
